# Supplementary material for: Expanding the Geographic Characterisation of Epstein–Barr Virus Variation through Gene-Based Approaches
Source: MDPI journal article supplement (doi:10.3390/microorganisms8111686), 2020-10-29

### **Supplementary Figure 6**

**Optimal grouping selection. Grouping statistics per gene.** The dots represent the MCC value for each grouping; the black dots represent groupings for which the isolates inside valid clusters are above 50% of the total number of isolates for the gene, the red dots represent the ones that do not meet this criterion. The green line represents the number of valid clusters in each grouping (*i.e.* clusters formed by at least 3 isolates). The orange line represents the Clustering per Geography Score (CGS) given by the MCC value multiplied for the number of valid clusters. The grouping with the maximum point reached by the orange line where the isolates in valid clusters is more than 50% of the total (black dots), indicates the optimum grouping for the gene. A second grouping was chosen as the one with the maximum MCC score within those including at least 50% of the isolates in valid clusters (*i.e.* higher black dot).

BDLF4 : grouping per country

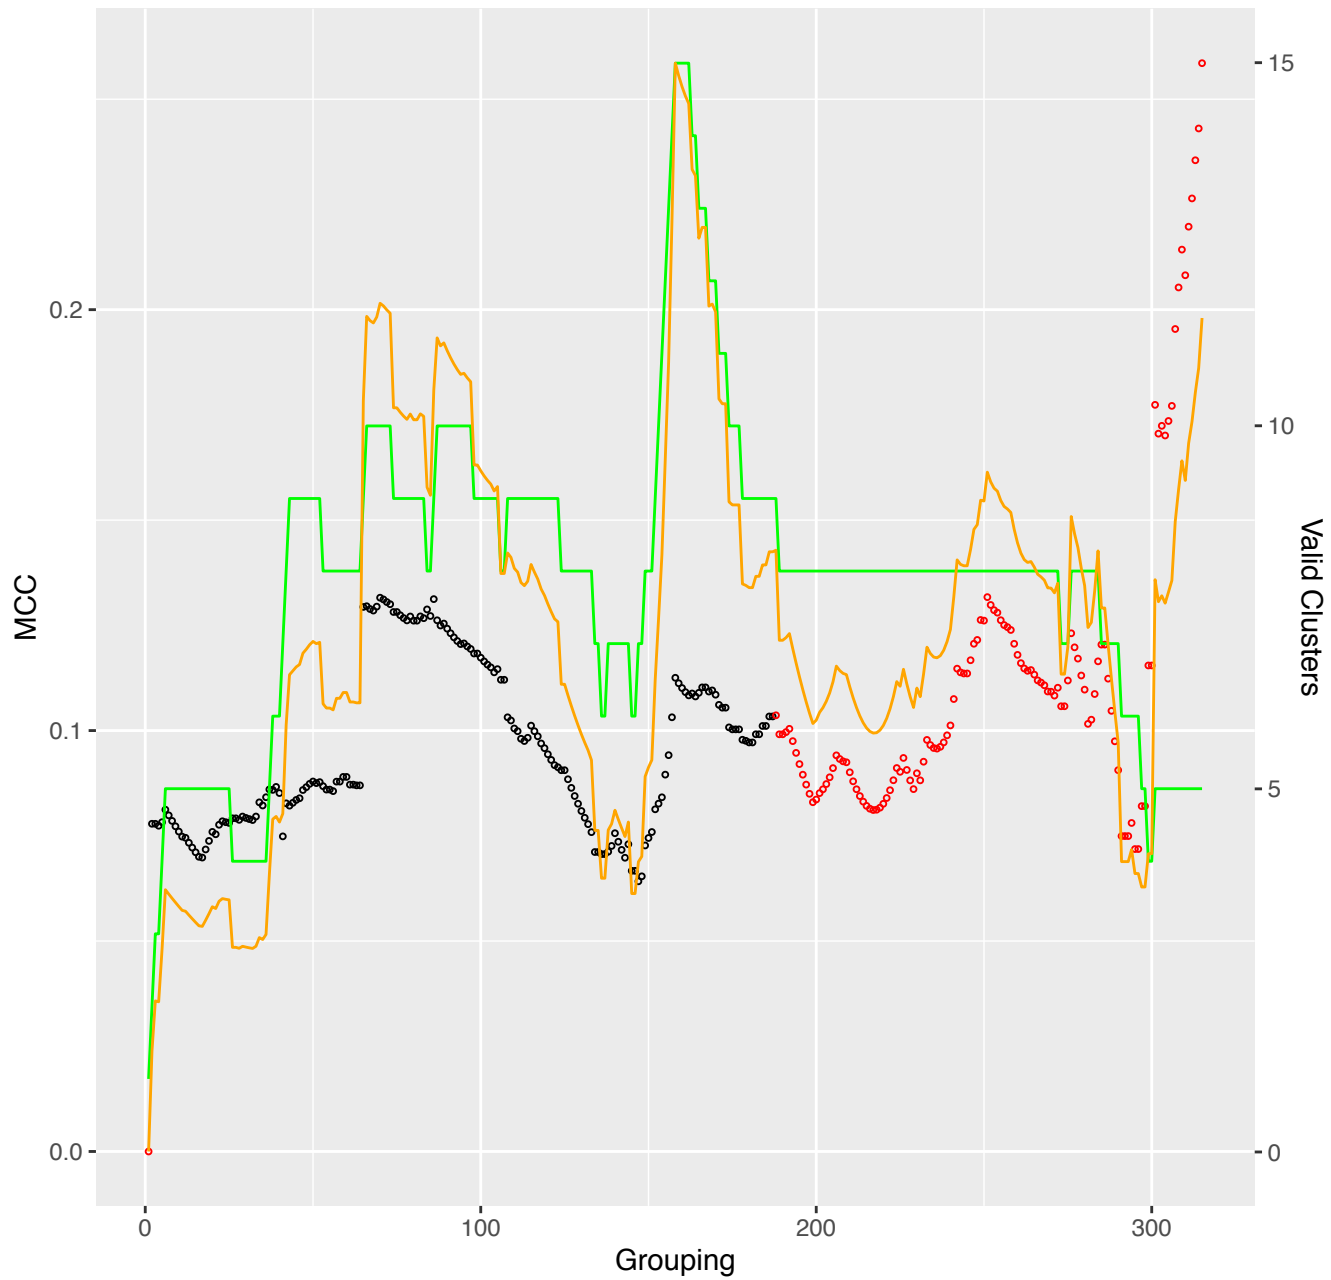

BDLF4 : grouping per continent

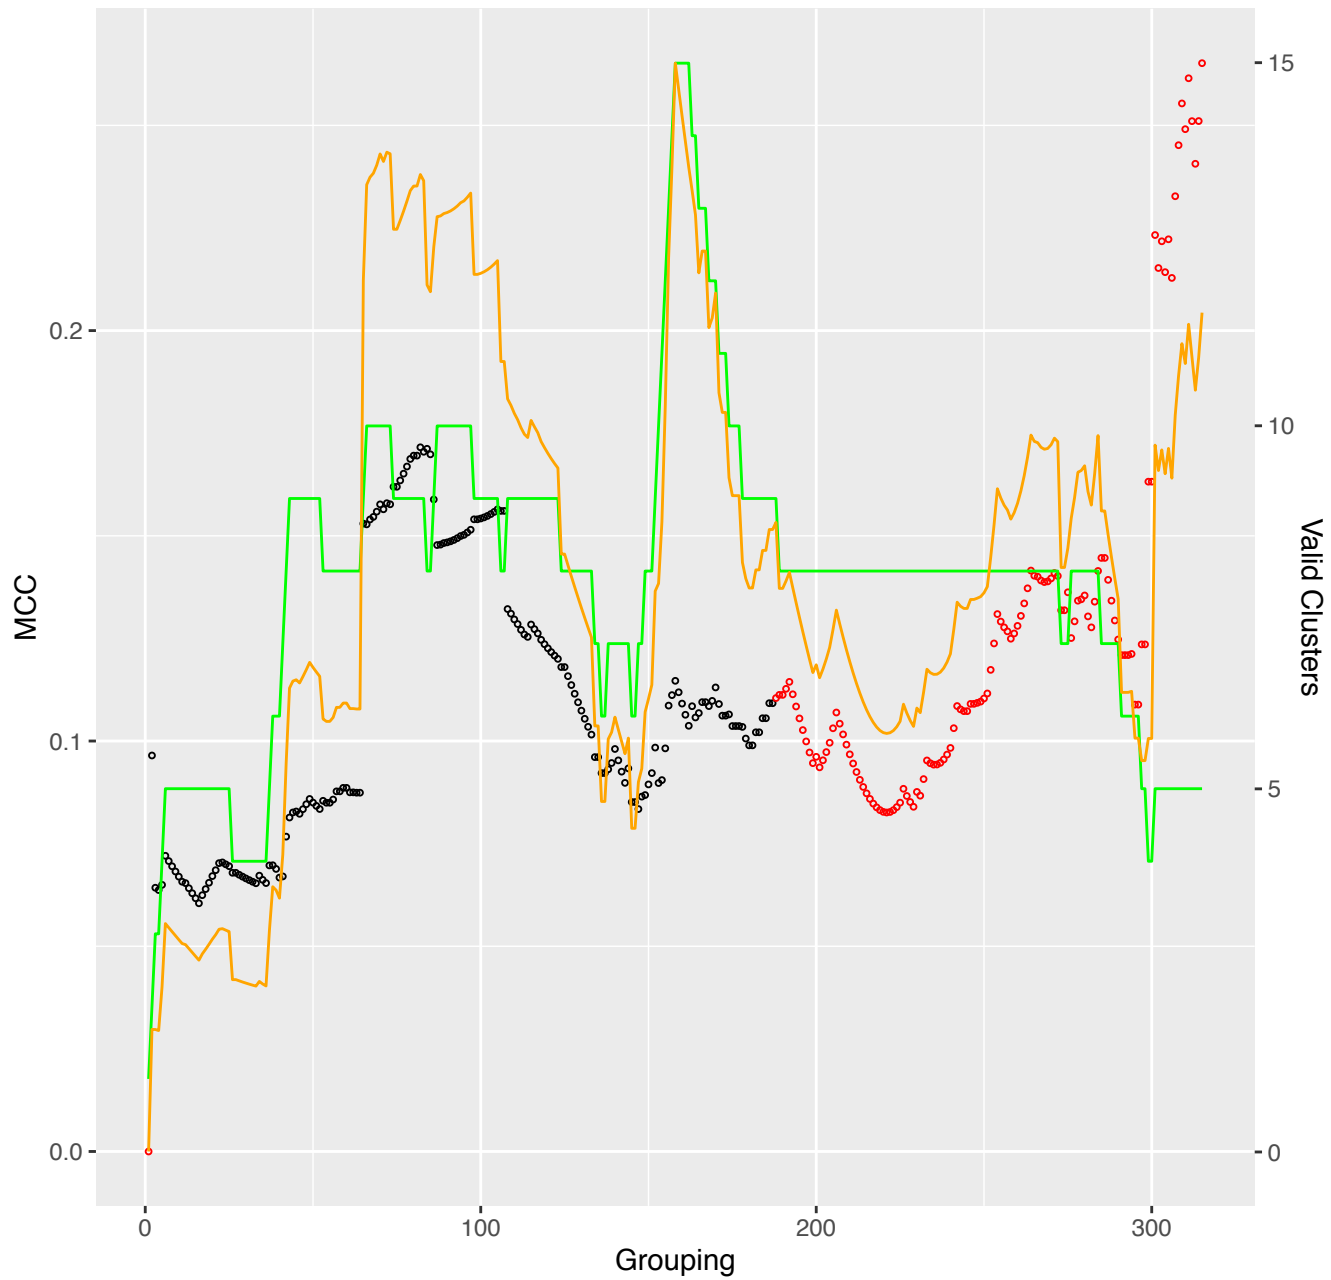

BGLF4 : grouping per country

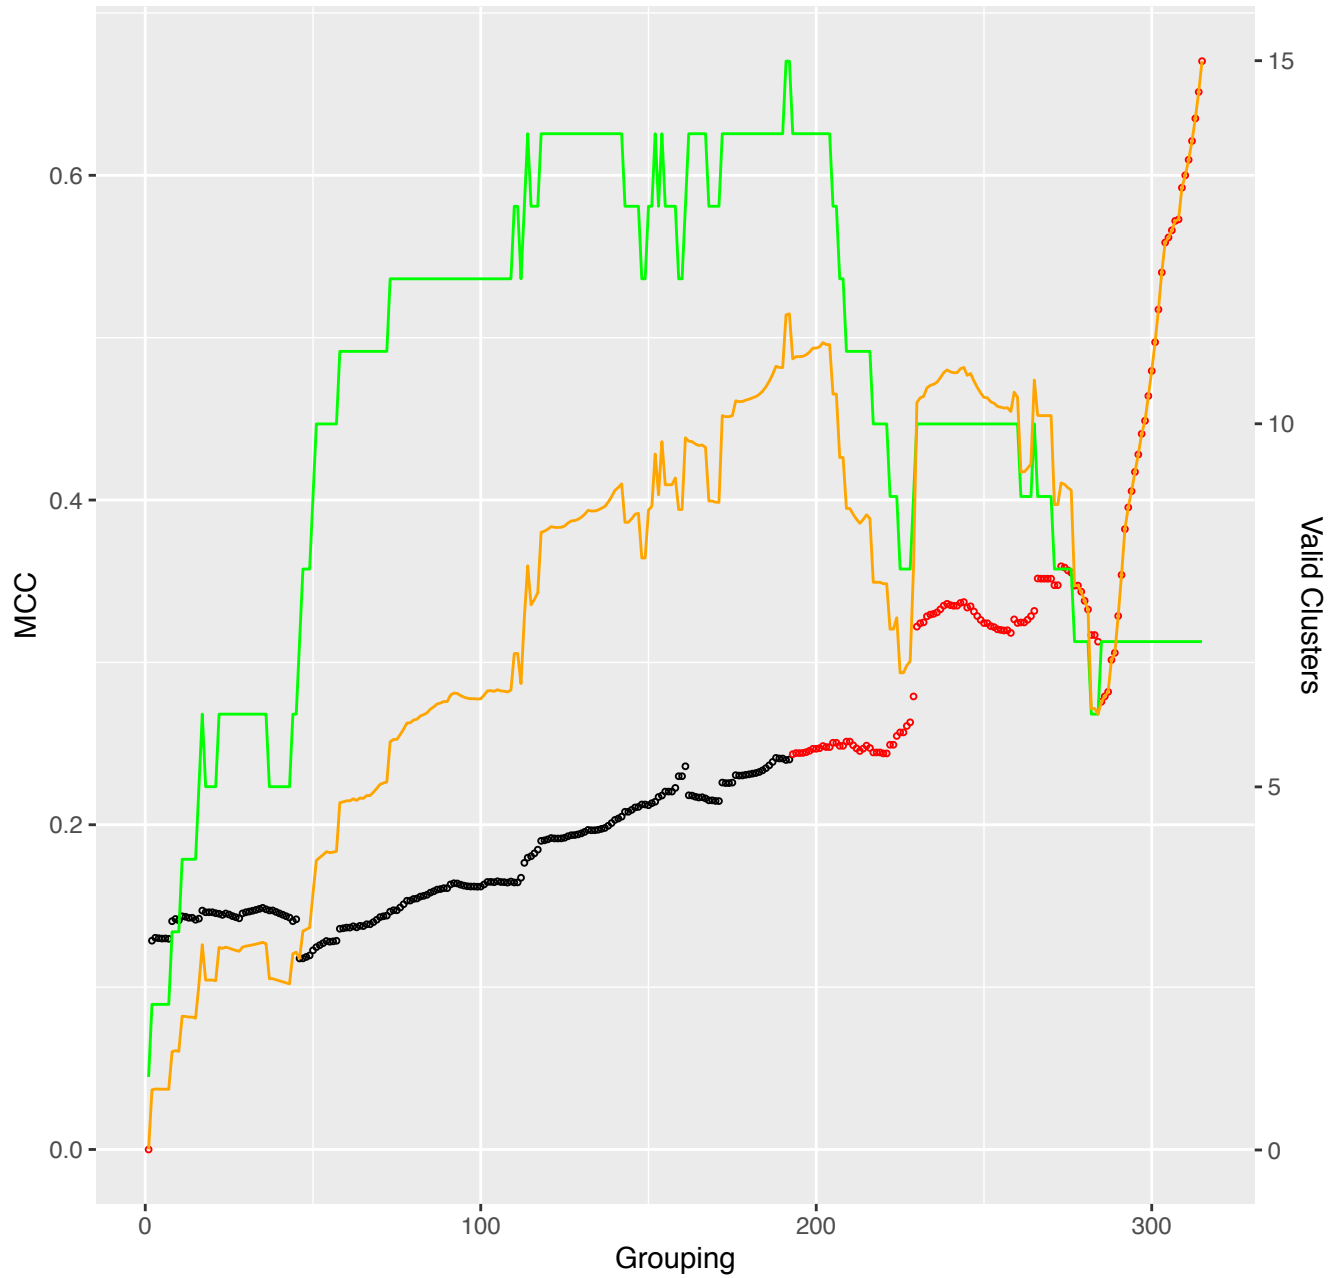

BGLF4 : grouping per continent

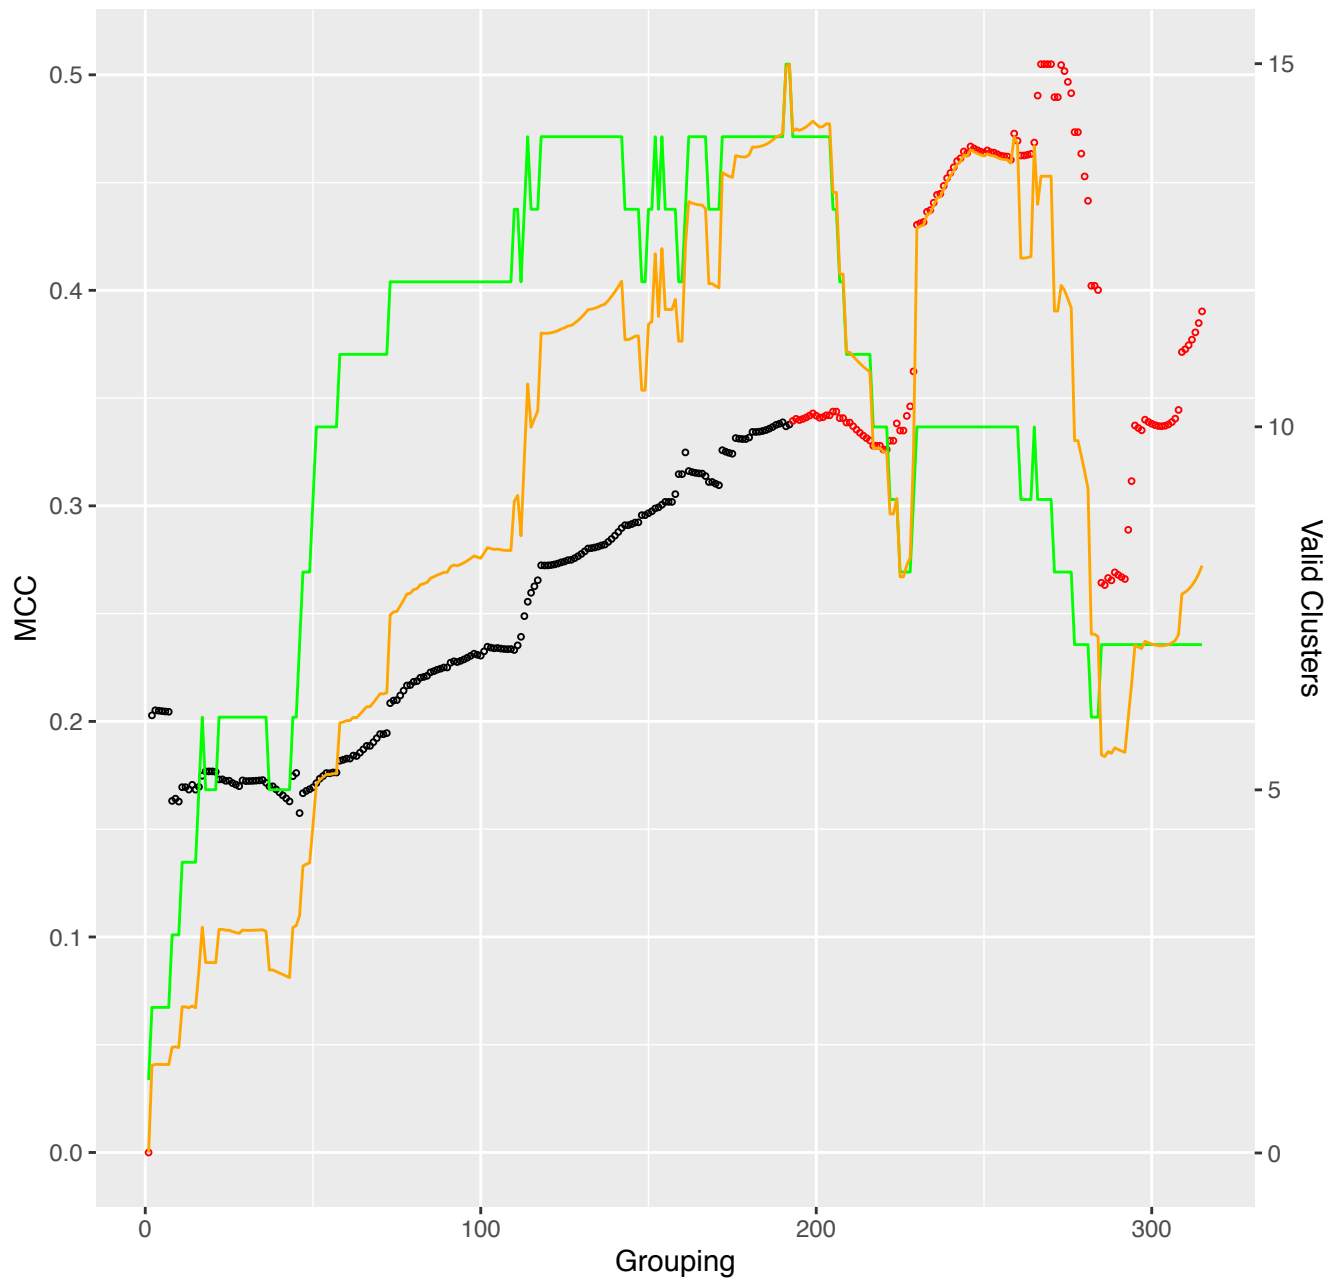

BHRF1 : grouping per country

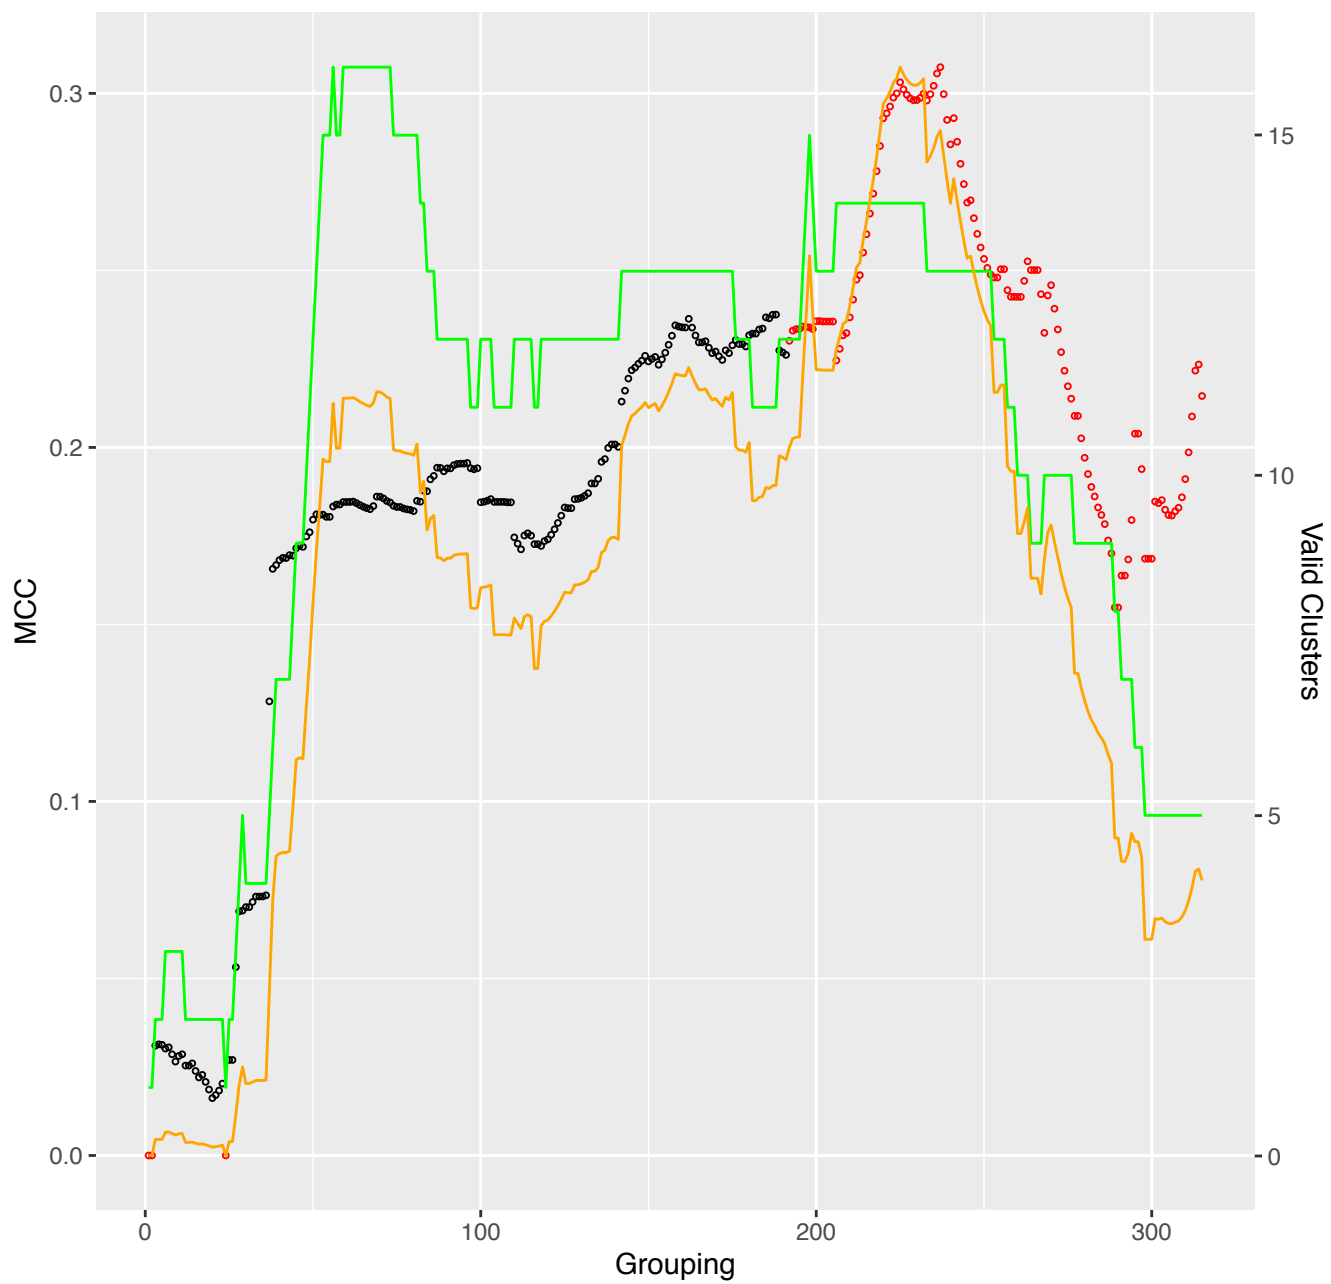

BHRF1 : grouping per continent

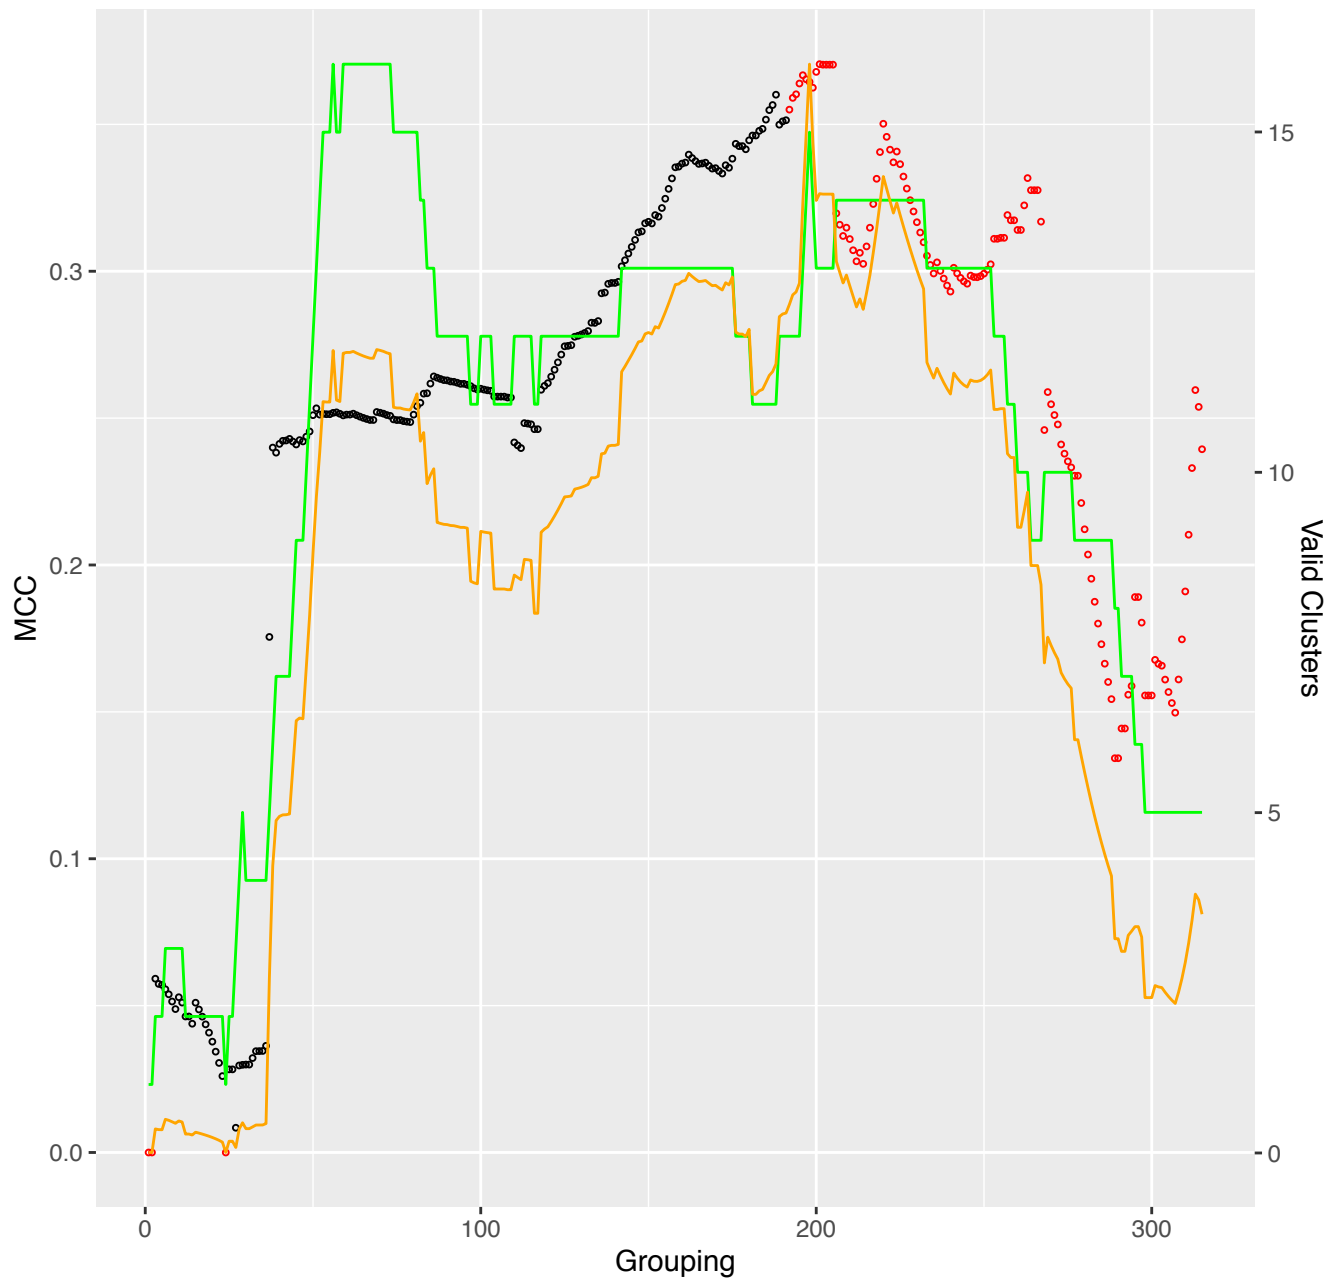

BRLF1 : grouping per country

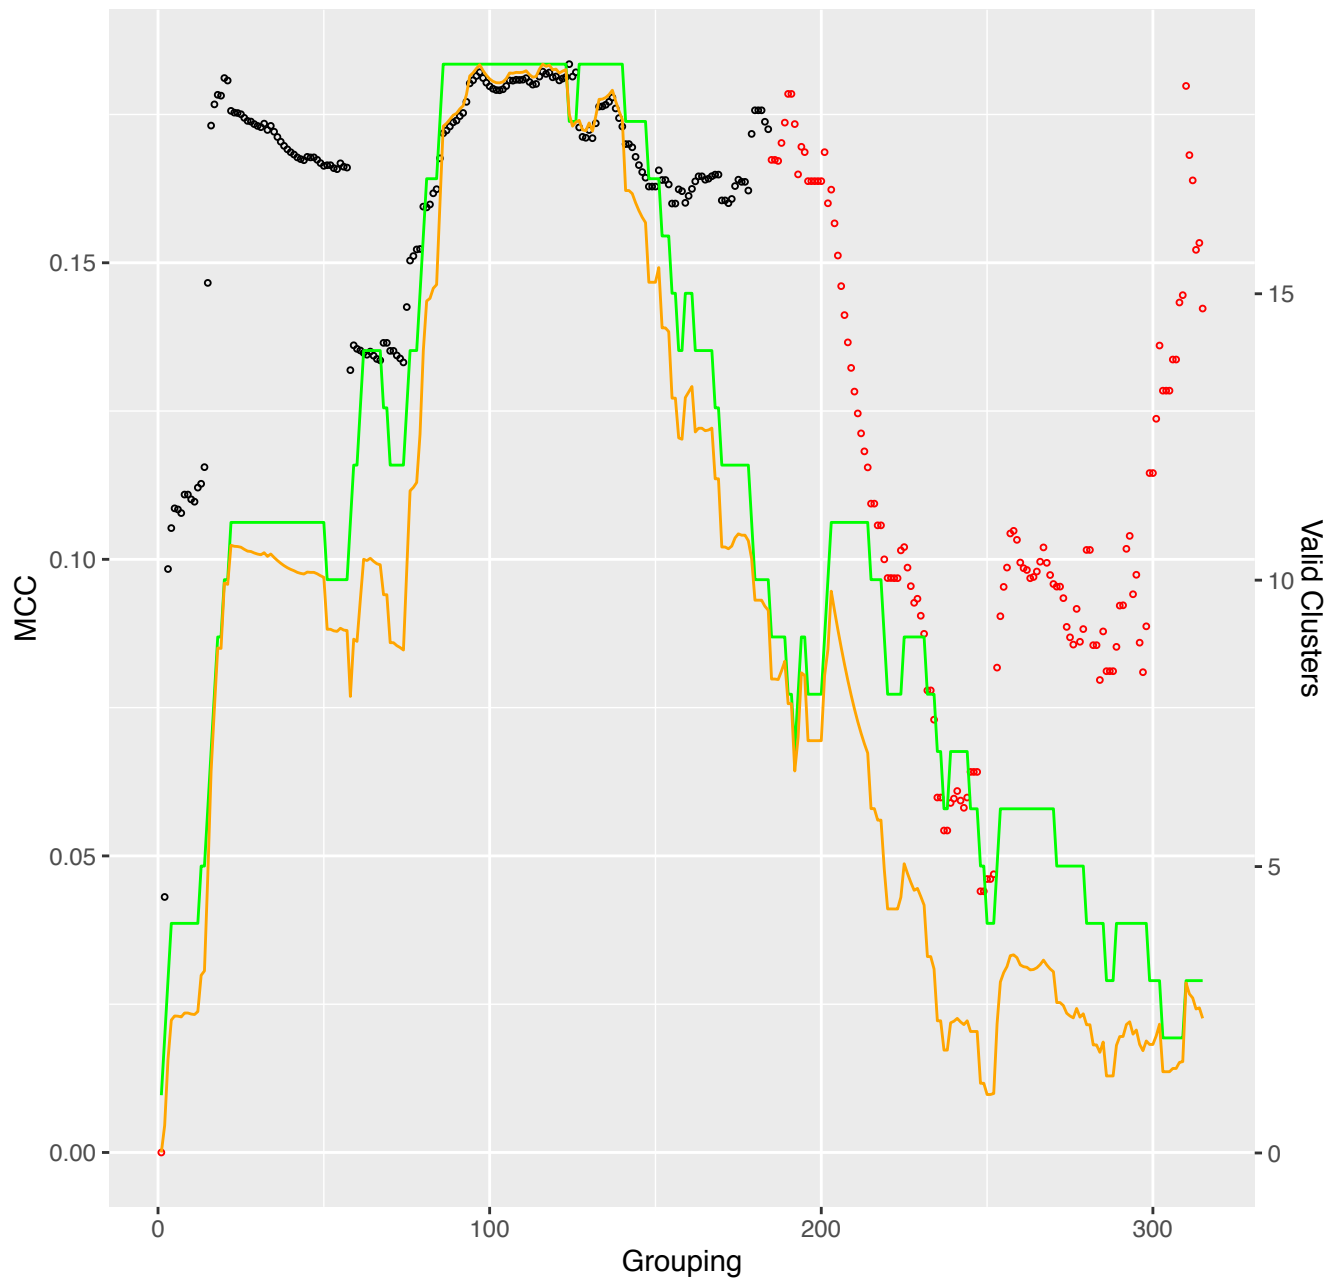



BRLF1 : grouping per continent

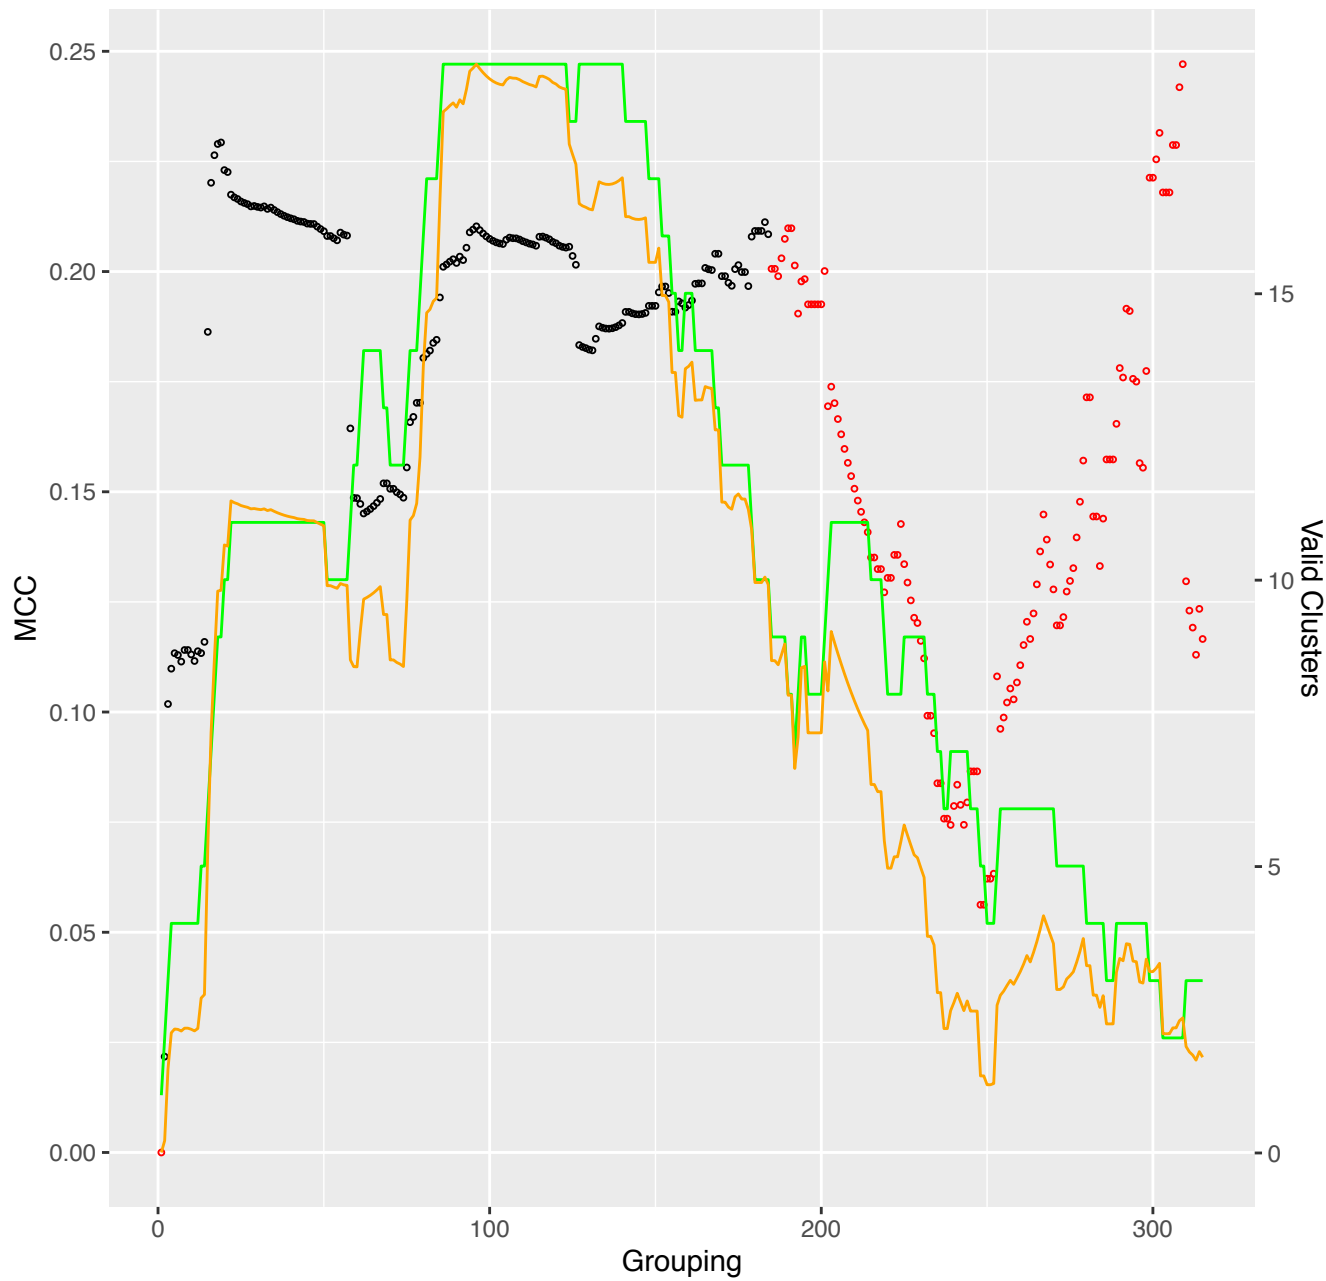

BZLF1 : grouping per country

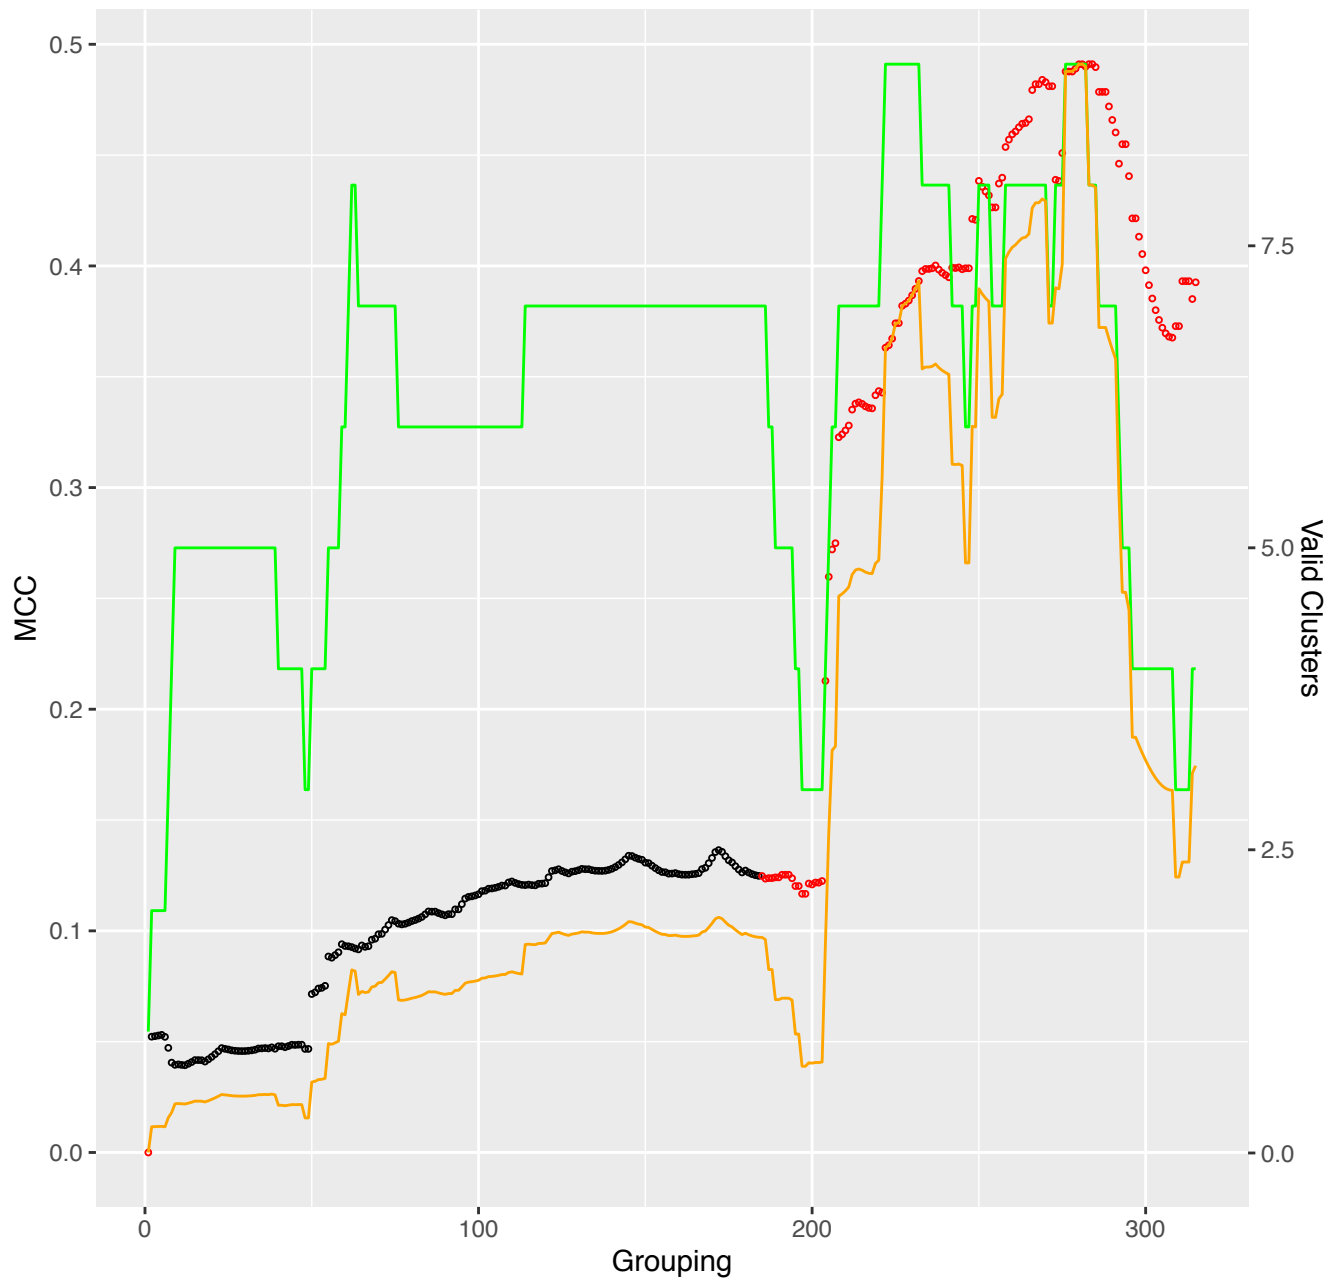

BZLF1 : grouping per continent

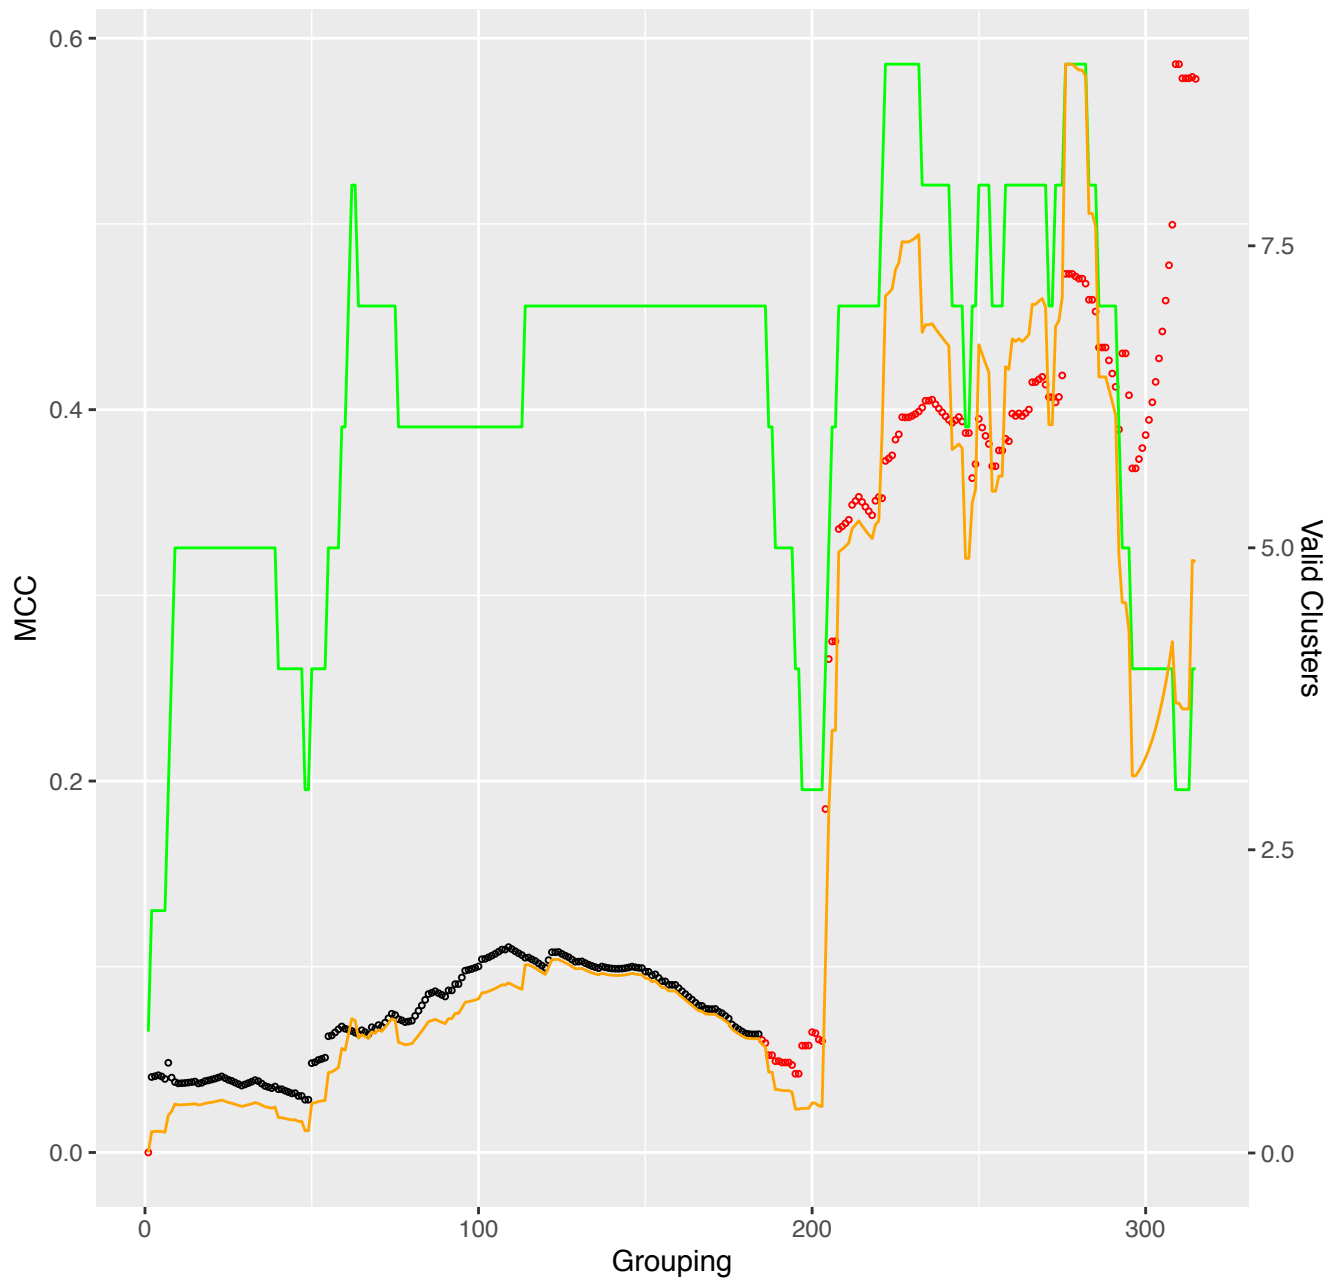

EBER-1 : grouping per country

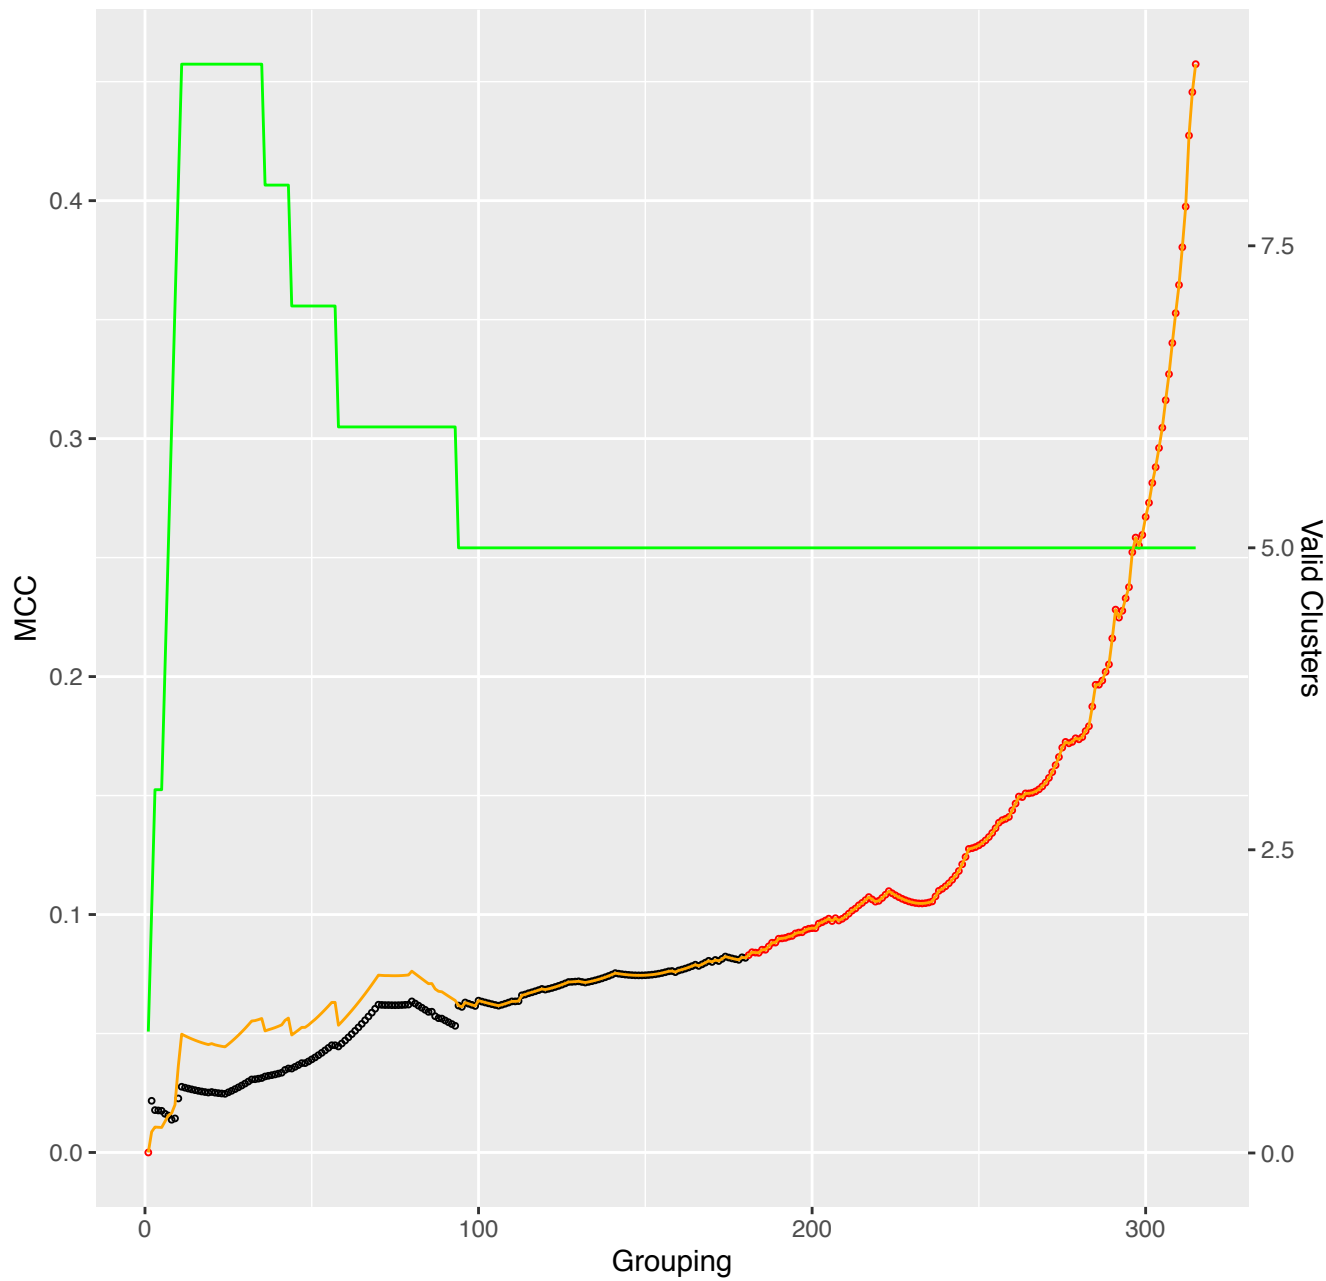

EBER-1 : grouping per continent

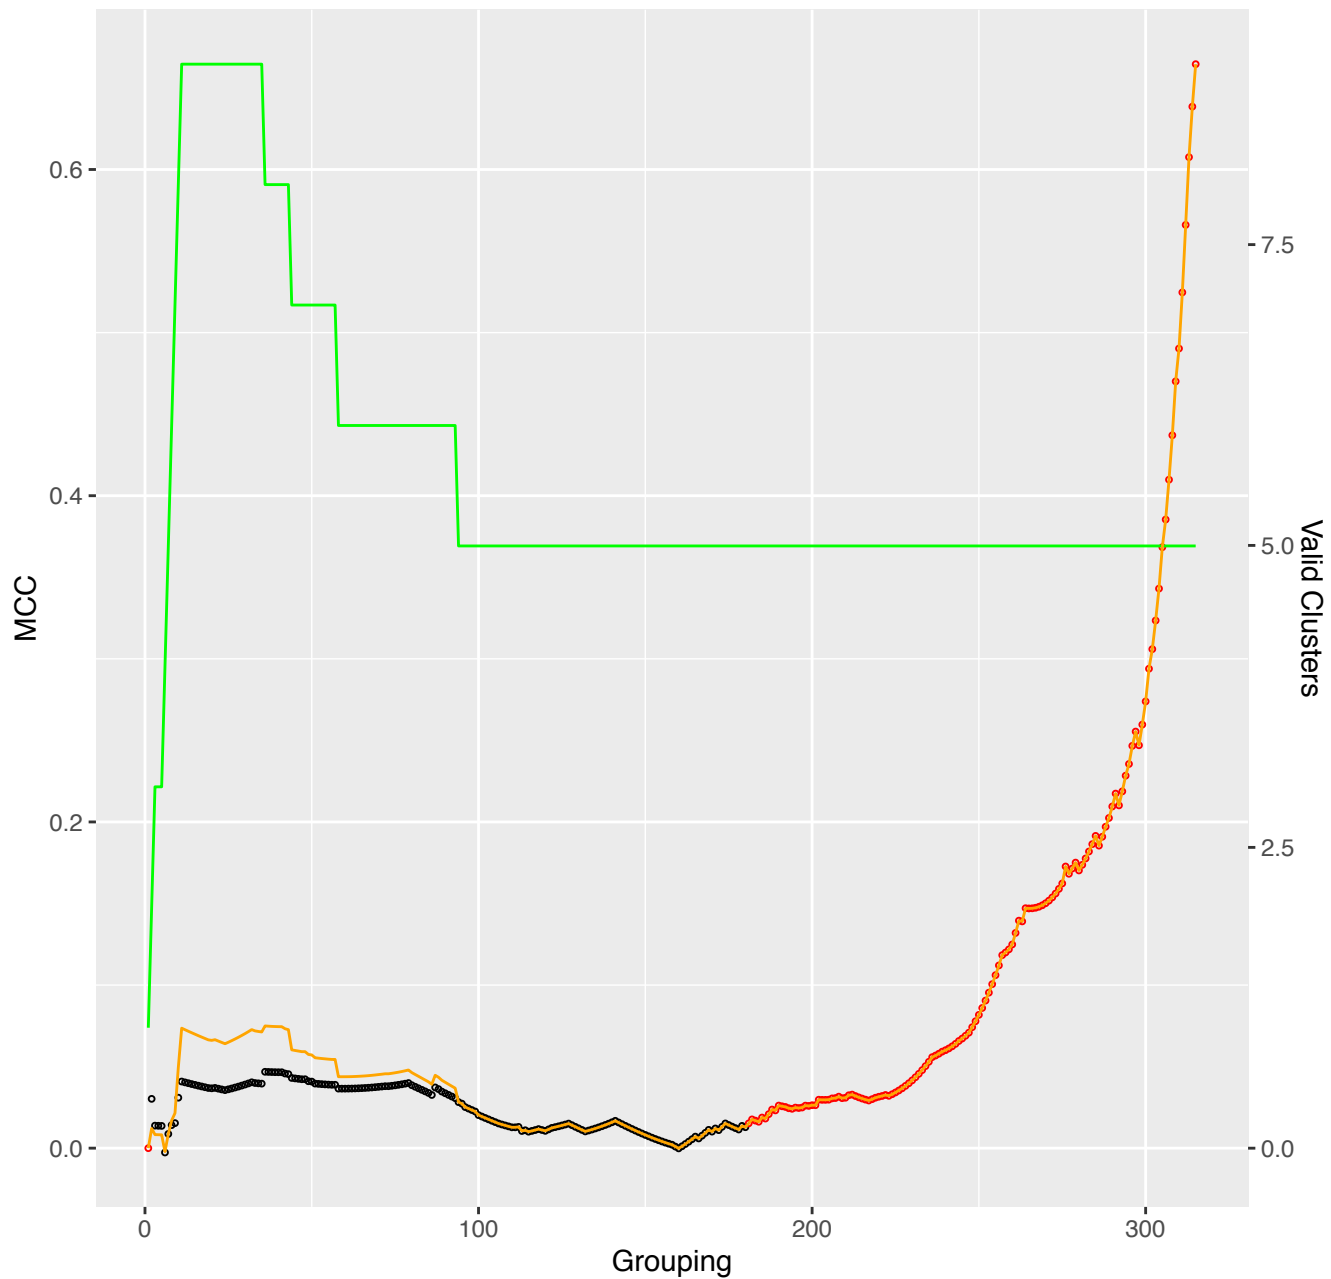

EBER-2 : grouping per country

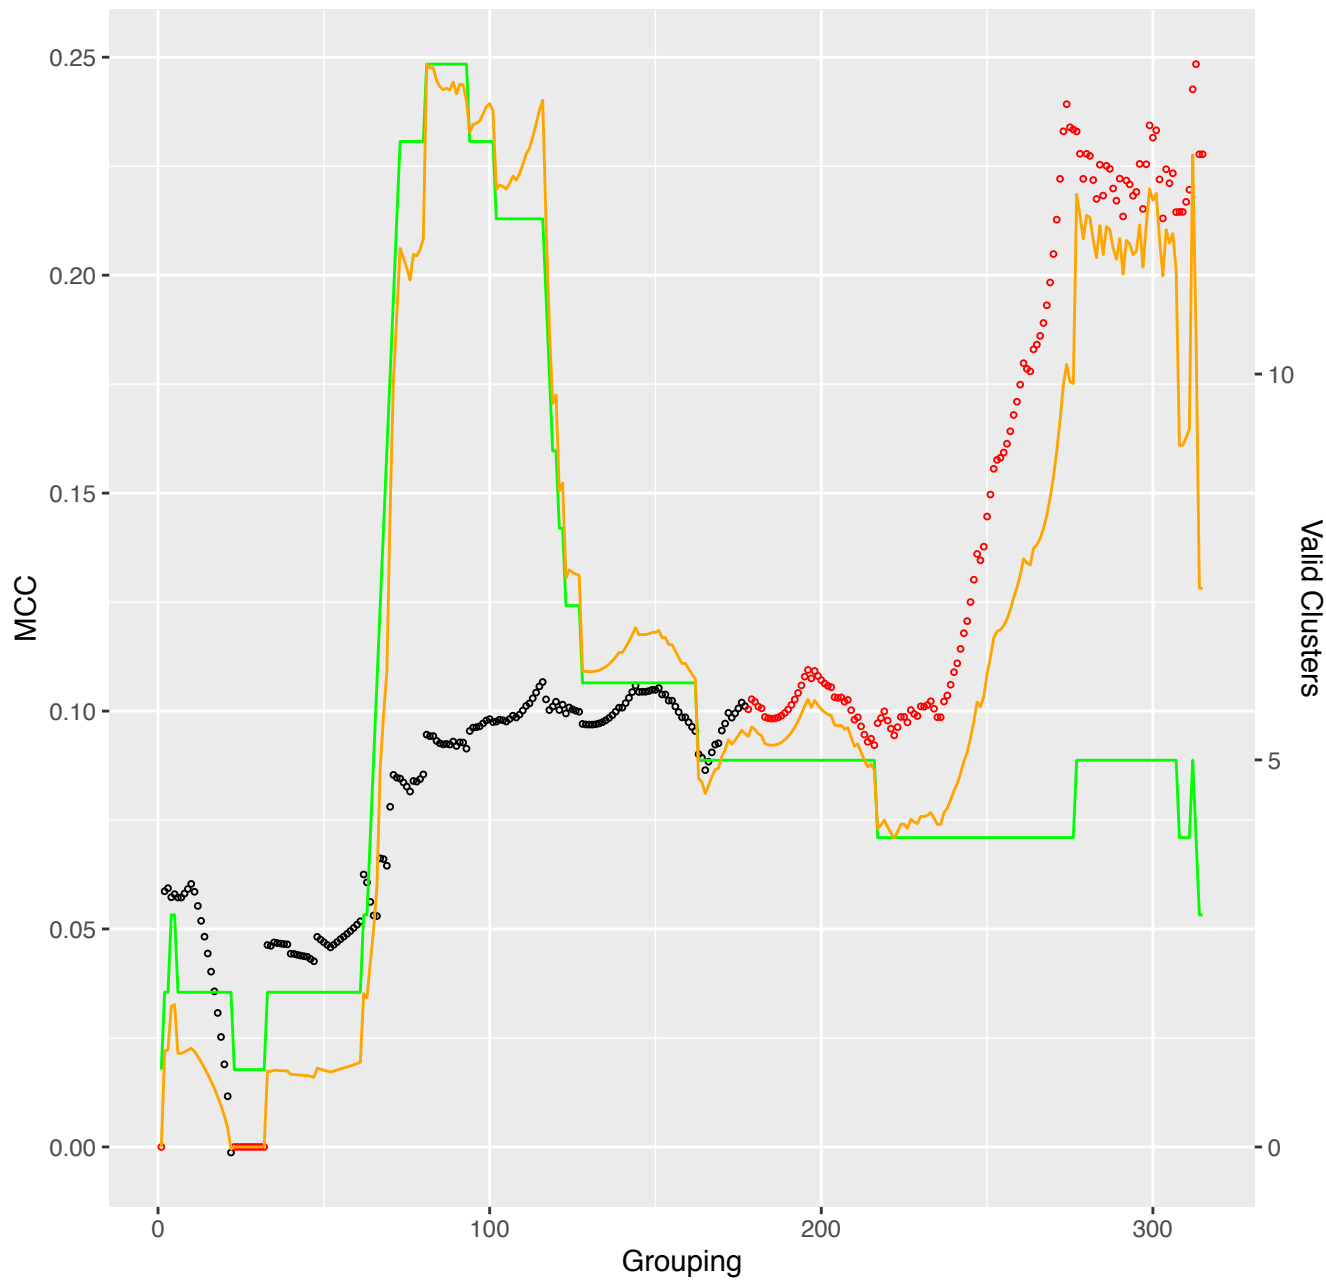

EBER-2 : grouping per continent

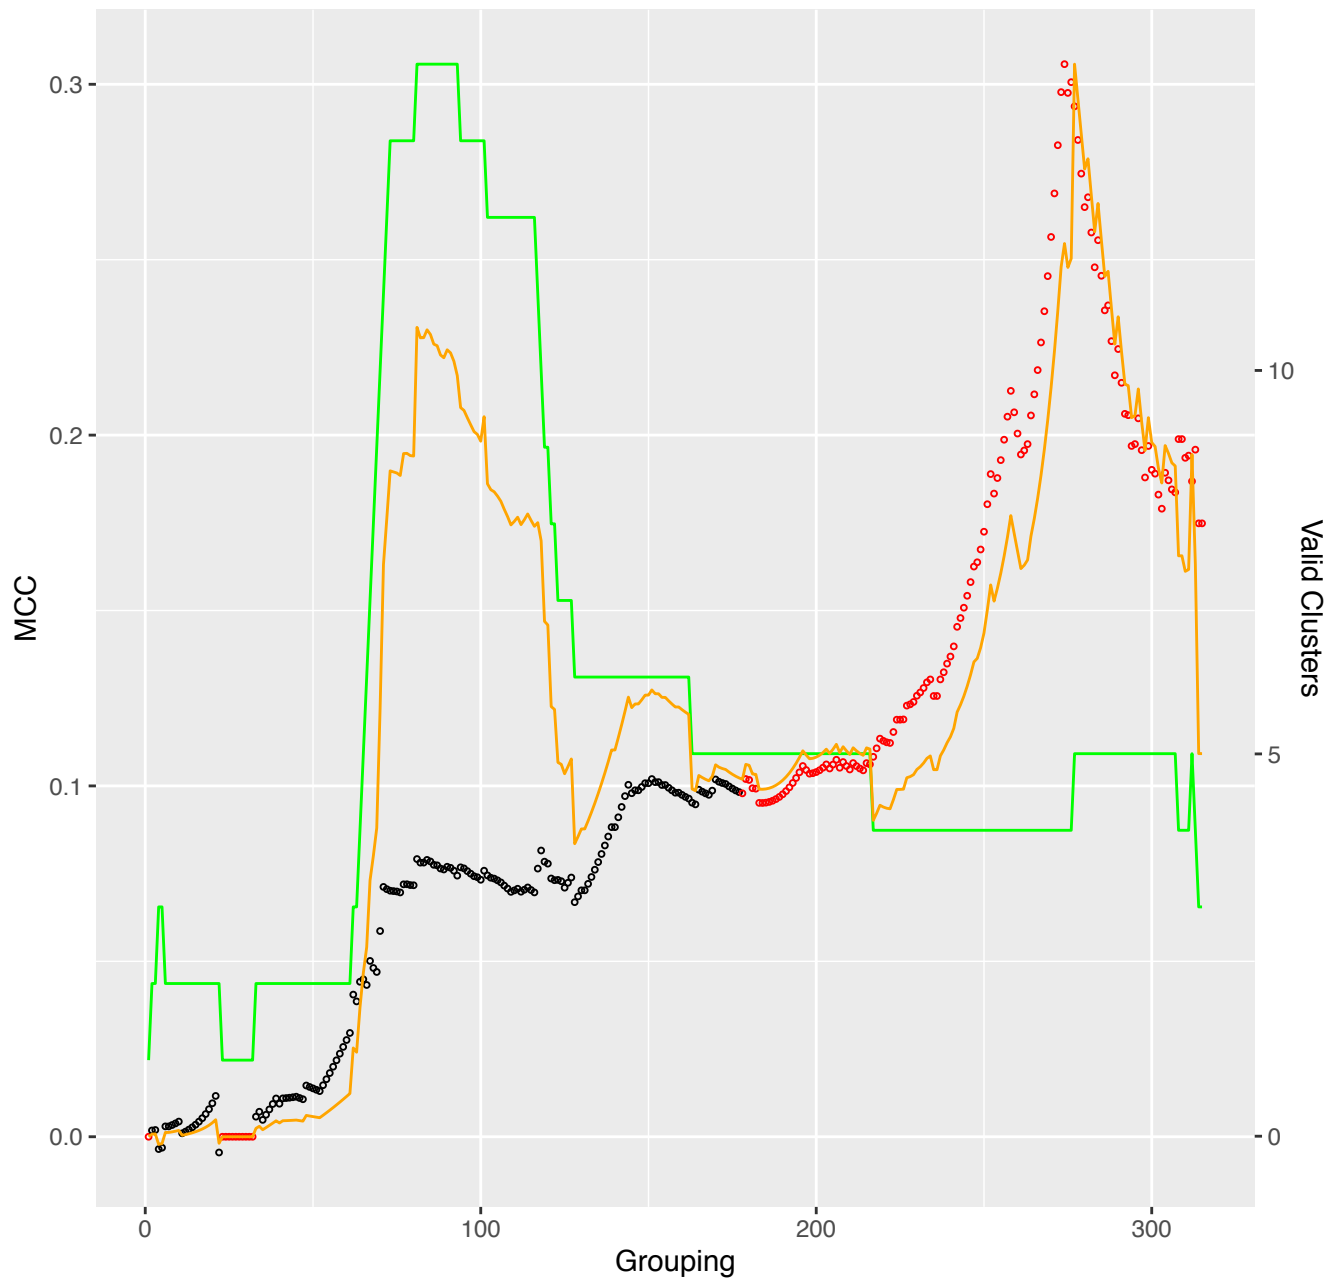

EBNA-1 : grouping per country

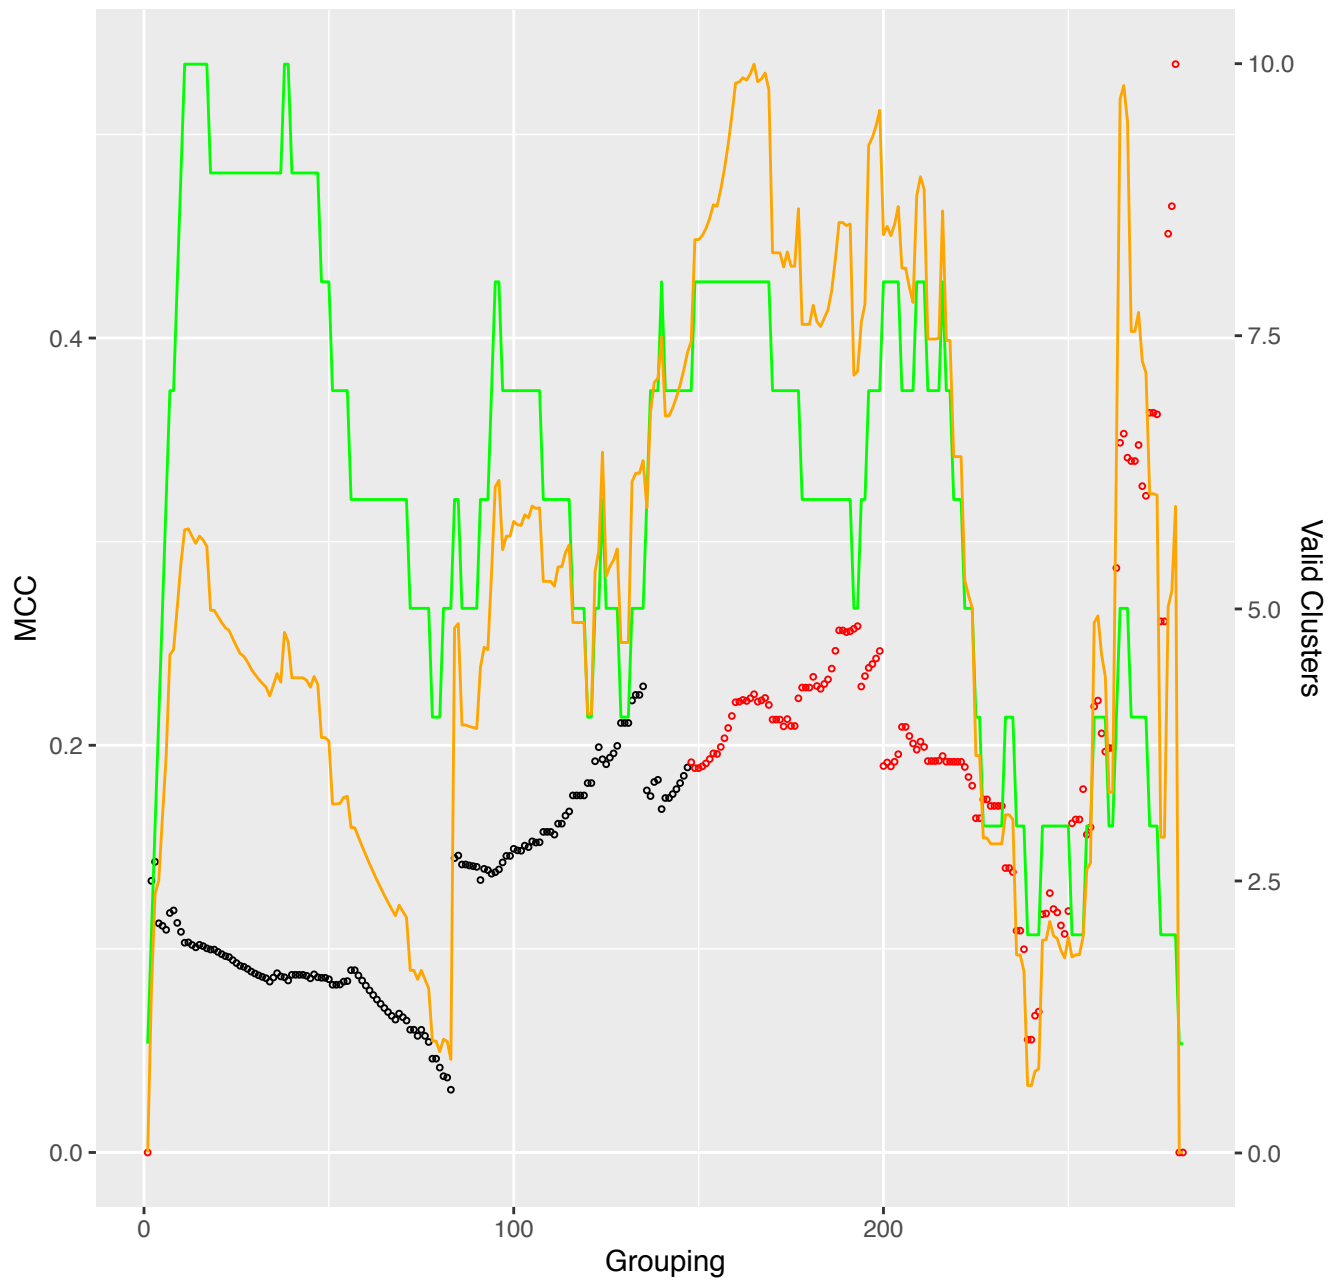



EBNA-1 : grouping per continent

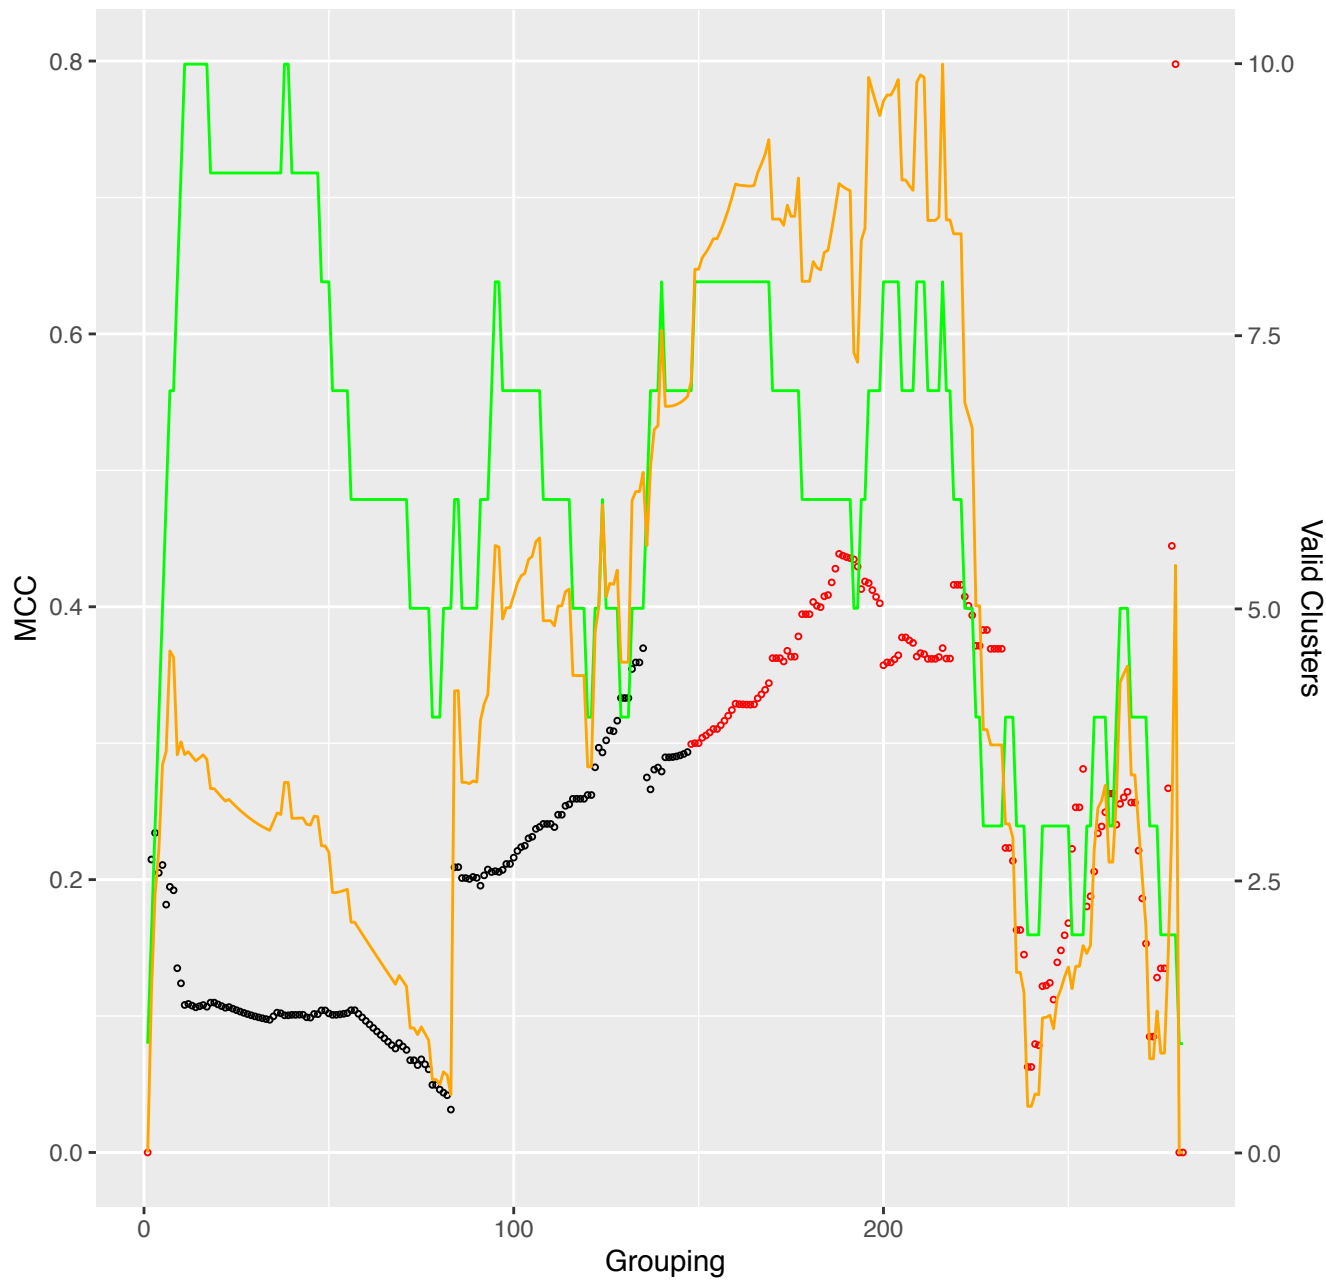

EBNA-2 : grouping per country

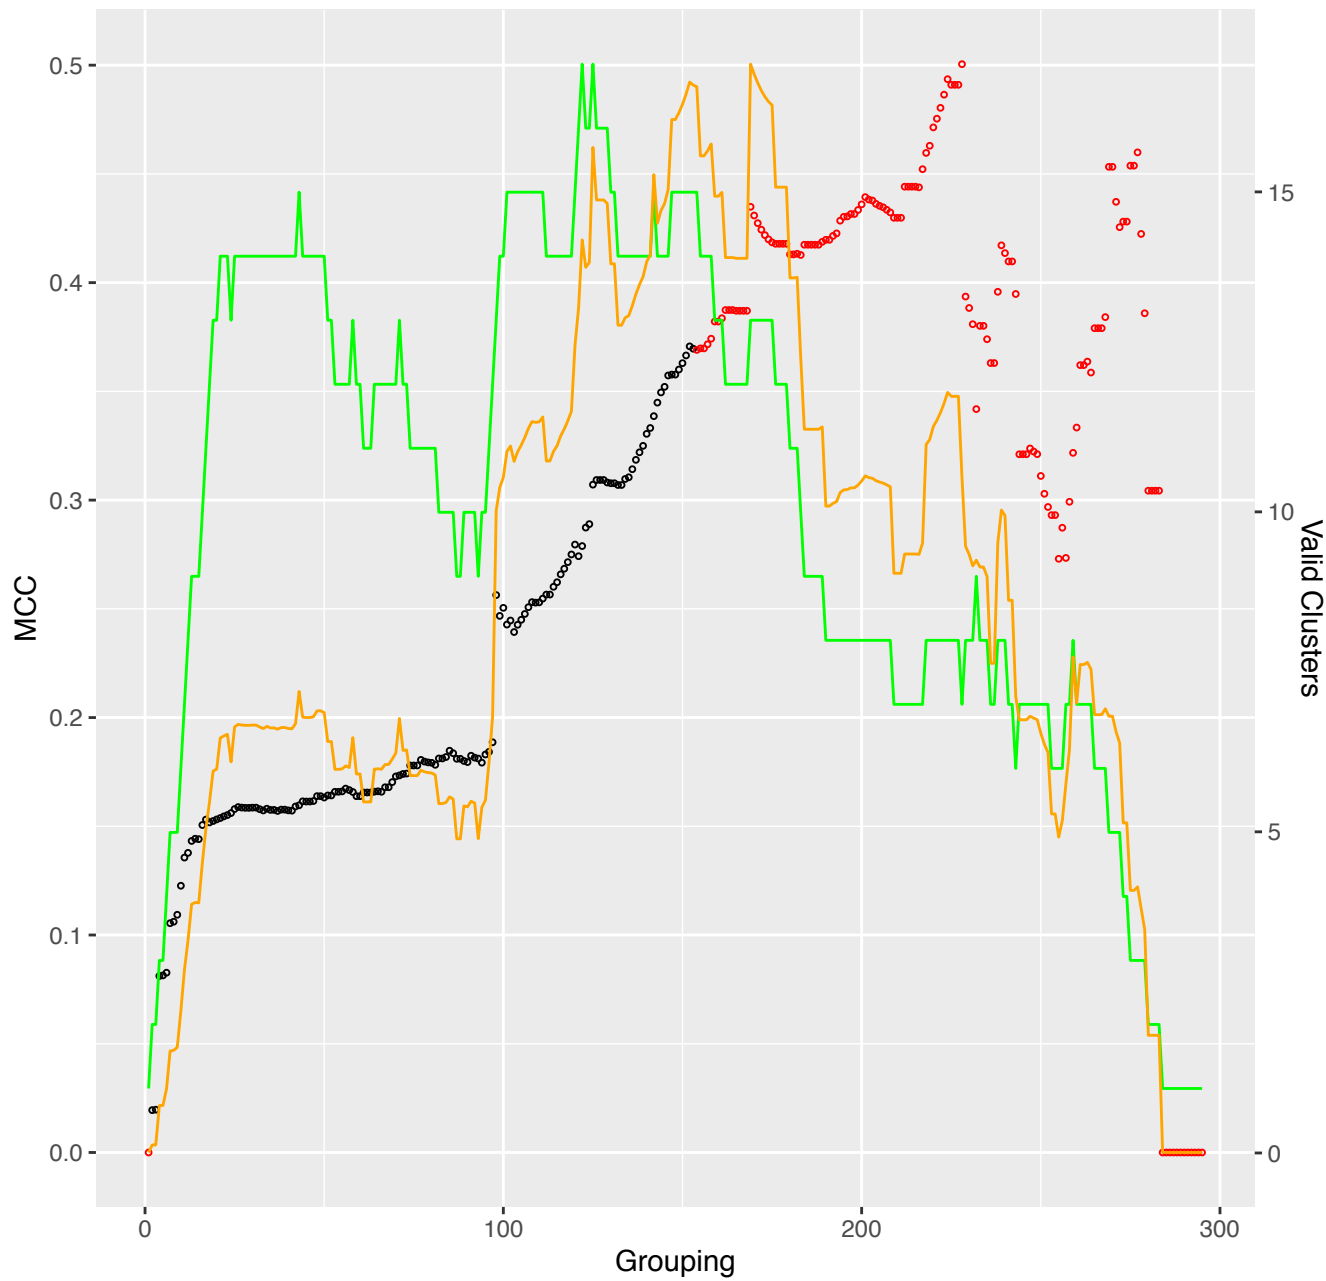

EBNA-2 : grouping per continent

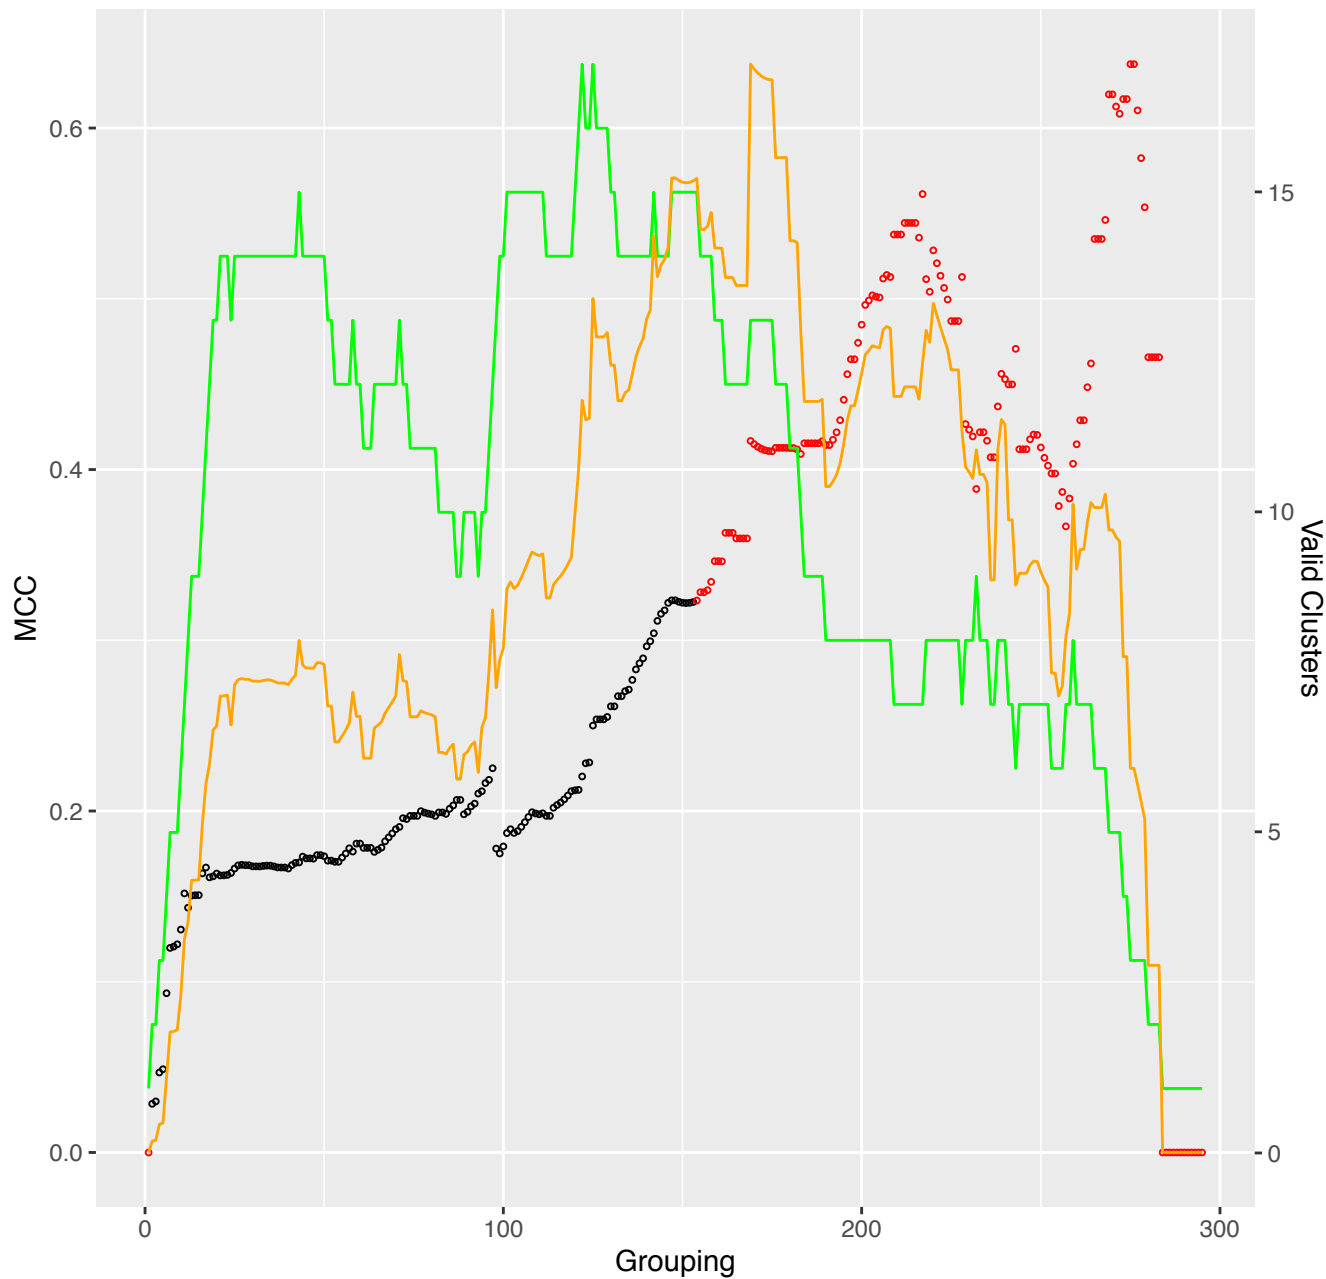

EBNA-2\_type1 : grouping per country

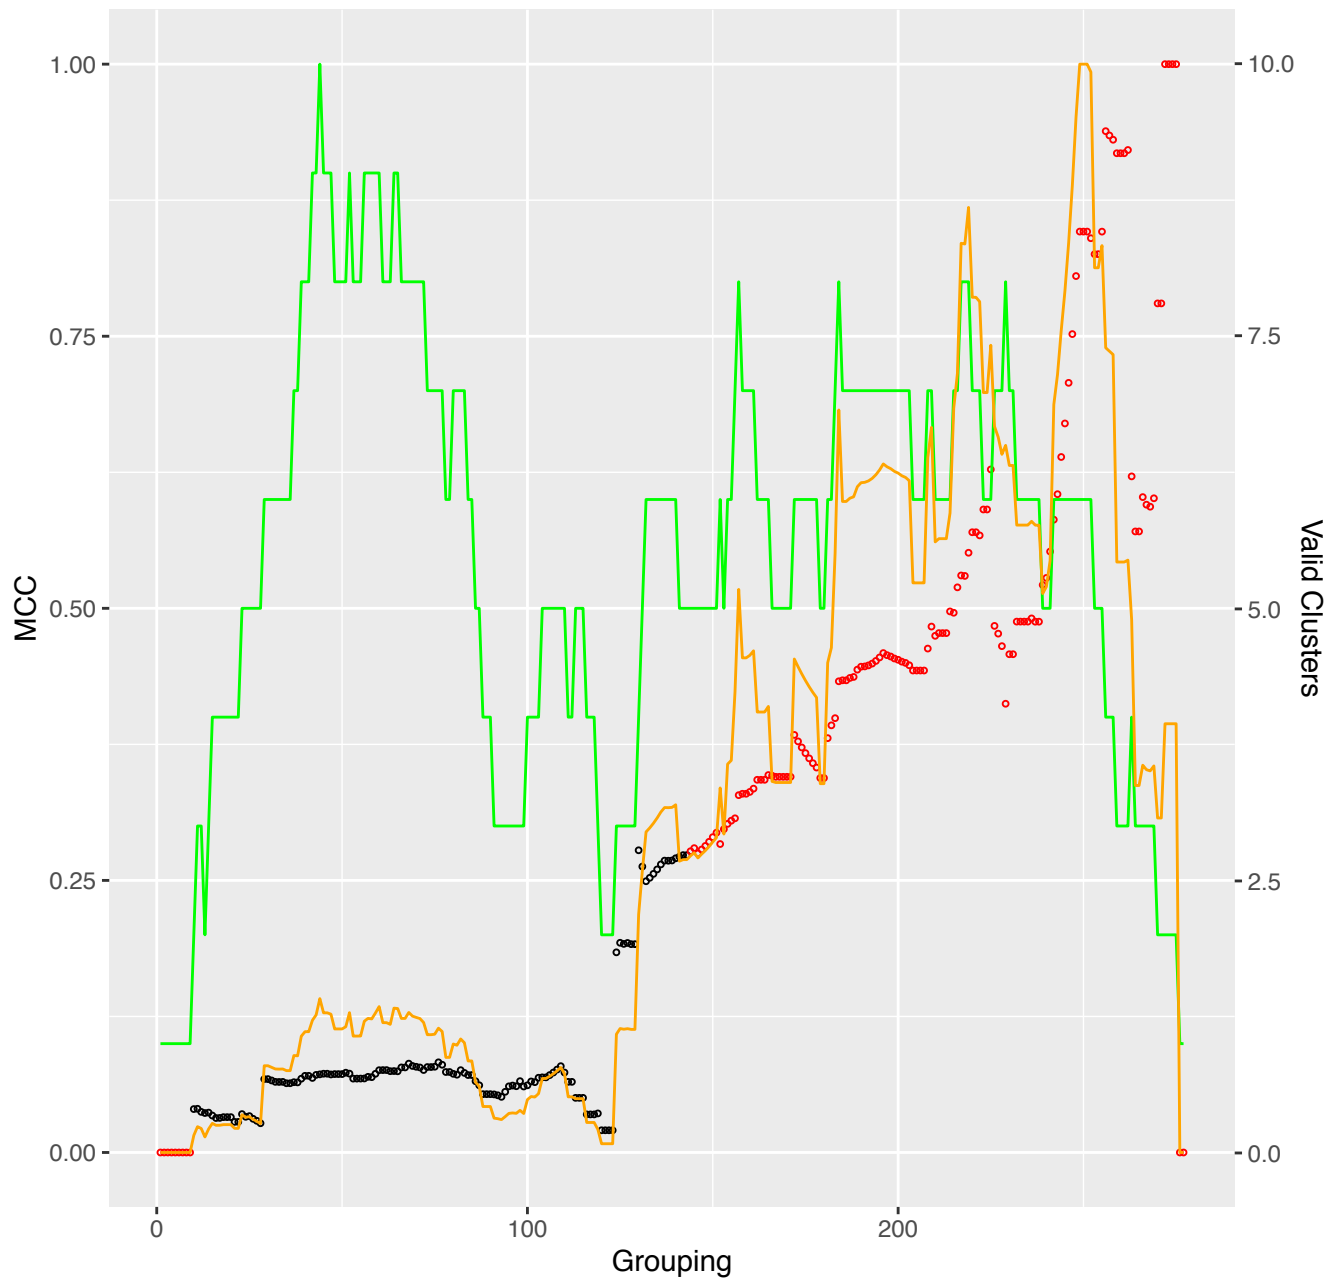

EBNA-2\_type1 : grouping per continent

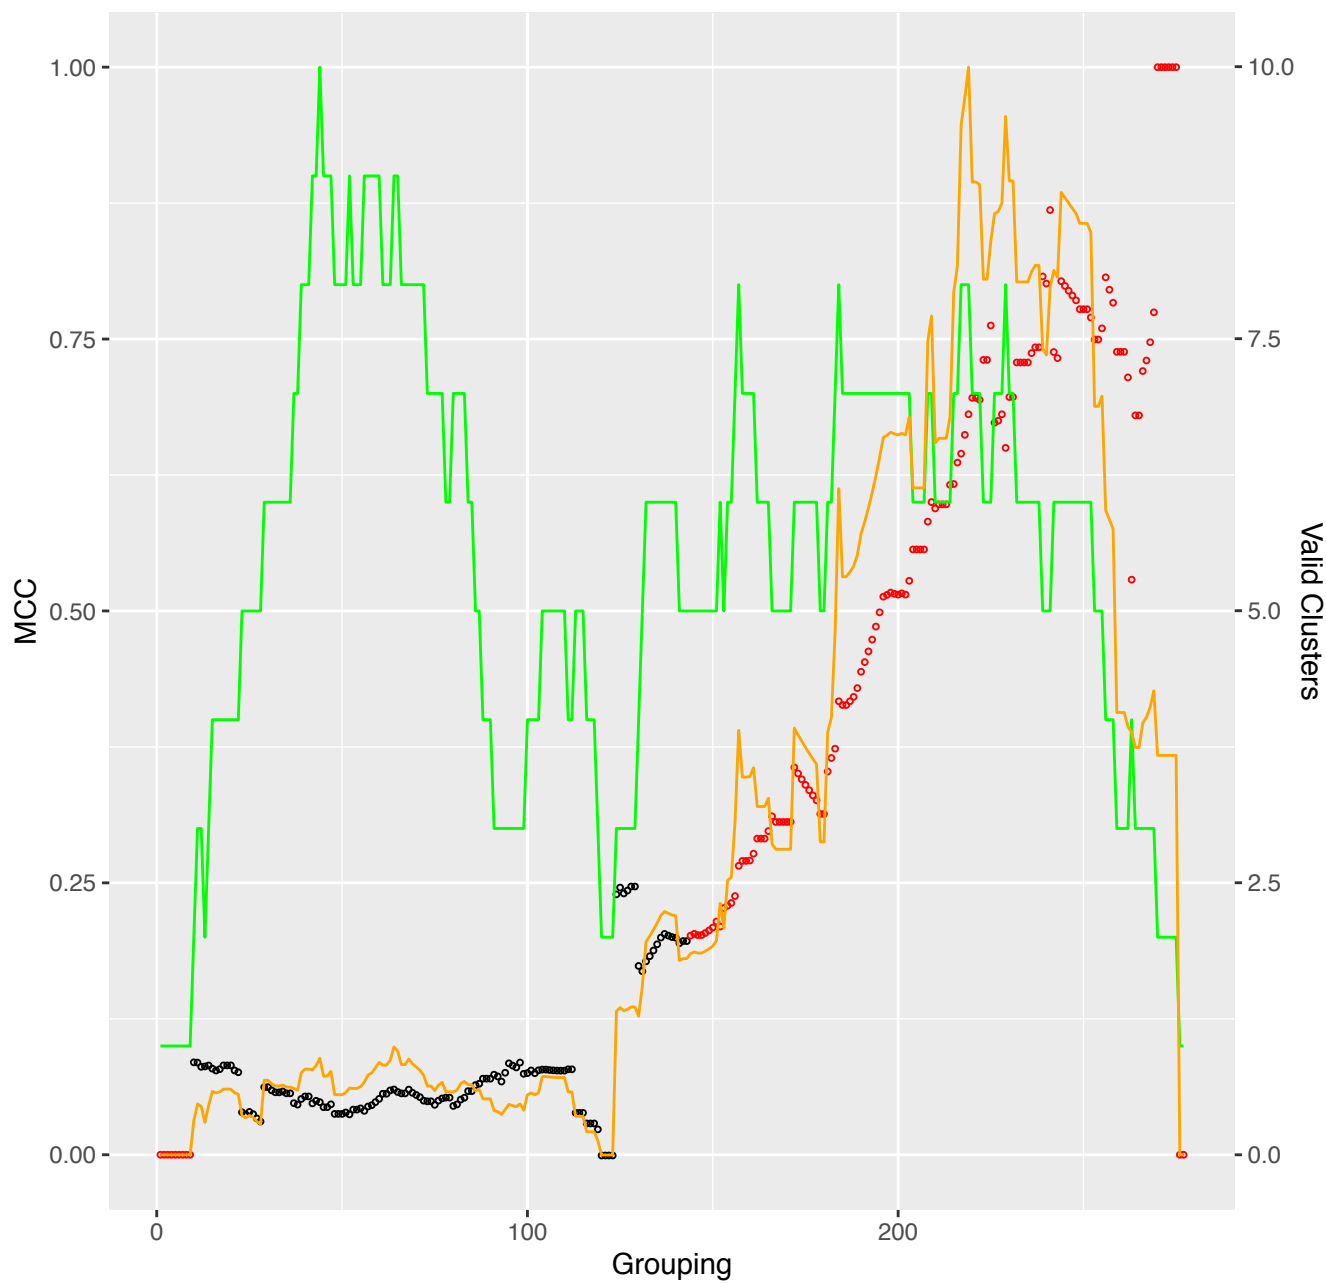

EBNA-3A : grouping per country

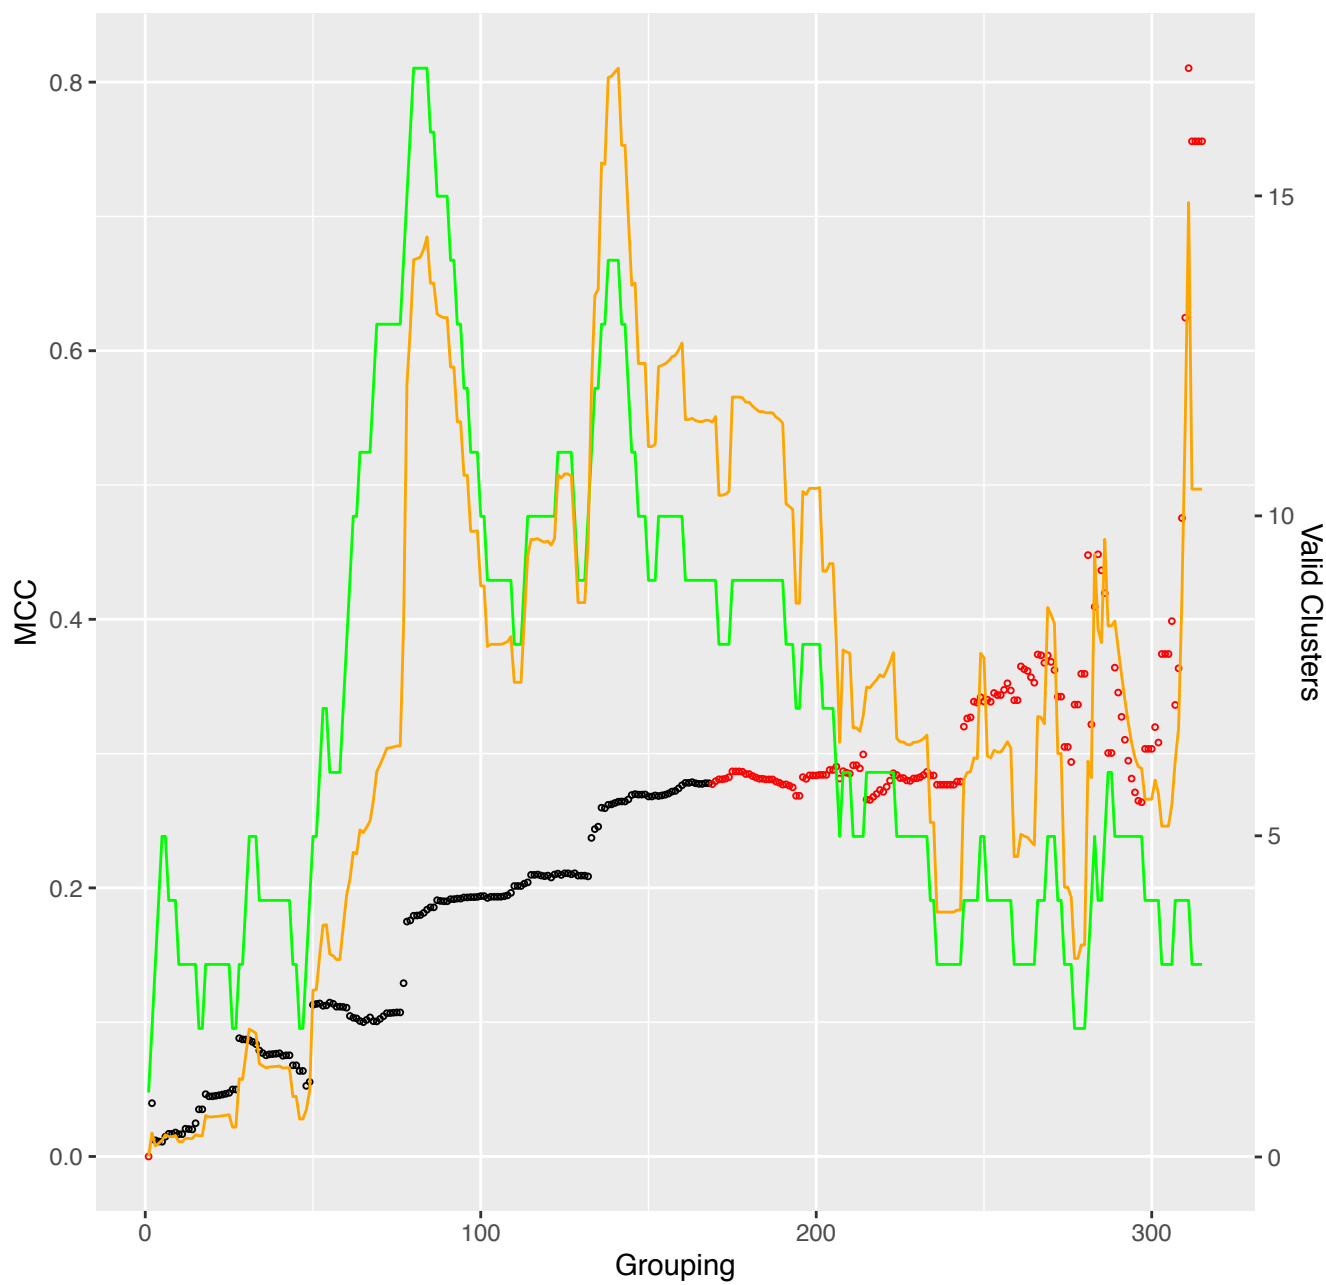

EBNA-3A : grouping per continent

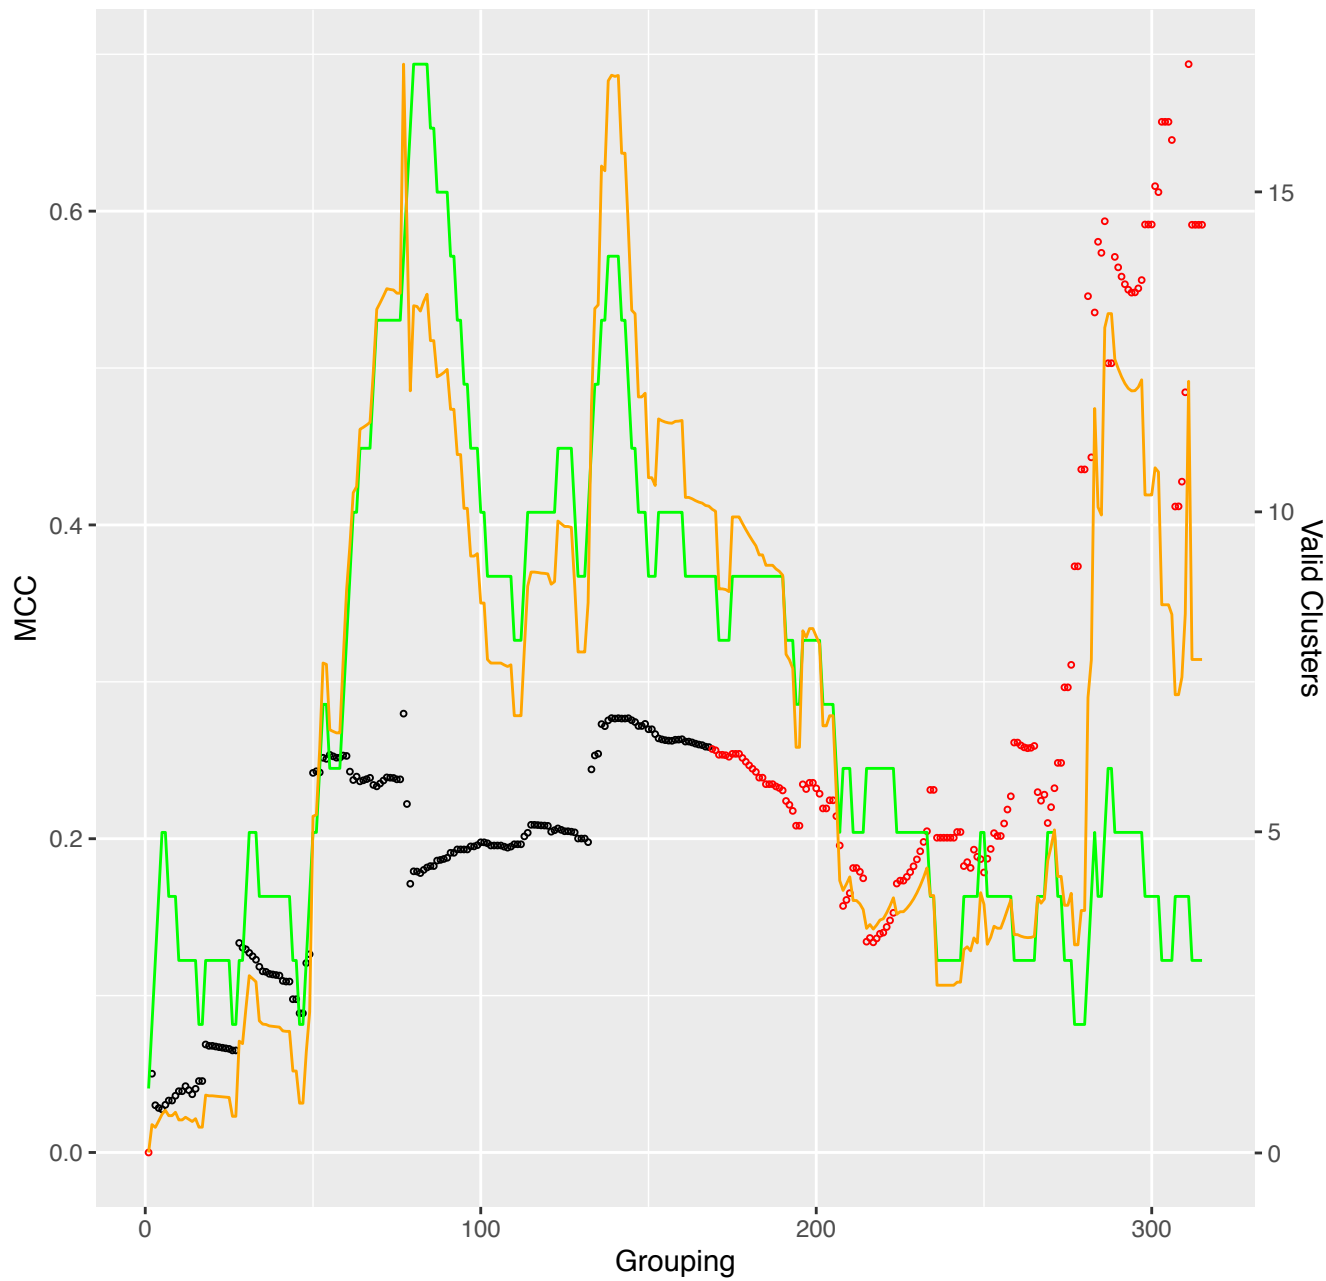

EBNA-3A\_type1 : grouping per country

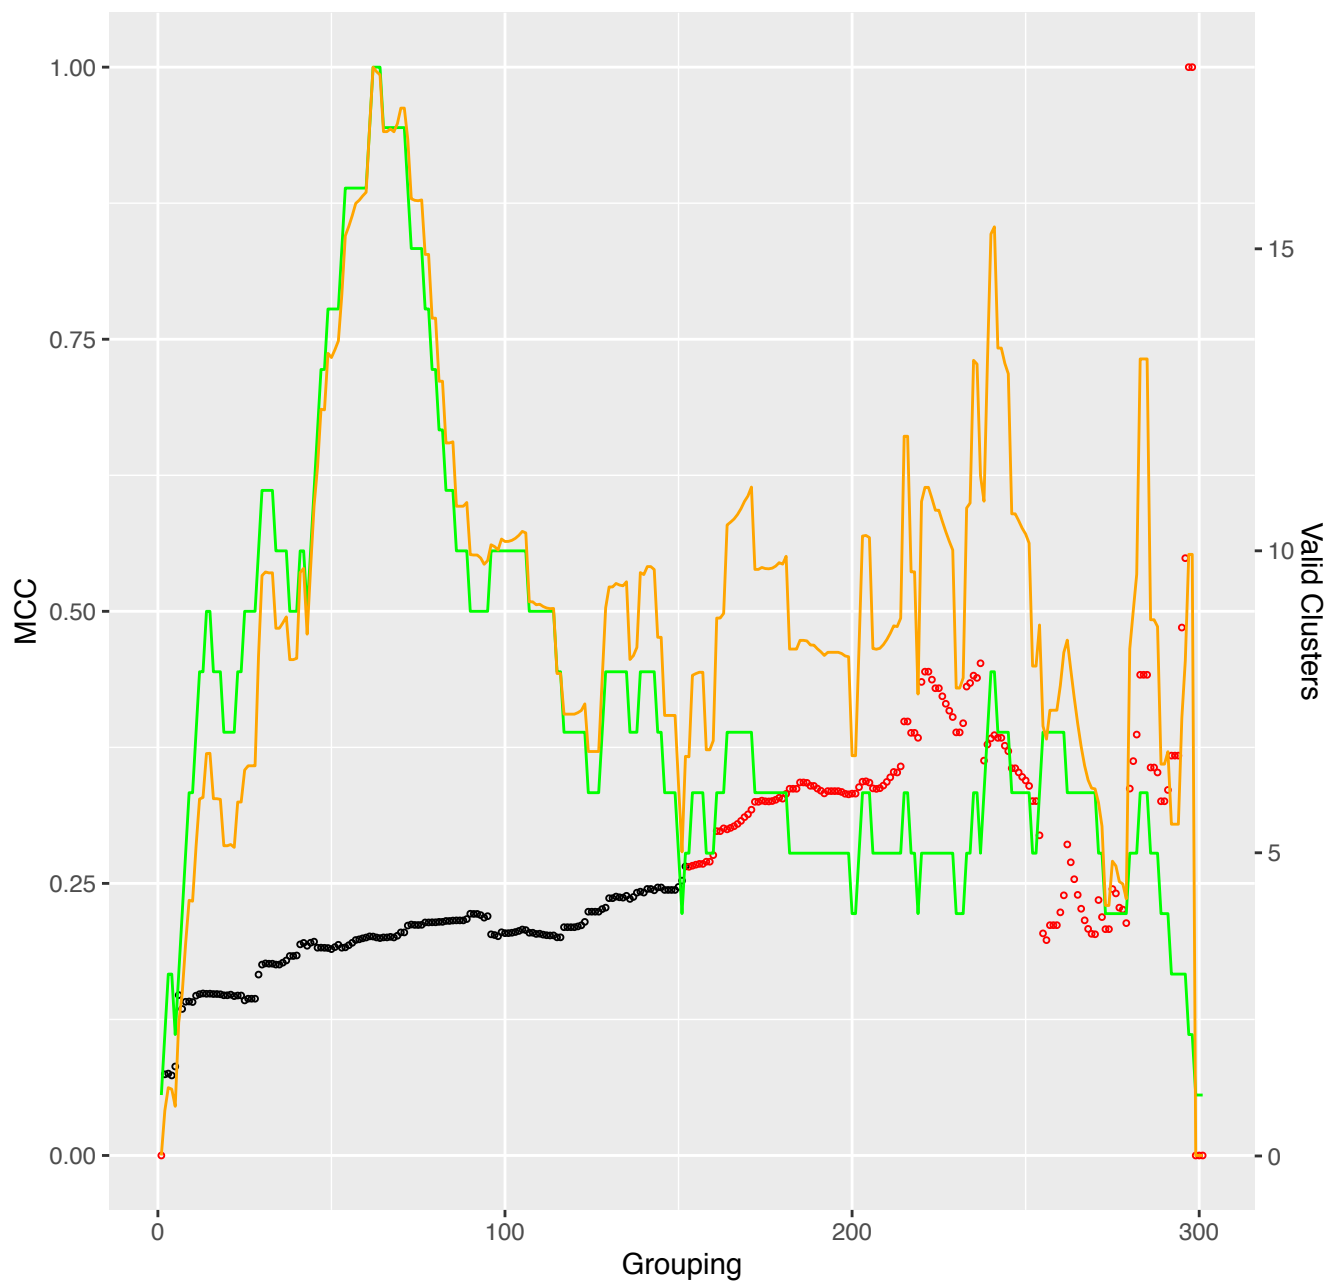



EBNA-3A\_type1 : grouping per continent

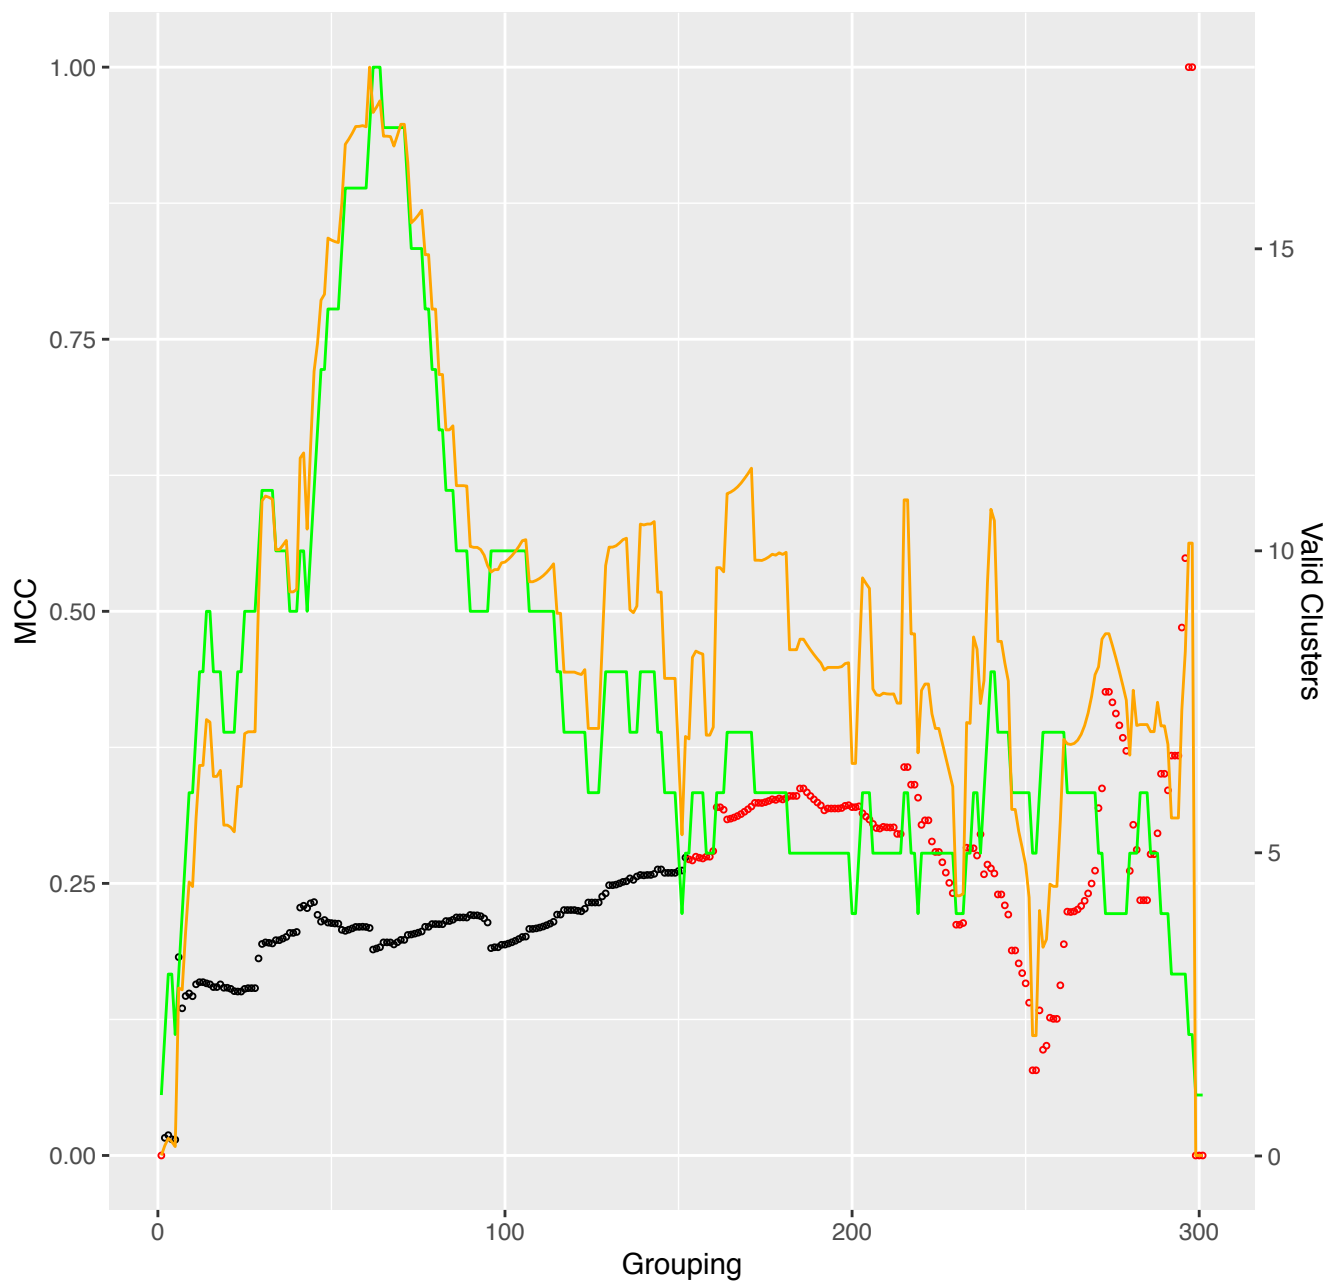

EBNA-3B : grouping per country

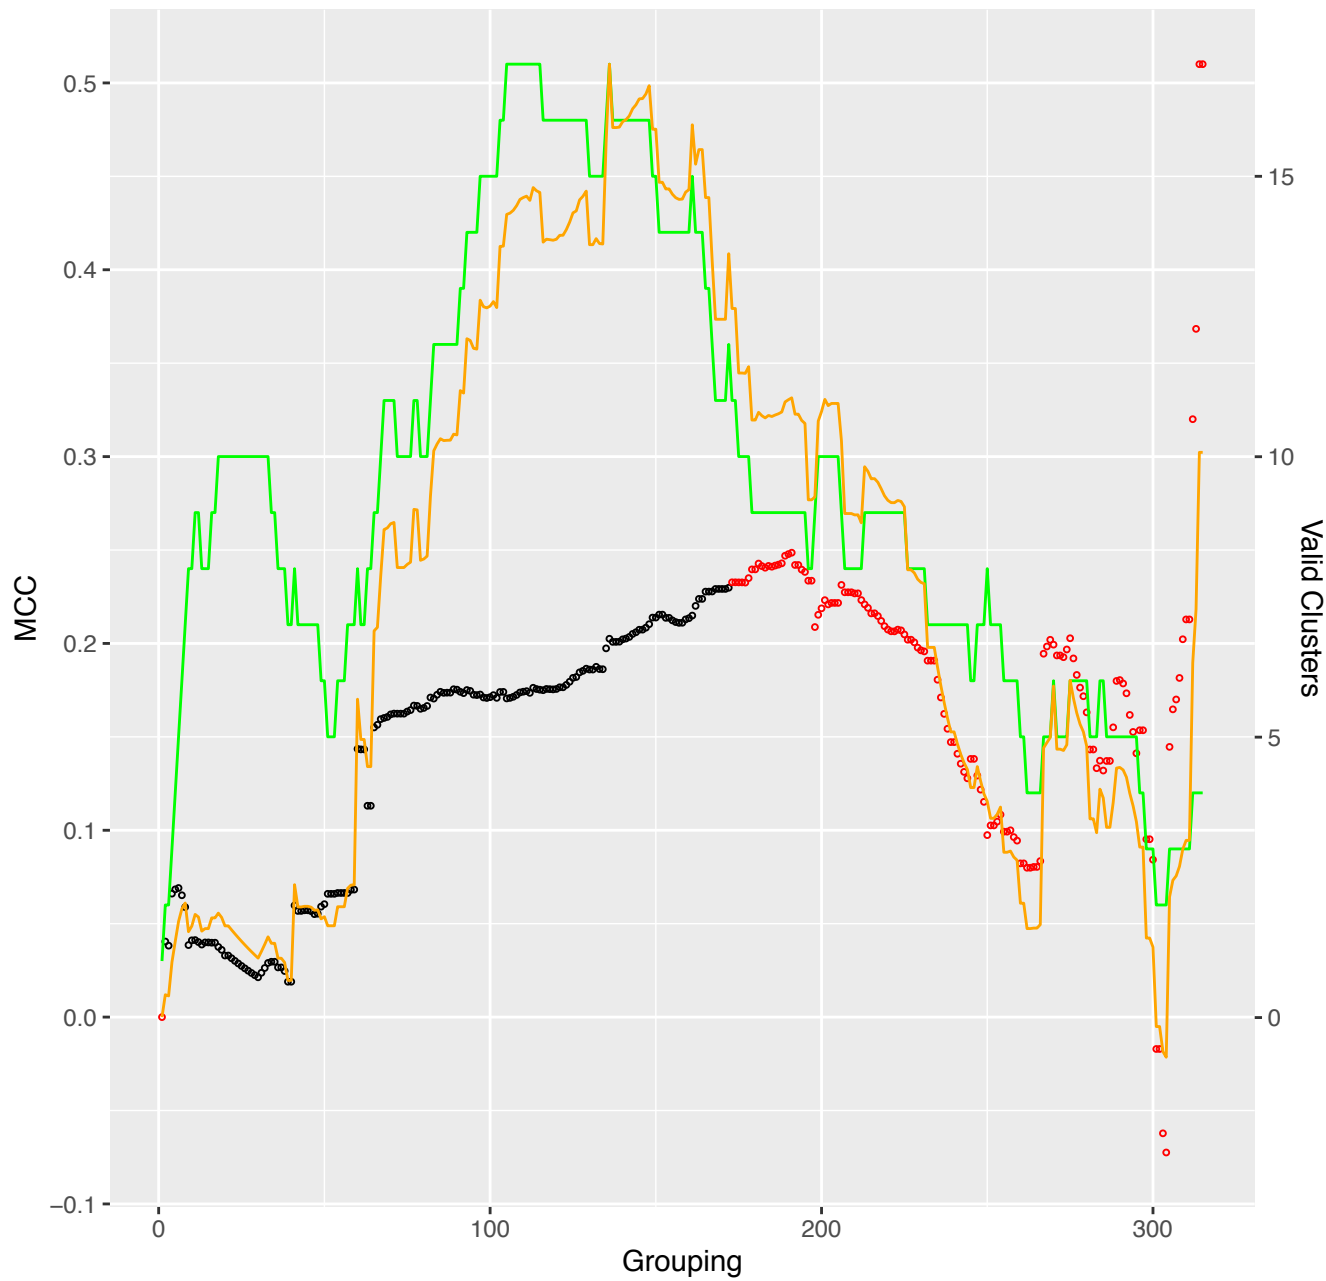

EBNA-3B : grouping per continent

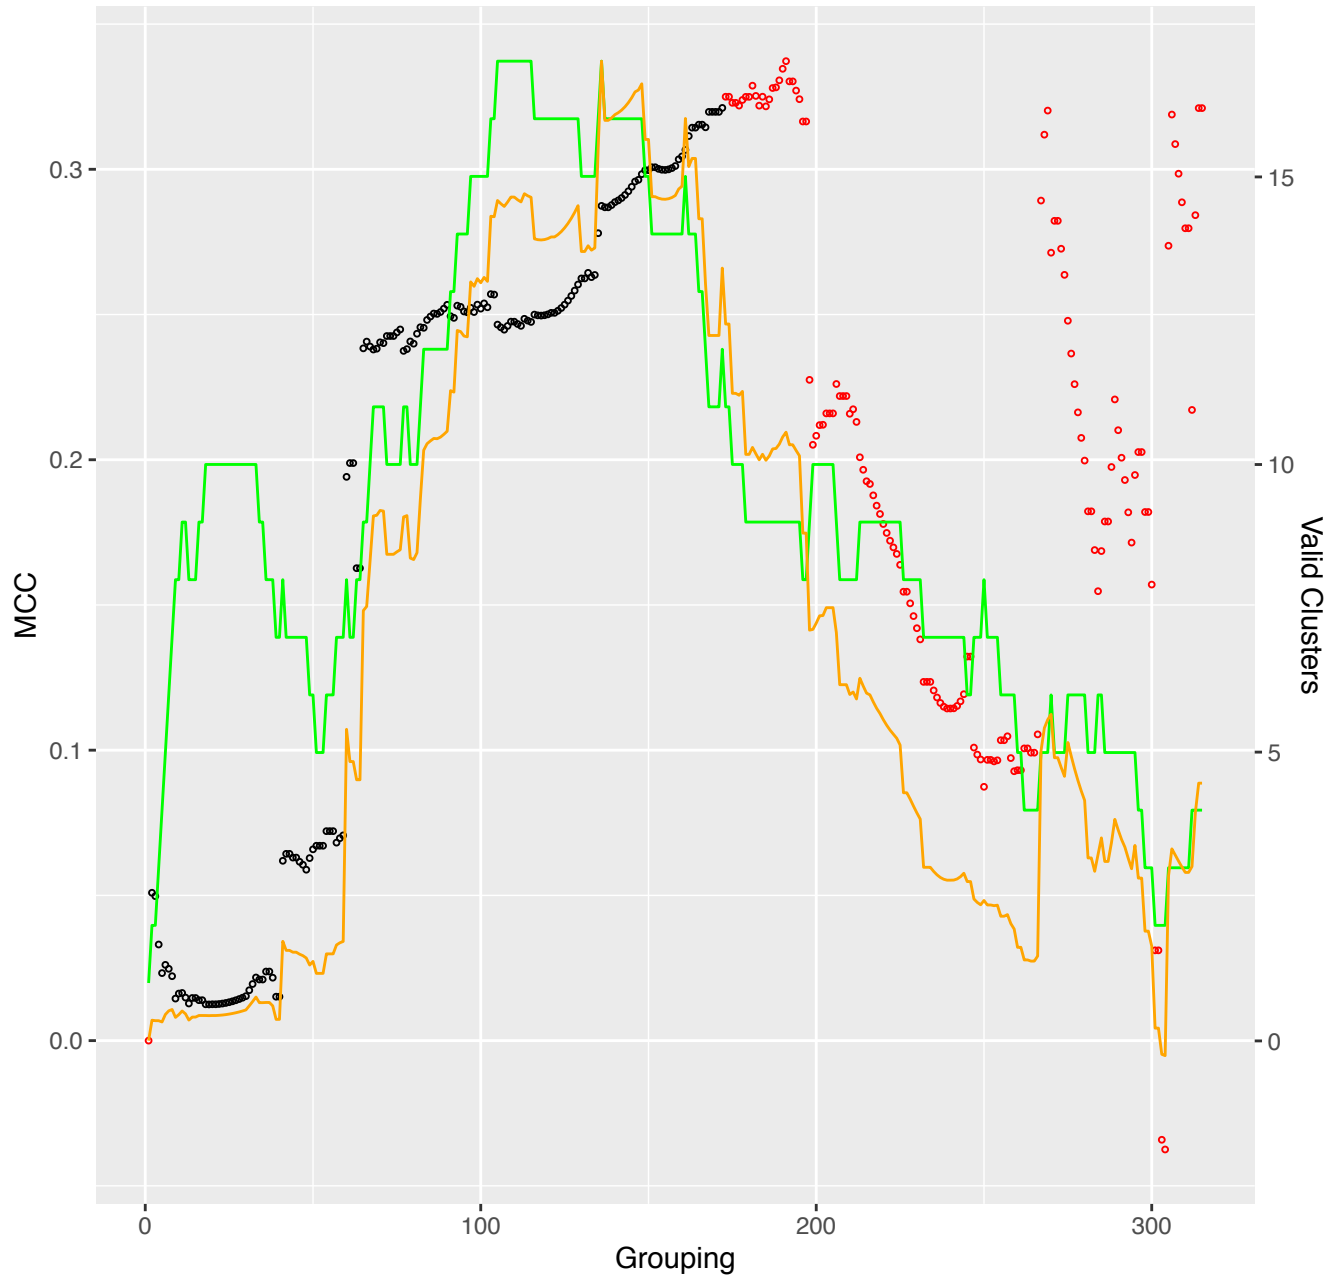

EBNA-3B\_type1 : grouping per country

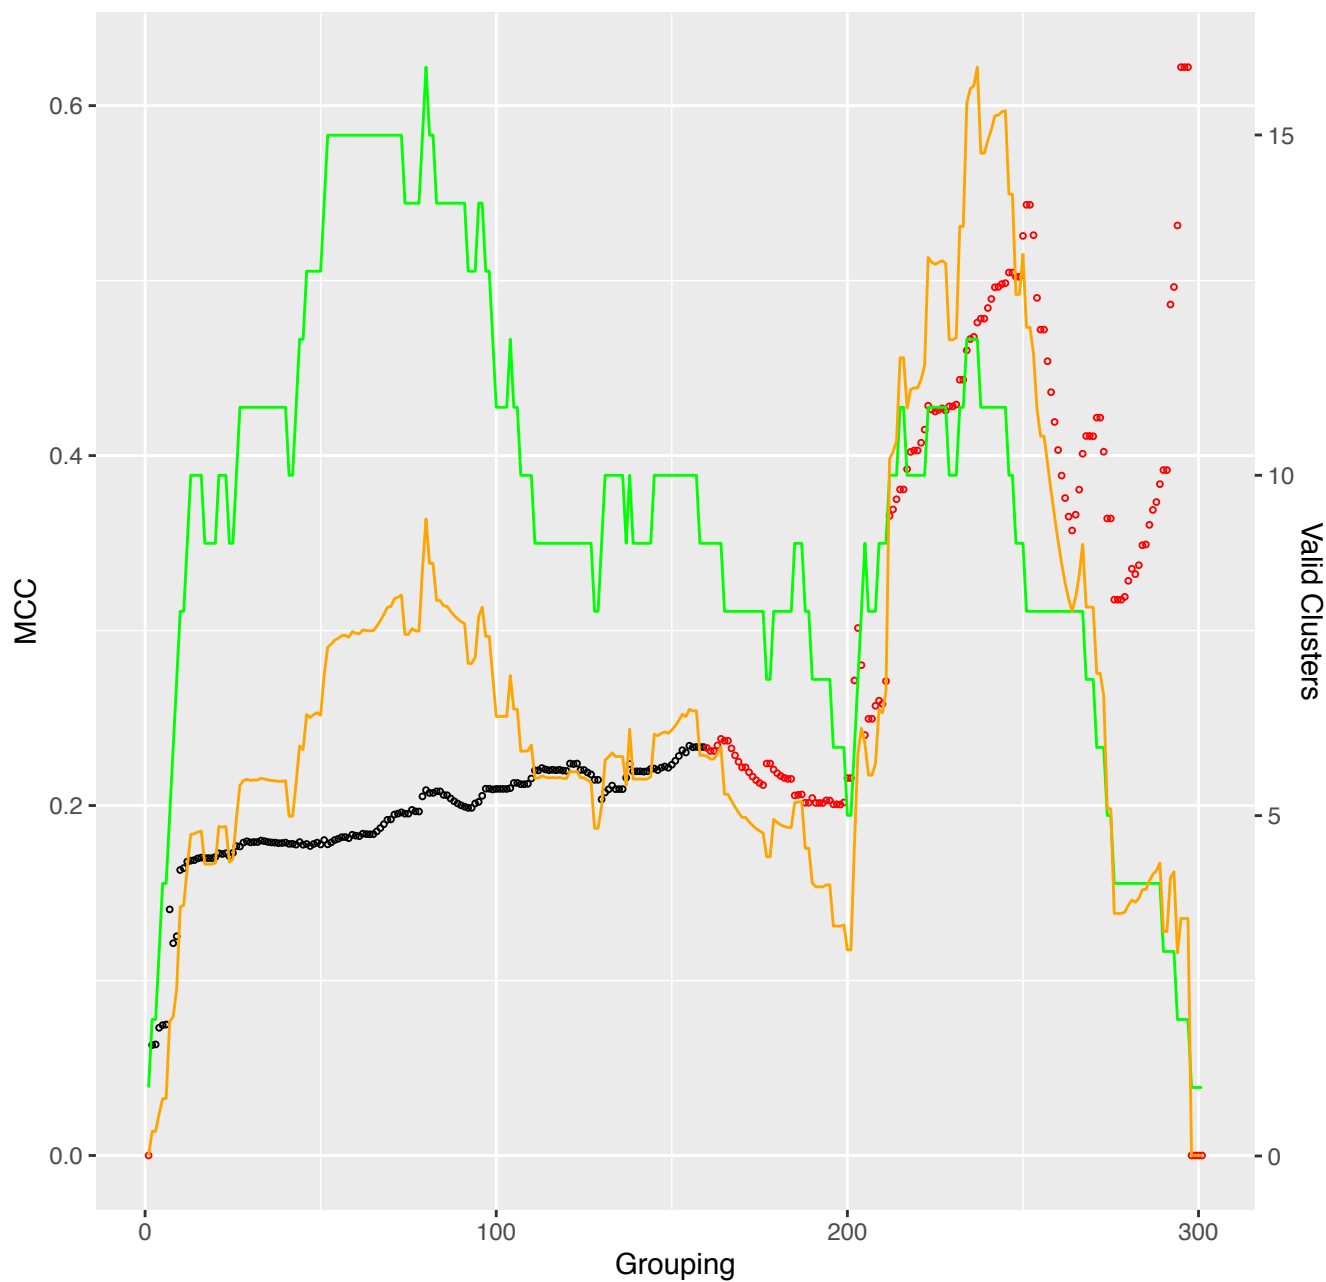

EBNA-3B\_type1 : grouping per continent

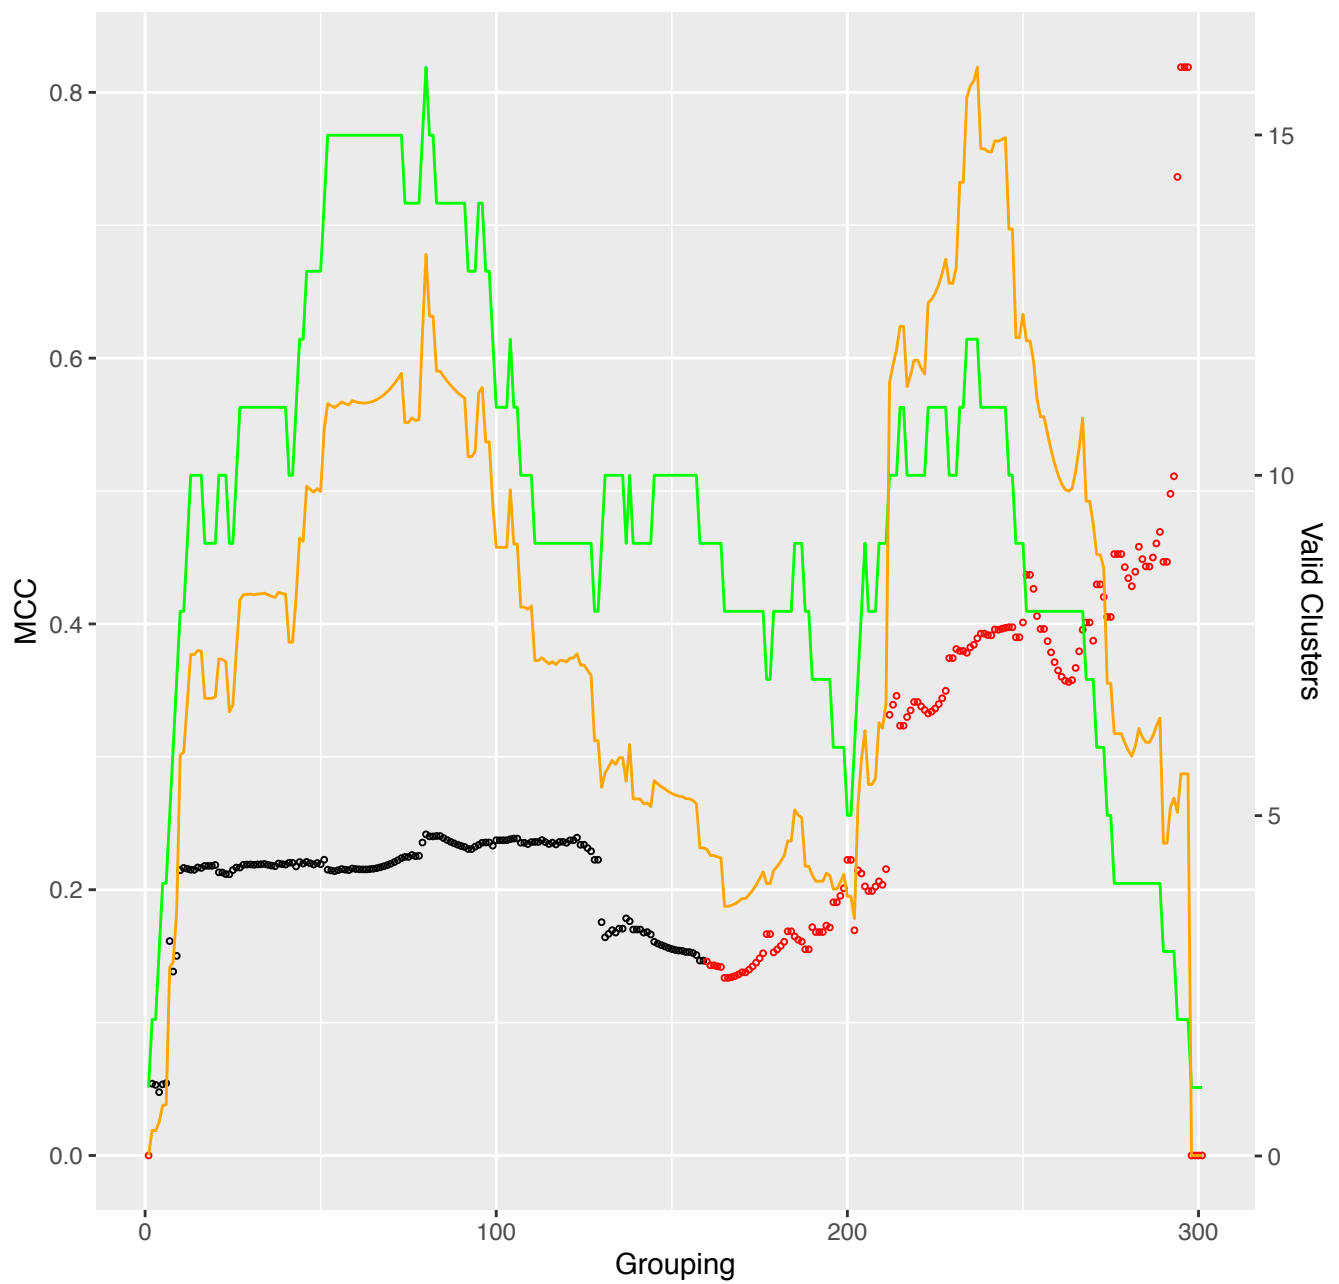

EBNA-3C : grouping per country

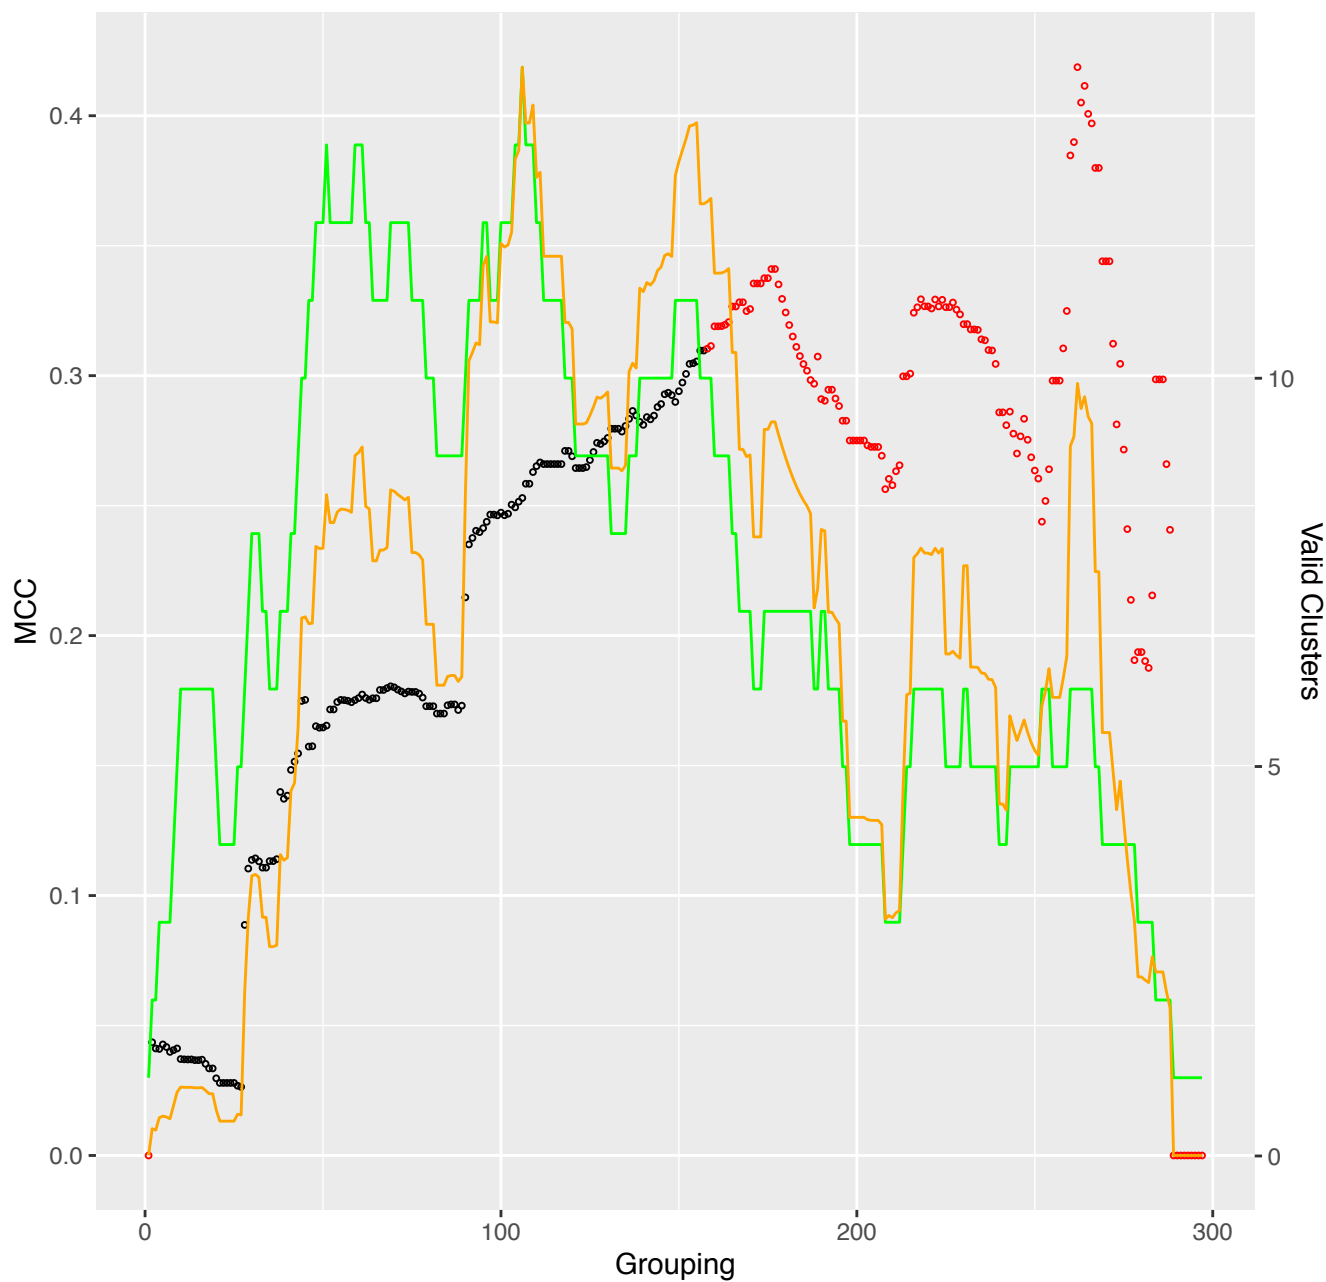

EBNA-3C : grouping per continent

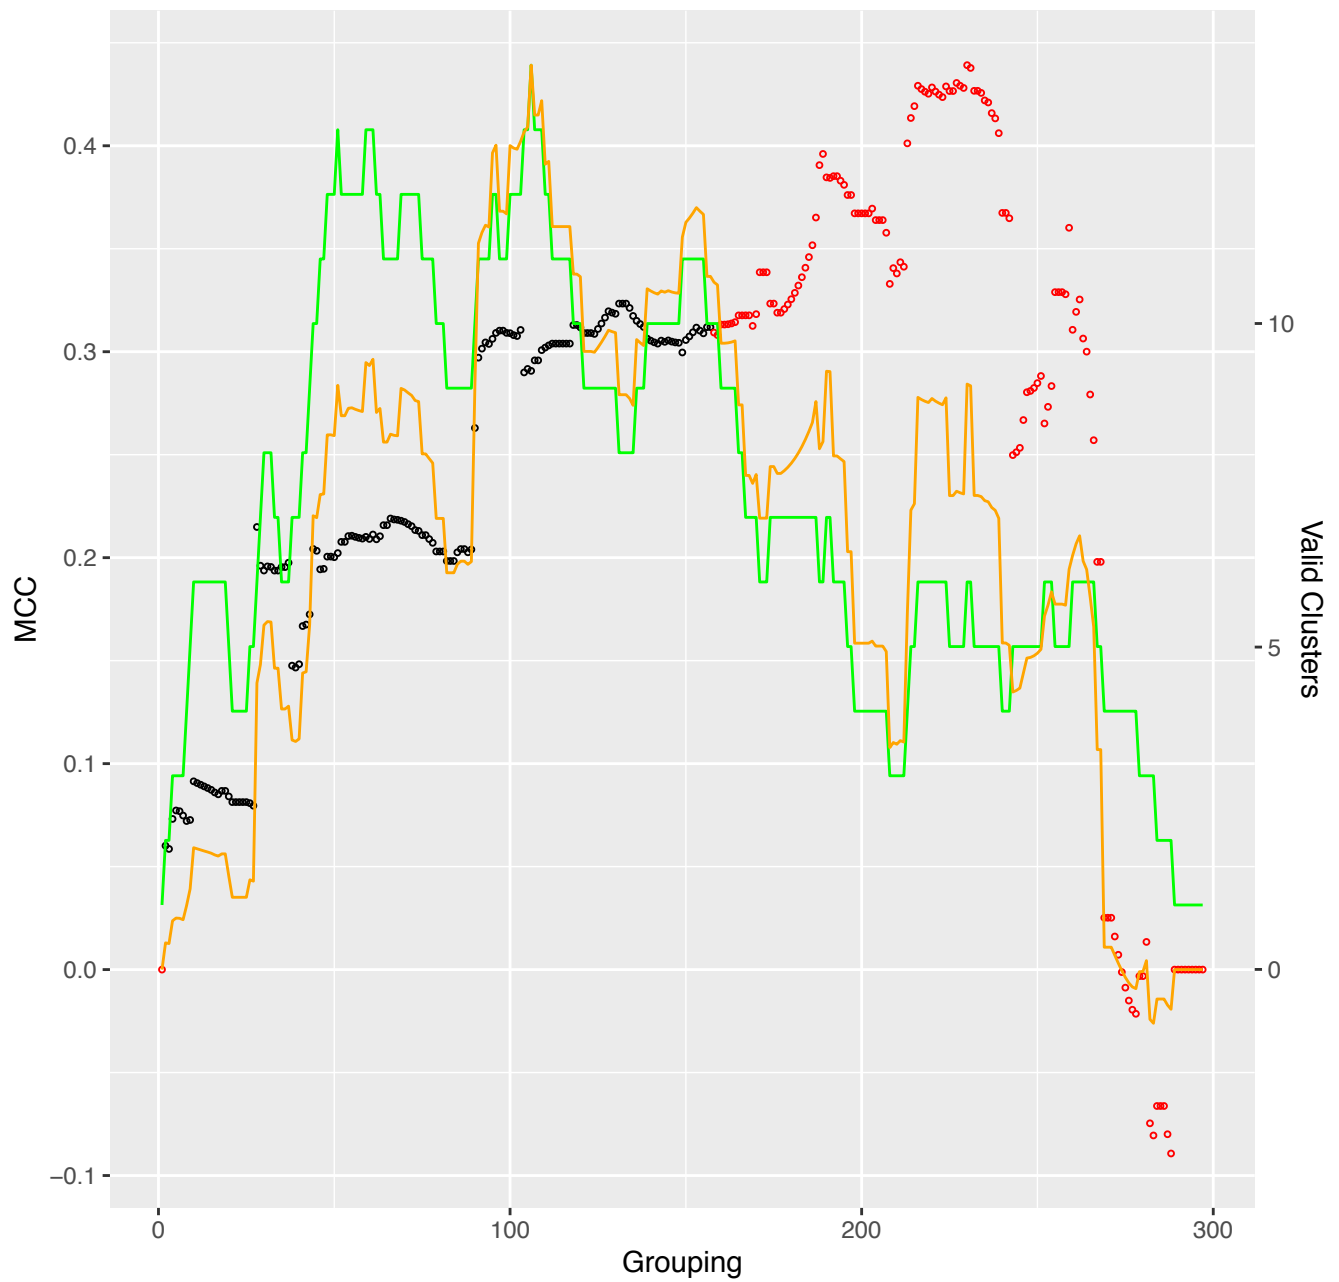

EBNA-3C\_type1 : grouping per country

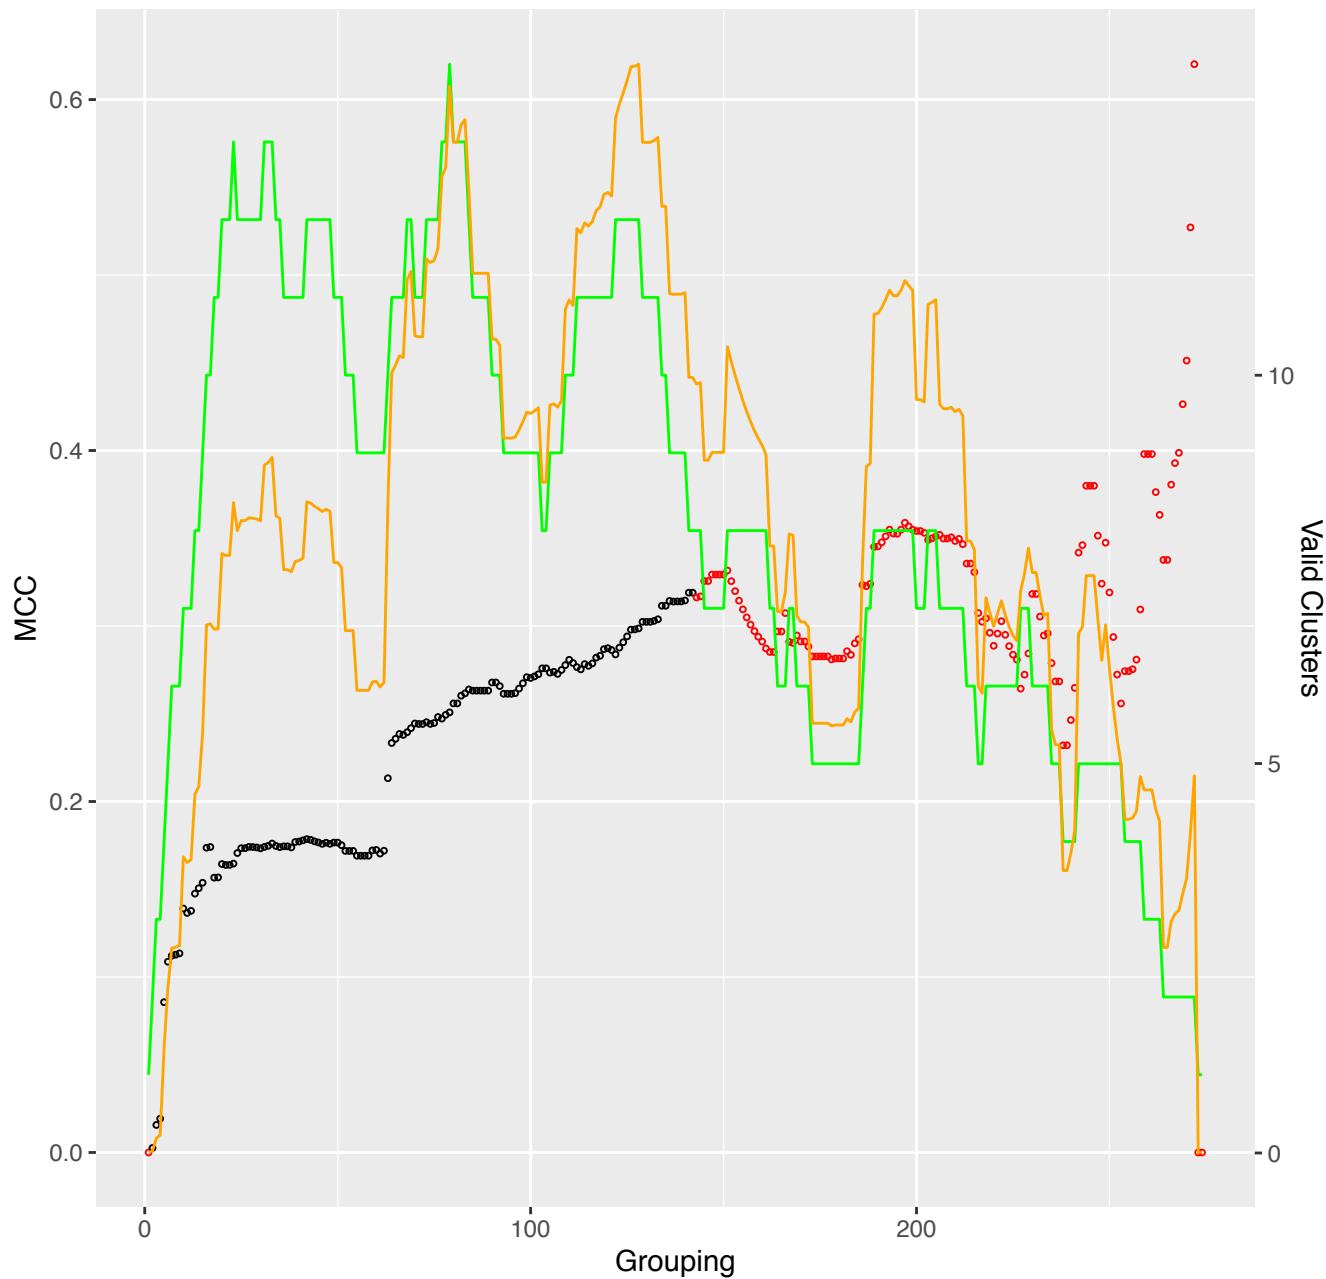



EBNA-3C\_type1 : grouping per continent

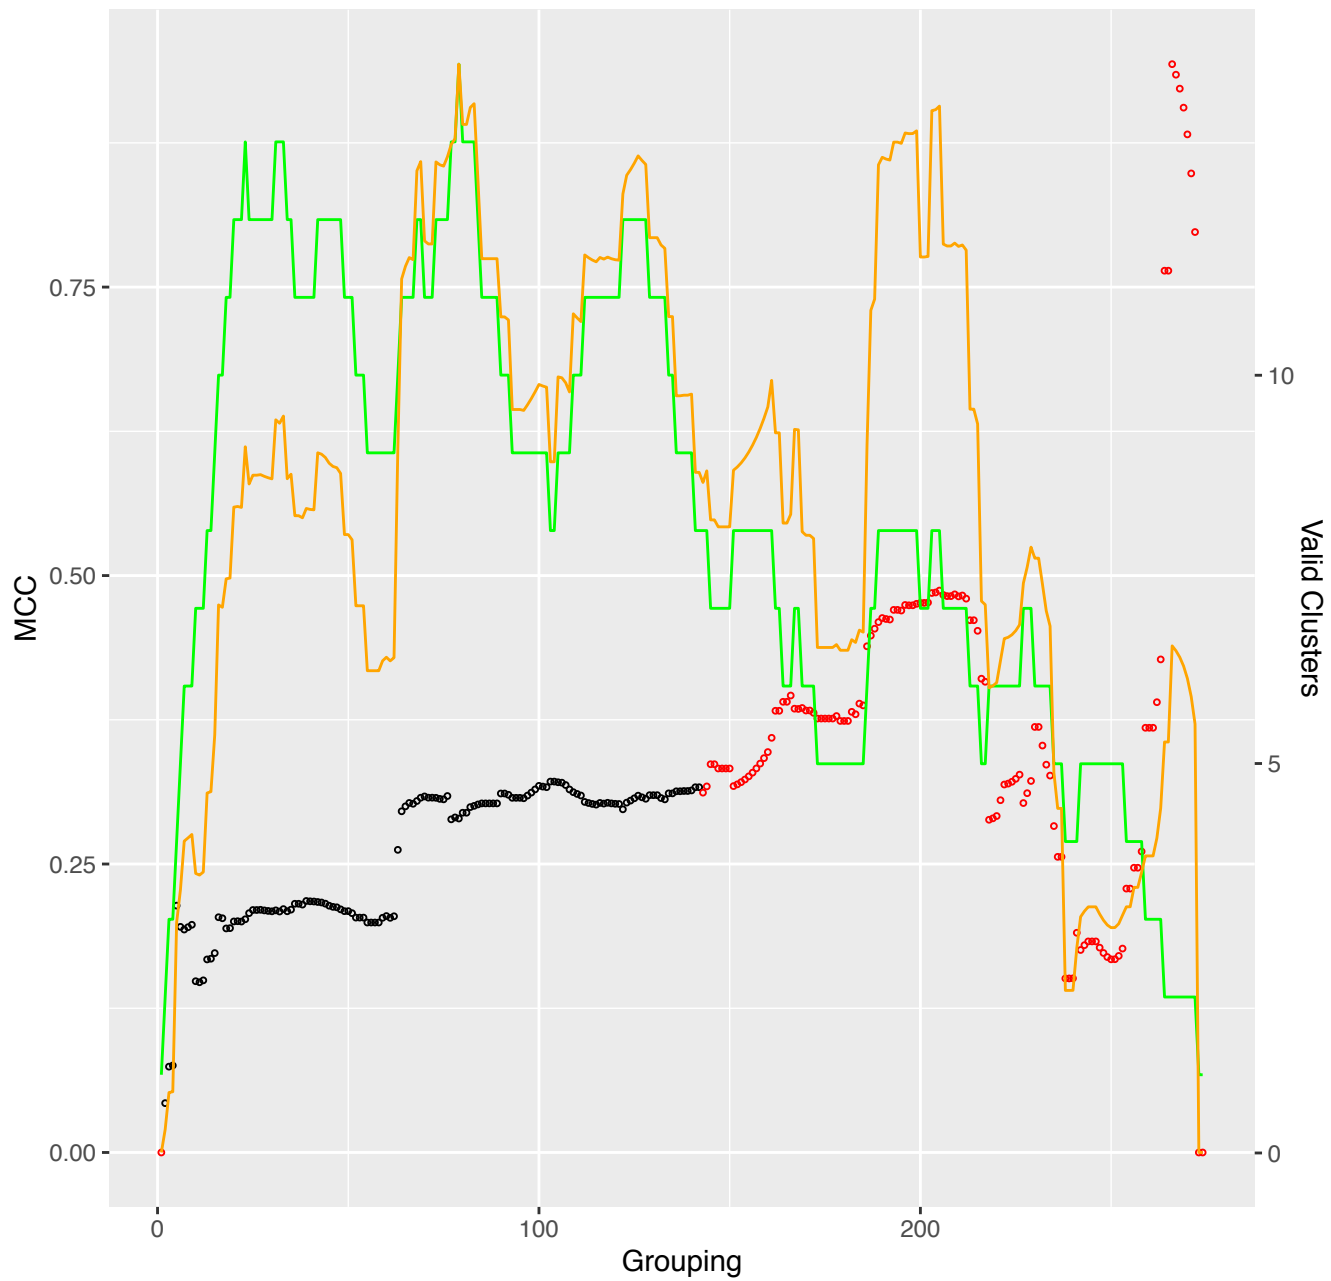

LMP-2A : grouping per country

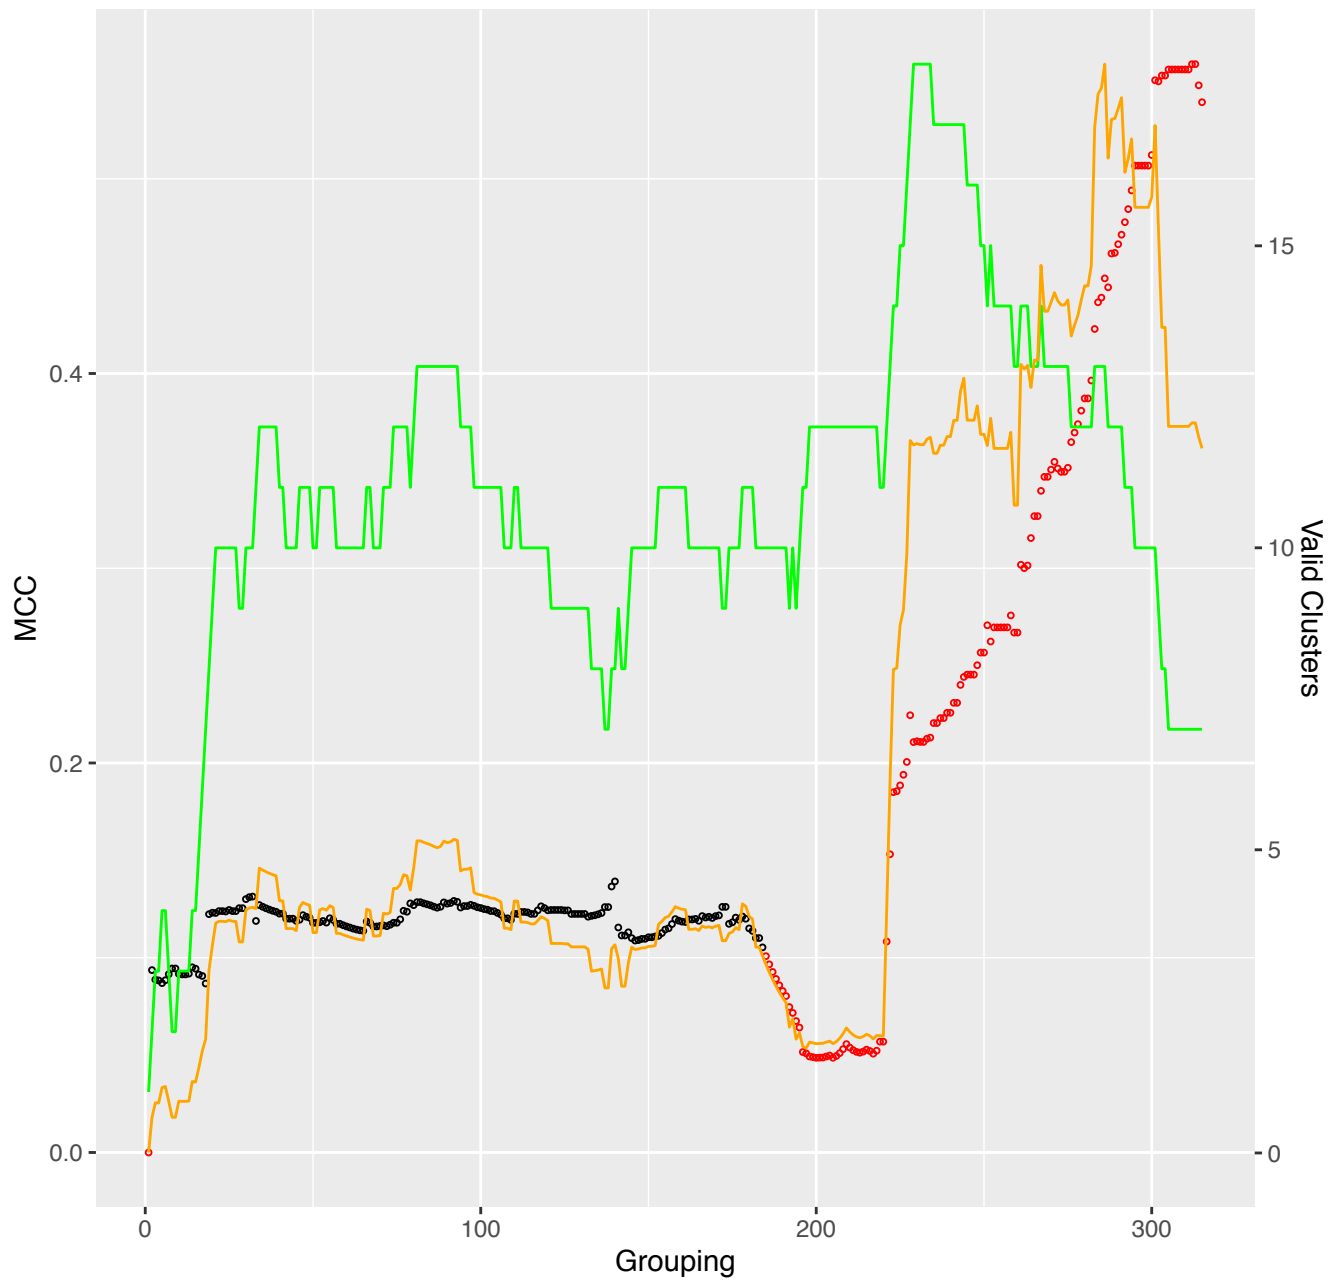

LMP-2A : grouping per continent

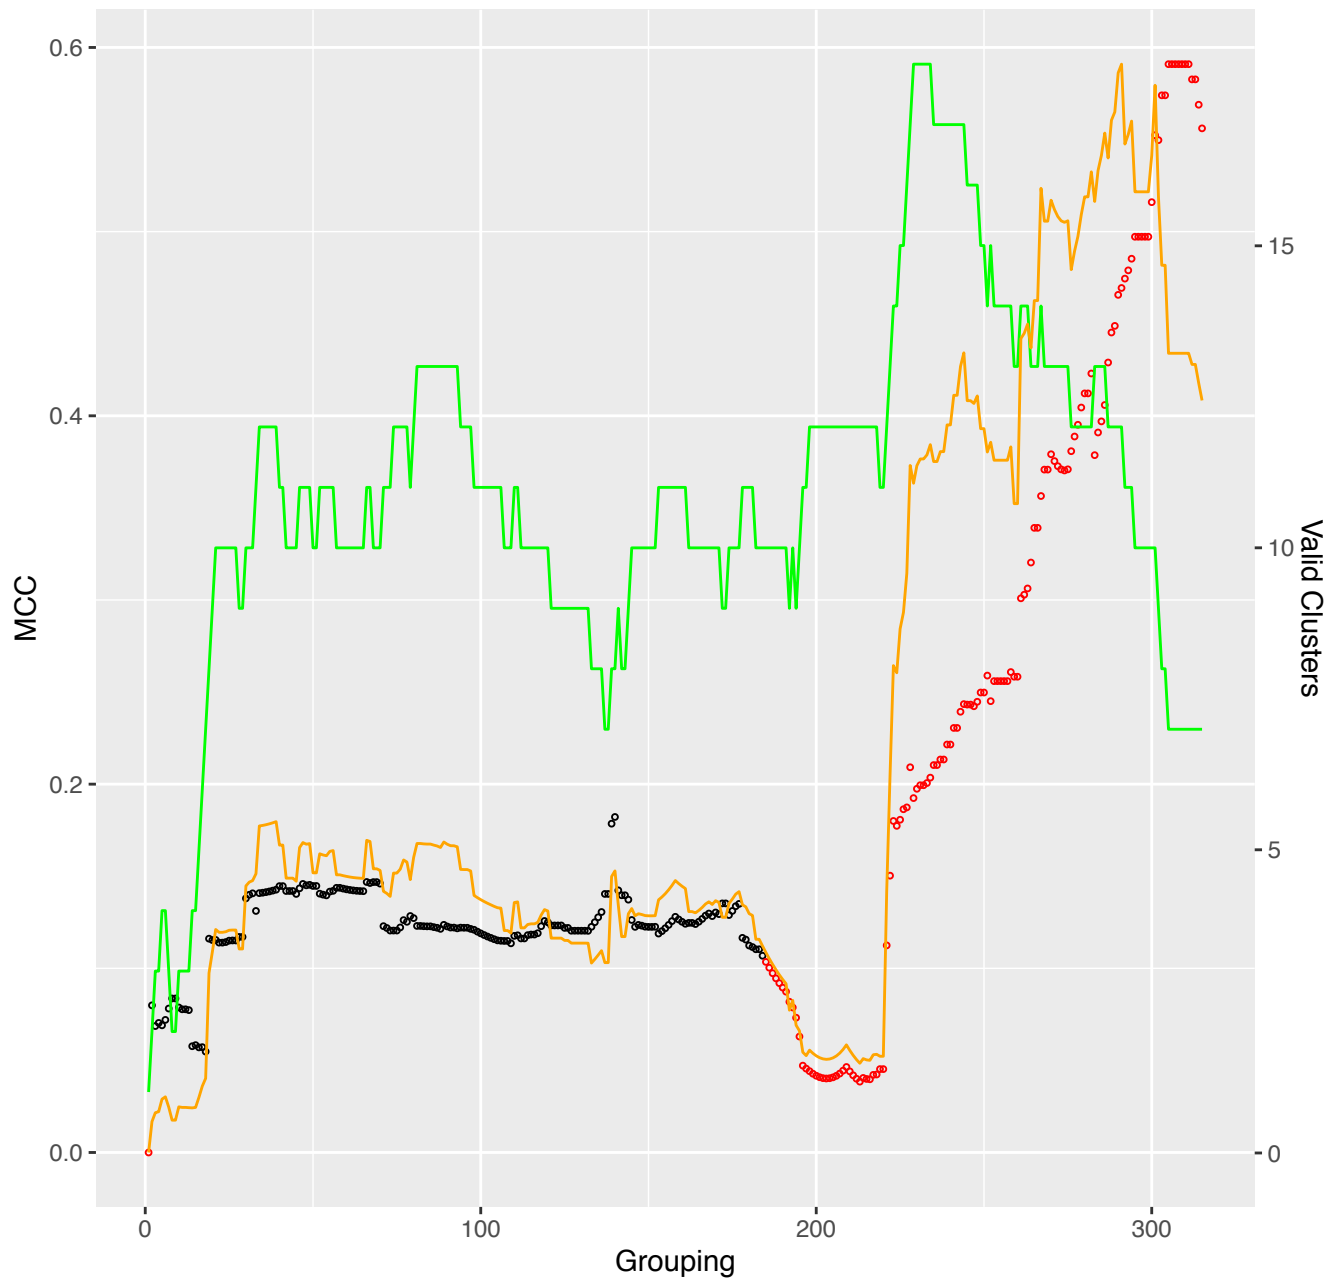

Supertree : grouping per country

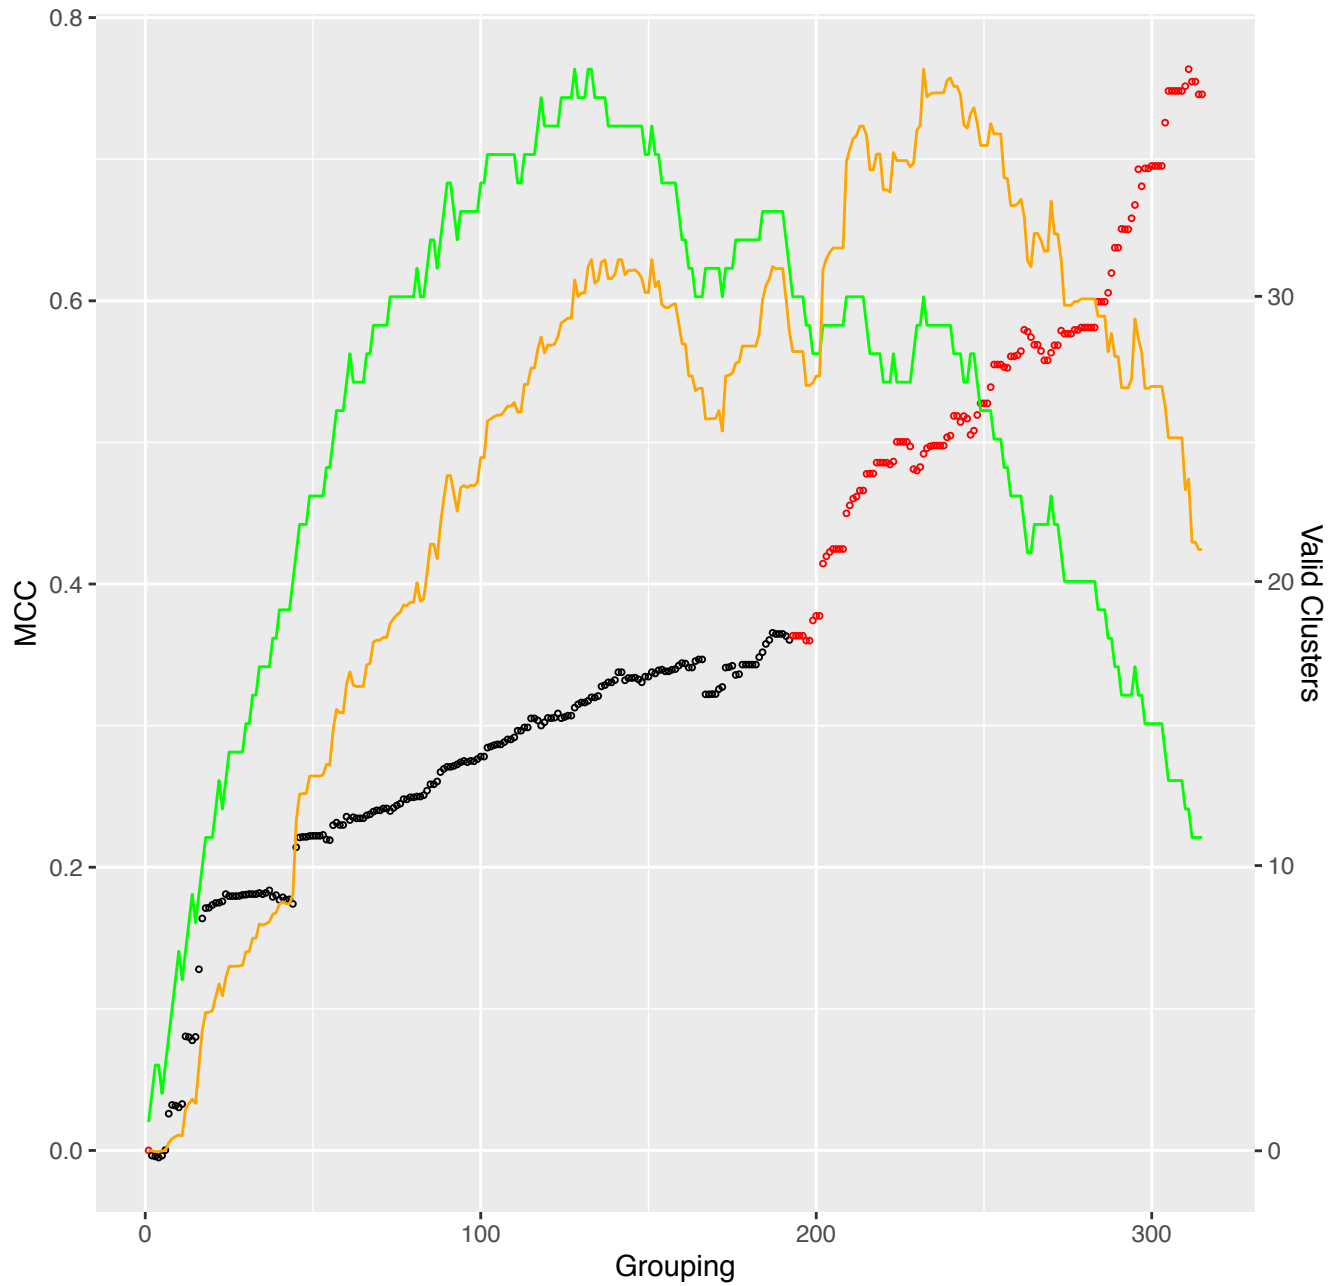

Supertree : grouping per continent

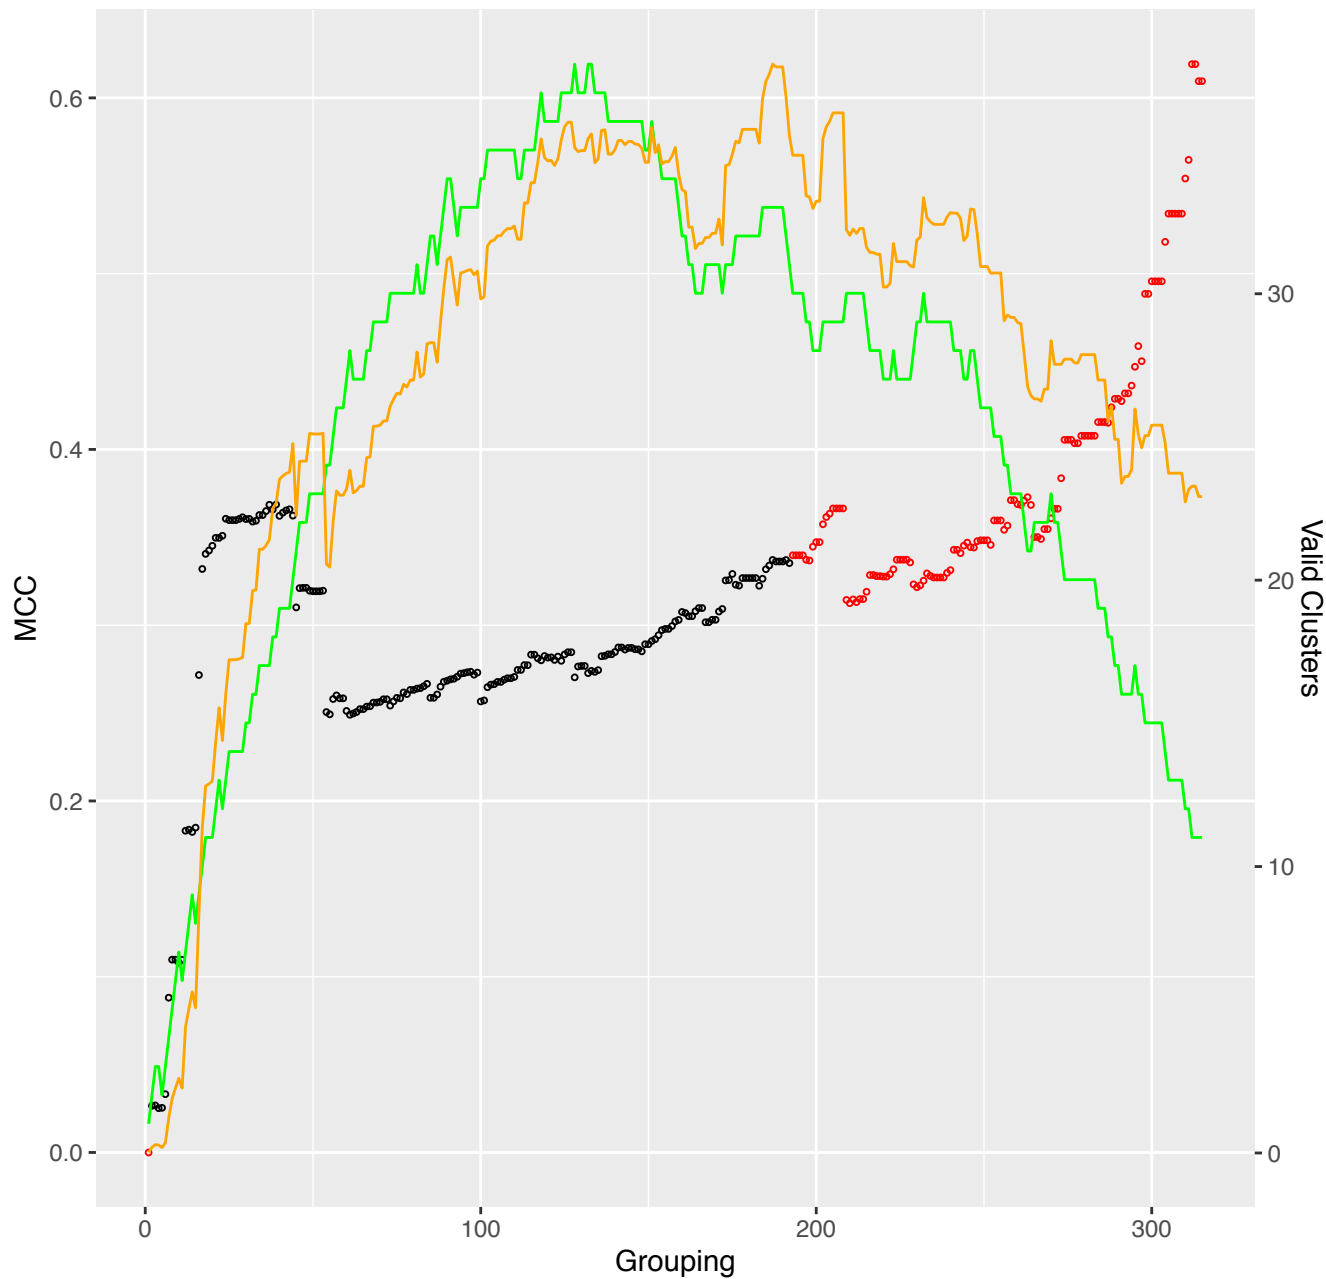

Supertree\_type1 : grouping per country

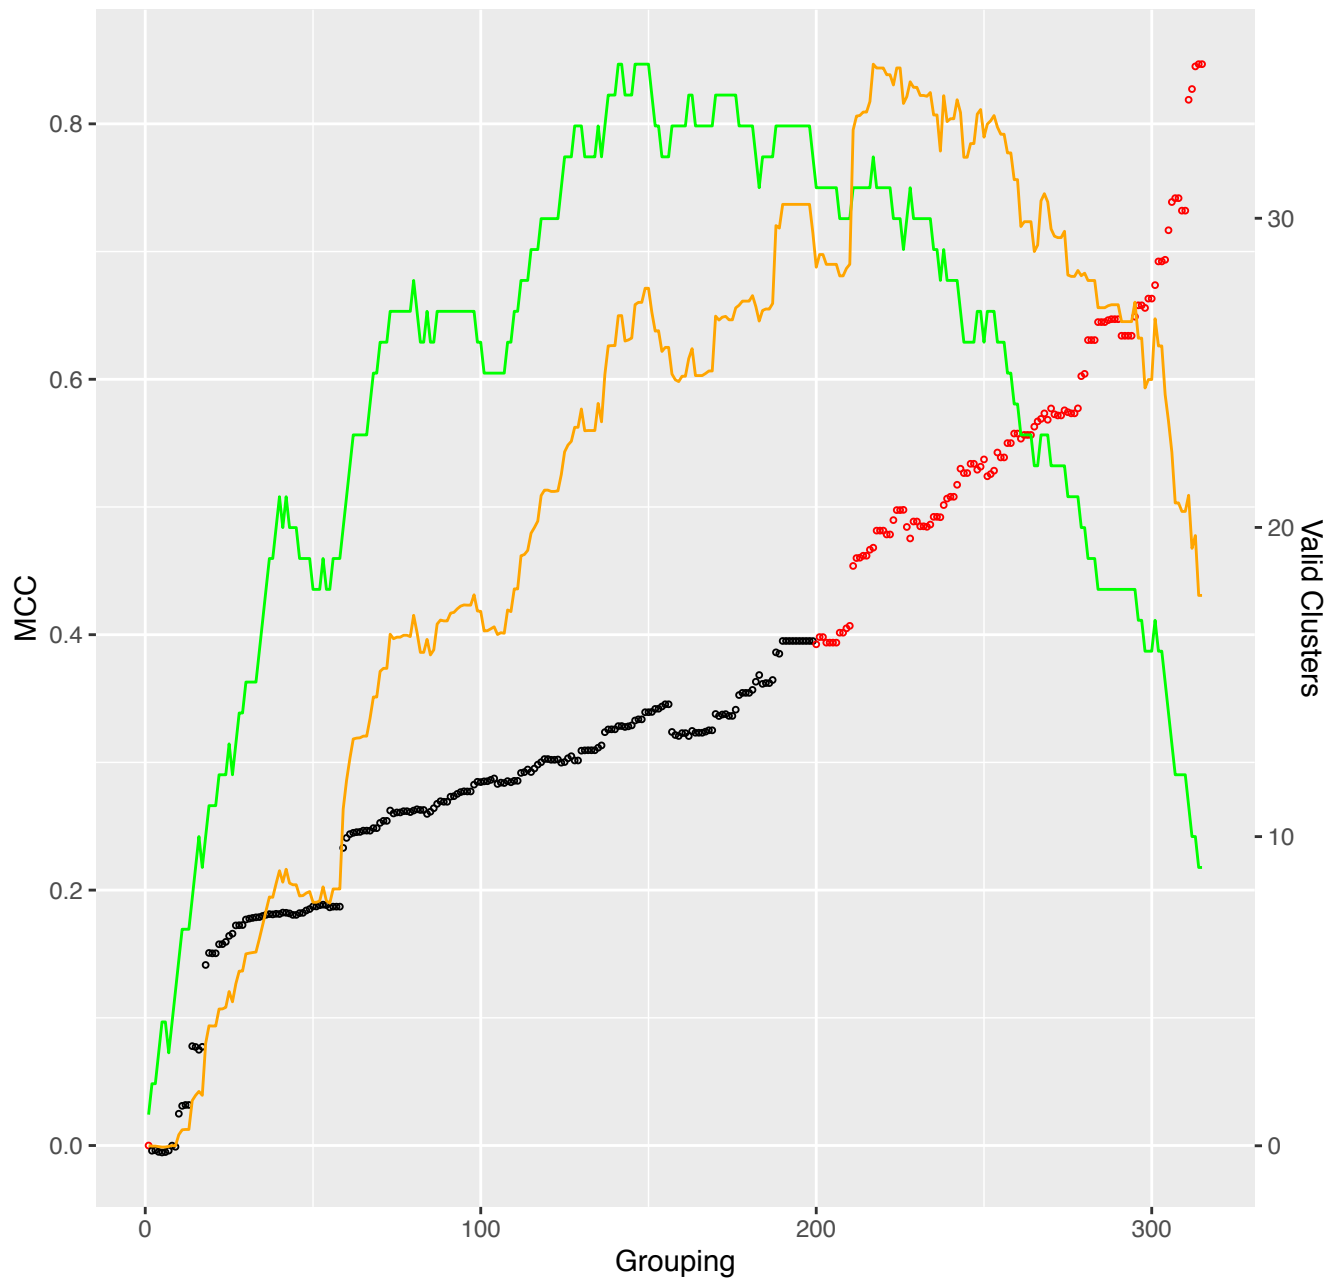

Supertree\_type1 : grouping per continent

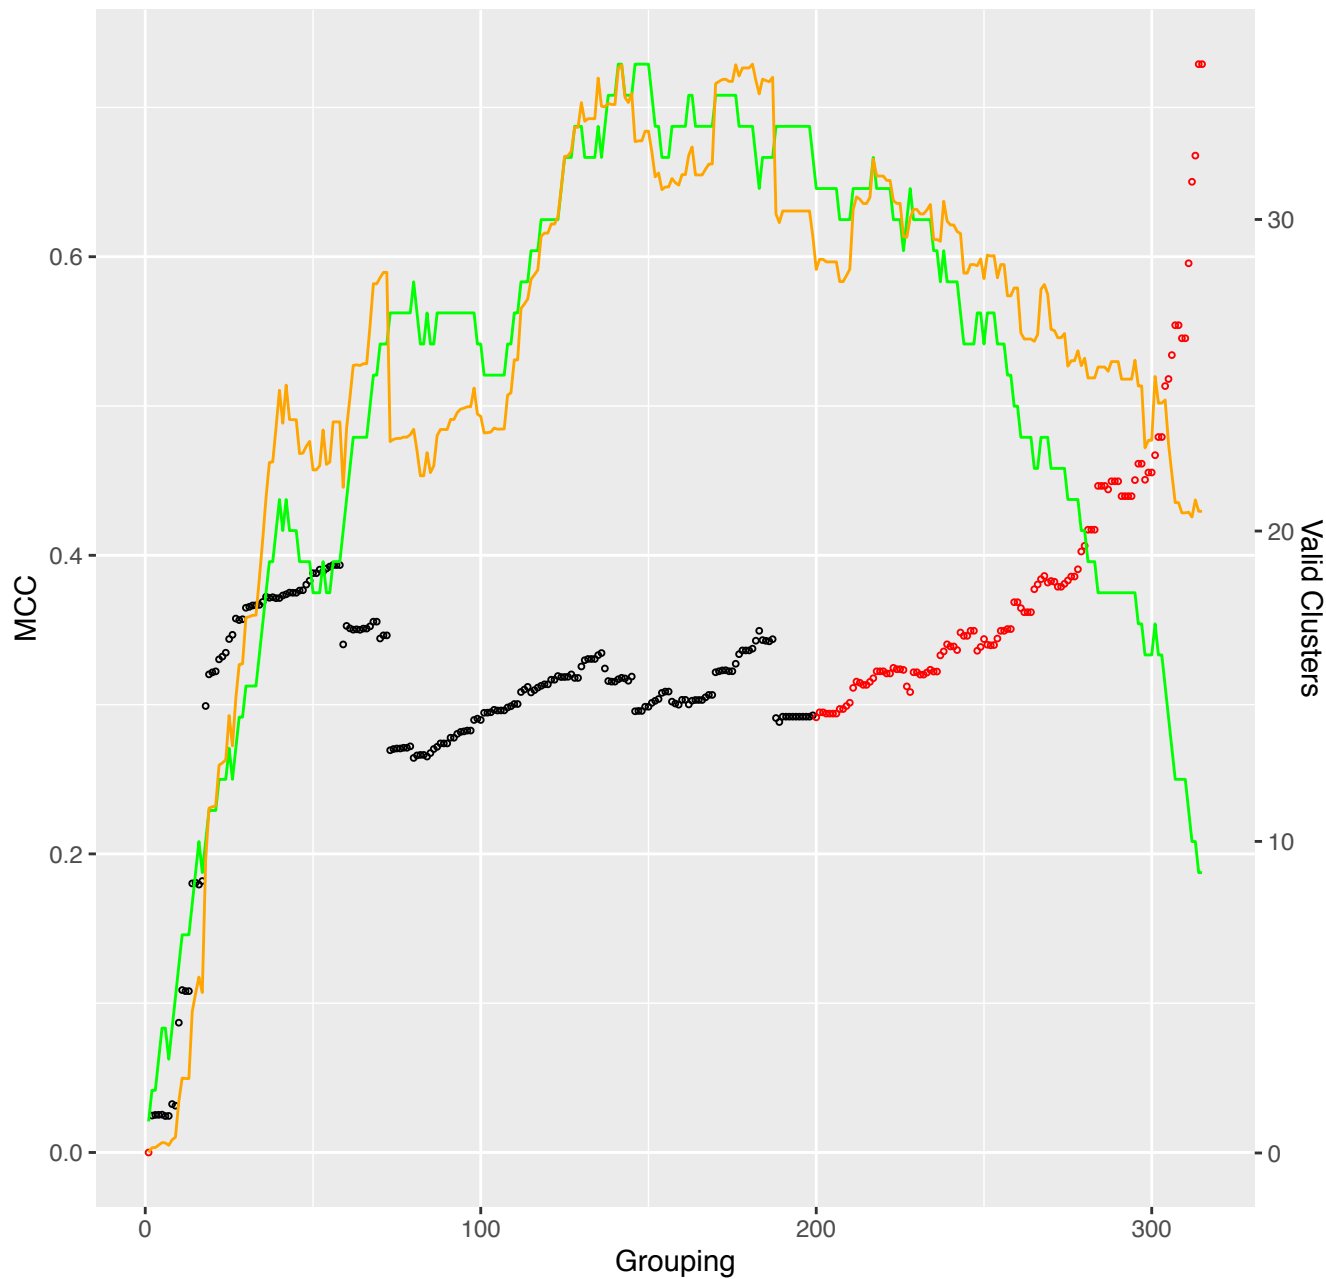

Concatenated tree : grouping per country

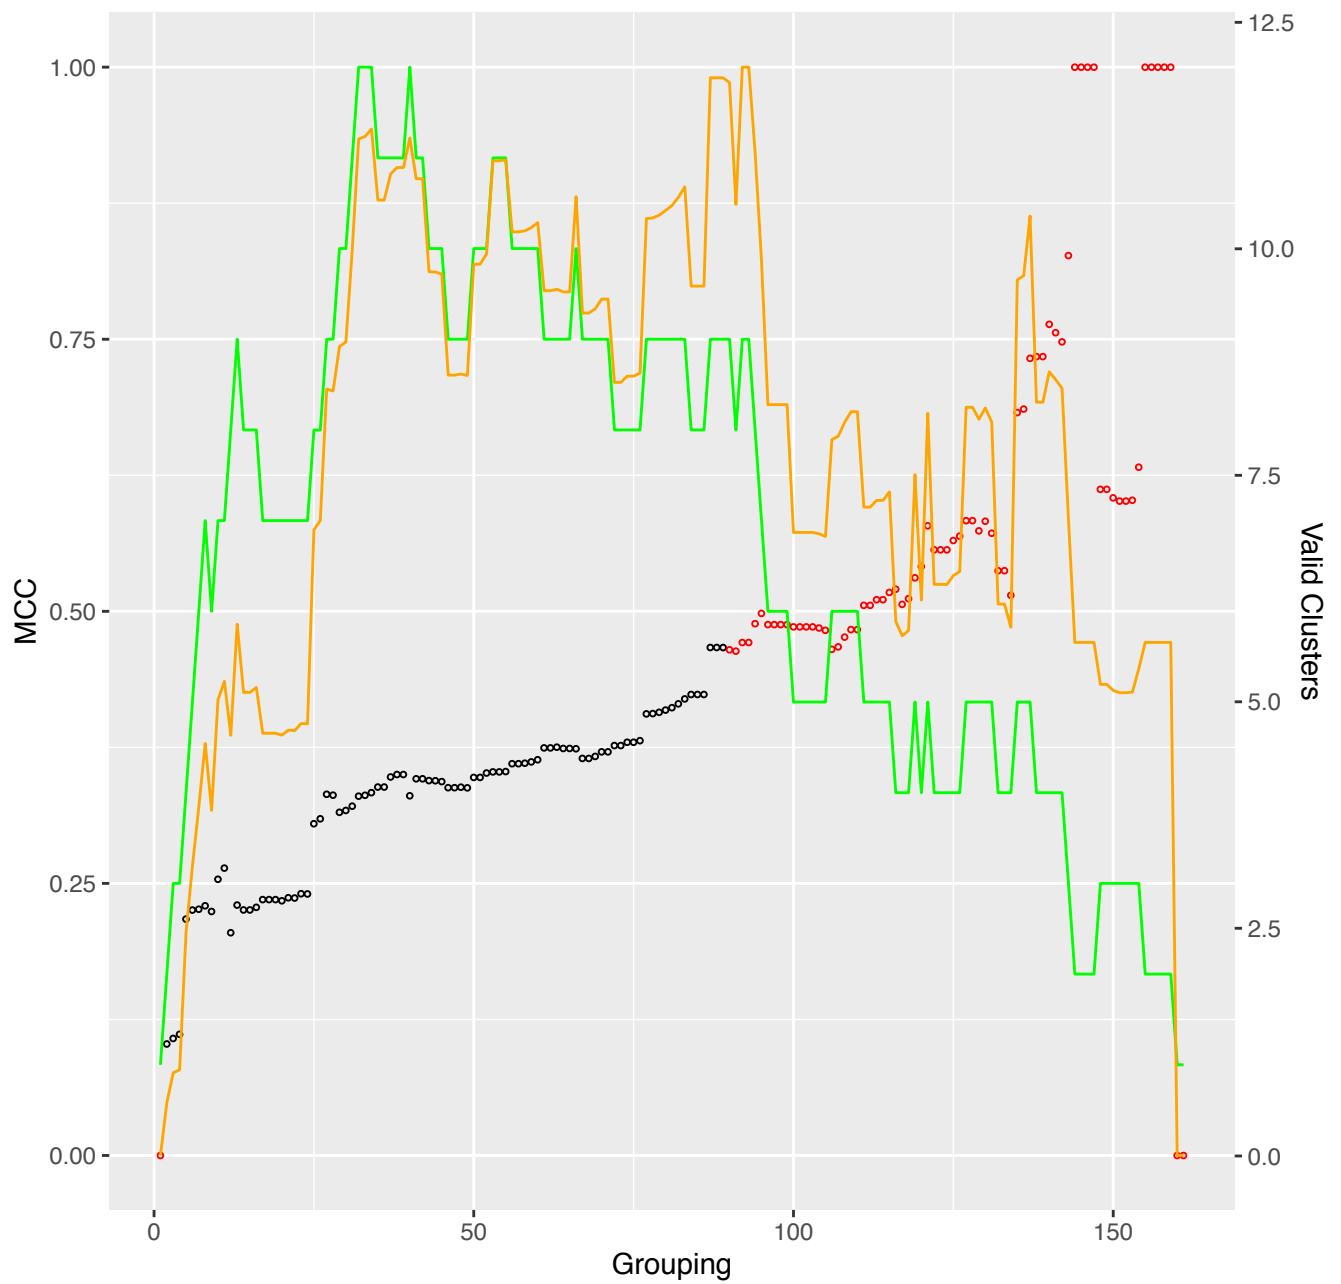



Concatenated tree : grouping per continent

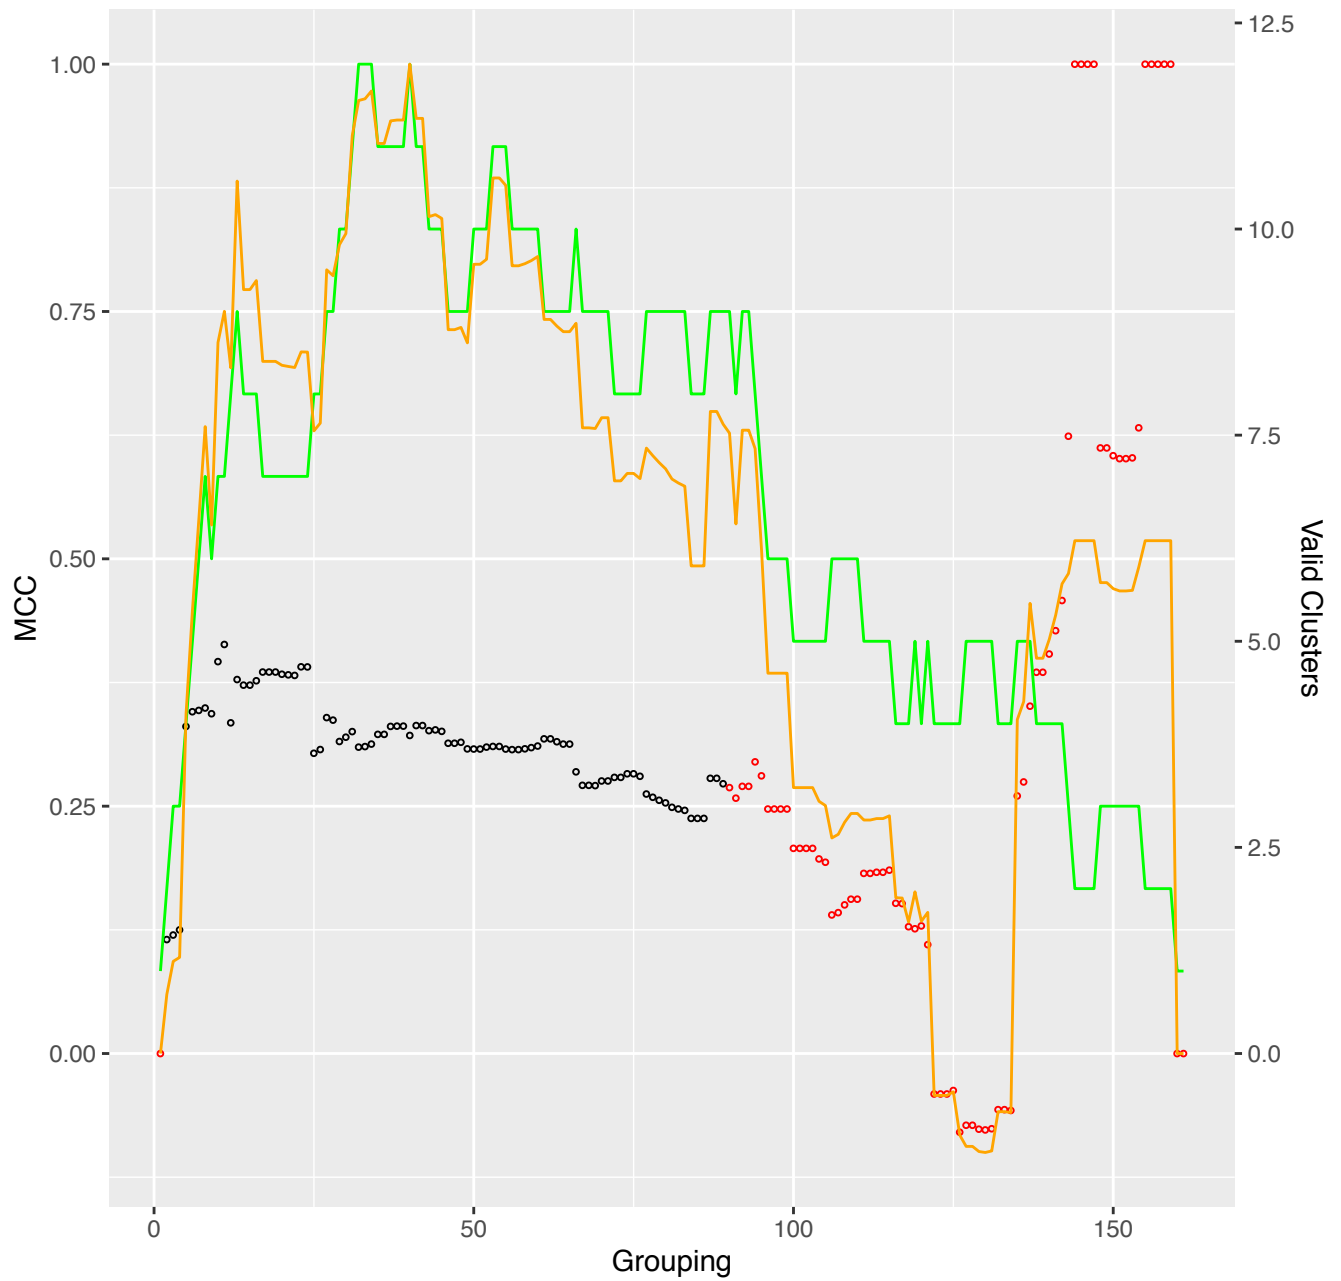

Supertree (conatenated tree isolates) : grouping per country

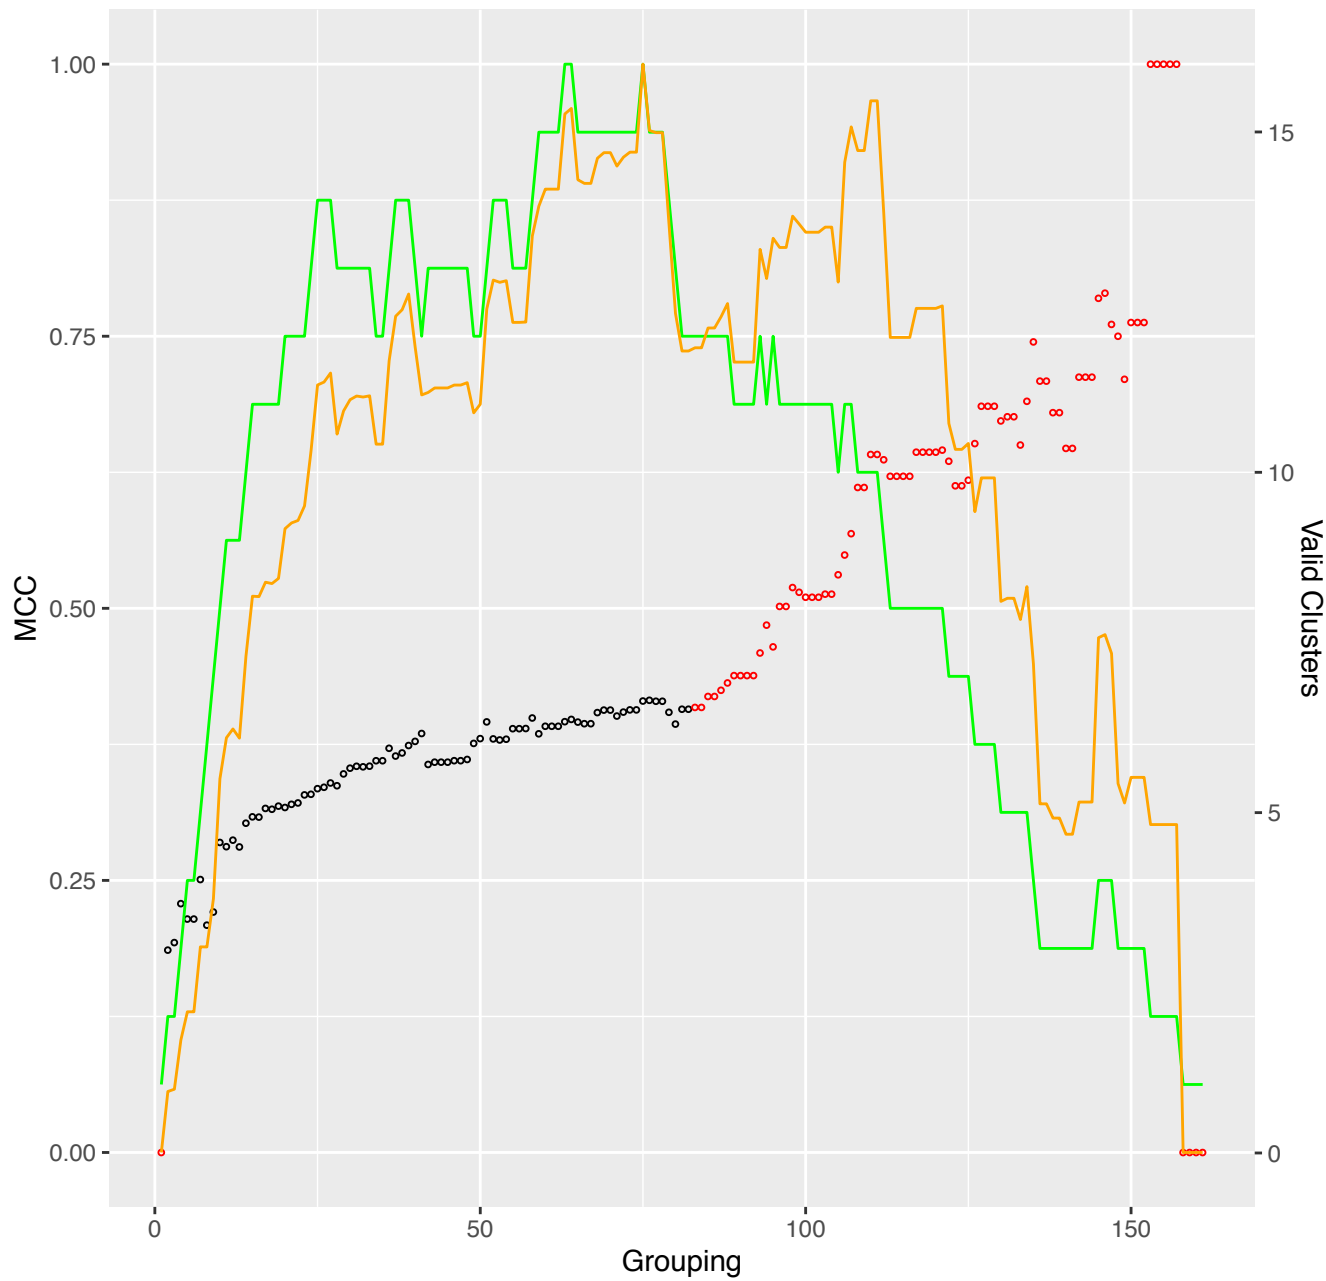

Supertree (conatenated tree isolates) : grouping per continent

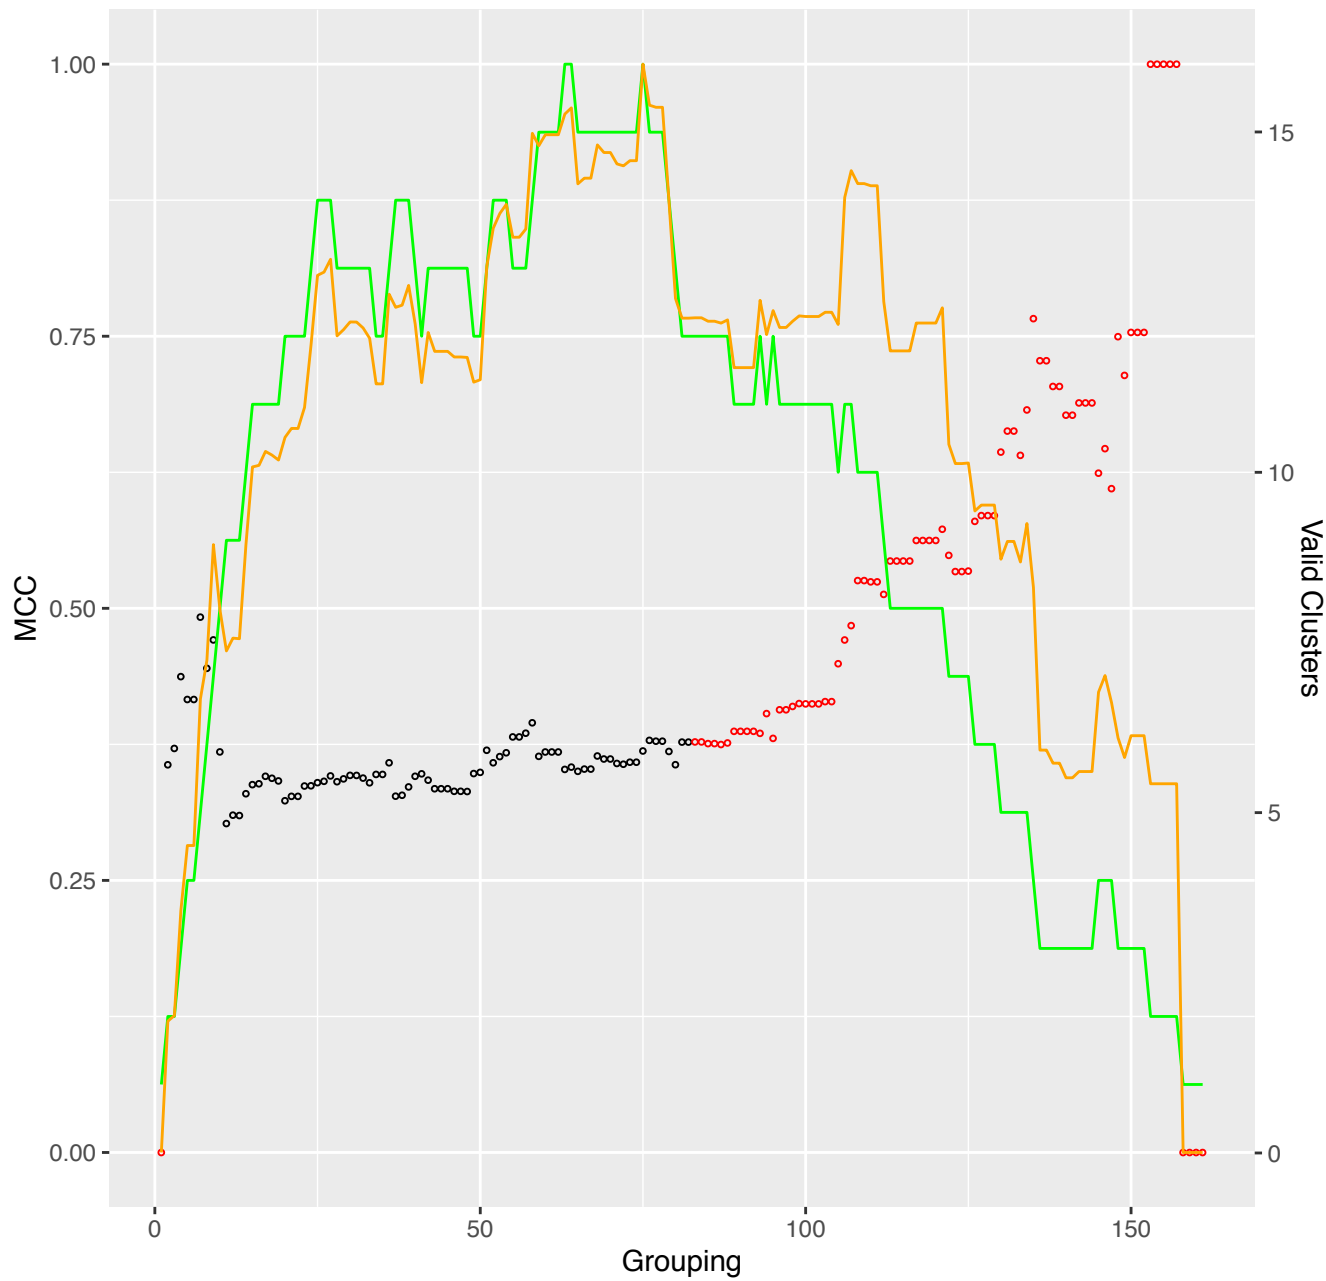

Concatenated tree (no EBNA-1) : grouping per country

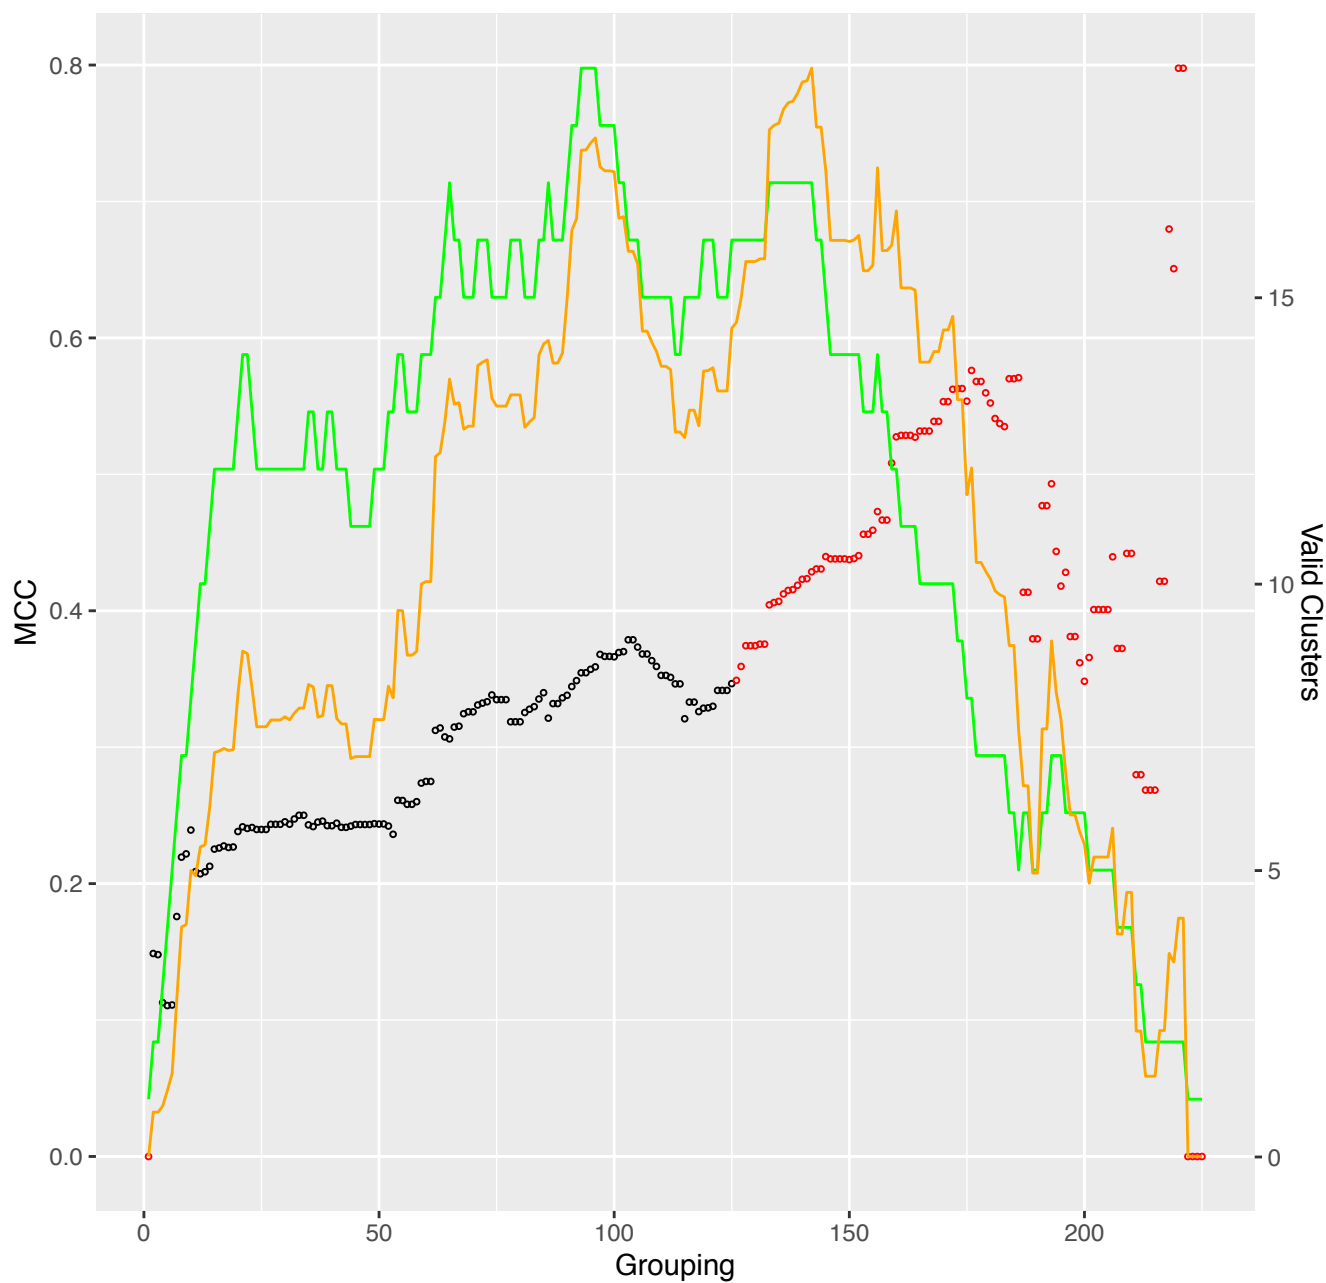

Concatenated tree (no EBNA-1) : grouping per continent

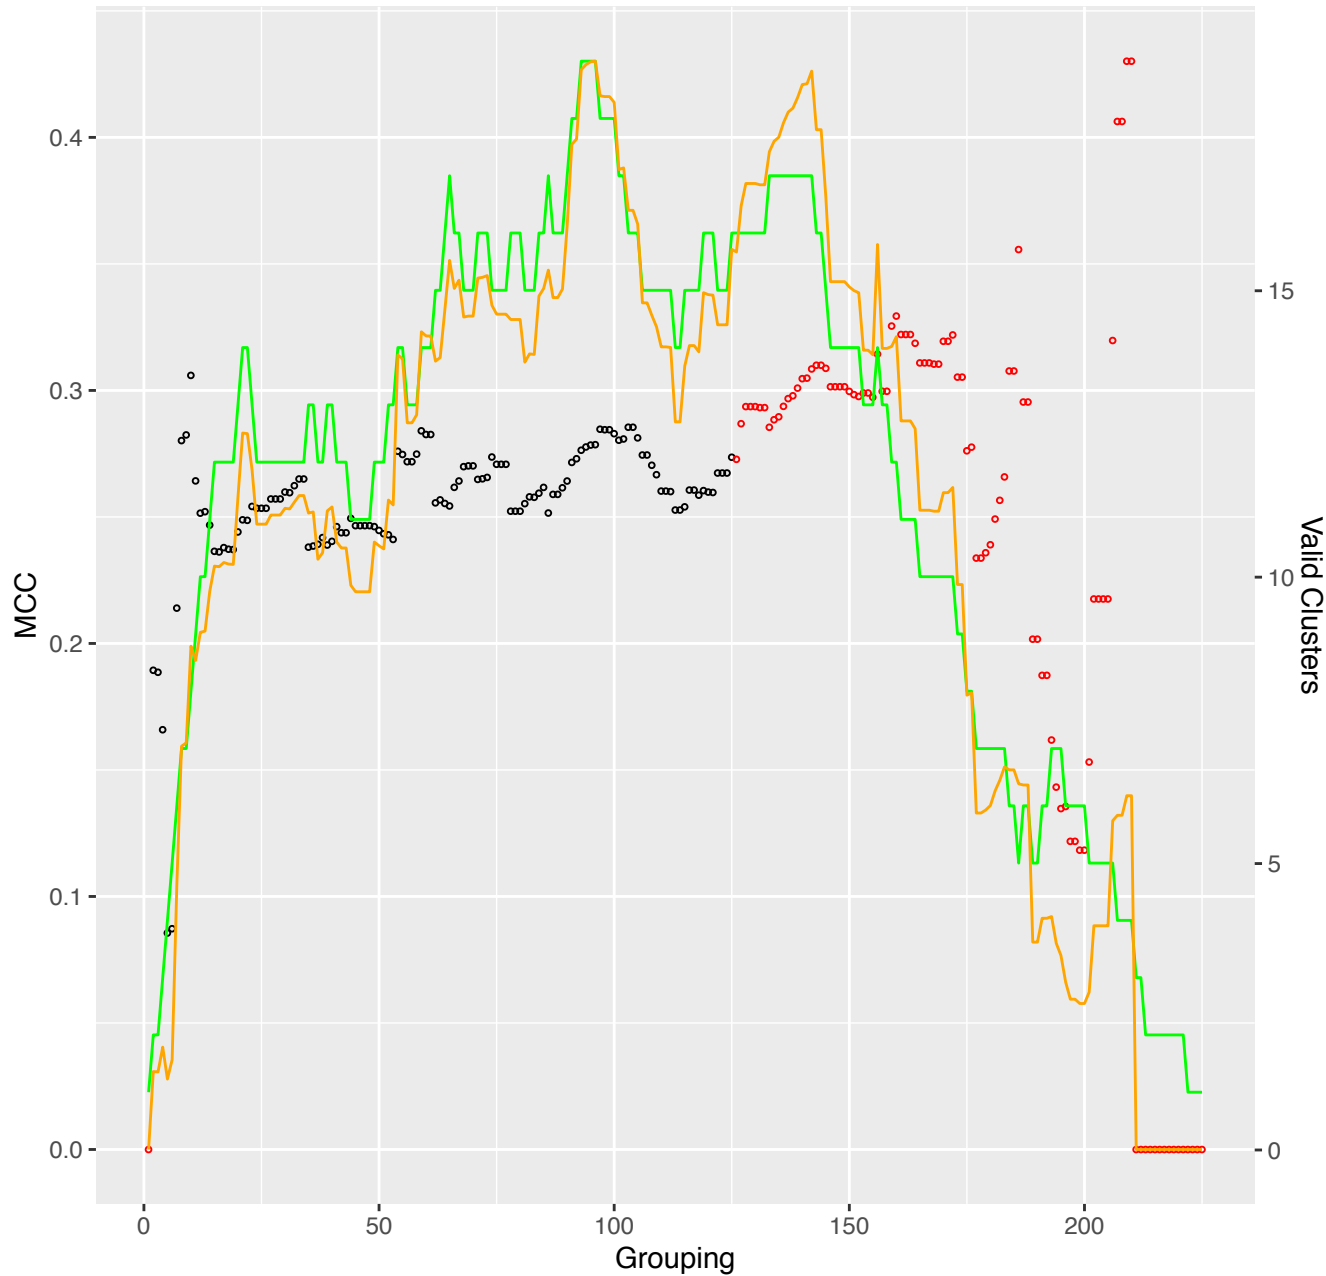

Supertree (conatenated tree isolates; no EBNA-1) : grouping per country

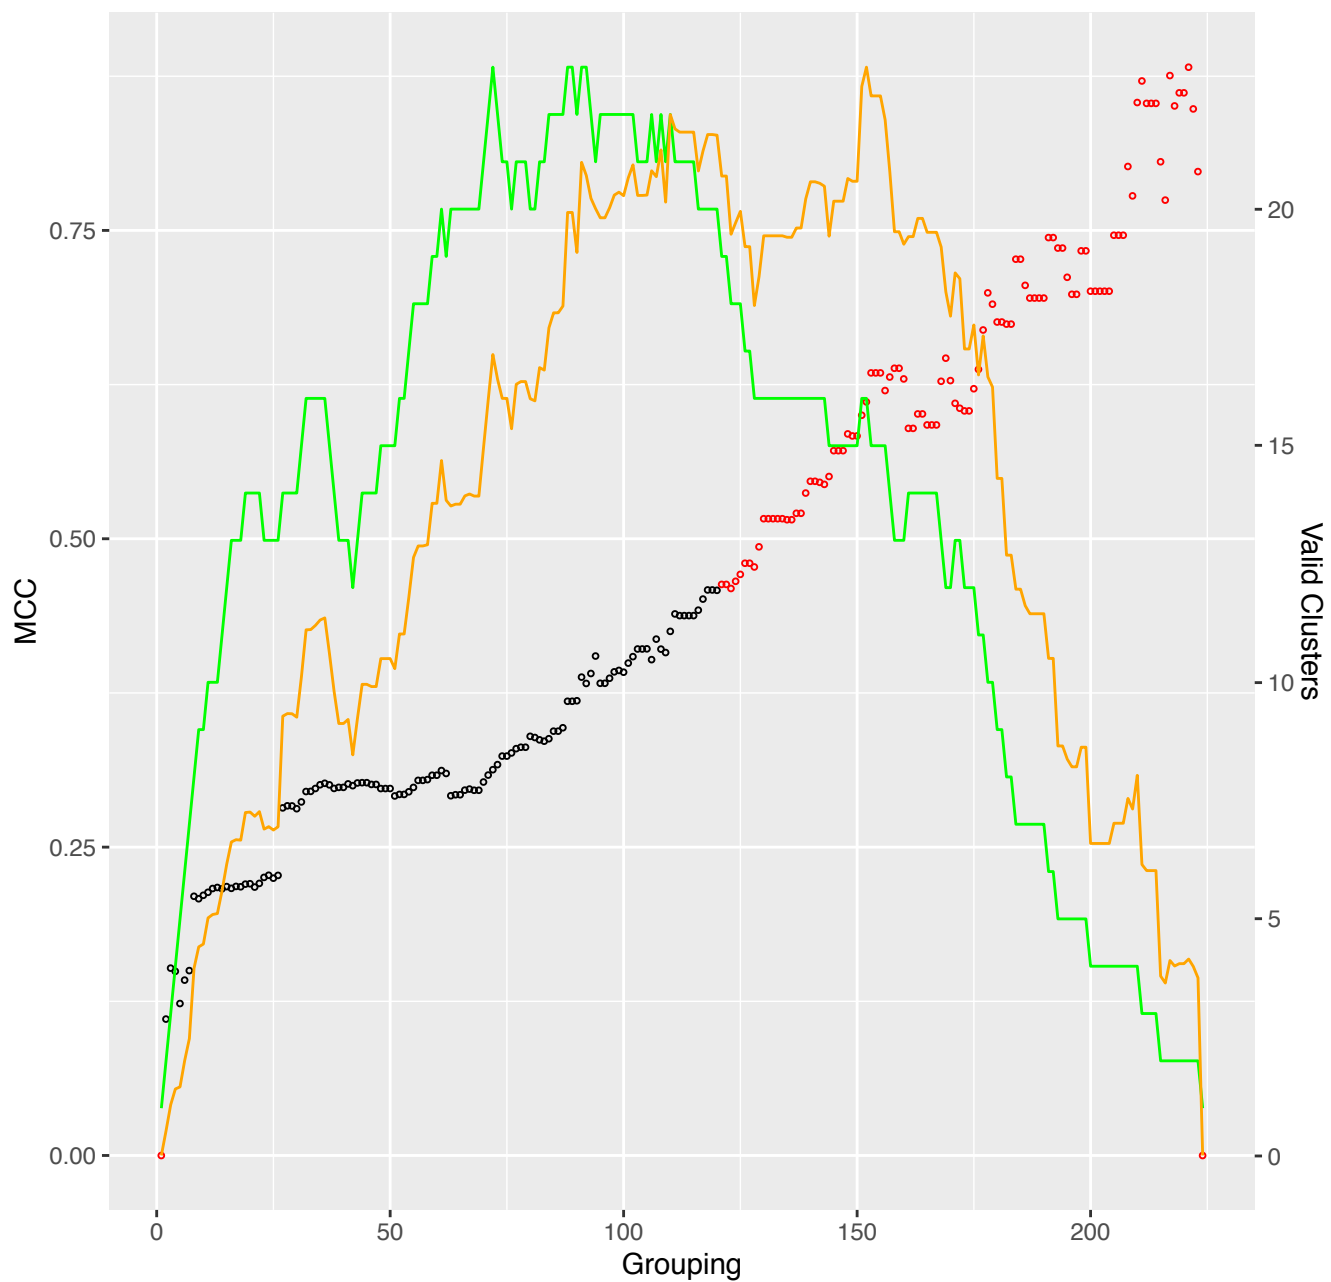

Supertree (conatenated tree isolates; no EBNA-1) : grouping per continent

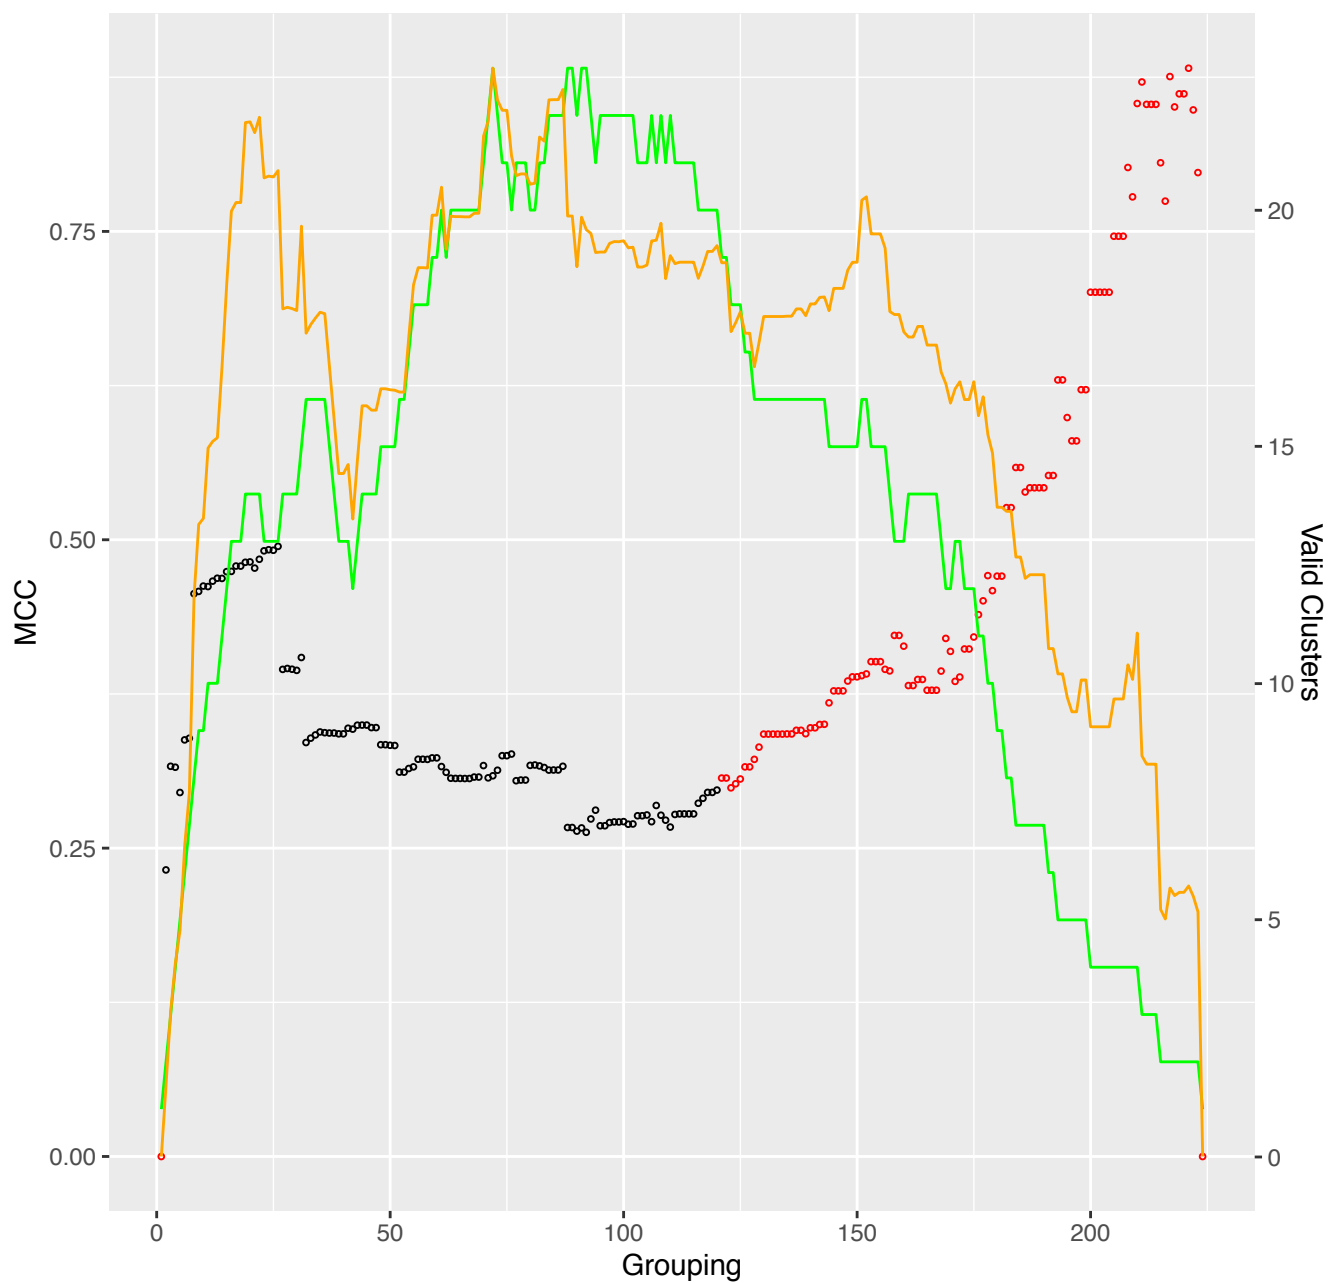

Concatenated tree (with Ns) : grouping per country

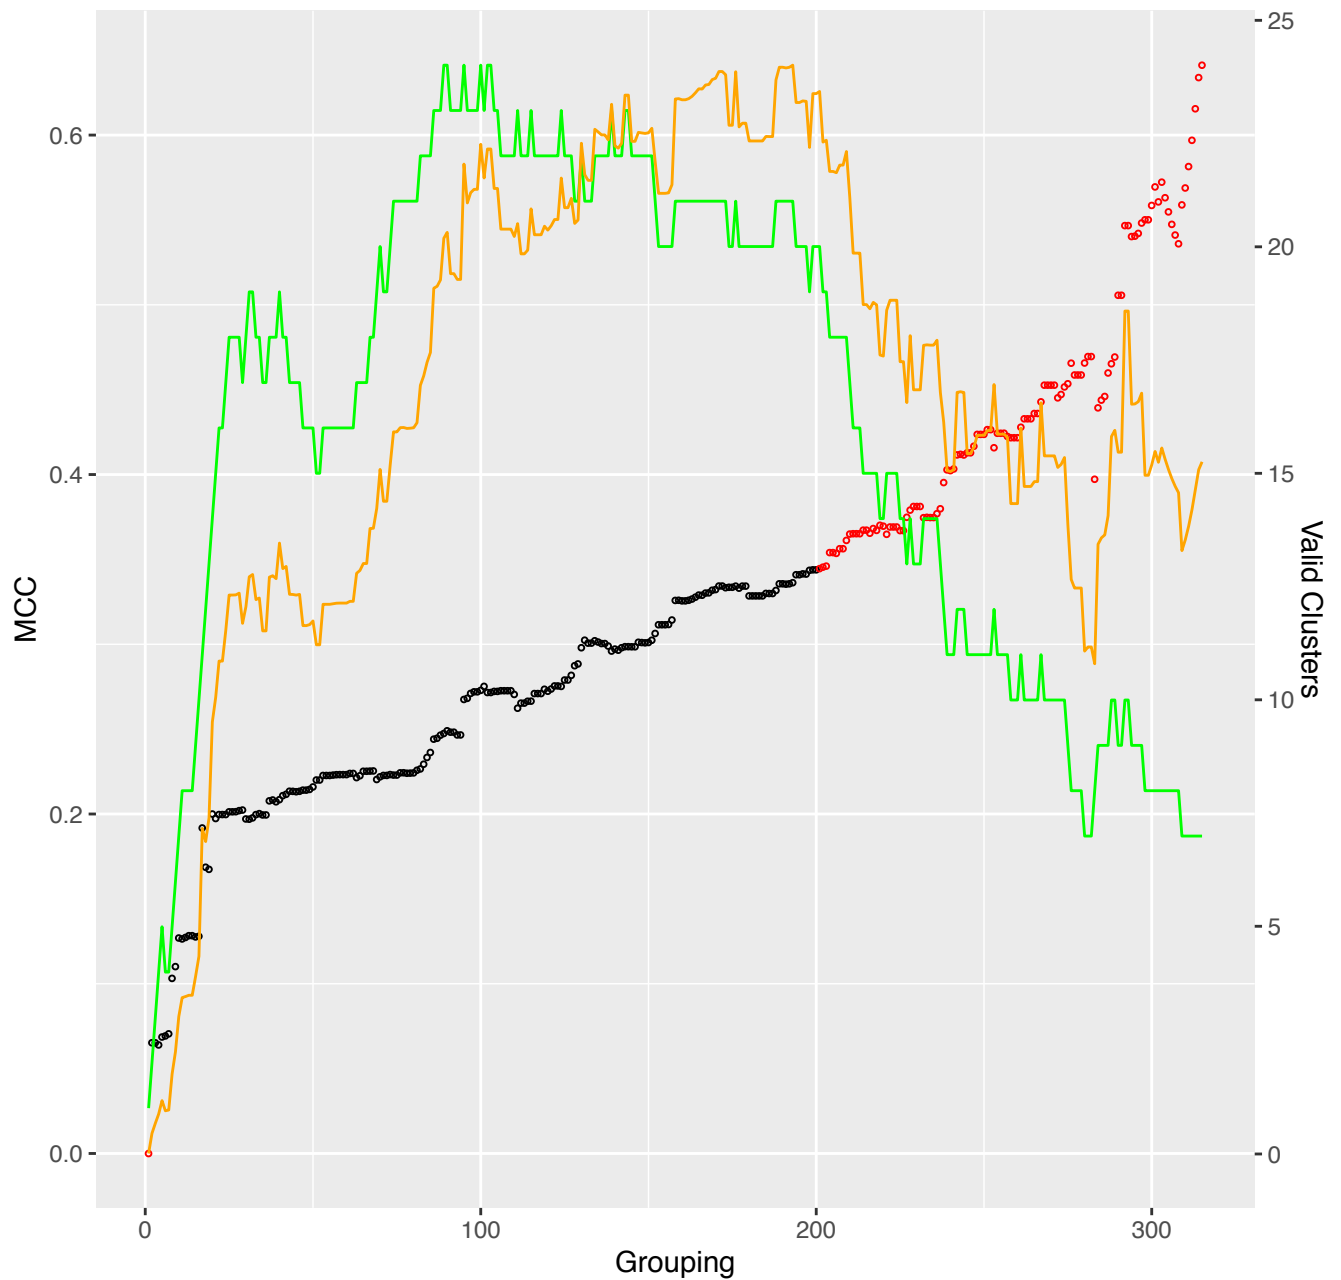



Concatenated tree (with Ns) : grouping per continent

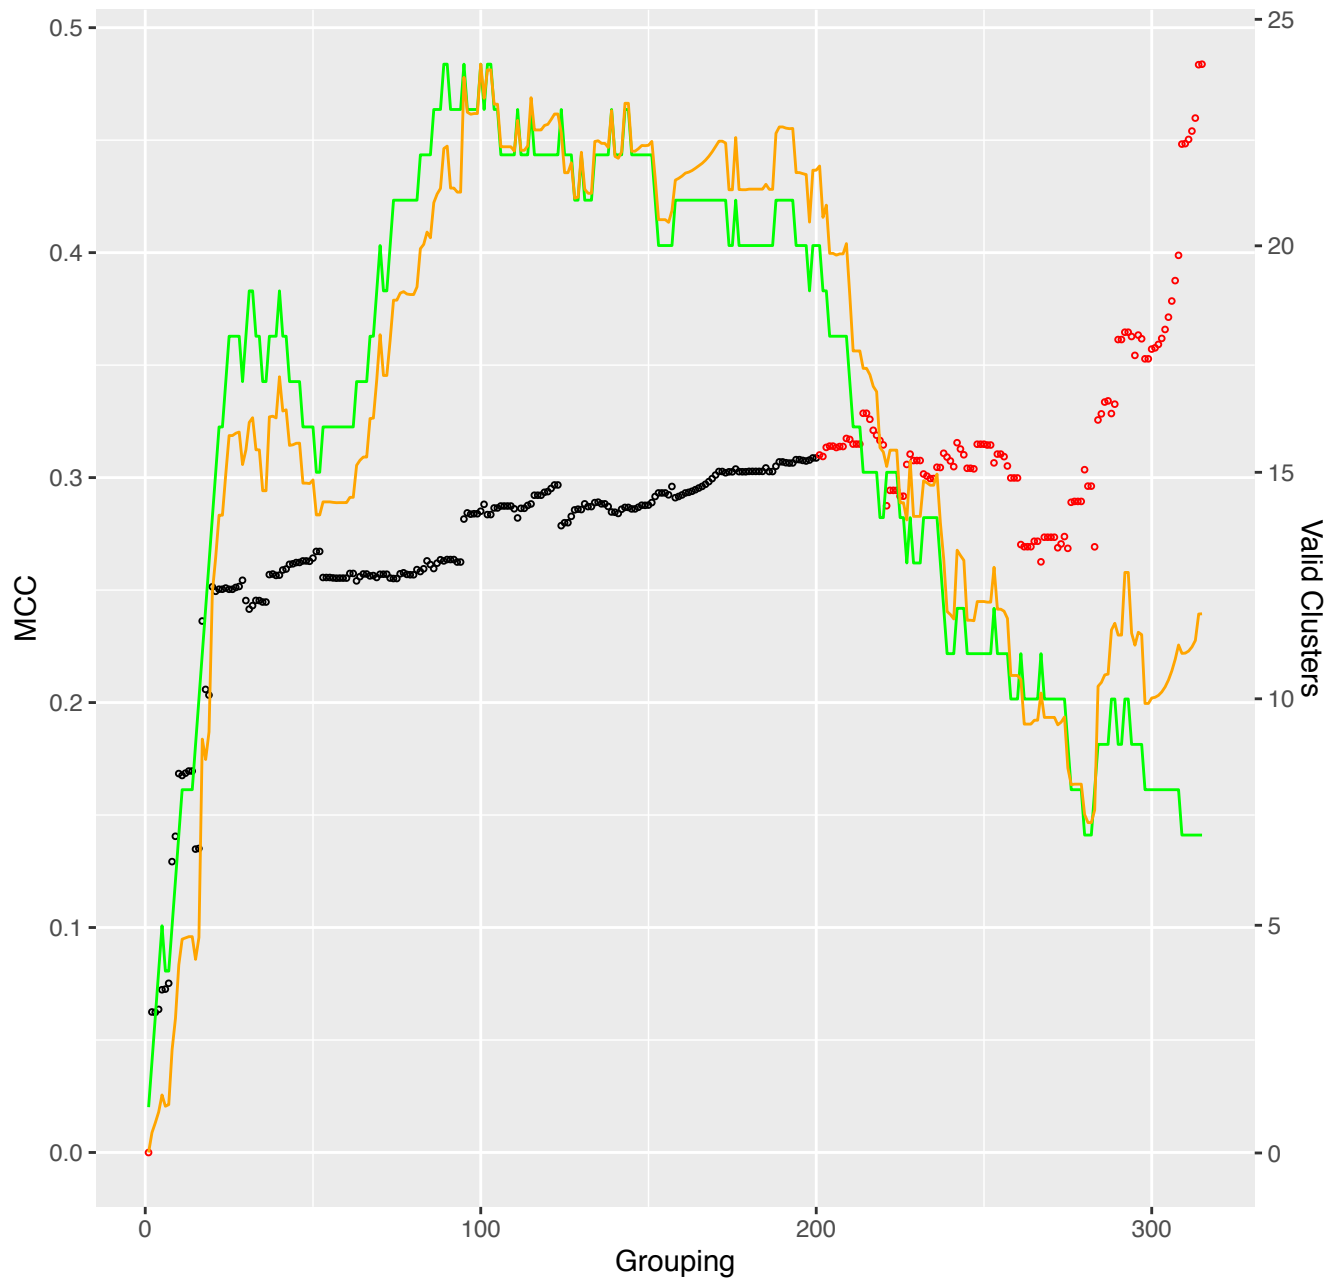

Concatenated tree (with Ns; no EBNA-1) : grouping per country

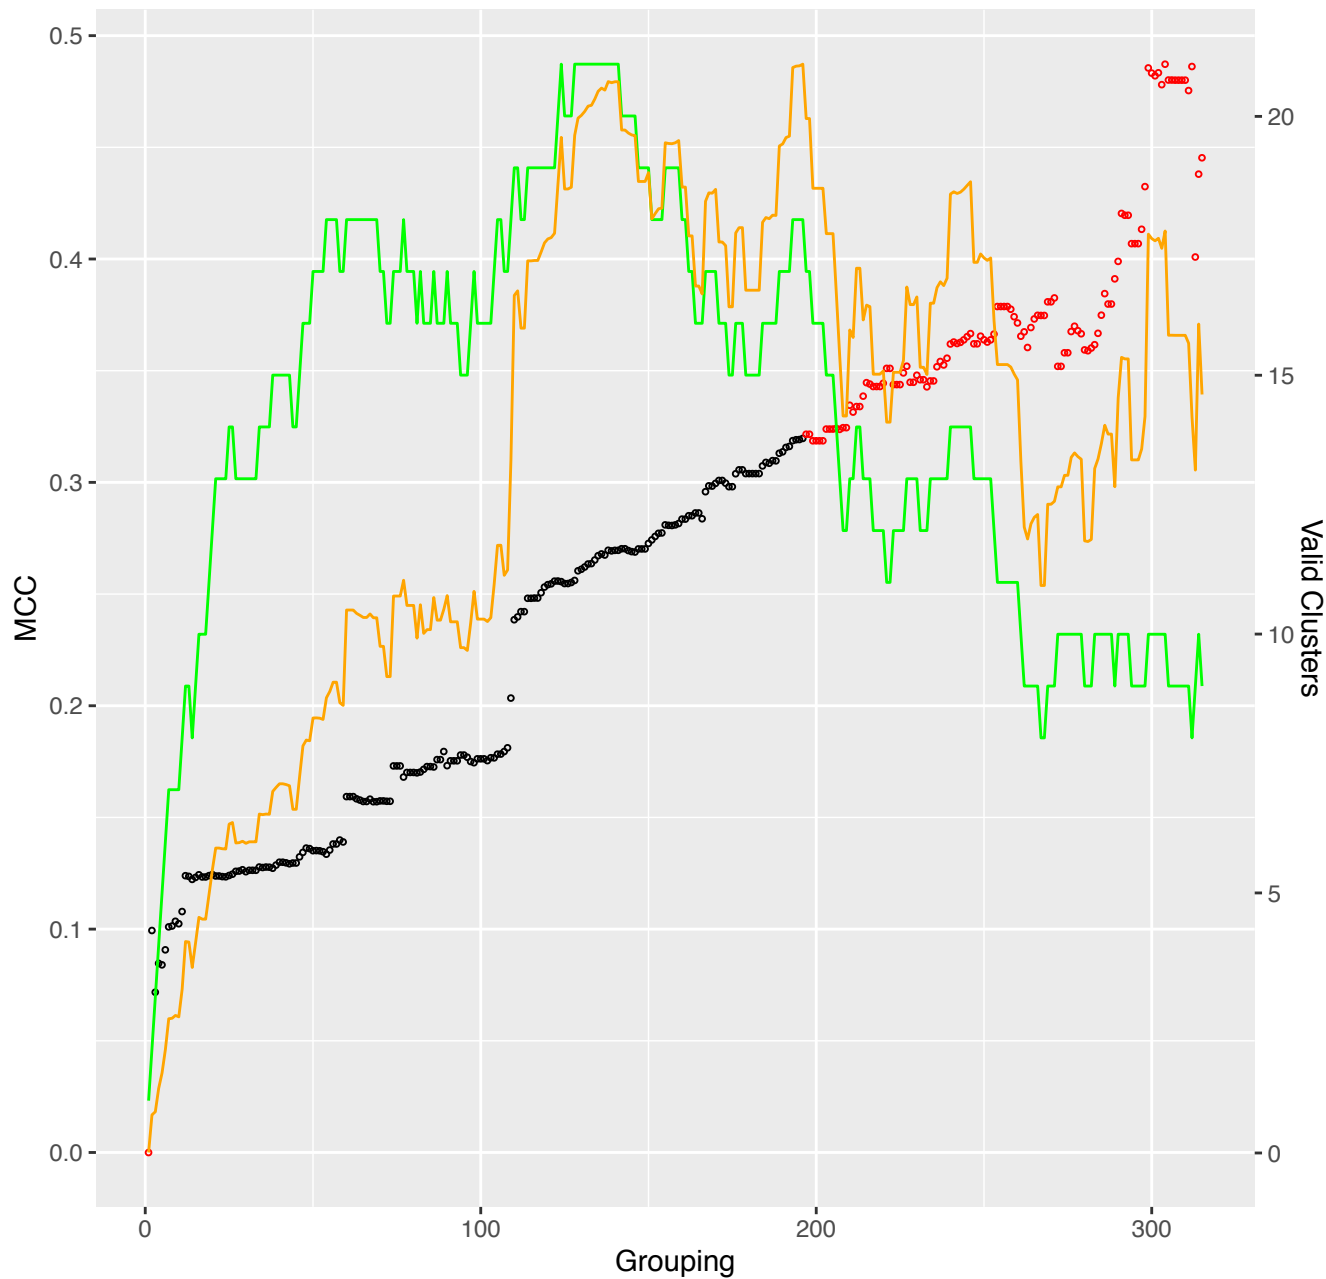

Concatenated tree (with Ns; no EBNA-1) : grouping per continent

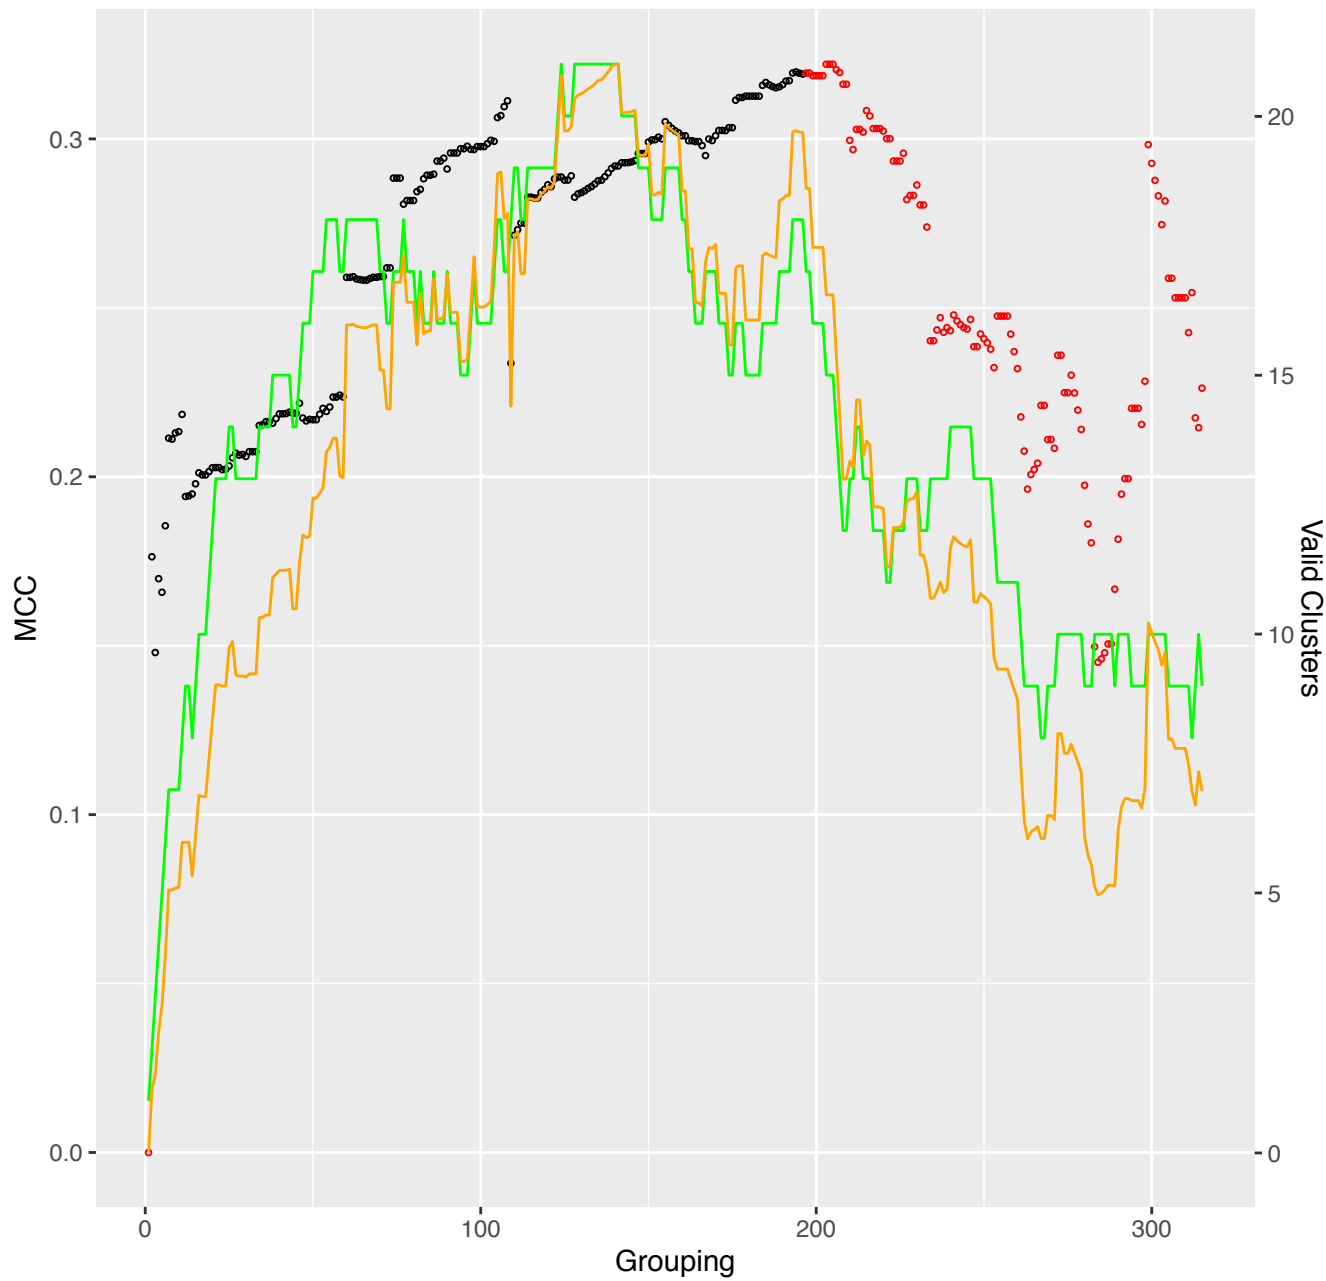

Supplement: s1 [file s1]
