# Supplementary material for: Expanding the Geographic Characterisation of Epstein–Barr Virus Variation through Gene-Based Approaches
Source: MDPI journal article supplement (doi:10.3390/microorganisms8111686), 2020-10-29

### **Supplementary Figure 7**

**Cluster/population associations:** Heatmaps representing the odds ratios of clusters/population associations for each gene, and for both country and continent are shown. The cells are coloured based on the logarithmic value of the correspondent odds ratios, and the absolute values are reported. Significant cluster/population associations are marked by blue borders. Clusters with less than 3 isolates were excluded from the analysis.

The heatmaps were generated for both max CGS and max MCC cuts.

### BDLF4 : grouping per country – max CGS

| Pop |   | Cluster |           |           |           |           |           |           |           |           |           |           |           |           |           |           |
|-----|---|---------|-----------|-----------|-----------|-----------|-----------|-----------|-----------|-----------|-----------|-----------|-----------|-----------|-----------|-----------|
|     |   | Clust.1 | Clust.118 | Clust.120 | Clust.123 | Clust.124 | Clust.125 | Clust.126 | Clust.127 | Clust.128 | Clust.129 | Clust.130 | Clust.131 | Clust.133 | Clust.157 | Clust.158 |
| WG  | - | 2.74    | 2.74      | 2.19      | 5.88      | 5.88      | 24.44     | 5.88      | 2.74      | 2.74      | 24.44     | 0.09      | 3.9       | 0.52      | 1.35      | 2.36      |
| USA | - | 3.49    | 7.61      | 2.78      | 3.49      | 3.49      | 3.49      | 7.61      | 7.61      | 3.49      | 3.49      | 2.18      | 2.78      | 1.79      | 1.72      | 0.24      |
| UK  | - | 1.58    | 13.52     | 1.26      | 1.58      | 1.58      | 1.58      | 1.58      | 1.58      | 1.58      | 1.58      | 3.56      | 2.19      | 0.3       | 1.09      | 1.16      |
| UG  | - | 12.57   | 12.57     | 10.03     | 12.57     | 12.57     | 12.57     | 12.57     | 12.57     | 12.57     | 12.57     | 1.34      | 10.03     | 9.91      | 6.21      | 1.14      |
| TW  | - | 14.71   | 14.71     | 11.73     | 14.71     | 14.71     | 14.71     | 14.71     | 14.71     | 14.71     | 14.71     | 0.43      | 11.73     | 2.81      | 7.27      | 0.92      |
| TU  | - | 4.47    | 4.47      | 3.57      | 4.47      | 4.47      | 4.47      | 4.47      | 42.62     | 42.62     | 4.47      | 0.15      | 3.57      | 0.85      | 2.21      | 0.7       |
| SK  | - | 44.62   | 44.62     | 35.6      | 44.62     | 44.62     | 44.62     | 44.62     | 44.62     | 44.62     | 44.62     | 1.32      | 35.6      | 8.53      | 22.06     | 2.78      |
| SA  | - | 17.7    | 17.7      | 14.12     | 17.7      | 17.7      | 17.7      | 59        | 17.7      | 17.7      | 17.7      | 0.52      | 14.12     | 6.26      | 8.75      | 1.91      |
| PO  | - | 7.91    | 7.91      | 12.85     | 7.91      | 19.33     | 7.91      | 7.91      | 7.91      | 19.33     | 19.33     | 0.23      | 6.31      | 1.51      | 3.91      | 2.51      |
| PN  | - | 7.23    | 7.23      | 5.77      | 7.23      | 7.23      | 7.23      | 7.23      | 7.23      | 7.23      | 7.23      | 0.21      | 5.77      | 1.38      | 3.57      | 0.45      |
| NG  | - | 29.67   | 29.67     | 23.67     | 29.67     | 29.67     | 29.67     | 29.67     | 29.67     | 29.67     | 29.67     | 0.88      | 23.67     | 5.67      | 14.67     | 17.38     |
| NAF | - | 10.97   | 10.97     | 8.75      | 10.97     | 10.97     | 10.97     | 10.97     | 10.97     | 10.97     | 10.97     | 3.67      | 8.75      | 2.09      | 5.42      | 2.32      |
| KE  | - | 2.96    | 2.96      | 13.24     | 2.96      | 2.96      | 2.96      | 2.96      | 2.96      | 2.96      | 2.96      | 0.93      | 13.24     | 3.69      | 1.46      | 3.2       |
| JP  | - | 7.91    | 7.91      | 6.31      | 7.91      | 7.91      | 7.91      | 7.91      | 7.91      | 7.91      | 7.91      | 0.23      | 6.31      | 1.51      | 3.91      | 0.49      |
| IT  | - | 2.96    | 2.96      | 2.36      | 2.96      | 6.37      | 6.37      | 2.96      | 2.96      | 2.96      | 2.96      | 6.33      | 2.36      | 0.56      | 1.46      | 0.98      |
| IN  | - | 2.96    | 2.96      | 2.36      | 2.96      | 2.96      | 2.96      | 2.96      | 2.96      | 2.96      | 2.96      | 0.09      | 2.36      | 0.56      | 37.61     | 0.2       |
| HK  | - | 7.23    | 7.23      | 5.77      | 7.23      | 7.23      | 7.23      | 7.23      | 7.23      | 7.23      | 7.23      | 0.21      | 5.77      | 1.38      | 3.57      | 0.45      |
| GH  | - | 12.57   | 12.57     | 10.03     | 176.5     | 12.57     | 12.57     | 12.57     | 12.57     | 12.57     | 12.57     | 5.53      | 10.03     | 2.4       | 6.21      | 0.78      |
| GE  | - | 44.62   | 44.62     | 35.6      | 44.62     | 44.62     | 44.62     | 44.62     | 44.62     | 44.62     | 44.62     | 5.37      | 35.6      | 8.53      | 22.06     | 2.78      |
| FR  | - | 44.62   | 44.62     | 35.6      | 44.62     | 44.62     | 44.62     | 44.62     | 44.62     | 44.62     | 44.62     | 5.37      | 35.6      | 8.53      | 22.06     | 2.78      |
| CO  | - | 8.72    | 8.72      | 6.96      | 8.72      | 8.72      | 8.72      | 8.72      | 8.72      | 8.72      | 8.72      | 1.35      | 6.96      | 30.09     | 4.31      | 0.54      |
| CH  | - | 3.34    | 3.34      | 2.66      | 3.34      | 3.34      | 3.34      | 3.34      | 3.34      | 3.34      | 3.34      | 0.1       | 2.66      | 0.64      | 2.39      | 0.23      |
| BR  | - | 12.57   | 12.57     | 23.4      | 12.57     | 12.57     | 12.57     | 12.57     | 12.57     | 12.57     | 12.57     | 2.73      | 10.03     | 2.4       | 6.21      | 0.78      |
| BO  | - | 155.56  | 7.23      | 5.77      | 7.23      | 7.23      | 7.23      | 7.23      | 7.23      | 7.23      | 7.23      | 0.59      | 5.77      | 1.84      | 3.57      | 0.45      |
| AU  | - | 4.02    | 4.02      | 3.21      | 4.02      | 4.02      | 4.02      | 4.02      | 4.02      | 4.02      | 4.02      | 4.43      | 3.21      | 0.94      | 1.99      | 2.61      |
| AR  | - | 8.72    | 8.72      | 6.96      | 8.72      | 8.72      | 8.72      | 8.72      | 8.72      | 8.72      | 8.72      | 0.76      | 6.96      | 10.47     | 4.31      | 1.64      |
| AF  | - | 10.97   | 10.97     | 8.75      | 10.97     | 10.97     | 10.97     | 10.97     | 10.97     | 10.97     | 10.97     | 1.07      | 8.75      | 2.09      | 5.42      | 4.44      |

## BDLF4 : grouping per country – Max MCC

| Pop   | Cluster |          |          |          |          |          |          |          |          |          |
|-------|---------|----------|----------|----------|----------|----------|----------|----------|----------|----------|
|       | Clust.1 | Clust.47 | Clust.53 | Clust.57 | Clust.58 | Clust.59 | Clust.64 | Clust.65 | Clust.69 | Clust.70 |
| WG -  | 0.28    | 0.34     | 2.74     | 2.74     | 1.03     | 0.35     | 1.82     | 2.74     | 1.35     | 2.36     |
| USA - | 0.36    | 0.5      | 32       | 7.61     | 2.32     | 1.14     | 2.31     | 32       | 1.72     | 0.24     |
| UK -  | 0.38    | 0.22     | 1.58     | 13.52    | 2.23     | 0.2      | 1.05     | 1.58     | 1.09     | 1.16     |
| UG -  | 1.31    | 1.55     | 12.57    | 12.57    | 0.84     | 6.31     | 8.33     | 12.57    | 6.21     | 1.14     |
| TW -  | 6.73    | 18.98    | 14.71    | 14.71    | 0.27     | 1.89     | 9.75     | 14.71    | 7.27     | 0.92     |
| TU -  | 0.46    | 0.55     | 10       | 4.47     | 0.84     | 0.57     | 2.96     | 4.47     | 2.21     | 0.7      |
| SK -  | 19.24   | 5.52     | 44.62    | 44.62    | 0.84     | 5.72     | 29.58    | 44.62    | 22.06    | 2.78     |
| SA -  | 1.85    | 2.19     | 17.7     | 17.7     | 1.7      | 4.06     | 11.73    | 17.7     | 8.75     | 1.91     |
| PO -  | 0.82    | 0.98     | 7.91     | 7.91     | 1.13     | 1.01     | 5.24     | 7.91     | 3.91     | 2.51     |
| PN -  | 0.96    | 0.89     | 7.23     | 7.23     | 0.13     | 0.93     | 4.79     | 7.23     | 3.57     | 0.45     |
| NG -  | 3.1     | 3.67     | 29.67    | 29.67    | 0.56     | 3.8      | 19.67    | 29.67    | 14.67    | 17.38    |
| NAF - | 1.14    | 1.35     | 10.97    | 10.97    | 2.29     | 1.41     | 14.54    | 10.97    | 5.42     | 2.32     |
| KE -  | 0.31    | 0.36     | 2.96     | 2.96     | 1.17     | 2.24     | 1.96     | 2.96     | 1.46     | 3.2      |
| JP -  | 7.11    | 13.58    | 7.91     | 7.91     | 0.15     | 1.01     | 5.24     | 7.91     | 3.91     | 0.49     |
| IT -  | 0.31    | 0.36     | 2.96     | 2.96     | 5.49     | 0.38     | 1.96     | 6.37     | 1.46     | 0.98     |
| IN -  | 20.66   | 1.48     | 2.96     | 2.96     | 0.05     | 0.38     | 1.96     | 2.96     | 37.61    | 0.2      |
| HK -  | 2.2     | 0.89     | 7.23     | 7.23     | 0.13     | 11.81    | 65.06    | 7.23     | 3.57     | 0.45     |
| GH -  | 1.31    | 1.55     | 12.57    | 12.57    | 12.32    | 1.61     | 8.33     | 12.57    | 6.21     | 0.78     |
| GE -  | 4.66    | 5.52     | 44.62    | 44.62    | 3.39     | 5.72     | 29.58    | 44.62    | 22.06    | 2.78     |
| FR -  | 4.66    | 5.52     | 44.62    | 44.62    | 3.39     | 5.72     | 29.58    | 44.62    | 22.06    | 2.78     |
| CO -  | 0.91    | 1.08     | 8.72     | 8.72     | 0.84     | 17.83    | 5.78     | 8.72     | 4.31     | 0.54     |
| CH -  | 1.41    | 49.69    | 3.34     | 3.34     | 0.06     | 1.08     | 2.21     | 3.34     | 2.39     | 0.23     |
| BR -  | 1.95    | 1.55     | 12.57    | 12.57    | 3.45     | 1.61     | 17.5     | 12.57    | 6.21     | 0.78     |
| BO -  | 3.85    | 0.89     | 7.23     | 7.23     | 0.37     | 4.86     | 4.79     | 7.23     | 3.57     | 0.45     |
| AU -  | 0.42    | 0.5      | 4.02     | 4.02     | 3.36     | 0.61     | 2.67     | 4.02     | 1.99     | 2.61     |
| AR -  | 0.91    | 1.08     | 8.72     | 8.72     | 0.47     | 6.52     | 5.78     | 8.72     | 4.31     | 1.64     |
| AF -  | 1.14    | 1.35     | 10.97    | 10.97    | 1.27     | 1.41     | 7.27     | 10.97    | 5.42     | 4.44     |

# BDLF4 : grouping per continent – max CGS

Pop

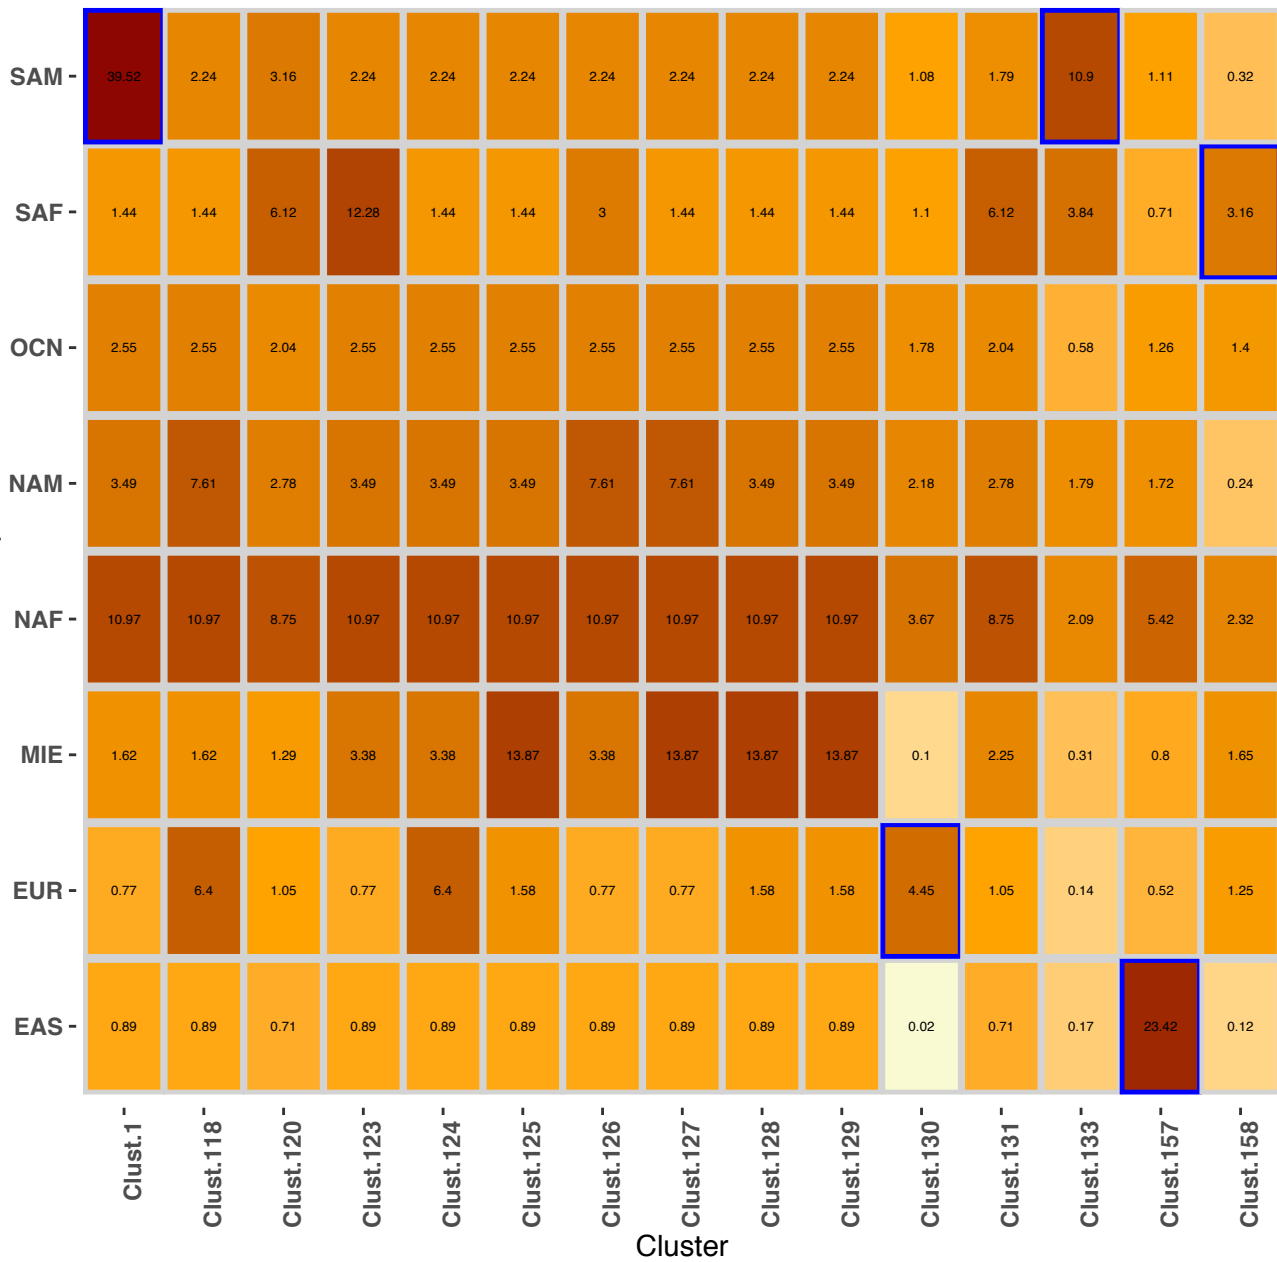

BDLF4 : grouping per continent – Max MCC

Pop

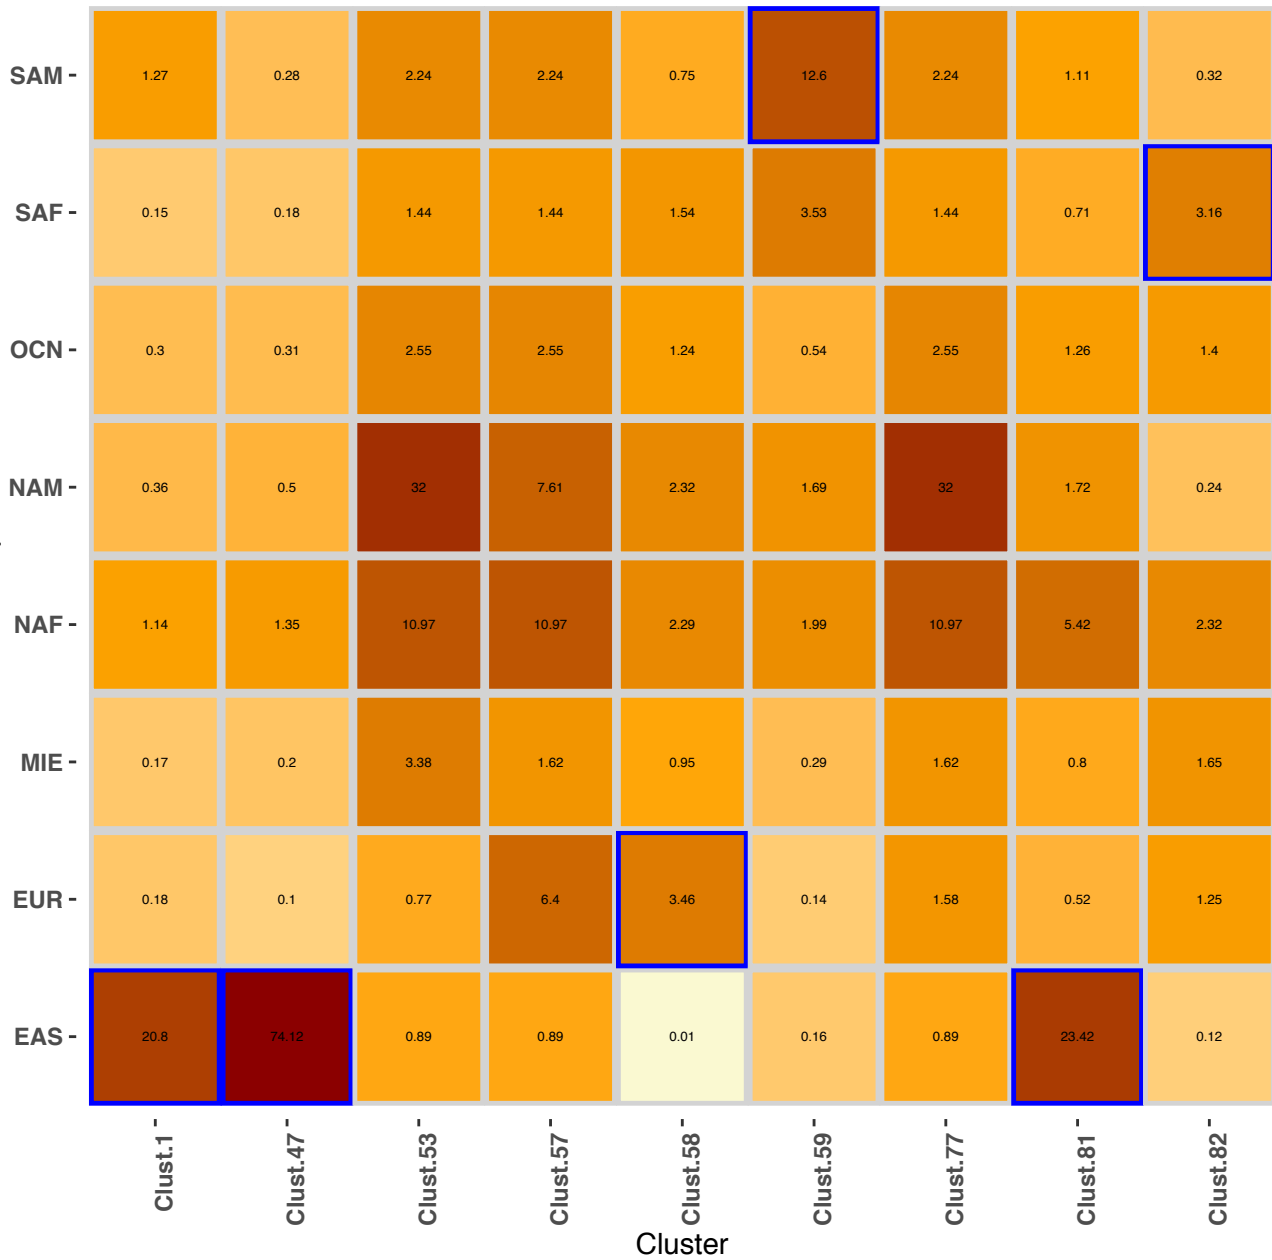

# BGLF4 : grouping per country – max CGS

Pop

| WG -  | 0.18      | 2.75       | 0.71       | 1.56       | 38.19      | 5.89       | 1.04       | 2.75       | 26.4        | 2.26        | 1.08        | 1.2         | 12.22       | 2.19        | 2.19        |
|-------|-----------|------------|------------|------------|------------|------------|------------|------------|-------------|-------------|-------------|-------------|-------------|-------------|-------------|
| USA - | 0.27      | 3.66       | 0.94       | 2.07       | 2.92       | 3.66       | 5.79       | 3.66       | 2.07        | 0.64        | 1.44        | 5.55        | 2.92        | 2.92        | 5.33        |
| UK -  | 0.53      | 1.66       | 0.43       | 0.94       | 1.33       | 1.66       | 0.5        | 1.66       | 0.94        | 0.98        | 2           | 0.73        | 1.33        | 1.33        | 2.31        |
| UG -  | 0.82      | 12.61      | 3.26       | 7.14       | 10.06      | 12.61      | 3.78       | 35.3       | 7.14        | 1.31        | 4.96        | 5.52        | 10.06       | 10.06       | 10.06       |
| TW -  | 9.4       | 14.75      | 3.81       | 8.36       | 11.77      | 14.75      | 4.42       | 14.75      | 8.36        | 1.64        | 5.8         | 6.46        | 11.77       | 11.77       | 11.77       |
| TU -  | 0.29      | 4.49       | 1.16       | 2.54       | 3.58       | 42.75      | 1.78       | 4.49       | 10.59       | 0.81        | 1.76        | 7.02        | 6.67        | 3.58        | 6.67        |
| SK -  | 11.92     | 44.75      | 11.57      | 25.36      | 35.7       | 44.75      | 13.42      | 44.75      | 25.36       | 3.19        | 17.6        | 19.61       | 35.7        | 35.7        | 35.7        |
| SA -  | 1.15      | 17.75      | 4.59       | 10.06      | 14.16      | 17.75      | 5.32       | 17.75      | 10.06       | 1.27        | 6.98        | 16.67       | 14.16       | 14.16       | 14.16       |
| PO -  | 0.51      | 7.93       | 2.05       | 4.49       | 6.33       | 7.93       | 8.53       | 7.93       | 4.49        | 1.66        | 4.76        | 5.46        | 6.33        | 6.33        | 6.33        |
| PN -  | 0.47      | 7.25       | 1.87       | 409.5      | 5.78       | 7.25       | 2.17       | 7.25       | 4.11        | 0.52        | 2.85        | 3.18        | 5.78        | 130.88      | 5.78        |
| NG -  | 1.94      | 29.75      | 7.69       | 16.86      | 23.73      | 29.75      | 8.92       | 29.75      | 16.86       | 20.04       | 11.7        | 13.04       | 23.73       | 23.73       | 23.73       |
| NAF - | 0.71      | 11         | 2.84       | 6.23       | 19.5       | 11         | 3.3        | 11         | 6.23        | 2.68        | 4.33        | 4.82        | 8.78        | 8.78        | 8.78        |
| KE -  | 0.19      | 2.96       | 0.76       | 1.68       | 2.36       | 2.96       | 0.89       | 6.38       | 1.68        | 3.09        | 1.16        | 1.3         | 2.36        | 2.36        | 2.36        |
| JP -  | 18.55     | 7.25       | 1.87       | 4.11       | 5.78       | 7.25       | 2.17       | 7.25       | 4.11        | 0.52        | 2.85        | 3.18        | 5.78        | 5.78        | 5.78        |
| IT -  | 0.19      | 2.96       | 0.76       | 1.68       | 2.36       | 2.96       | 7.09       | 2.96       | 1.68        | 0.5         | 31.52       | 1.8         | 2.36        | 2.36        | 2.36        |
| IN -  | 1.04      | 53.6       | 358.93     | 1.68       | 2.36       | 2.96       | 0.89       | 2.96       | 1.68        | 0.23        | 1.16        | 1.8         | 2.36        | 4.24        | 2.36        |
| HK -  | 88.57     | 7.25       | 1.87       | 4.11       | 5.78       | 7.25       | 2.17       | 7.25       | 4.11        | 0.52        | 2.85        | 3.18        | 5.78        | 5.78        | 5.78        |
| GH -  | 0.82      | 12.61      | 3.26       | 7.14       | 10.06      | 12.61      | 3.78       | 12.61      | 7.14        | 0.9         | 4.96        | 5.52        | 10.06       | 10.06       | 10.06       |
| GE -  | 2.92      | 44.75      | 11.57      | 25.36      | 35.7       | 44.75      | 13.42      | 44.75      | 25.36       | 3.19        | 17.6        | 19.61       | 35.7        | 35.7        | 35.7        |
| FR -  | 2.92      | 44.75      | 11.57      | 25.36      | 35.7       | 44.75      | 13.42      | 44.75      | 25.36       | 3.19        | 17.6        | 19.61       | 35.7        | 35.7        | 35.7        |
| CO -  | 0.43      | 6.67       | 1.72       | 3.78       | 5.32       | 6.67       | 2          | 15.77      | 3.78        | 0.47        | 2.62        | 2.92        | 5.32        | 5.32        | 5.32        |
| CH -  | 35.01     | 3.35       | 0.86       | 1.9        | 2.67       | 3.35       | 1          | 3.35       | 1.9         | 0.58        | 1.32        | 1.47        | 2.67        | 2.67        | 4.84        |
| BR -  | 1.19      | 12.61      | 3.26       | 7.14       | 10.06      | 12.61      | 3.78       | 12.61      | 7.14        | 0.9         | 4.96        | 5.52        | 10.06       | 10.06       | 10.06       |
| BO -  | 0.47      | 7.25       | 1.87       | 4.11       | 5.78       | 7.25       | 2.17       | 7.25       | 4.11        | 0.52        | 2.85        | 3.18        | 5.78        | 5.78        | 5.78        |
| AU -  | 0.26      | 4.04       | 1.04       | 2.29       | 3.22       | 4.04       | 1.58       | 4.04       | 2.29        | 2.31        | 1.59        | 1.77        | 3.22        | 3.22        | 3.22        |
| AR -  | 0.57      | 8.75       | 2.26       | 4.96       | 6.98       | 8.75       | 2.62       | 8.75       | 4.96        | 1.9         | 3.44        | 3.83        | 14.54       | 6.98        | 6.98        |
| AF -  | 0.71      | 11         | 2.84       | 6.23       | 8.78       | 11         | 3.3        | 11         | 6.23        | 5.15        | 4.33        | 4.82        | 8.78        | 8.78        | 8.78        |
|       | Clust.6 - | Clust.49 - | Clust.50 - | Clust.51 - | Clust.52 - | Clust.53 - | Clust.73 - | Clust.77 - | Clust.141 - | Clust.142 - | Clust.145 - | Clust.181 - | Clust.184 - | Clust.185 - | Clust.186 - |

Cluster

### BGLF4 : grouping per country – Max MCC

| Pop   |  | Cluster |          |          |          |          |          |          |           |           |           |           |           |           |           |
|-------|--|---------|----------|----------|----------|----------|----------|----------|-----------|-----------|-----------|-----------|-----------|-----------|-----------|
|       |  | Clust.6 | Clust.49 | Clust.50 | Clust.51 | Clust.52 | Clust.69 | Clust.73 | Clust.137 | Clust.138 | Clust.141 | Clust.177 | Clust.180 | Clust.181 | Clust.182 |
| WG -  |  | 0.18    | 2.75     | 0.71     | 1.56     | 17.55    | 0.81     | 2.75     | 26.4      | 2.26      | 1.08      | 1.2       | 12.22     | 2.19      | 2.19      |
| USA - |  | 0.27    | 3.66     | 0.94     | 2.07     | 1.81     | 4.3      | 3.66     | 2.07      | 0.64      | 1.44      | 5.55      | 2.92      | 2.92      | 5.33      |
| UK -  |  | 0.53    | 1.66     | 0.43     | 0.94     | 0.82     | 0.4      | 1.66     | 0.94      | 0.98      | 2         | 0.73      | 1.33      | 1.33      | 2.31      |
| UG -  |  | 0.82    | 12.61    | 3.26     | 7.14     | 6.23     | 3.04     | 35.3     | 7.14      | 1.31      | 4.96      | 5.52      | 10.06     | 10.06     | 10.06     |
| TW -  |  | 9.4     | 14.75    | 3.81     | 8.36     | 7.29     | 3.56     | 14.75    | 8.36      | 1.64      | 5.8       | 6.46      | 11.77     | 11.77     | 11.77     |
| TU -  |  | 0.29    | 4.49     | 1.16     | 2.54     | 8.45     | 1.38     | 4.49     | 10.59     | 0.81      | 1.76      | 7.02      | 6.67      | 3.58      | 6.67      |
| SK -  |  | 11.92   | 44.75    | 11.57    | 25.36    | 22.12    | 10.81    | 44.75    | 25.36     | 3.19      | 17.6      | 19.61     | 35.7      | 35.7      | 35.7      |
| SA -  |  | 1.15    | 17.75    | 4.59     | 10.06    | 8.78     | 4.29     | 17.75    | 10.06     | 1.27      | 6.98      | 16.67     | 14.16     | 14.16     | 14.16     |
| PO -  |  | 0.51    | 7.93     | 2.05     | 4.49     | 3.92     | 6.5      | 7.93     | 4.49      | 1.66      | 4.76      | 5.46      | 6.33      | 6.33      | 6.33      |
| PN -  |  | 0.47    | 7.25     | 1.87     | 409.5    | 3.58     | 1.75     | 7.25     | 4.11      | 0.52      | 2.85      | 3.18      | 5.78      | 130.88    | 5.78      |
| NG -  |  | 1.94    | 29.75    | 7.69     | 16.86    | 14.71    | 7.19     | 29.75    | 16.86     | 20.04     | 11.7      | 13.04     | 23.73     | 23.73     | 23.73     |
| NAF - |  | 0.71    | 11       | 2.84     | 6.23     | 9.67     | 2.66     | 11       | 6.23      | 2.68      | 4.33      | 4.82      | 8.78      | 8.78      | 8.78      |
| KE -  |  | 0.19    | 2.96     | 0.76     | 1.68     | 1.46     | 0.71     | 6.38     | 1.68      | 3.09      | 1.16      | 1.3       | 2.36      | 2.36      | 2.36      |
| JP -  |  | 18.55   | 7.25     | 1.87     | 4.11     | 3.58     | 1.75     | 7.25     | 4.11      | 0.52      | 2.85      | 3.18      | 5.78      | 5.78      | 5.78      |
| IT -  |  | 0.19    | 2.96     | 0.76     | 1.68     | 1.46     | 5.11     | 2.96     | 1.68      | 0.5       | 31.52     | 1.8       | 2.36      | 2.36      | 2.36      |
| IN -  |  | 1.04    | 53.6     | 358.93   | 1.68     | 1.46     | 0.71     | 2.96     | 1.68      | 0.23      | 1.16      | 1.8       | 2.36      | 4.24      | 2.36      |
| HK -  |  | 88.57   | 7.25     | 1.87     | 4.11     | 3.58     | 1.75     | 7.25     | 4.11      | 0.52      | 2.85      | 3.18      | 5.78      | 5.78      | 5.78      |
| GH -  |  | 0.82    | 12.61    | 3.26     | 7.14     | 6.23     | 3.04     | 12.61    | 7.14      | 0.9       | 4.96      | 5.52      | 10.06     | 10.06     | 10.06     |
| GE -  |  | 2.92    | 44.75    | 11.57    | 25.36    | 22.12    | 10.81    | 44.75    | 25.36     | 3.19      | 17.6      | 19.61     | 35.7      | 35.7      | 35.7      |
| FR -  |  | 2.92    | 44.75    | 11.57    | 25.36    | 22.12    | 10.81    | 44.75    | 25.36     | 3.19      | 17.6      | 19.61     | 35.7      | 35.7      | 35.7      |
| CO -  |  | 0.43    | 6.67     | 1.72     | 3.78     | 3.3      | 1.61     | 15.77    | 3.78      | 0.47      | 2.62      | 2.92      | 5.32      | 5.32      | 5.32      |
| CH -  |  | 35.01   | 3.35     | 0.86     | 1.9      | 1.66     | 0.81     | 3.35     | 1.9       | 0.58      | 1.32      | 1.47      | 2.67      | 2.67      | 4.84      |
| BR -  |  | 1.19    | 12.61    | 3.26     | 7.14     | 6.23     | 3.04     | 12.61    | 7.14      | 0.9       | 4.96      | 5.52      | 10.06     | 10.06     | 10.06     |
| BO -  |  | 0.47    | 7.25     | 1.87     | 4.11     | 3.58     | 1.75     | 7.25     | 4.11      | 0.52      | 2.85      | 3.18      | 5.78      | 5.78      | 5.78      |
| AU -  |  | 0.26    | 4.04     | 1.04     | 2.29     | 1.99     | 7.5      | 4.04     | 2.29      | 2.31      | 1.59      | 1.77      | 3.22      | 3.22      | 3.22      |
| AR -  |  | 0.57    | 8.75     | 2.26     | 4.96     | 4.33     | 2.11     | 8.75     | 4.96      | 1.9       | 3.44      | 3.83      | 14.54     | 6.98      | 6.98      |
| AF -  |  | 0.71    | 11       | 2.84     | 6.23     | 5.44     | 2.66     | 11       | 6.23      | 5.15      | 4.33      | 4.82      | 8.78      | 8.78      | 8.78      |

# BGLF4 : grouping per continent – max CGS

Pop

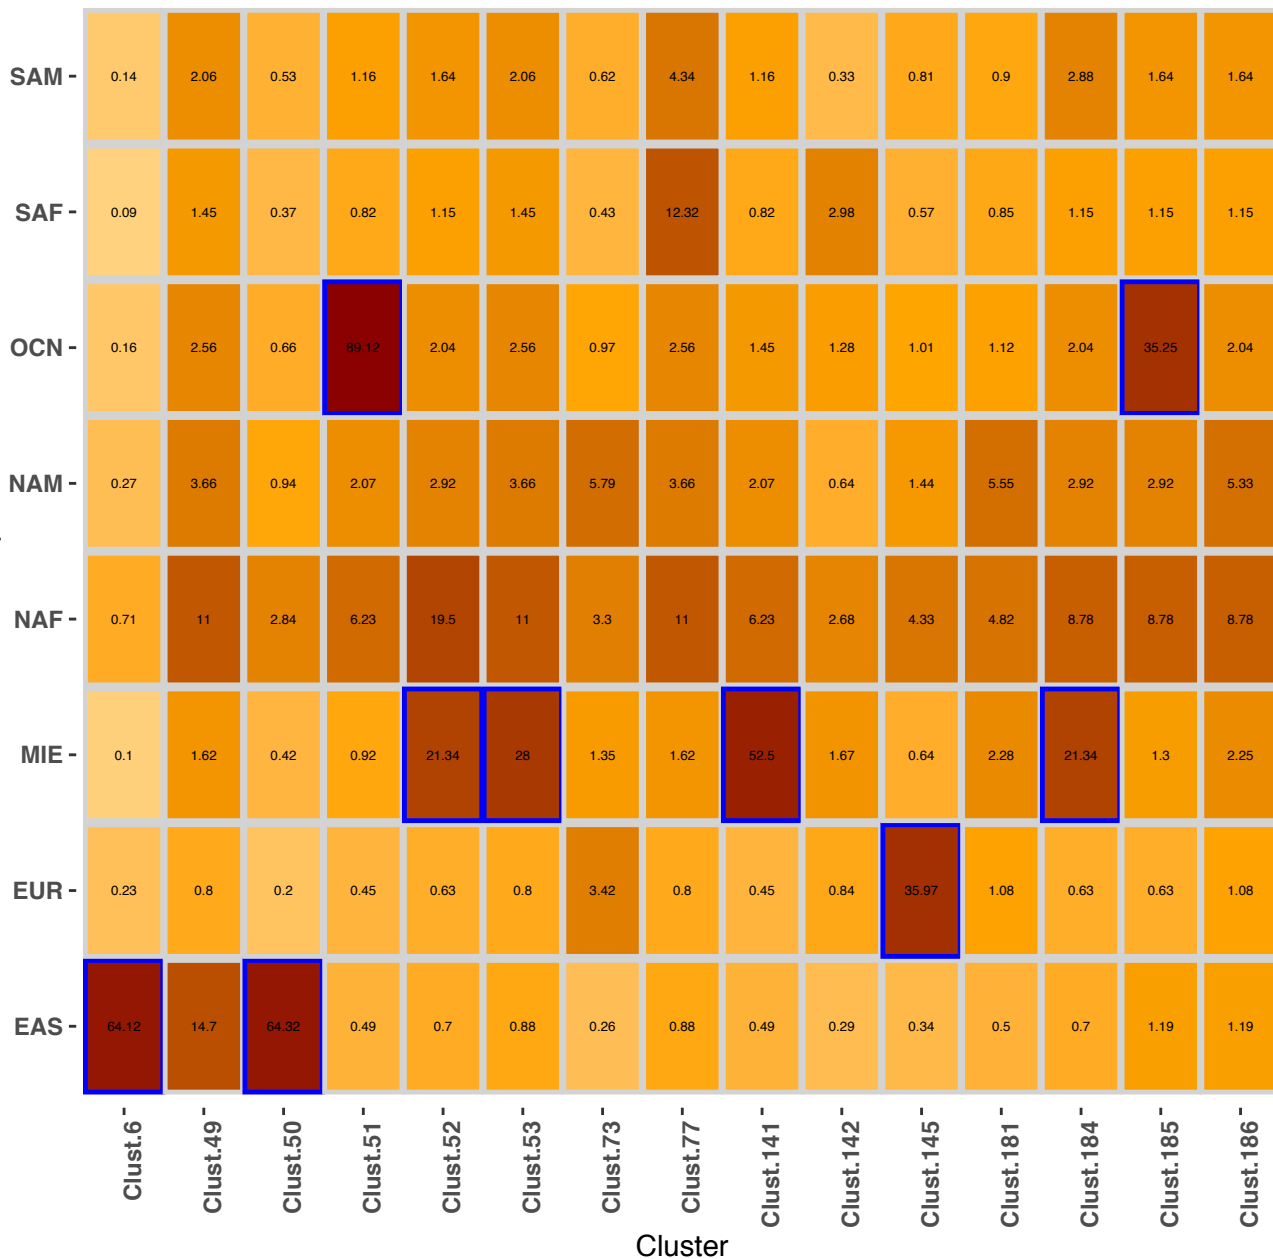



**BGLF4 : grouping per continent – Max MCC**

Pop

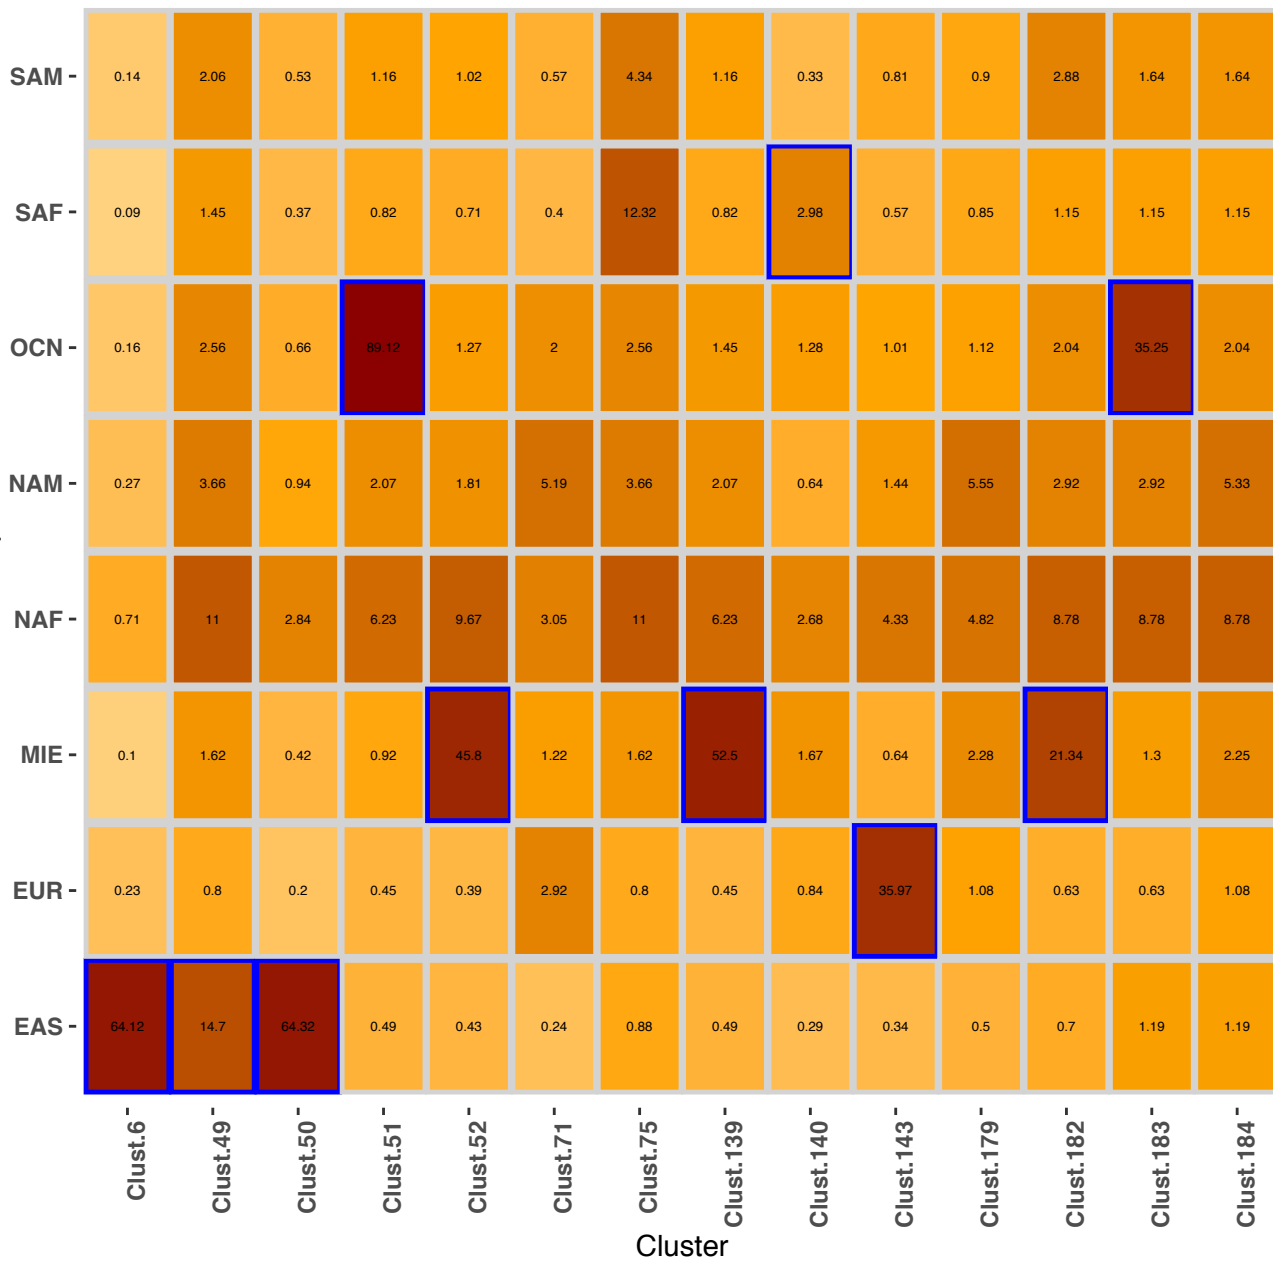



## BHRF1 : grouping per country – Max MCC

|       | Clust.2 | Clust.4 | Clust.17 | Clust.23 | Clust.75 | Clust.101 | Clust.103 | Clust.106 | Clust.156 | Clust.164 | Clust.165 |
|-------|---------|---------|----------|----------|----------|-----------|-----------|-----------|-----------|-----------|-----------|
| WG -  | 0.18    | 2.29    | 2.29     | 3.06     | 1.53     | 24.06     | 0.31      | 1.55      | 2.29      | 0.4       | 2.87      |
| USA - | 0.94    | 2.94    | 5.37     | 2.44     | 7.42     | 1.61      | 2.39      | 0.49      | 2.94      | 0.51      | 3.68      |
| UK -  | 0.65    | 1.24    | 1.24     | 1.03     | 3.51     | 0.91      | 2.72      | 1.12      | 1.24      | 0.24      | 1.56      |
| UG -  | 0.82    | 10.11   | 23.6     | 8.4      | 2.56     | 5.56      | 1.37      | 1.69      | 10.11     | 1.76      | 12.68     |
| TW -  | 25.83   | 11.83   | 11.83    | 9.83     | 2.99     | 6.5       | 1.6       | 1.98      | 11.83     | 2.06      | 14.83     |
| TU -  | 0.29    | 3.6     | 3.6      | 5.01     | 1.13     | 1.98      | 2.1       | 1.6       | 3.6       | 0.62      | 4.51      |
| SK -  | 12      | 35.9    | 35.9     | 29.83    | 9.08     | 19.72     | 4.85      | 6         | 35.9      | 6.24      | 45        |
| SA -  | 1.16    | 39.56   | 14.24    | 11.83    | 6.71     | 7.82      | 1.92      | 2.38      | 14.24     | 2.47      | 17.85     |
| PO -  | 0.52    | 6.36    | 6.36     | 5.29     | 1.61     | 5.49      | 4.61      | 5.88      | 6.36      | 1.1       | 7.98      |
| PN -  | 0.47    | 5.82    | 5.82     | 4.83     | 1.47     | 3.19      | 0.78      | 0.97      | 220.62    | 1.01      | 7.29      |
| NG -  | 1.95    | 23.87   | 23.87    | 19.83    | 6.04     | 13.11     | 3.23      | 3.99      | 23.87     | 4.15      | 29.92     |
| NAF - | 0.72    | 8.82    | 8.82     | 14.67    | 2.23     | 4.85      | 1.19      | 1.47      | 8.82      | 1.53      | 11.06     |
| KE -  | 0.19    | 2.38    | 2.38     | 1.98     | 0.6      | 1.31      | 0.32      | 1.62      | 2.38      | 0.41      | 2.98      |
| JP -  | 83.17   | 5.35    | 5.35     | 4.45     | 1.35     | 2.94      | 0.72      | 0.89      | 5.35      | 0.93      | 6.71      |
| IT -  | 0.19    | 2.38    | 2.38     | 8.88     | 0.72     | 1.31      | 4.17      | 17.12     | 2.38      | 0.41      | 2.98      |
| IN -  | 1.8     | 2.38    | 2.38     | 1.98     | 1.6      | 1.31      | 0.32      | 0.4       | 2.38      | 18.4      | 2.98      |
| HK -  | 2.32    | 5.82    | 5.82     | 4.83     | 1.47     | 3.19      | 0.78      | 0.97      | 5.82      | 49.48     | 7.29      |
| GH -  | 0.82    | 10.11   | 10.11    | 8.4      | 2.56     | 5.56      | 1.37      | 1.69      | 10.11     | 1.76      | 12.68     |
| GE -  | 2.93    | 35.9    | 35.9     | 29.83    | 9.08     | 19.72     | 4.85      | 6         | 35.9      | 6.24      | 45        |
| FR -  | 2.93    | 35.9    | 35.9     | 29.83    | 9.08     | 19.72     | 4.85      | 6         | 35.9      | 6.24      | 45        |
| CO -  | 0.44    | 10.55   | 5.35     | 4.45     | 1.35     | 2.94      | 0.72      | 0.89      | 5.35      | 0.93      | 6.71      |
| CH -  | 26.91   | 2.69    | 2.69     | 2.23     | 0.68     | 1.48      | 0.36      | 0.45      | 2.69      | 1.19      | 3.37      |
| BR -  | 0.82    | 10.11   | 10.11    | 8.4      | 2.56     | 5.56      | 1.37      | 1.69      | 10.11     | 1.76      | 12.68     |
| BO -  | 0.52    | 12.96   | 43.88    | 5.29     | 1.61     | 3.49      | 0.86      | 1.06      | 6.36      | 3.43      | 177       |
| AU -  | 0.3     | 3.24    | 3.24     | 2.69     | 0.82     | 2.53      | 3.75      | 0.54      | 3.24      | 0.56      | 4.06      |
| AR -  | 0.57    | 14.62   | 7.02     | 5.83     | 1.77     | 3.86      | 2.98      | 1.17      | 7.02      | 1.64      | 8.8       |
| AF -  | 0.72    | 8.82    | 8.82     | 7.33     | 2.23     | 4.85      | 1.19      | 1.47      | 8.82      | 1.53      | 11.06     |

# BHRF1 : grouping per continent – max CGS

Pop

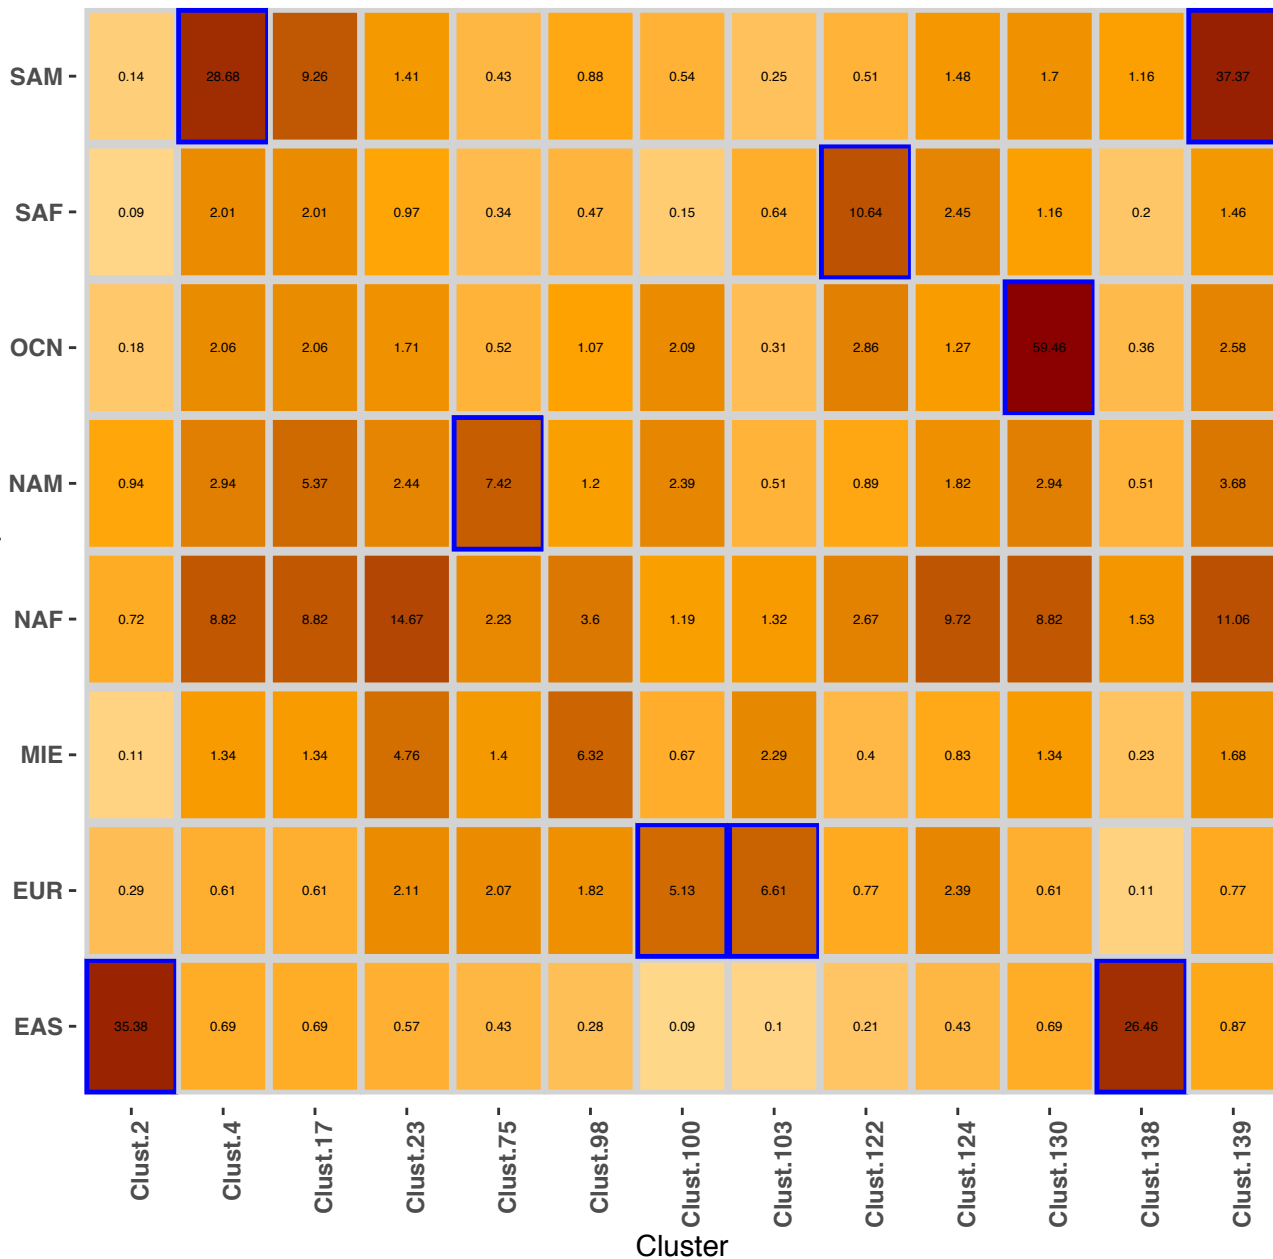

BHRF1 : grouping per continent – Max MCC

Pop

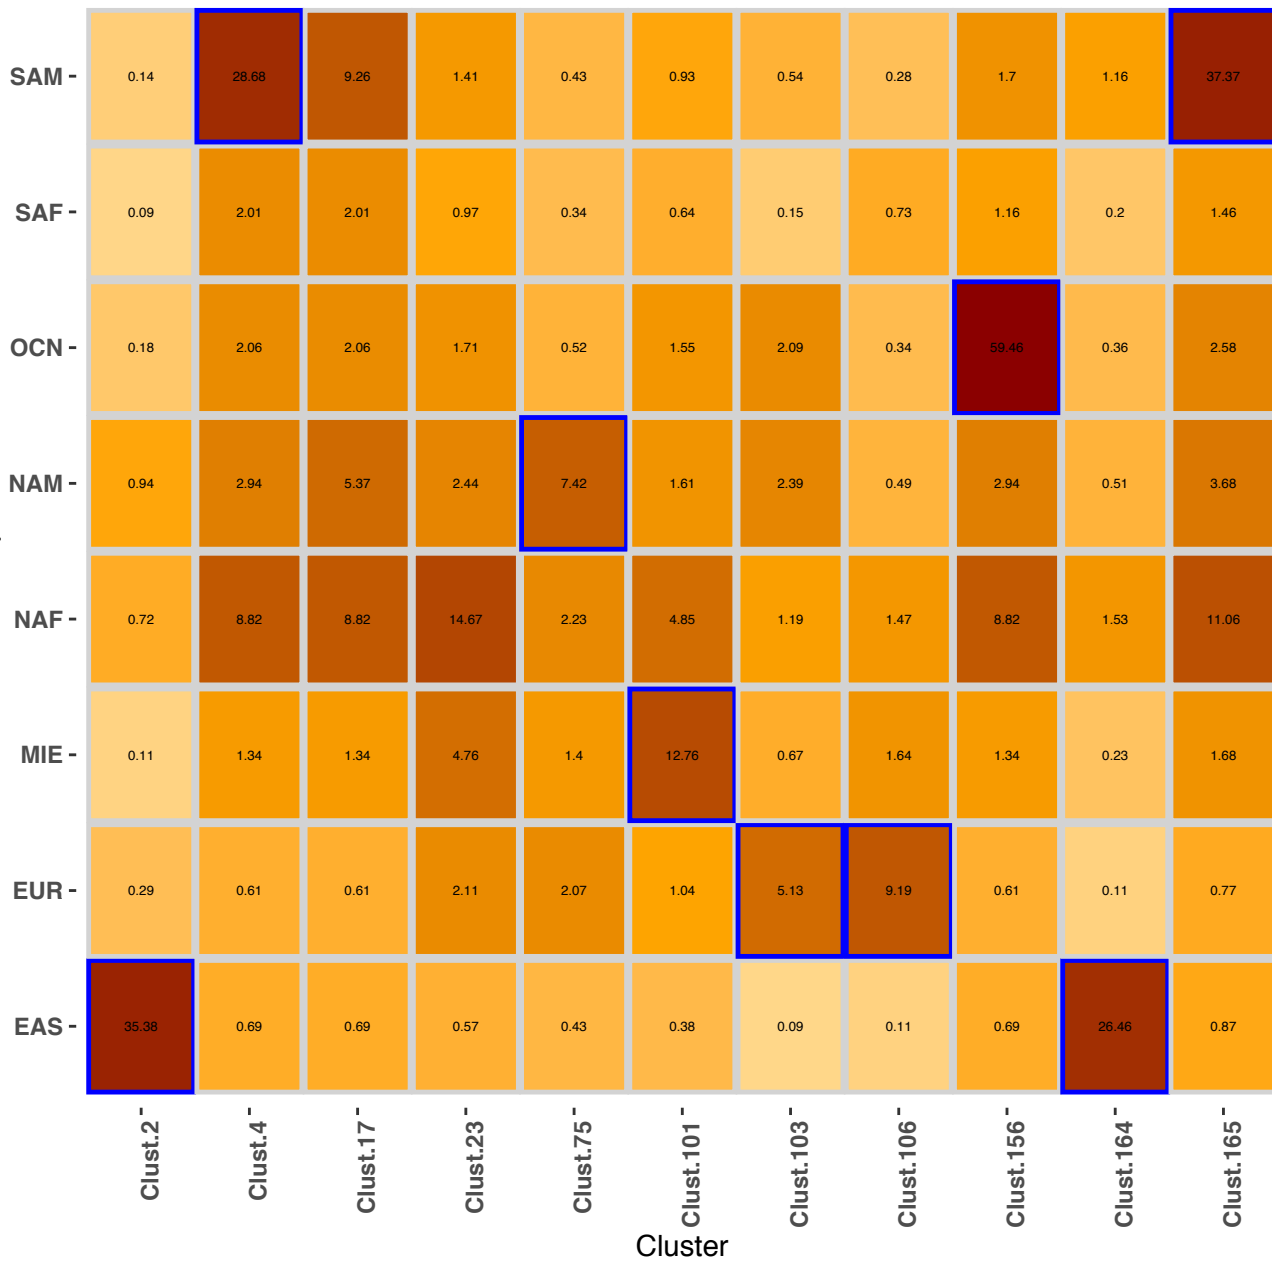

### BRLF1 : grouping per country – max CGS

| Pop   |  | Cluster |         |         |         |          |          |          |          |          |          |          |          |          |          |          |          |          |          |          |
|-------|--|---------|---------|---------|---------|----------|----------|----------|----------|----------|----------|----------|----------|----------|----------|----------|----------|----------|----------|----------|
|       |  | Clust.2 | Clust.3 | Clust.5 | Clust.6 | Clust.37 | Clust.39 | Clust.40 | Clust.43 | Clust.44 | Clust.45 | Clust.46 | Clust.48 | Clust.49 | Clust.51 | Clust.52 | Clust.64 | Clust.65 | Clust.70 | Clust.72 |
| WG -  |  | 0.56    | 0.39    | 1.49    | 2.1     | 12.92    | 13.42    | 3.74     | 1.49     | 1.49     | 0.36     | 2.63     | 2.63     | 1.49     | 1.88     | 2.19     | 2.1      | 2.1      | 2.63     | 2.1      |
| USA - |  | 0.95    | 0.65    | 37.11   | 2.9     | 1.29     | 1.09     | 2.9      | 3.15     | 2.06     | 0.5      | 3.63     | 3.63     | 8.3      | 1.23     | 1.05     | 2.9      | 2.9      | 3.63     | 2.9      |
| UK -  |  | 1.49    | 0.25    | 1.36    | 21.7    | 0.59     | 0.49     | 1.31     | 0.93     | 0.93     | 0.55     | 1.65     | 1.65     | 7.19     | 3.21     | 1.75     | 2.29     | 1.31     | 3.44     | 1.31     |
| UG -  |  | 2.67    | 1.88    | 7.08    | 9.97    | 4.45     | 3.75     | 23.27    | 7.08     | 7.08     | 1.73     | 12.5     | 12.5     | 7.08     | 0.57     | 0.91     | 9.97     | 9.97     | 12.5     | 9.97     |
| TW -  |  | 3.12    | 2.2     | 8.29    | 11.67   | 5.21     | 4.38     | 11.67    | 8.29     | 17.4     | 2.02     | 14.62    | 14.62    | 8.29     | 0.67     | 1.07     | 11.67    | 11.67    | 14.62    | 11.67    |
| TU -  |  | 0.95    | 0.67    | 2.52    | 3.55    | 5.19     | 1.76     | 3.55     | 2.52     | 2.52     | 0.61     | 4.45     | 42.38    | 2.52     | 1.19     | 3.65     | 3.55     | 3.55     | 4.45     | 3.55     |
| SK -  |  | 40.24   | 6.68    | 25.14   | 35.4    | 15.82    | 13.31    | 35.4     | 25.14    | 25.14    | 6.15     | 44.38    | 44.38    | 25.14    | 2.03     | 3.24     | 35.4     | 35.4     | 44.38    | 35.4     |
| SA -  |  | 3.76    | 2.65    | 9.97    | 14.04   | 43.25    | 5.28     | 14.04    | 9.97     | 9.97     | 2.44     | 17.6     | 17.6     | 9.97     | 0.8      | 1.28     | 14.04    | 14.04    | 17.6     | 14.04    |
| PO -  |  | 1.68    | 1.18    | 4.45    | 6.27    | 2.8      | 16.14    | 6.27     | 4.45     | 4.45     | 1.09     | 7.86     | 19.22    | 4.45     | 1.8      | 2.96     | 6.27     | 6.27     | 7.86     | 6.27     |
| PN -  |  | 1.53    | 14.39   | 4.07    | 5.73    | 2.56     | 2.15     | 5.73     | 19.06    | 4.07     | 0.99     | 7.19     | 7.19     | 4.07     | 0.33     | 0.52     | 5.73     | 5.73     | 7.19     | 5.73     |
| NG -  |  | 6.3     | 4.44    | 16.71   | 23.53   | 10.52    | 8.85     | 23.53    | 16.71    | 211.8    | 4.09     | 29.5     | 29.5     | 16.71    | 1.35     | 2.15     | 23.53    | 23.53    | 29.5     | 23.53    |
| NAF - |  | 2.33    | 1.64    | 6.18    | 8.7     | 3.89     | 3.27     | 8.7      | 6.18     | 11.53    | 1.51     | 10.91    | 10.91    | 6.18     | 0.68     | 2.72     | 8.7      | 8.7      | 10.91    | 19.33    |
| KE -  |  | 0.62    | 0.44    | 1.66    | 2.34    | 1.05     | 0.88     | 4.21     | 1.66     | 1.66     | 0.4      | 2.94     | 2.94     | 1.66     | 0.13     | 0.21     | 2.34     | 2.34     | 2.94     | 2.34     |
| JP -  |  | 28      | 1.18    | 4.45    | 6.27    | 2.8      | 2.36     | 6.27     | 4.45     | 4.45     | 1.44     | 7.86     | 7.86     | 4.45     | 0.36     | 0.57     | 12.78    | 12.78    | 7.86     | 6.27     |
| IT -  |  | 0.62    | 0.44    | 2.51    | 2.34    | 1.05     | 0.88     | 2.34     | 1.66     | 1.66     | 0.4      | 2.94     | 2.94     | 1.66     | 7.46     | 4.67     | 2.34     | 2.34     | 2.94     | 2.34     |
| IN -  |  | 0.76    | 58.73   | 1.66    | 4.21    | 1.05     | 1.12     | 2.34     | 1.66     | 1.66     | 0.47     | 2.94     | 2.94     | 1.66     | 0.15     | 0.21     | 2.34     | 2.34     | 6.33     | 2.34     |
| HK -  |  | 4.92    | 1.08    | 4.07    | 5.73    | 2.56     | 2.15     | 5.73     | 4.07     | 4.07     | 87.35    | 7.19     | 7.19     | 4.07     | 0.33     | 0.52     | 5.73     | 5.73     | 7.19     | 5.73     |
| GH -  |  | 2.67    | 1.88    | 7.08    | 9.97    | 4.45     | 3.75     | 9.97     | 7.08     | 7.08     | 1.73     | 12.5     | 12.5     | 7.08     | 0.57     | 0.91     | 9.97     | 9.97     | 35       | 87.5     |
| GE -  |  | 9.47    | 6.68    | 25.14   | 35.4    | 15.82    | 13.31    | 35.4     | 25.14    | 25.14    | 6.15     | 44.38    | 44.38    | 25.14    | 8.26     | 3.24     | 35.4     | 35.4     | 44.38    | 35.4     |
| FR -  |  | 9.47    | 6.68    | 25.14   | 35.4    | 15.82    | 13.31    | 35.4     | 25.14    | 25.14    | 6.15     | 44.38    | 44.38    | 25.14    | 8.26     | 3.24     | 35.4     | 35.4     | 44.38    | 35.4     |
| CO -  |  | 1.68    | 1.18    | 4.45    | 6.27    | 2.8      | 2.36     | 12.78    | 4.45     | 4.45     | 1.09     | 7.86     | 7.86     | 4.45     | 0.36     | 0.57     | 6.27     | 6.27     | 7.86     | 6.27     |
| CH -  |  | 1.93    | 1.29    | 1.88    | 2.65    | 1.18     | 0.99     | 2.65     | 2.86     | 2.86     | 29.18    | 3.32     | 3.32     | 1.88     | 0.15     | 0.24     | 15.09    | 4.8      | 3.32     | 2.65     |
| BR -  |  | 4.2     | 1.88    | 7.08    | 9.97    | 4.45     | 3.75     | 9.97     | 7.08     | 7.08     | 1.73     | 12.5     | 12.5     | 7.08     | 0.57     | 0.91     | 9.97     | 9.97     | 12.5     | 9.97     |
| BO -  |  | 1.53    | 1.08    | 4.07    | 5.73    | 2.56     | 2.15     | 5.73     | 19.06    | 4.07     | 0.99     | 154.67   | 7.19     | 4.07     | 0.91     | 0.52     | 5.73     | 11.47    | 7.19     | 5.73     |
| AU -  |  | 1.06    | 0.6     | 2.27    | 3.19    | 1.42     | 1.56     | 3.19     | 2.27     | 2.27     | 0.55     | 4        | 4        | 3.51     | 3.72     | 2.35     | 3.19     | 3.19     | 4        | 3.19     |
| AR -  |  | 2.06    | 1.45    | 5.48    | 7.71    | 5.41     | 2.9      | 7.71     | 5.48     | 5.48     | 1.34     | 9.67     | 9.67     | 5.48     | 0.44     | 0.7      | 7.71     | 16.52    | 9.67     | 7.71     |
| AF -  |  | 2.33    | 1.64    | 6.18    | 8.7     | 3.89     | 3.27     | 8.7      | 6.18     | 11.53    | 1.51     | 10.91    | 10.91    | 6.18     | 0.5      | 2.72     | 8.7      | 8.7      | 10.91    | 19.33    |

## BRLF1 : grouping per country – Max MCC

| Pop |   | Cluster |         |         |         |          |          |          |          |          |          |          |          |          |          |          |          |          |          |
|-----|---|---------|---------|---------|---------|----------|----------|----------|----------|----------|----------|----------|----------|----------|----------|----------|----------|----------|----------|
|     |   | Clust.2 | Clust.3 | Clust.5 | Clust.6 | Clust.47 | Clust.48 | Clust.51 | Clust.52 | Clust.53 | Clust.54 | Clust.56 | Clust.57 | Clust.59 | Clust.60 | Clust.72 | Clust.73 | Clust.78 | Clust.80 |
| WG  | - | 0.56    | 0.39    | 1.49    | 2.1     | 13.42    | 3.74     | 1.49     | 1.49     | 0.36     | 2.63     | 2.63     | 1.49     | 1.88     | 2.19     | 2.1      | 2.1      | 2.63     | 2.1      |
| USA | - | 0.95    | 0.65    | 37.11   | 2.9     | 1.09     | 2.9      | 3.15     | 2.06     | 0.5      | 3.63     | 3.63     | 8.3      | 1.23     | 1.05     | 2.9      | 2.9      | 3.63     | 2.9      |
| UK  | - | 1.49    | 0.25    | 1.36    | 21.7    | 0.49     | 1.31     | 0.93     | 0.93     | 0.55     | 1.65     | 1.65     | 7.19     | 3.21     | 1.75     | 2.29     | 1.31     | 3.44     | 1.31     |
| UG  | - | 2.67    | 1.88    | 7.08    | 9.97    | 3.75     | 23.27    | 7.08     | 7.08     | 1.73     | 12.5     | 12.5     | 7.08     | 0.57     | 0.91     | 9.97     | 9.97     | 12.5     | 9.97     |
| TW  | - | 3.12    | 2.2     | 8.29    | 11.67   | 4.38     | 11.67    | 8.29     | 17.4     | 2.02     | 14.62    | 14.62    | 8.29     | 0.67     | 1.07     | 11.67    | 11.67    | 14.62    | 11.67    |
| TU  | - | 0.95    | 0.67    | 2.52    | 3.55    | 1.76     | 3.55     | 2.52     | 2.52     | 0.61     | 4.45     | 42.38    | 2.52     | 1.19     | 3.65     | 3.55     | 3.55     | 4.45     | 3.55     |
| SK  | - | 40.24   | 6.68    | 25.14   | 35.4    | 13.31    | 35.4     | 25.14    | 25.14    | 6.15     | 44.38    | 44.38    | 25.14    | 2.03     | 3.24     | 35.4     | 35.4     | 44.38    | 35.4     |
| SA  | - | 3.76    | 2.65    | 9.97    | 14.04   | 5.28     | 14.04    | 9.97     | 9.97     | 2.44     | 17.6     | 17.6     | 9.97     | 0.8      | 1.28     | 14.04    | 14.04    | 17.6     | 14.04    |
| PO  | - | 1.68    | 1.18    | 4.45    | 6.27    | 16.14    | 6.27     | 4.45     | 4.45     | 1.09     | 7.86     | 19.22    | 4.45     | 1.8      | 2.96     | 6.27     | 6.27     | 7.86     | 6.27     |
| PN  | - | 1.53    | 14.39   | 4.07    | 5.73    | 2.15     | 5.73     | 19.06    | 4.07     | 0.99     | 7.19     | 7.19     | 4.07     | 0.33     | 0.52     | 5.73     | 5.73     | 7.19     | 5.73     |
| NG  | - | 6.3     | 4.44    | 16.71   | 23.53   | 8.85     | 23.53    | 16.71    | 211.8    | 4.09     | 29.5     | 29.5     | 16.71    | 1.35     | 2.15     | 23.53    | 23.53    | 29.5     | 23.53    |
| NAF | - | 2.33    | 1.64    | 6.18    | 8.7     | 3.27     | 8.7      | 6.18     | 11.53    | 1.51     | 10.91    | 10.91    | 6.18     | 0.68     | 2.72     | 8.7      | 8.7      | 10.91    | 19.33    |
| KE  | - | 0.62    | 0.44    | 1.66    | 2.34    | 0.88     | 4.21     | 1.66     | 1.66     | 0.4      | 2.94     | 2.94     | 1.66     | 0.13     | 0.21     | 2.34     | 2.34     | 2.94     | 2.34     |
| JP  | - | 28      | 1.18    | 4.45    | 6.27    | 2.36     | 6.27     | 4.45     | 4.45     | 1.44     | 7.86     | 7.86     | 4.45     | 0.36     | 0.57     | 12.78    | 12.78    | 7.86     | 6.27     |
| IT  | - | 0.62    | 0.44    | 2.51    | 2.34    | 0.88     | 2.34     | 1.66     | 1.66     | 0.4      | 2.94     | 2.94     | 1.66     | 7.46     | 4.67     | 2.34     | 2.34     | 2.94     | 2.34     |
| IN  | - | 0.76    | 58.73   | 1.66    | 4.21    | 1.12     | 2.34     | 1.66     | 1.66     | 0.47     | 2.94     | 2.94     | 1.66     | 0.15     | 0.21     | 2.34     | 2.34     | 6.33     | 2.34     |
| HK  | - | 4.92    | 1.08    | 4.07    | 5.73    | 2.15     | 5.73     | 4.07     | 4.07     | 87.35    | 7.19     | 7.19     | 4.07     | 0.33     | 0.52     | 5.73     | 5.73     | 7.19     | 5.73     |
| GH  | - | 2.67    | 1.88    | 7.08    | 9.97    | 3.75     | 9.97     | 7.08     | 7.08     | 1.73     | 12.5     | 12.5     | 7.08     | 0.57     | 0.91     | 9.97     | 9.97     | 35       | 87.5     |
| GE  | - | 9.47    | 6.68    | 25.14   | 35.4    | 13.31    | 35.4     | 25.14    | 25.14    | 6.15     | 44.38    | 44.38    | 25.14    | 8.26     | 3.24     | 35.4     | 35.4     | 44.38    | 35.4     |
| FR  | - | 9.47    | 6.68    | 25.14   | 35.4    | 13.31    | 35.4     | 25.14    | 25.14    | 6.15     | 44.38    | 44.38    | 25.14    | 8.26     | 3.24     | 35.4     | 35.4     | 44.38    | 35.4     |
| CO  | - | 1.68    | 1.18    | 4.45    | 6.27    | 2.36     | 12.78    | 4.45     | 4.45     | 1.09     | 7.86     | 7.86     | 4.45     | 0.36     | 0.57     | 6.27     | 6.27     | 7.86     | 6.27     |
| CH  | - | 1.93    | 1.29    | 1.88    | 2.65    | 0.99     | 2.65     | 2.86     | 2.86     | 29.18    | 3.32     | 3.32     | 1.88     | 0.15     | 0.24     | 15.09    | 4.8      | 3.32     | 2.65     |
| BR  | - | 4.2     | 1.88    | 7.08    | 9.97    | 3.75     | 9.97     | 7.08     | 7.08     | 1.73     | 12.5     | 12.5     | 7.08     | 0.57     | 0.91     | 9.97     | 9.97     | 12.5     | 9.97     |
| BO  | - | 1.53    | 1.08    | 4.07    | 5.73    | 2.15     | 5.73     | 19.06    | 4.07     | 0.99     | 154.67   | 7.19     | 4.07     | 0.91     | 0.52     | 5.73     | 11.47    | 7.19     | 5.73     |
| AU  | - | 1.06    | 0.6     | 2.27    | 3.19    | 1.56     | 3.19     | 2.27     | 2.27     | 0.55     | 4        | 4        | 3.51     | 3.72     | 2.35     | 3.19     | 3.19     | 4        | 3.19     |
| AR  | - | 2.06    | 1.45    | 5.48    | 7.71    | 2.9      | 7.71     | 5.48     | 5.48     | 1.34     | 9.67     | 9.67     | 5.48     | 0.44     | 0.7      | 7.71     | 16.52    | 9.67     | 7.71     |
| AF  | - | 2.33    | 1.64    | 6.18    | 8.7     | 3.27     | 8.7      | 6.18     | 11.53    | 1.51     | 10.91    | 10.91    | 6.18     | 0.5      | 2.72     | 8.7      | 8.7      | 10.91    | 19.33    |

# BRLF1 : grouping per continent – max CGS

Pop

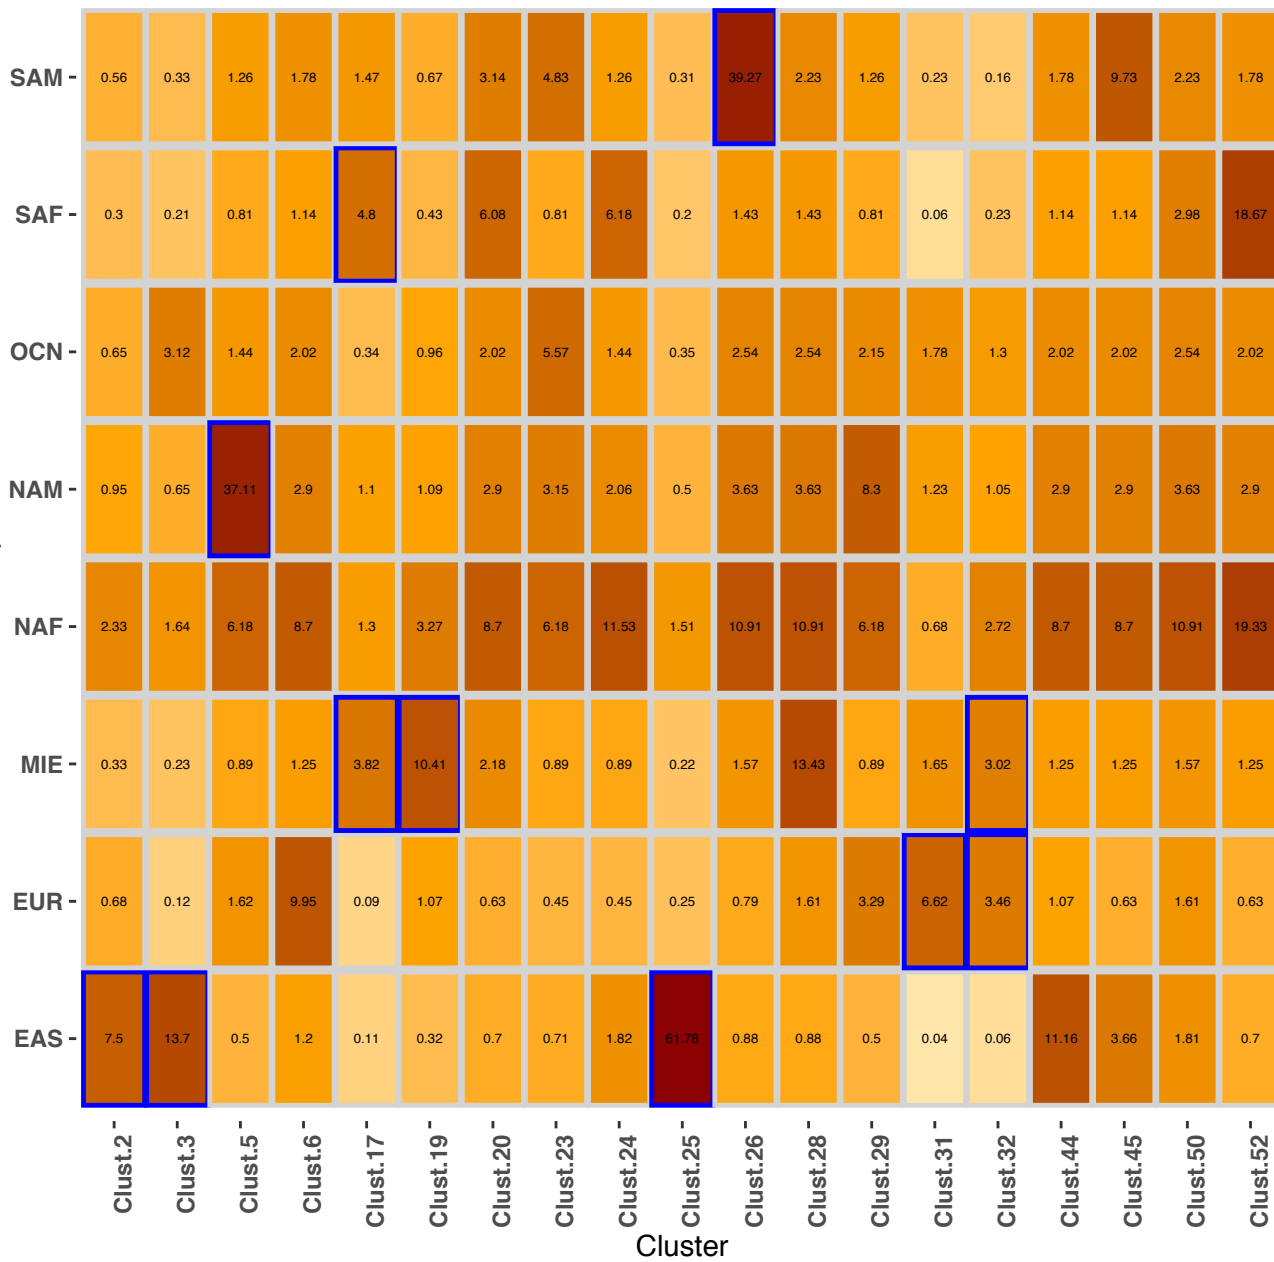



BRLF1 : grouping per continent – Max MCC

Pop

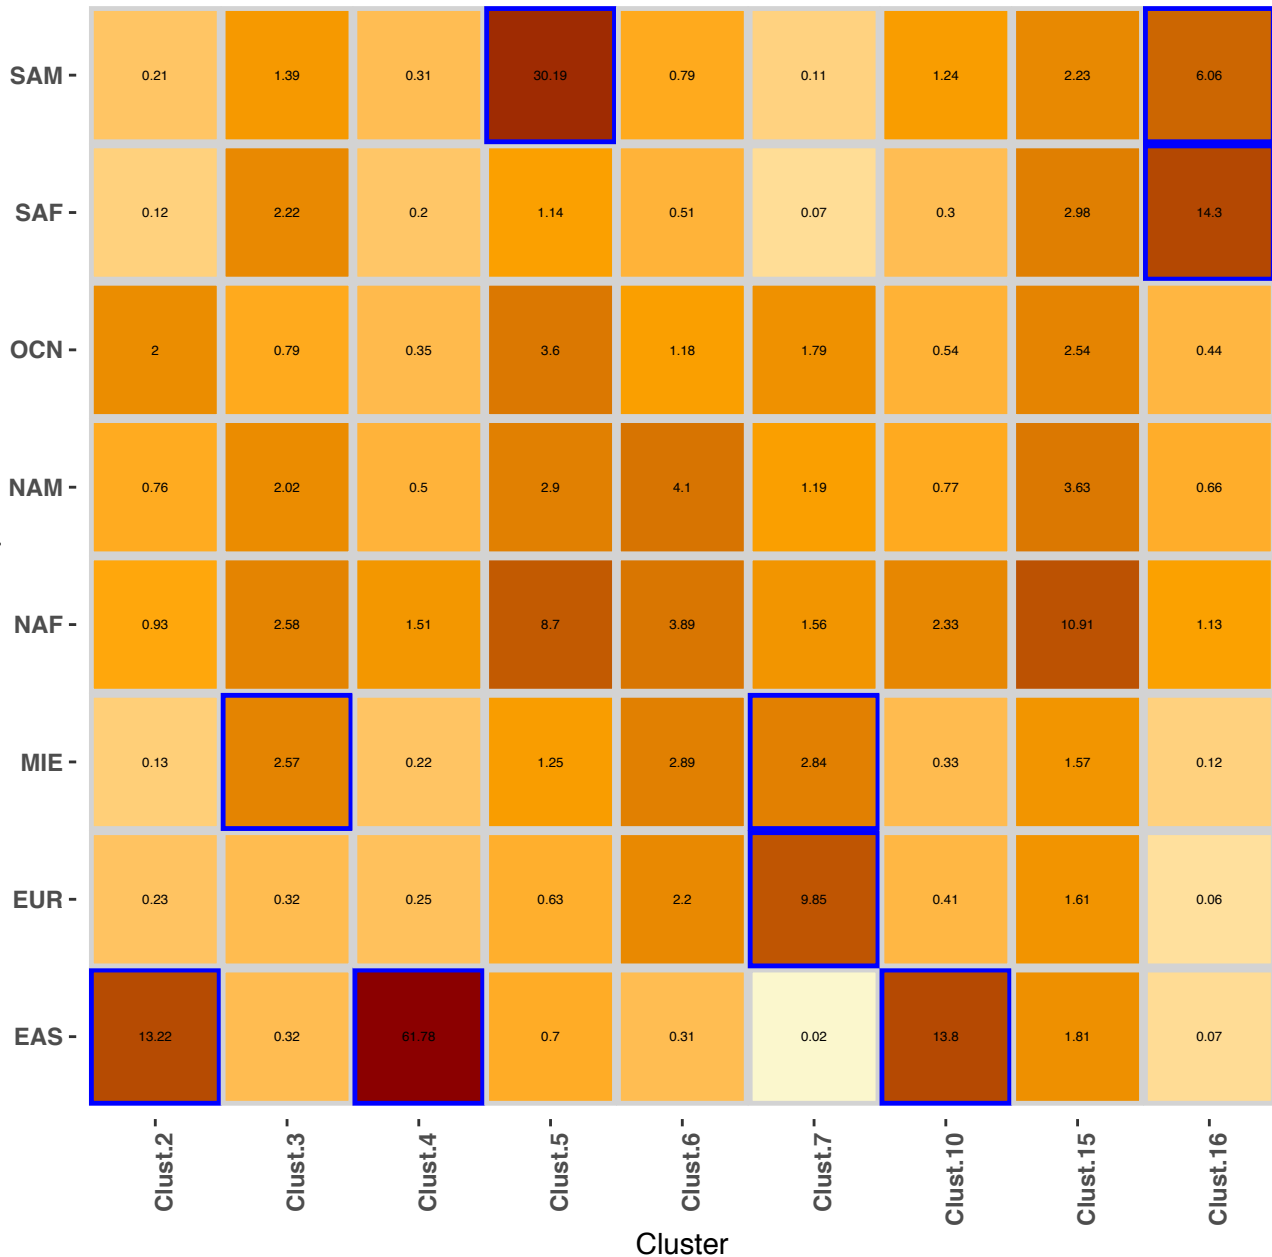

# BZLF1 : grouping per country – max CGS

Pop

|       |       |        |       |       |       |       |       |
|-------|-------|--------|-------|-------|-------|-------|-------|
| WG -  | 2.16  | 0.72   | 2.64  | 2.1   | 0.27  | 0.43  | 2.1   |
| USA - | 0.8   | 2.19   | 3.48  | 2.77  | 0.36  | 1.5   | 2.77  |
| UK -  | 0.36  | 0.36   | 1.61  | 1.29  | 0.39  | 3.46  | 2.24  |
| UG -  | 0.45  | 2.84   | 12.54 | 10    | 1.31  | 2.06  | 10    |
| TW -  | 0.57  | 3.32   | 14.67 | 11.7  | 2.43  | 2.41  | 11.7  |
| TU -  | 0.88  | 1.01   | 4.46  | 6.63  | 0.46  | 0.73  | 3.56  |
| SK -  | 1.14  | 10.09  | 44.5  | 35.5  | 4.64  | 7.33  | 35.5  |
| SA -  | 2.32  | 7.56   | 17.65 | 14.08 | 1.84  | 2.9   | 14.08 |
| PO -  | 0.98  | 1.79   | 7.89  | 12.81 | 0.82  | 4.11  | 6.29  |
| PN -  | 1.32  | 1.63   | 7.21  | 5.75  | 20.81 | 1.18  | 5.75  |
| NG -  | 6.97  | 6.71   | 29.58 | 23.6  | 3.09  | 4.87  | 23.6  |
| NAF - | 1.74  | 2.48   | 10.94 | 8.72  | 1.14  | 1.8   | 19.39 |
| KE -  | 1.38  | 0.81   | 2.95  | 2.35  | 0.31  | 0.48  | 2.35  |
| JP -  | 0.57  | 1.79   | 175   | 6.29  | 2.48  | 1.74  | 6.29  |
| IT -  | 0.08  | 4.64   | 2.95  | 13.2  | 0.31  | 1.25  | 4.22  |
| IN -  | 0.5   | 0.67   | 2.95  | 2.35  | 31.5  | 0.48  | 2.35  |
| HK -  | 11.16 | 1.63   | 7.21  | 5.75  | 0.75  | 1.18  | 5.75  |
| GH -  | 0.45  | 155.45 | 12.54 | 10    | 1.31  | 2.06  | 10    |
| GE -  | 1.14  | 10.09  | 44.5  | 35.5  | 4.64  | 7.33  | 35.5  |
| FR -  | 1.14  | 10.09  | 44.5  | 35.5  | 4.64  | 7.33  | 35.5  |
| CO -  | 1.15  | 2.79   | 8.7   | 6.94  | 0.91  | 1.43  | 6.94  |
| CH -  | 8.04  | 0.75   | 3.33  | 2.66  | 0.86  | 0.55  | 2.66  |
| BR -  | 1.15  | 4.51   | 12.54 | 10    | 1.31  | 2.06  | 10    |
| BO -  | 0.5   | 1.63   | 7.21  | 5.75  | 2.19  | 16.23 | 5.75  |
| AU -  | 0.24  | 0.91   | 4.01  | 3.2   | 0.42  | 2.97  | 3.2   |
| AR -  | 1.39  | 2.2    | 9.69  | 7.73  | 1.38  | 1.59  | 7.73  |
| AF -  | 1.74  | 2.48   | 10.94 | 8.72  | 1.14  | 1.8   | 19.39 |

Clust.1

Clust.104

Clust.105

Clust.116

Clust.122

Clust.124

Clust.125

Cluster

# BZLF1 : grouping per country – Max MCC

Pop

| WG -  | 2.16    | 0.72      | 2.64      | 2.1       | 0.27      | 0.43      | 2.1       |
|-------|---------|-----------|-----------|-----------|-----------|-----------|-----------|
| USA - | 0.8     | 2.19      | 3.48      | 2.77      | 0.36      | 1.5       | 2.77      |
| UK -  | 0.36    | 0.36      | 1.61      | 1.29      | 0.39      | 3.46      | 2.24      |
| UG -  | 0.45    | 2.84      | 12.54     | 10        | 1.31      | 2.06      | 10        |
| TW -  | 0.57    | 3.32      | 14.67     | 11.7      | 2.43      | 2.41      | 11.7      |
| TU -  | 0.88    | 1.01      | 4.46      | 6.63      | 0.46      | 0.73      | 3.56      |
| SK -  | 1.14    | 10.09     | 44.5      | 35.5      | 4.64      | 7.33      | 35.5      |
| SA -  | 2.32    | 7.56      | 17.65     | 14.08     | 1.84      | 2.9       | 14.08     |
| PO -  | 0.98    | 1.79      | 7.89      | 12.81     | 0.82      | 4.11      | 6.29      |
| PN -  | 1.32    | 1.63      | 7.21      | 5.75      | 20.81     | 1.18      | 5.75      |
| NG -  | 6.97    | 6.71      | 29.58     | 23.6      | 3.09      | 4.87      | 23.6      |
| NAF - | 1.74    | 2.48      | 10.94     | 8.72      | 1.14      | 1.8       | 19.39     |
| KE -  | 1.38    | 0.81      | 2.95      | 2.35      | 0.31      | 0.48      | 2.35      |
| JP -  | 0.57    | 1.79      | 175       | 6.29      | 2.48      | 1.74      | 6.29      |
| IT -  | 0.08    | 4.64      | 2.95      | 13.2      | 0.31      | 1.25      | 4.22      |
| IN -  | 0.5     | 0.67      | 2.95      | 2.35      | 31.5      | 0.48      | 2.35      |
| HK -  | 11.16   | 1.63      | 7.21      | 5.75      | 0.75      | 1.18      | 5.75      |
| GH -  | 0.45    | 155.45    | 12.54     | 10        | 1.31      | 2.06      | 10        |
| GE -  | 1.14    | 10.09     | 44.5      | 35.5      | 4.64      | 7.33      | 35.5      |
| FR -  | 1.14    | 10.09     | 44.5      | 35.5      | 4.64      | 7.33      | 35.5      |
| CO -  | 1.15    | 2.79      | 8.7       | 6.94      | 0.91      | 1.43      | 6.94      |
| CH -  | 8.04    | 0.75      | 3.33      | 2.66      | 0.86      | 0.55      | 2.66      |
| BR -  | 1.15    | 4.51      | 12.54     | 10        | 1.31      | 2.06      | 10        |
| BO -  | 0.5     | 1.63      | 7.21      | 5.75      | 2.19      | 16.23     | 5.75      |
| AU -  | 0.24    | 0.91      | 4.01      | 3.2       | 0.42      | 2.97      | 3.2       |
| AR -  | 1.39    | 2.2       | 9.69      | 7.73      | 1.38      | 1.59      | 7.73      |
| AF -  | 1.74    | 2.48      | 10.94     | 8.72      | 1.14      | 1.8       | 19.39     |
|       | Clust.1 | Clust.104 | Clust.105 | Clust.116 | Clust.122 | Clust.124 | Clust.125 |

Cluster

# BZLF1 : grouping per continent – max CGS

Pop

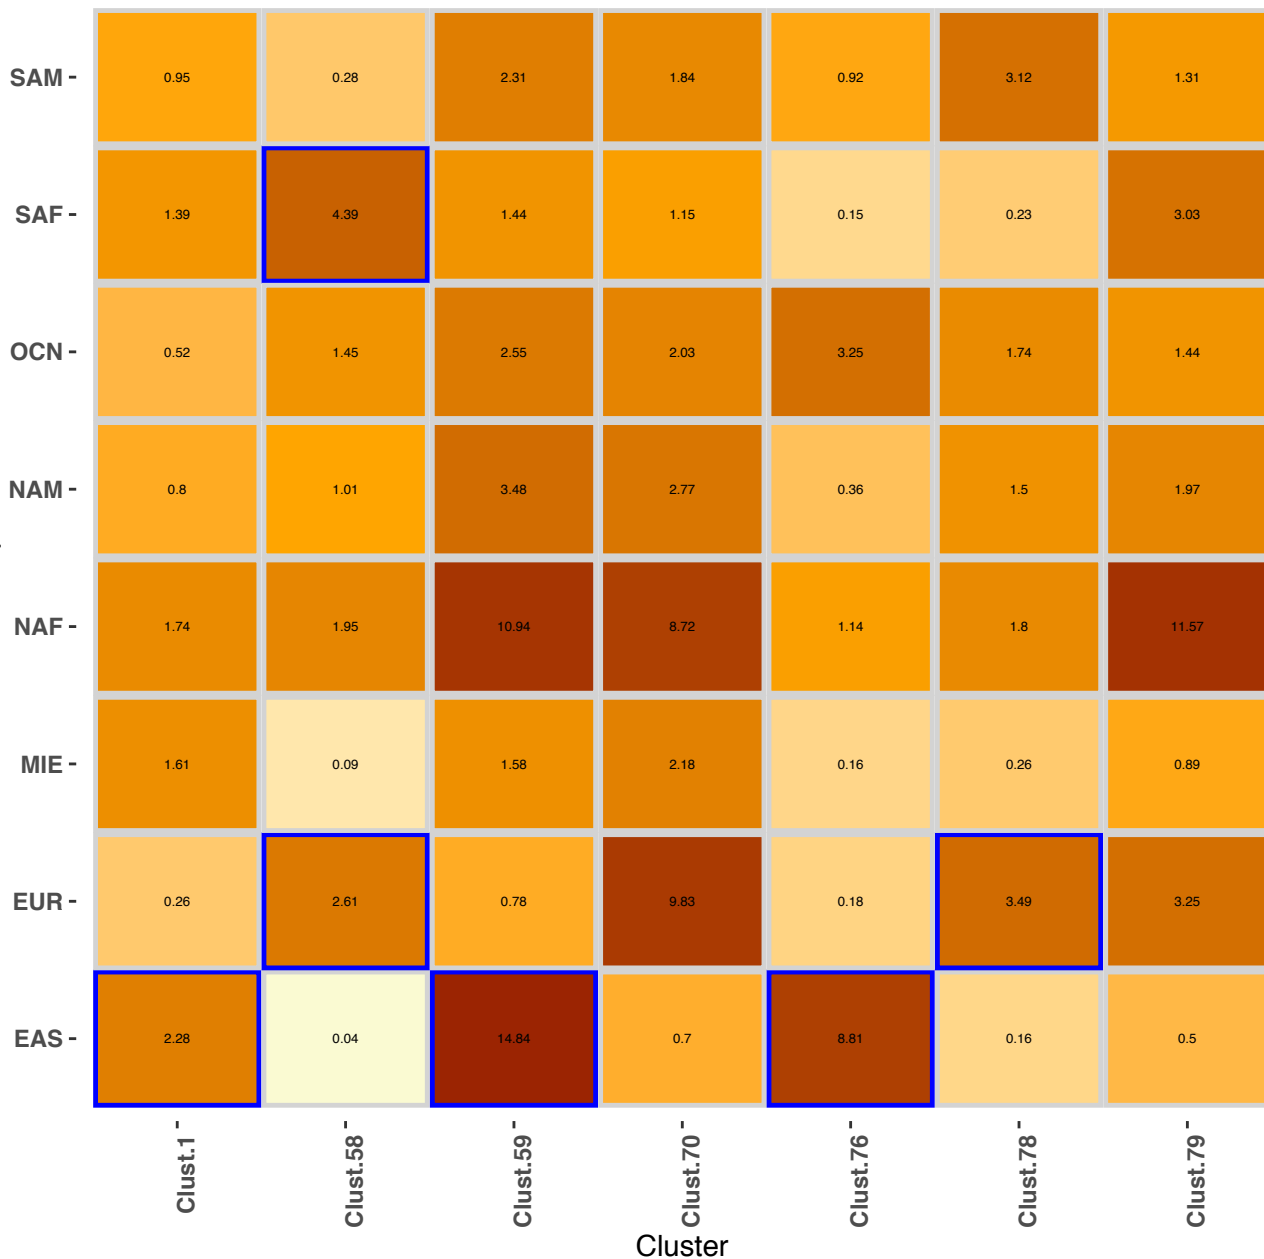

**BZLF1 : grouping per continent – Max MCC**

Pop

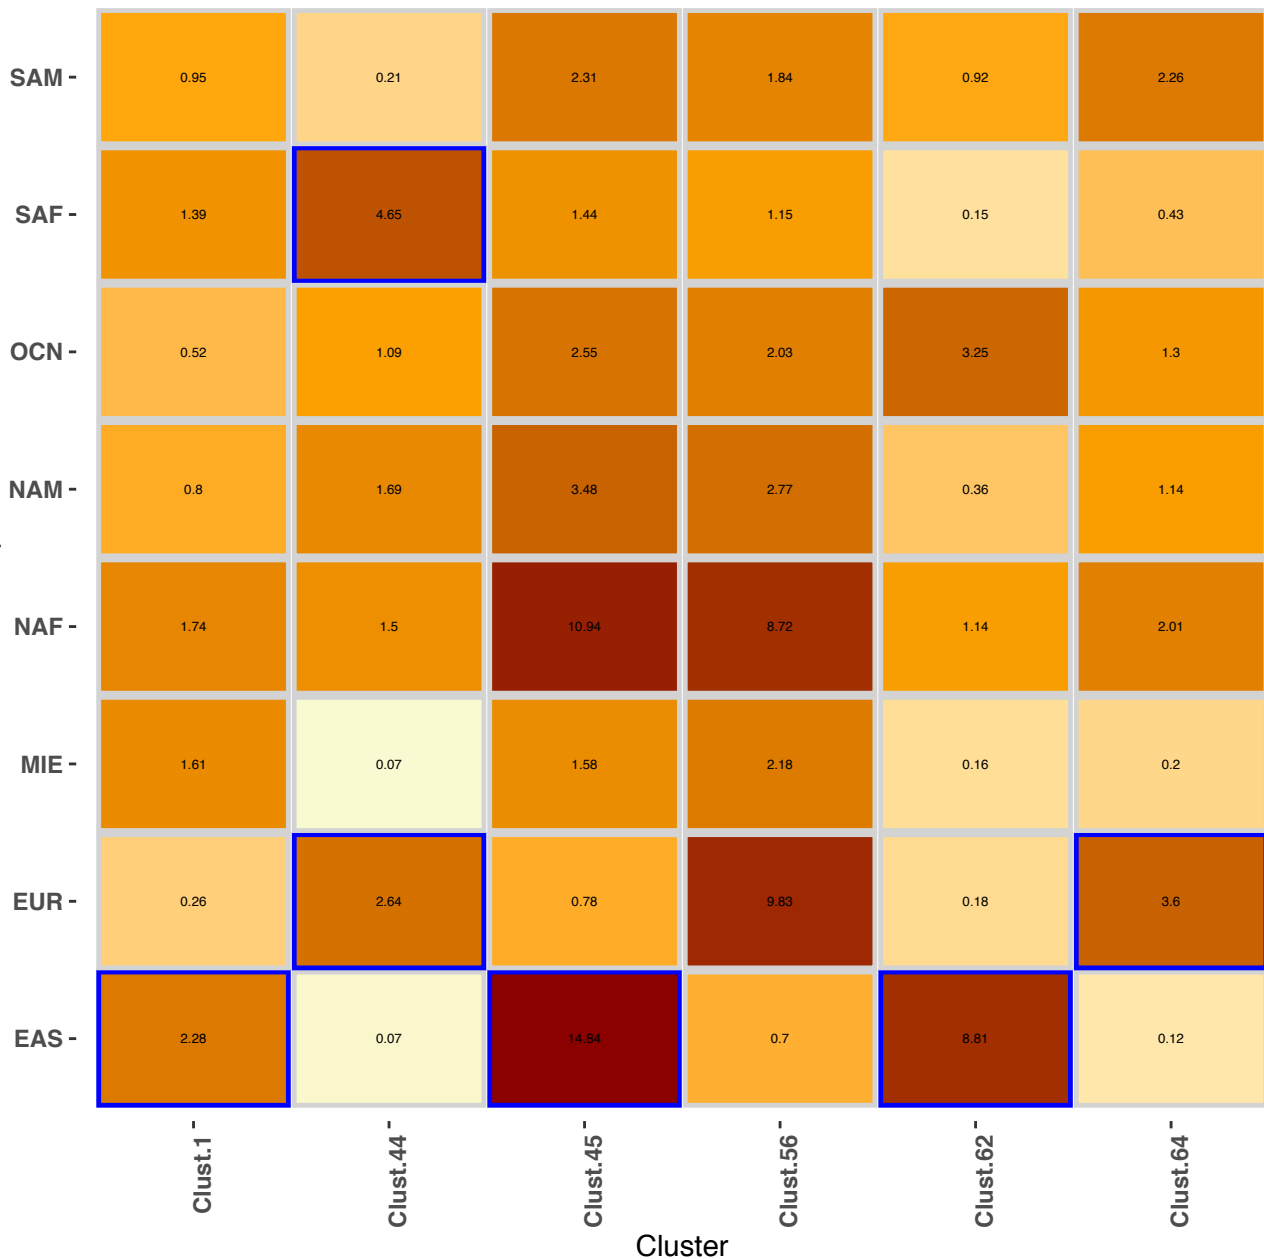

# EBER-1 : grouping per country – max CGS

Pop

|       |        |       |       |       |        |
|-------|--------|-------|-------|-------|--------|
| WG -  | 2.66   | 1.18  | 2.66  | 2.12  | 2.66   |
| USA - | 3.54   | 1.32  | 3.54  | 2.83  | 3.54   |
| UK -  | 1.61   | 0.16  | 1.61  | 1.28  | 1.61   |
| UG -  | 12.21  | 0.15  | 12.21 | 9.74  | 12.21  |
| TW -  | 14.29  | 0.18  | 14.29 | 11.4  | 14.29  |
| TU -  | 4.88   | 3.42  | 4.88  | 3.89  | 4.88   |
| SK -  | 43.38  | 2.18  | 43.38 | 34.6  | 43.38  |
| SA -  | 17.2   | 3.29  | 17.2  | 13.72 | 17.2   |
| PO -  | 8.47   | 2.21  | 8.47  | 6.76  | 8.47   |
| PN -  | 7.02   | 0.08  | 7.02  | 5.6   | 151.11 |
| NG -  | 28.83  | 1.08  | 28.83 | 23    | 28.83  |
| NAF - | 12.21  | 0.54  | 12.21 | 9.74  | 12.21  |
| KE -  | 2.87   | 4.19  | 2.87  | 2.29  | 2.87   |
| JP -  | 7.68   | 0.12  | 7.68  | 6.13  | 7.68   |
| IT -  | 2.87   | 0.86  | 2.87  | 2.29  | 2.87   |
| IN -  | 2.87   | 0.03  | 25.76 | 40.25 | 2.87   |
| HK -  | 7.02   | 11.46 | 7.02  | 5.6   | 7.02   |
| GH -  | 12.21  | 5.55  | 12.21 | 9.74  | 12.21  |
| GE -  | 43.38  | 2.18  | 43.38 | 34.6  | 43.38  |
| FR -  | 43.38  | 0.54  | 43.38 | 34.6  | 43.38  |
| CO -  | 8.47   | 11.44 | 8.47  | 6.76  | 8.47   |
| CH -  | 3.24   | 31.55 | 3.24  | 2.58  | 3.24   |
| BR -  | 12.21  | 5.55  | 12.21 | 22.73 | 12.21  |
| BO -  | 195.43 | 2.21  | 8.47  | 6.76  | 8.47   |
| AU -  | 3.9    | 0.71  | 8.63  | 3.11  | 3.9    |
| AR -  | 9.44   | 3.33  | 9.44  | 7.53  | 9.44   |
| AF -  | 10.66  | 0.18  | 10.66 | 8.5   | 10.66  |

Clust.1

Clust.155

Clust.160

Cluster

Clust.167

Clust.174

# EBER-1 : grouping per country – Max MCC

Pop

|       |        |       |       |       |        |
|-------|--------|-------|-------|-------|--------|
| WG -  | 2.66   | 1.18  | 2.66  | 2.12  | 2.66   |
| USA - | 3.54   | 1.32  | 3.54  | 2.83  | 3.54   |
| UK -  | 1.61   | 0.16  | 1.61  | 1.28  | 1.61   |
| UG -  | 12.21  | 0.15  | 12.21 | 9.74  | 12.21  |
| TW -  | 14.29  | 0.18  | 14.29 | 11.4  | 14.29  |
| TU -  | 4.88   | 3.42  | 4.88  | 3.89  | 4.88   |
| SK -  | 43.38  | 2.18  | 43.38 | 34.6  | 43.38  |
| SA -  | 17.2   | 3.29  | 17.2  | 13.72 | 17.2   |
| PO -  | 8.47   | 2.21  | 8.47  | 6.76  | 8.47   |
| PN -  | 7.02   | 0.08  | 7.02  | 5.6   | 151.11 |
| NG -  | 28.83  | 1.08  | 28.83 | 23    | 28.83  |
| NAF - | 12.21  | 0.54  | 12.21 | 9.74  | 12.21  |
| KE -  | 2.87   | 4.19  | 2.87  | 2.29  | 2.87   |
| JP -  | 7.68   | 0.12  | 7.68  | 6.13  | 7.68   |
| IT -  | 2.87   | 0.86  | 2.87  | 2.29  | 2.87   |
| IN -  | 2.87   | 0.03  | 25.76 | 40.25 | 2.87   |
| HK -  | 7.02   | 11.46 | 7.02  | 5.6   | 7.02   |
| GH -  | 12.21  | 5.55  | 12.21 | 9.74  | 12.21  |
| GE -  | 43.38  | 2.18  | 43.38 | 34.6  | 43.38  |
| FR -  | 43.38  | 0.54  | 43.38 | 34.6  | 43.38  |
| CO -  | 8.47   | 11.44 | 8.47  | 6.76  | 8.47   |
| CH -  | 3.24   | 31.55 | 3.24  | 2.58  | 3.24   |
| BR -  | 12.21  | 5.55  | 12.21 | 22.73 | 12.21  |
| BO -  | 195.43 | 2.21  | 8.47  | 6.76  | 8.47   |
| AU -  | 3.9    | 0.71  | 8.63  | 3.11  | 3.9    |
| AR -  | 9.44   | 3.33  | 9.44  | 7.53  | 9.44   |
| AF -  | 10.66  | 0.18  | 10.66 | 8.5   | 10.66  |

Clust.1

Clust.155

Clust.160

Cluster

Clust.167

Clust.174

EBER-1 : grouping per continent – max CGS

Pop

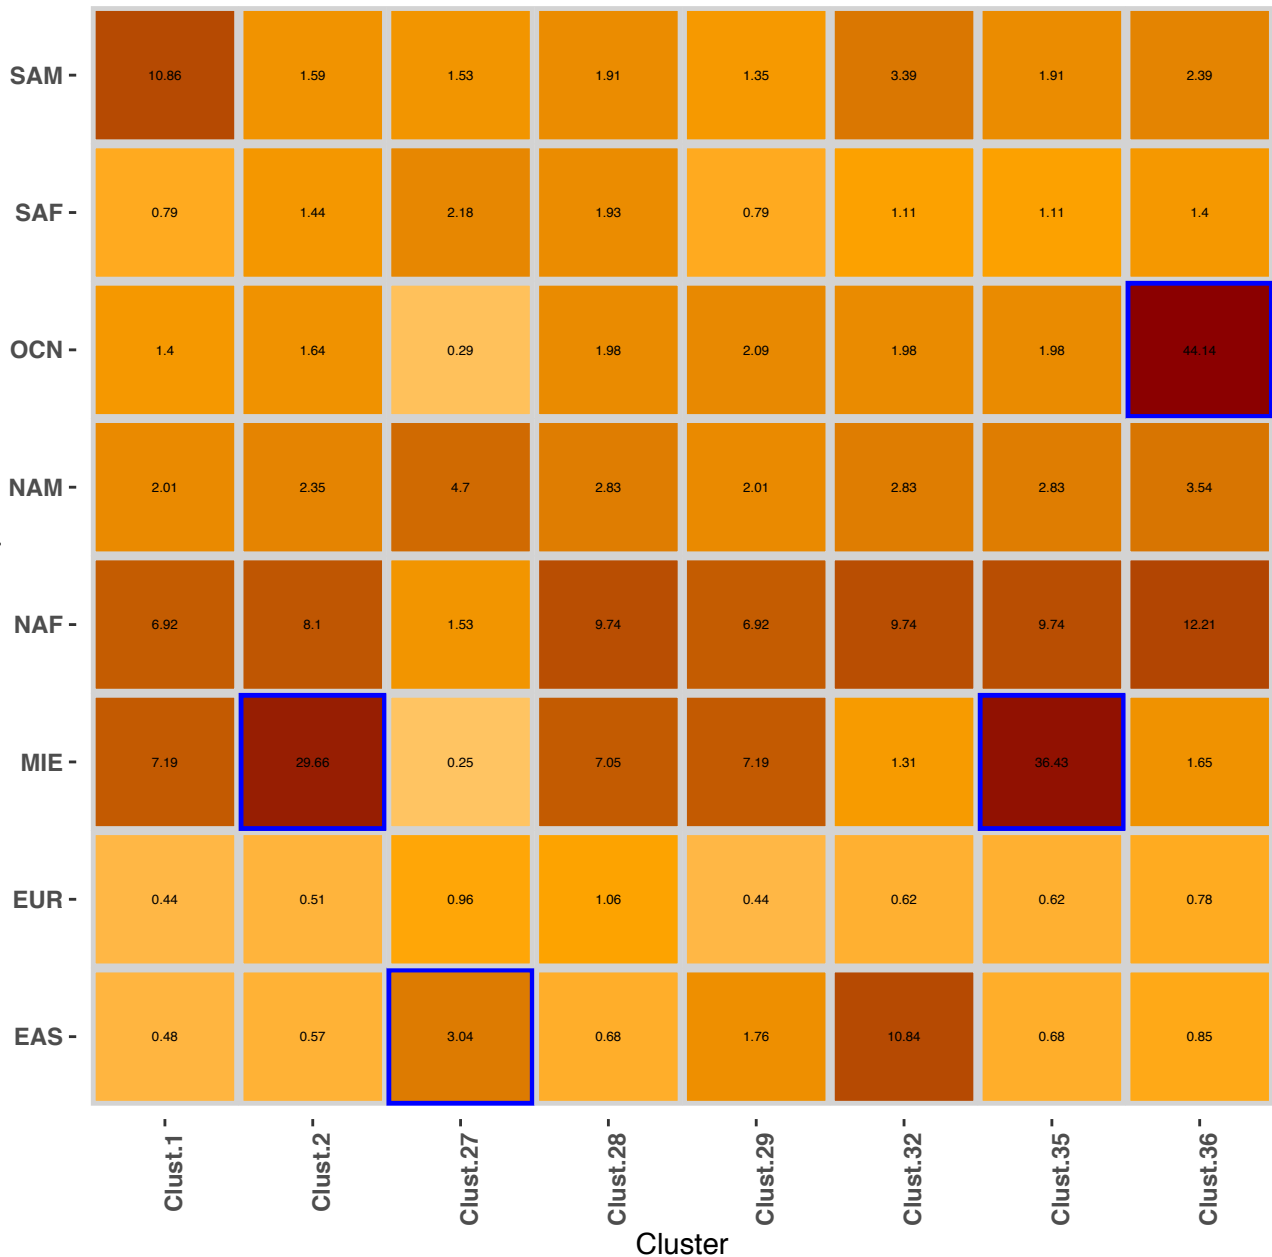



EBER-1 : grouping per continent – Max MCC

Pop

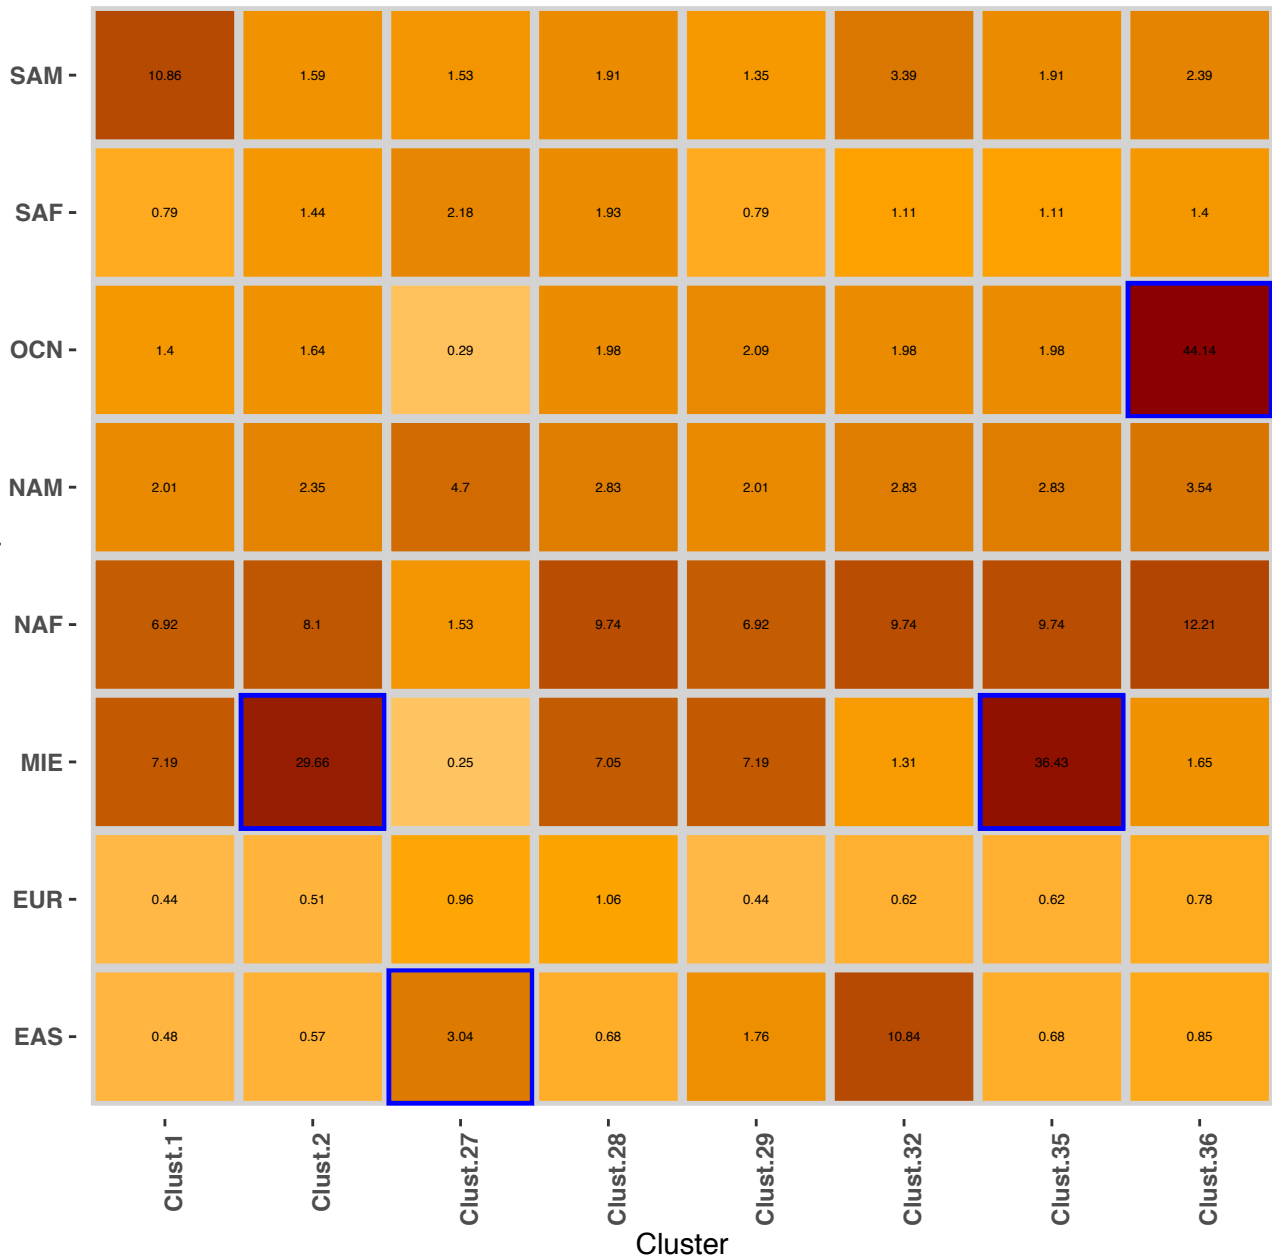

## EBER-2 : grouping per country – max CGS

[illegible]

# EBER-2 : grouping per country – Max MCC

| Pop   |  | Cluster  |          |          |          |          |          |          |          |          |          |          |           |
|-------|--|----------|----------|----------|----------|----------|----------|----------|----------|----------|----------|----------|-----------|
|       |  | Clust.50 | Clust.54 | Clust.65 | Clust.69 | Clust.71 | Clust.73 | Clust.91 | Clust.92 | Clust.95 | Clust.97 | Clust.99 | Clust.103 |
| WG -  |  | 2.26     | 47.85    | 5.71     | 5.71     | 5.71     | 23.78    | 0.07     | 2.21     | 5.71     | 2.67     | 3.8      | 0.44      |
| USA - |  | 2.01     | 3.55     | 3.55     | 3.55     | 3.55     | 3.55     | 3.07     | 1.84     | 3.55     | 3.55     | 2.83     | 0.51      |
| UK -  |  | 0.89     | 1.57     | 1.57     | 1.57     | 1.57     | 1.57     | 2.6      | 1.79     | 1.57     | 1.57     | 1.25     | 0.25      |
| UG -  |  | 6.94     | 12.25    | 12.25    | 12.25    | 12.25    | 12.25    | 2.18     | 3.63     | 12.25    | 12.25    | 9.77     | 1.76      |
| TW -  |  | 8.12     | 14.33    | 14.33    | 14.33    | 14.33    | 14.33    | 0.17     | 2.73     | 14.33    | 14.33    | 11.43    | 3.35      |
| TU -  |  | 4.11     | 4.61     | 10.38    | 10.38    | 44.4     | 4.61     | 0.13     | 1.1      | 4.61     | 4.61     | 3.68     | 0.81      |
| SK -  |  | 24.64    | 43.5     | 43.5     | 43.5     | 43.5     | 43.5     | 0.54     | 8.3      | 43.5     | 43.5     | 34.7     | 26.16     |
| SA -  |  | 9.77     | 17.25    | 17.25    | 17.25    | 17.25    | 17.25    | 0.36     | 3.29     | 17.25    | 57.5     | 13.76    | 2.48      |
| PO -  |  | 4.81     | 8.5      | 21.25    | 8.5      | 8.5      | 21.25    | 0.1      | 1.62     | 97.43    | 97.43    | 14.12    | 1.22      |
| PN -  |  | 4.81     | 8.5      | 8.5      | 8.5      | 8.5      | 8.5      | 0.13     | 2.25     | 8.5      | 8.5      | 6.78     | 1.22      |
| NG -  |  | 16.38    | 28.92    | 28.92    | 28.92    | 28.92    | 28.92    | 3.27     | 5.52     | 28.92    | 28.92    | 23.07    | 4.17      |
| NAF - |  | 6.94     | 12.25    | 12.25    | 12.25    | 12.25    | 12.25    | 0.21     | 20.56    | 12.25    | 12.25    | 9.77     | 7         |
| KE -  |  | 1.63     | 2.88     | 2.88     | 2.88     | 2.88     | 2.88     | 5.3      | 0.65     | 2.88     | 2.88     | 12.88    | 0.41      |
| JP -  |  | 3.67     | 6.48     | 6.48     | 6.48     | 6.48     | 6.48     | 0.09     | 1.23     | 6.48     | 6.48     | 5.17     | 2.75      |
| IT -  |  | 1.63     | 2.88     | 2.88     | 2.88     | 2.88     | 2.88     | 1        | 0.55     | 2.88     | 2.88     | 2.29     | 3.45      |
| IN -  |  | 1.63     | 2.88     | 2.88     | 2.88     | 2.88     | 2.88     | 1.63     | 0.55     | 2.88     | 2.88     | 2.29     | 0.41      |
| HK -  |  | 3.99     | 7.04     | 7.04     | 7.04     | 7.04     | 7.04     | 0.08     | 1.34     | 7.04     | 7.04     | 5.62     | 1.01      |
| GH -  |  | 6.94     | 12.25    | 12.25    | 12.25    | 12.25    | 12.25    | 5.52     | 2.34     | 12.25    | 12.25    | 9.77     | 1.76      |
| GE -  |  | 24.64    | 43.5     | 43.5     | 43.5     | 43.5     | 43.5     | 2.17     | 8.3      | 43.5     | 43.5     | 34.7     | 6.27      |
| FR -  |  | 24.64    | 43.5     | 43.5     | 43.5     | 43.5     | 43.5     | 2.17     | 8.3      | 43.5     | 43.5     | 34.7     | 6.27      |
| CO -  |  | 4.81     | 8.5      | 8.5      | 8.5      | 8.5      | 8.5      | 11.37    | 1.62     | 8.5      | 8.5      | 6.78     | 1.22      |
| CH -  |  | 1.92     | 3.4      | 3.4      | 3.4      | 3.4      | 3.4      | 0.28     | 0.65     | 3.4      | 3.4      | 2.71     | 9.76      |
| BR -  |  | 13.6     | 12.25    | 12.25    | 12.25    | 12.25    | 12.25    | 2.18     | 2.34     | 12.25    | 12.25    | 9.77     | 1.76      |
| BO -  |  | 4.81     | 8.5      | 8.5      | 8.5      | 8.5      | 8.5      | 8.99     | 1.62     | 8.5      | 8.5      | 6.78     | 1.22      |
| AU -  |  | 2.22     | 3.92     | 3.92     | 8.66     | 3.92     | 3.92     | 4.65     | 2.05     | 3.92     | 3.92     | 3.12     | 0.56      |
| AR -  |  | 68       | 9.47     | 9.47     | 9.47     | 9.47     | 9.47     | 1.08     | 1.81     | 9.47     | 9.47     | 7.56     | 1.9       |
| AF -  |  | 6.05     | 10.69    | 10.69    | 10.69    | 10.69    | 10.69    | 0.8      | 3.02     | 10.69    | 10.69    | 8.53     | 5.58      |

EBER-2 : grouping per continent – max CGS

Pop

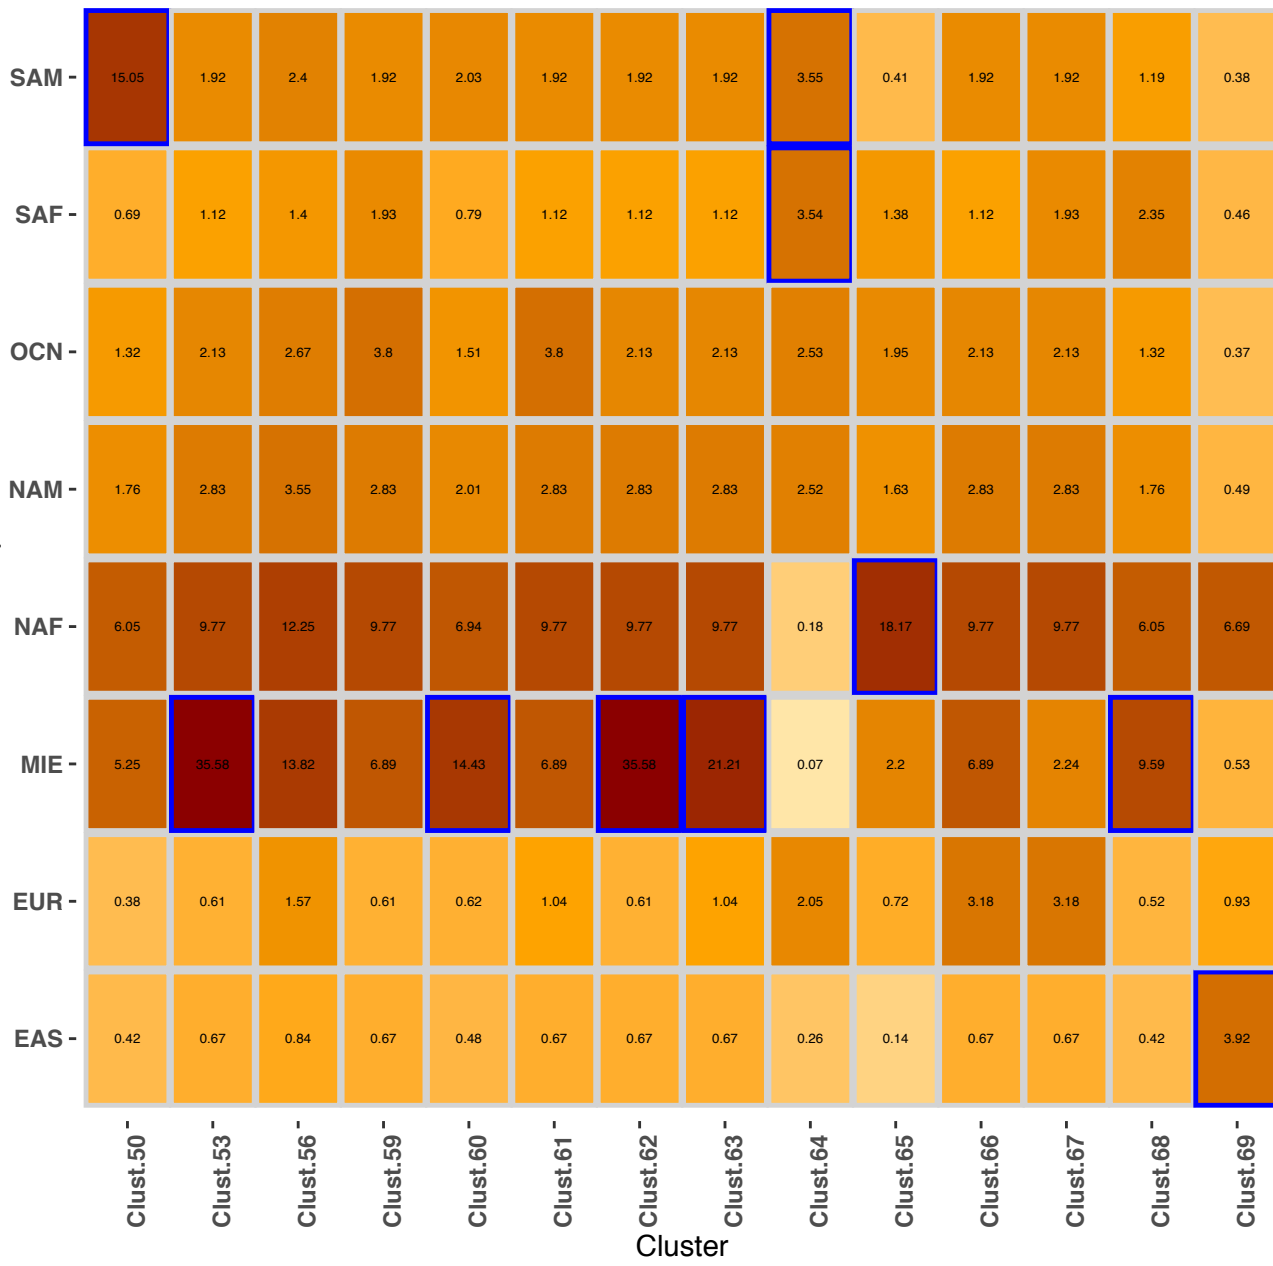

EBER-2 : grouping per continent – Max MCC

Pop

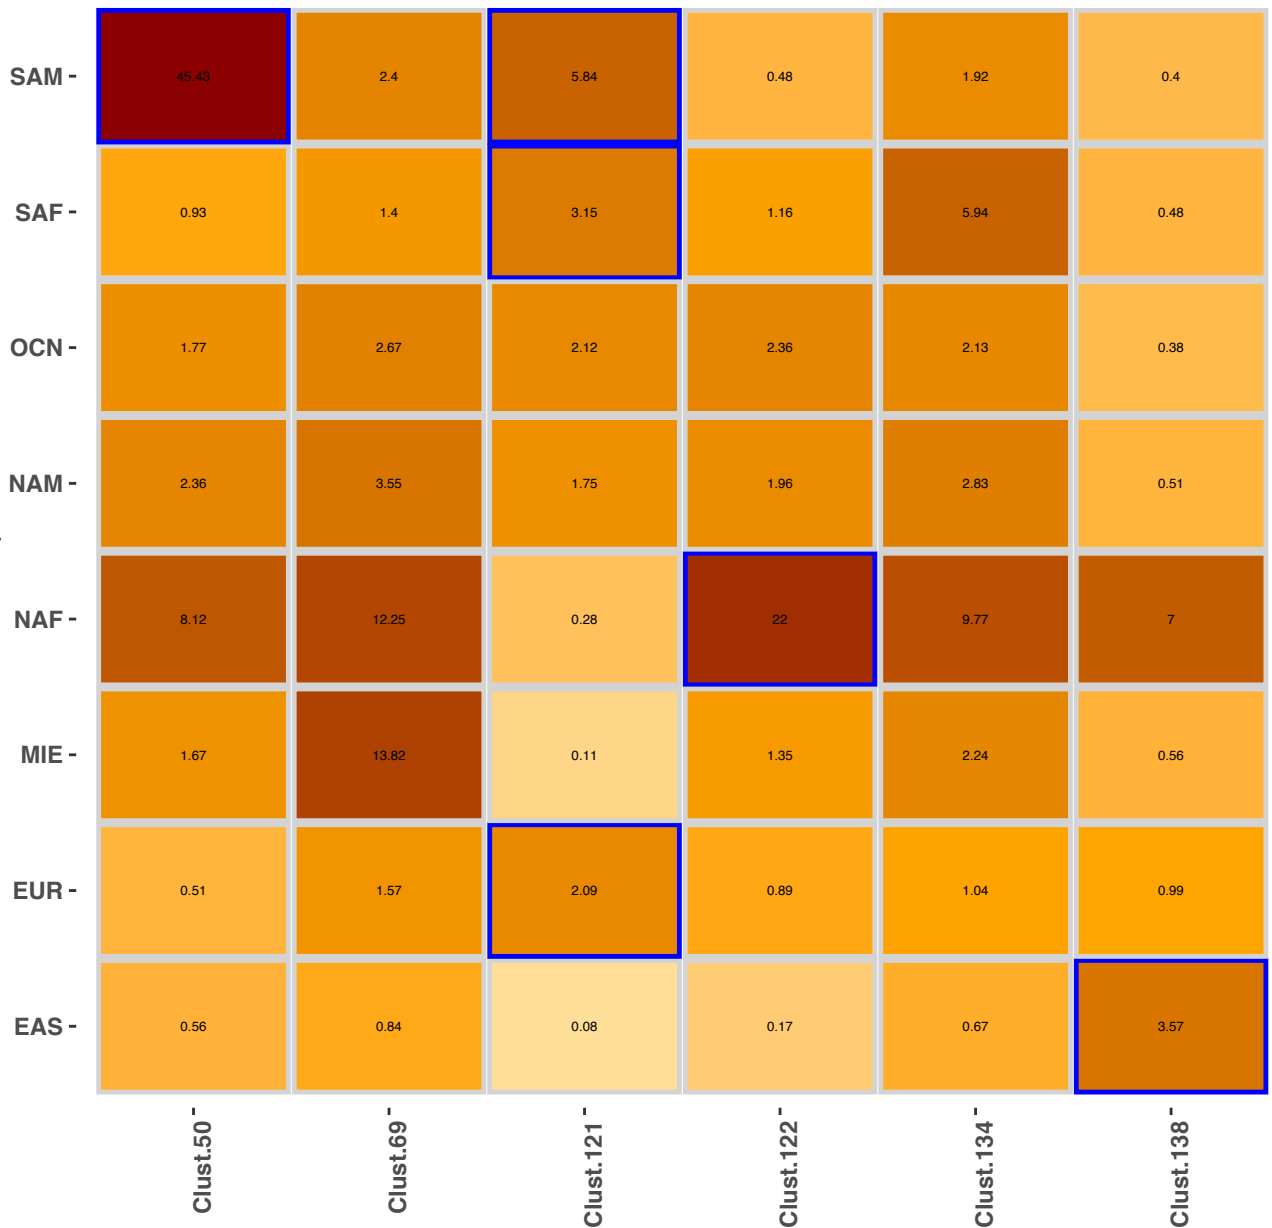

Cluster



# EBNA-1 : grouping per country – Max MCC

|     |       |          |          |          |          |          |
|-----|-------|----------|----------|----------|----------|----------|
| Pop | WG -  | 2.05     | 2.07     | 2.05     | 0.72     | 0.14     |
|     | USA - | 3.14     | 1.5      | 3.14     | 3.58     | 0.87     |
|     | UK -  | 1.79     | 1.86     | 1.79     | 1.91     | 0.13     |
|     | UG -  | 9.93     | 0.3      | 9.93     | 3.52     | 27.56    |
|     | TW -  | 11.62    | 0.35     | 11.62    | 4.12     | 0.8      |
|     | TU -  | 3.5      | 2.31     | 3.5      | 1.69     | 0.24     |
|     | SA -  | 14       | 0.72     | 14       | 4.96     | 5.13     |
|     | PO -  | 6.23     | 3.43     | 6.23     | 2.21     | 0.42     |
|     | PN -  | 6.23     | 0.19     | 6.23     | 16.47    | 0.42     |
|     | NG -  | 35.38    | 1.08     | 35.38    | 12.55    | 9.96     |
|     | NAF - | 9.93     | 1.09     | 139.5    | 3.52     | 2.54     |
|     | KE -  | 17.56    | 0.53     | 17.56    | 6.23     | 10.3     |
|     | JP -  | 6.23     | 0.19     | 6.23     | 2.21     | 0.42     |
|     | IT -  | 2.29     | 79.22    | 2.29     | 0.81     | 0.15     |
|     | IN -  | 2.29     | 0.25     | 2.29     | 1.07     | 0.17     |
|     | HK -  | 11.62    | 0.35     | 11.62    | 4.12     | 0.8      |
|     | GH -  | 9.93     | 0.3      | 9.93     | 3.52     | 27.56    |
|     | FR -  | 35.38    | 4.38     | 35.38    | 12.55    | 2.43     |
|     | CO -  | 5.69     | 0.21     | 5.69     | 2.02     | 62.37    |
|     | CH -  | 3.14     | 0.1      | 3.14     | 1.5      | 0.21     |
|     | BR -  | 9.93     | 0.3      | 9.93     | 3.52     | 10.73    |
|     | BO -  | 122.67   | 0.17     | 5.69     | 2.02     | 1.92     |
|     | AR -  | 6.88     | 0.61     | 6.88     | 2.44     | 6.8      |
|     | AF -  | 9.93     | 0.43     | 27.8     | 3.52     | 10.73    |
|     |       | Clust.75 | Clust.76 | Clust.79 | Clust.81 | Clust.83 |
|     |       | Cluster  |          |          |          |          |

EBNA-1 : grouping per continent – max CGS

Pop

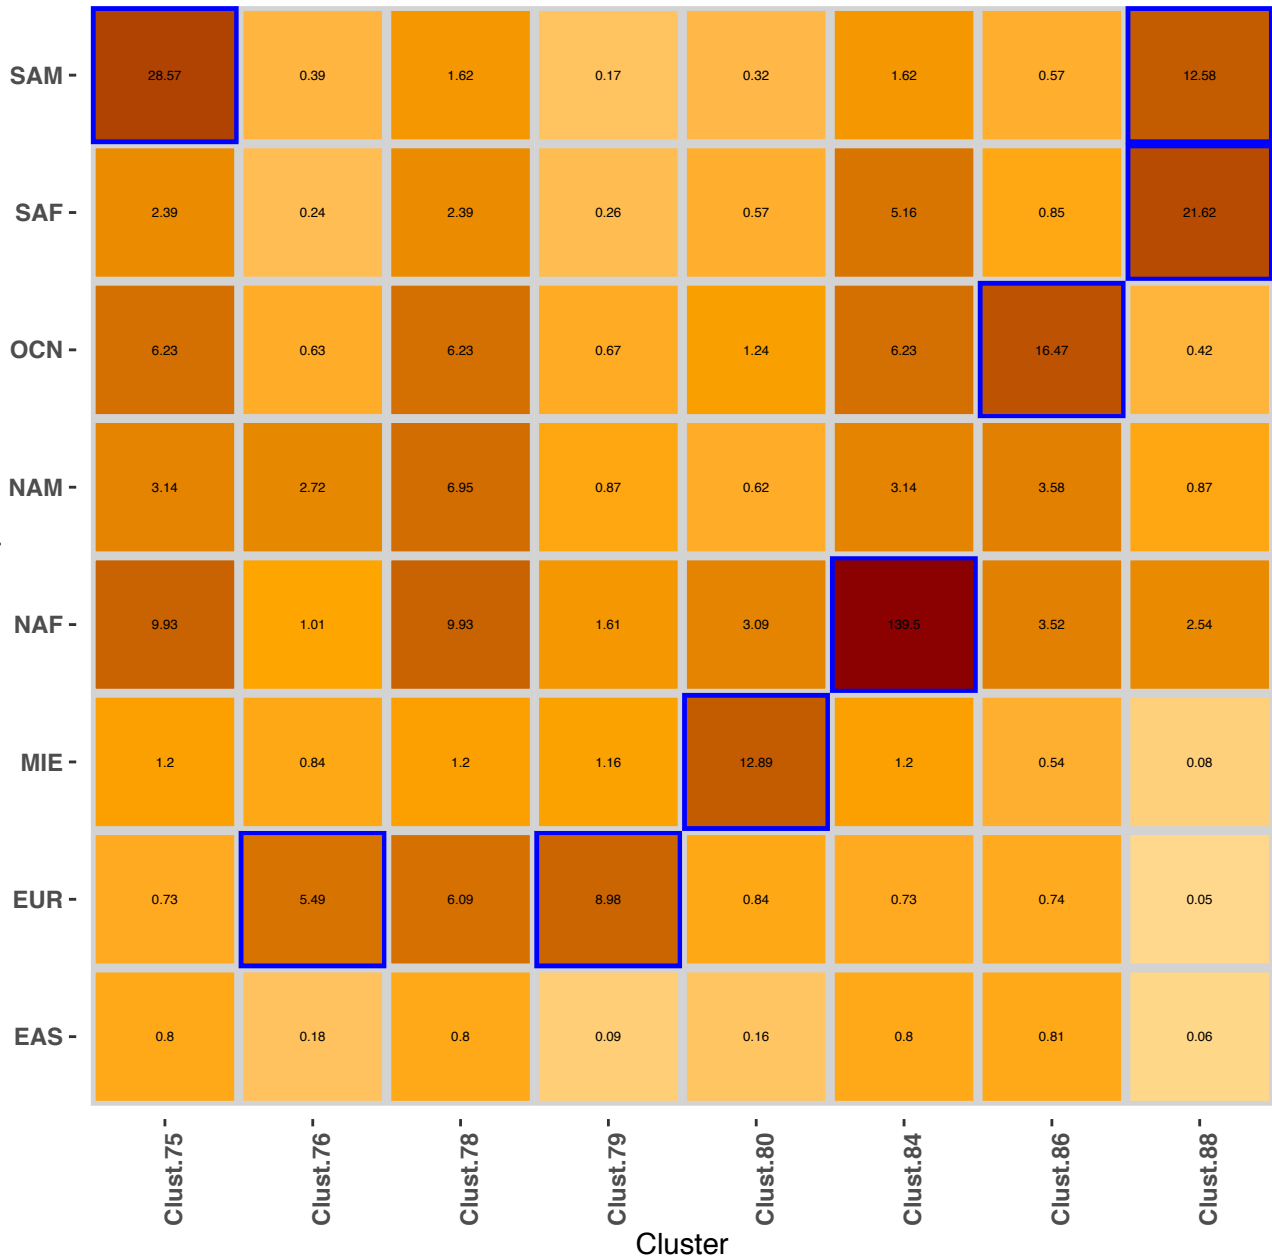



EBNA-1 : grouping per continent – Max MCC

Pop

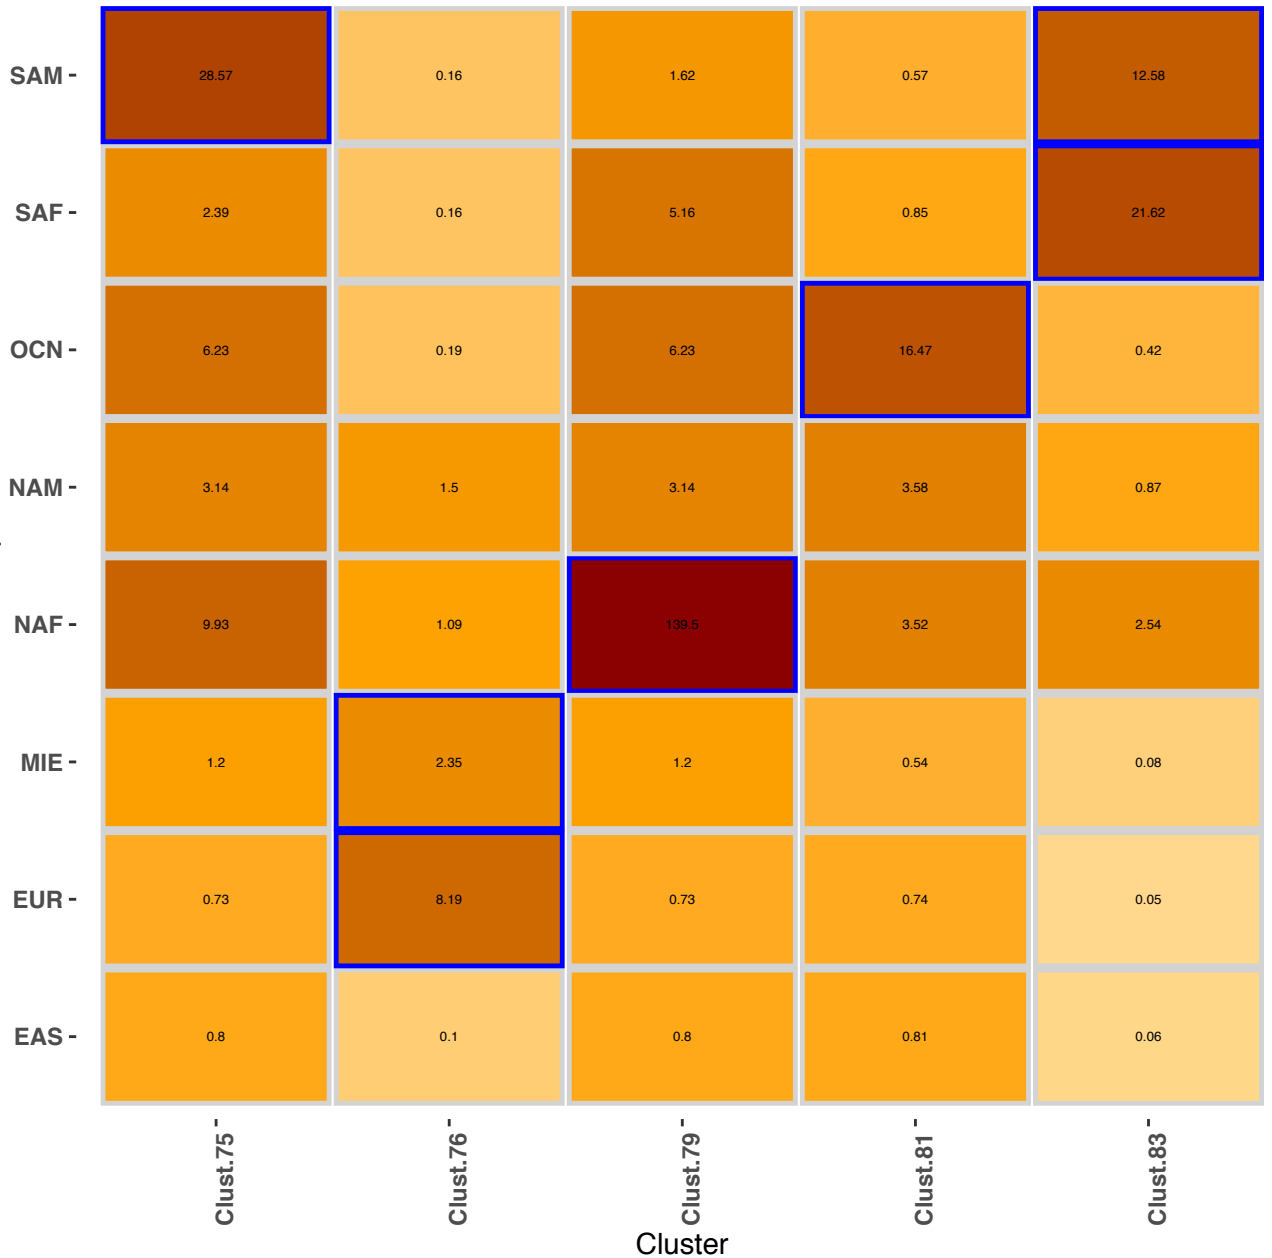

# EBNA-2\_type1 : grouping per country – max CGS

| Pop   | Cluster   |           |           |           |           |           |
|-------|-----------|-----------|-----------|-----------|-----------|-----------|
|       | Clust.122 | Clust.125 | Clust.126 | Clust.135 | Clust.136 | Clust.140 |
| WG -  | 4.82      | 0.76      | 2.56      | 3.84      | 2.54      | 0.31      |
| USA - | 0.49      | 0.58      | 1.66      | 6.4       | 1.92      | 0.24      |
| UK -  | 0.3       | 0.3       | 2.07      | 1.53      | 10.24     | 0.46      |
| UG -  | 2.91      | 3.41      | 0.97      | 17.12     | 11.33     | 1.4       |
| TW -  | 2.91      | 3.41      | 0.97      | 17.12     | 11.33     | 1.4       |
| TU -  | 4.13      | 0.94      | 2.63      | 4.71      | 5.46      | 0.38      |
| SK -  | 5.86      | 6.87      | 1.96      | 34.5      | 22.83     | 2.83      |
| SA -  | 3.89      | 4.56      | 4.04      | 22.92     | 15.17     | 1.88      |
| PO -  | 1.56      | 1.33      | 5.37      | 6.7       | 4.43      | 0.55      |
| PN -  | 1.92      | 2.25      | 0.64      | 11.33     | 7.5       | 38.76     |
| NAF - | 8.95      | 2.25      | 0.64      | 11.33     | 7.5       | 0.93      |
| KE -  | 0.55      | 0.64      | 6.57      | 3.23      | 2.13      | 0.26      |
| JP -  | 1.27      | 1.49      | 0.42      | 7.47      | 4.94      | 0.61      |
| IT -  | 7.74      | 480.7     | 0.12      | 2.23      | 1.48      | 0.18      |
| IN -  | 0.47      | 0.55      | 0.15      | 2.77      | 1.83      | 14.91     |
| HK -  | 0.94      | 1.1       | 0.31      | 5.54      | 3.67      | 18.99     |
| GH -  | 1.92      | 2.25      | 0.64      | 11.33     | 7.5       | 0.93      |
| GE -  | 5.86      | 6.87      | 1.96      | 34.5      | 22.83     | 2.83      |
| FR -  | 5.86      | 6.87      | 8         | 34.5      | 22.83     | 2.83      |
| CO -  | 2.32      | 2.72      | 1.33      | 13.65     | 9.03      | 1.12      |
| CH -  | 0.47      | 0.55      | 0.15      | 2.77      | 1.83      | 0.91      |
| BR -  | 1.64      | 1.92      | 0.79      | 9.68      | 6.4       | 1.17      |
| BO -  | 1.43      | 1.68      | 0.48      | 8.44      | 5.58      | 40.63     |
| AU -  | 0.55      | 0.64      | 2.51      | 30.47     | 3.56      | 0.26      |
| AR -  | 1.64      | 1.92      | 0.55      | 9.68      | 6.4       | 1.17      |
| AF -  | 8.95      | 2.25      | 0.64      | 11.33     | 7.5       | 0.93      |

# EBNA-2\_type1 : grouping per country – Max MCC

| Pop   | Cluster   |           |           |           |
|-------|-----------|-----------|-----------|-----------|
|       | Clust.122 | Clust.125 | Clust.126 | Clust.130 |
| WG -  | 4.82      | 0.76      | 1.79      | 0.31      |
| USA - | 0.49      | 0.58      | 1.48      | 0.24      |
| UK -  | 0.3       | 0.3       | 3.55      | 0.46      |
| UG -  | 2.91      | 3.41      | 0.7       | 1.4       |
| TW -  | 2.91      | 3.41      | 0.7       | 1.4       |
| TU -  | 4.13      | 0.94      | 2.6       | 0.38      |
| SK -  | 5.86      | 6.87      | 1.42      | 2.83      |
| SA -  | 3.89      | 4.56      | 2.9       | 1.88      |
| PO -  | 1.56      | 1.33      | 3.79      | 0.55      |
| PN -  | 1.92      | 2.25      | 0.46      | 38.76     |
| NAF - | 8.95      | 2.25      | 0.46      | 0.93      |
| KE -  | 0.55      | 0.64      | 5.71      | 0.26      |
| JP -  | 1.27      | 1.49      | 0.3       | 0.61      |
| IT -  | 7.74      | 480.7     | 0.09      | 0.18      |
| IN -  | 0.47      | 0.55      | 0.11      | 14.91     |
| HK -  | 0.94      | 1.1       | 0.22      | 18.99     |
| GH -  | 1.92      | 2.25      | 0.46      | 0.93      |
| GE -  | 5.86      | 6.87      | 5.78      | 2.83      |
| FR -  | 5.86      | 6.87      | 5.78      | 2.83      |
| CO -  | 2.32      | 2.72      | 0.96      | 1.12      |
| CH -  | 0.47      | 0.55      | 0.11      | 0.91      |
| BR -  | 1.64      | 1.92      | 0.57      | 1.17      |
| BO -  | 1.43      | 1.68      | 0.34      | 40.63     |
| AU -  | 0.55      | 0.64      | 5.71      | 0.26      |
| AR -  | 1.64      | 1.92      | 0.4       | 1.17      |
| AF -  | 8.95      | 2.25      | 0.46      | 0.93      |

EBNA-2\_type1 : grouping per continent – max CGS

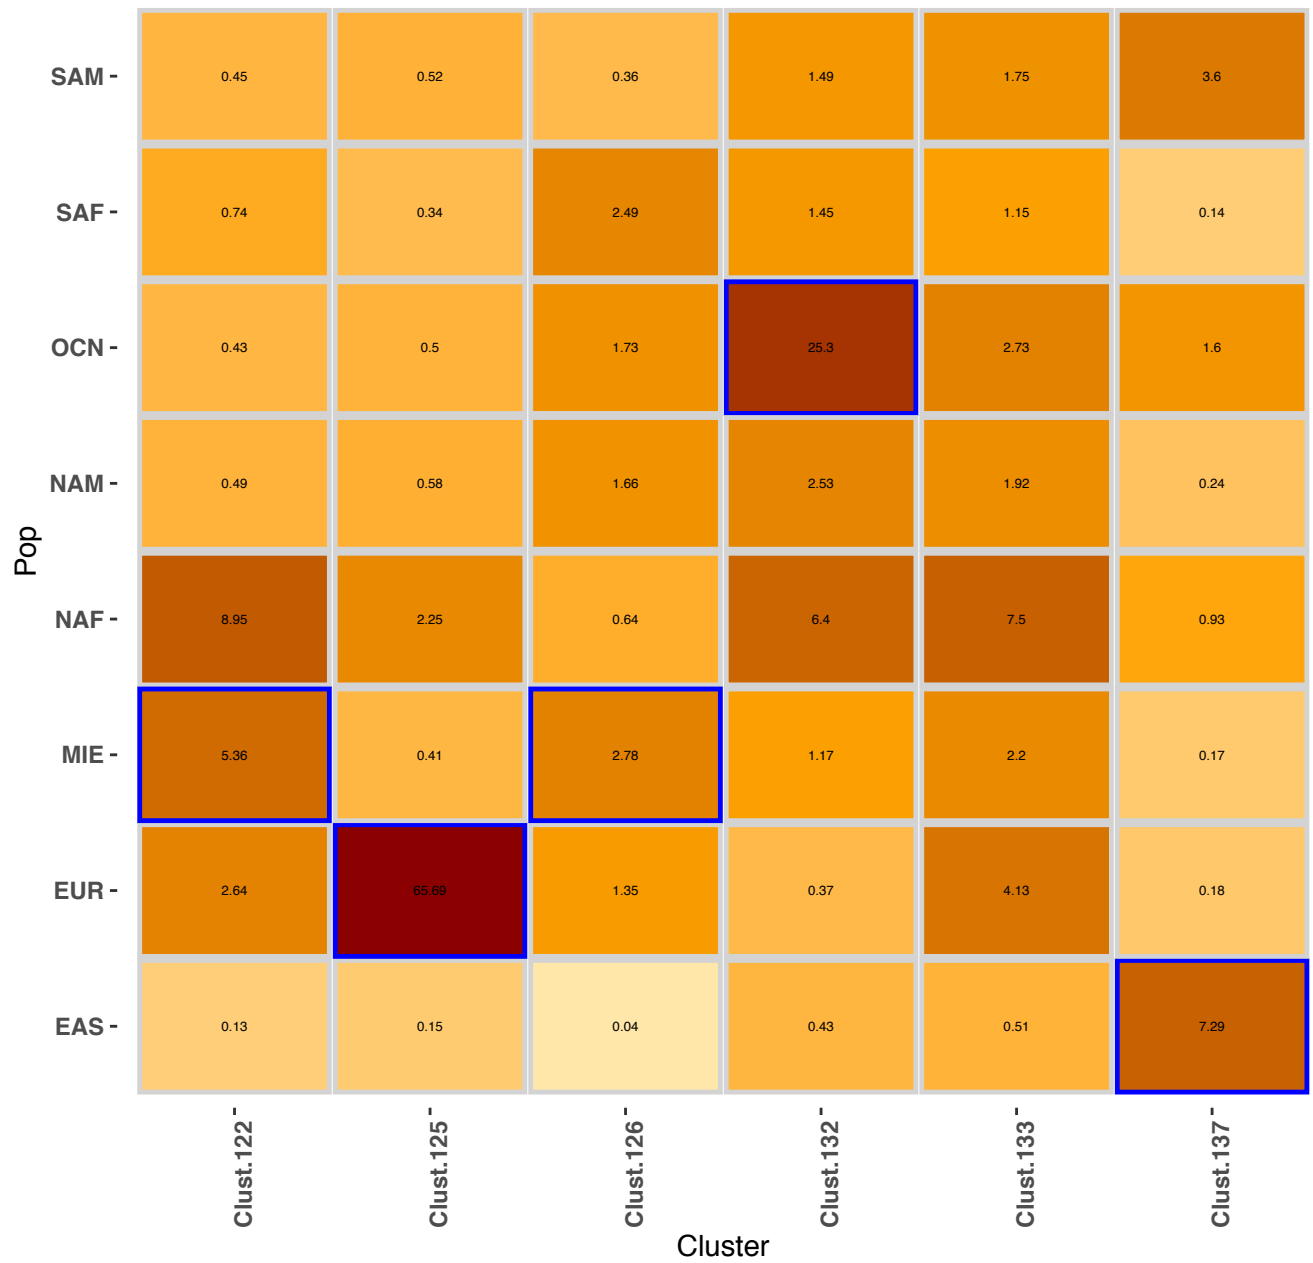

EBNA-2\_type1 : grouping per continent – Max MCC

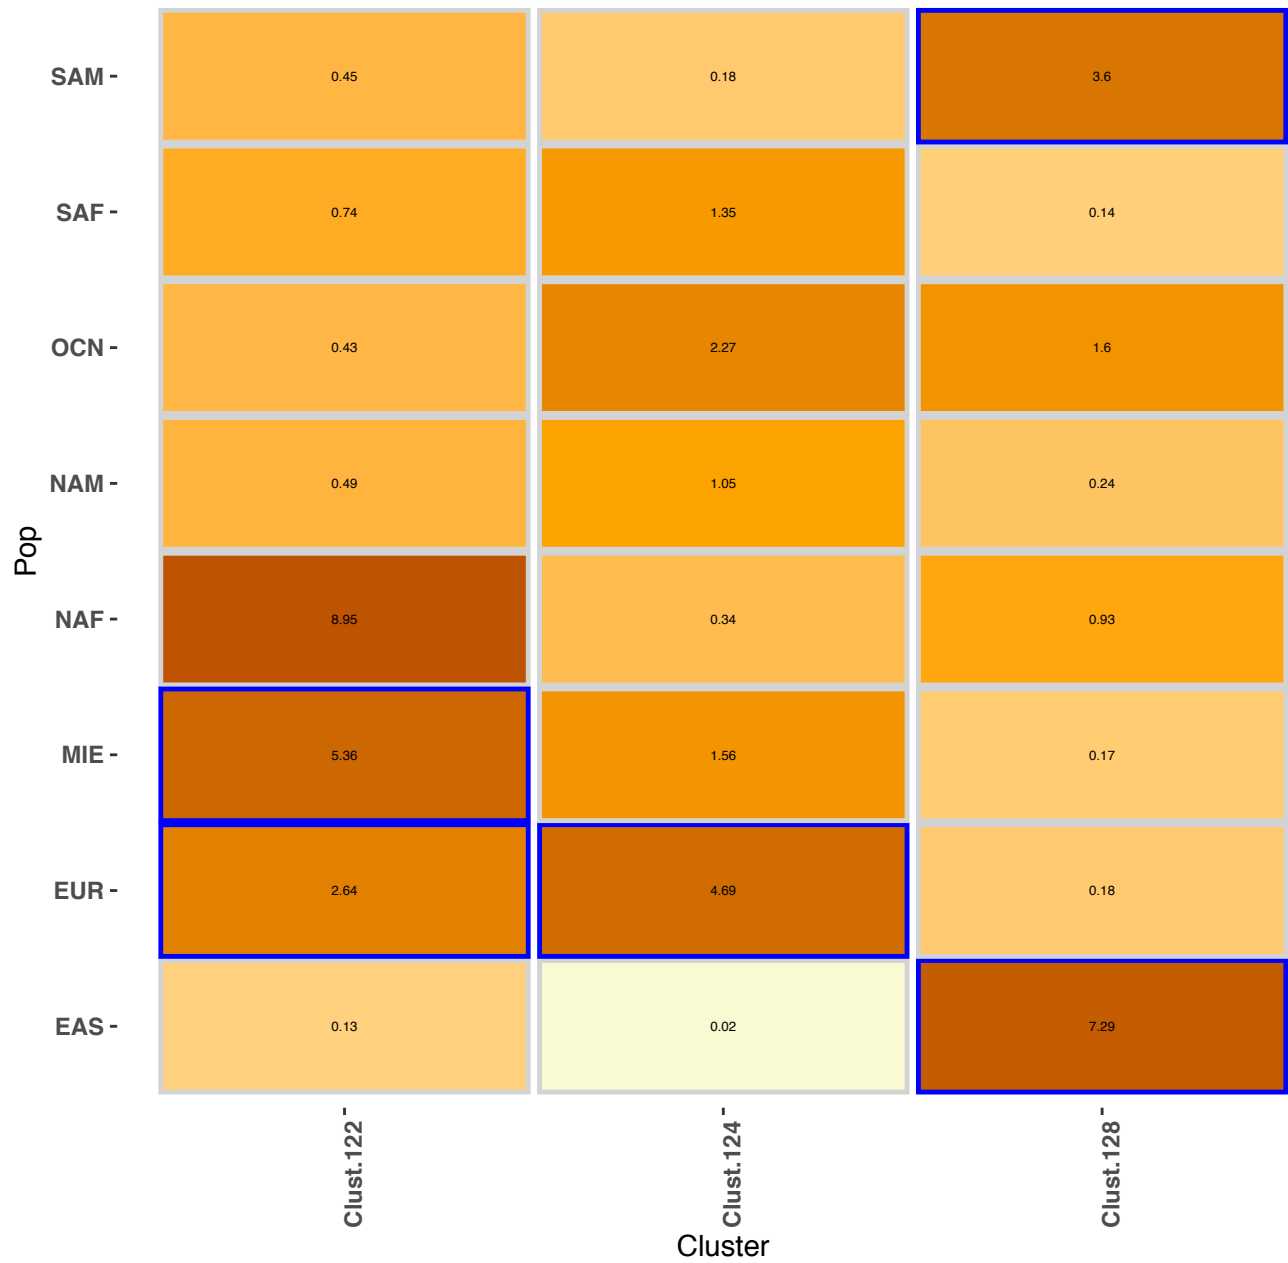

# EBNA-3A\_type1 : grouping per country – max CGS

Pop

|       |         |         |          |          |          |          |          |          |          |          |          |          |          |          |          |          |          |          |
|-------|---------|---------|----------|----------|----------|----------|----------|----------|----------|----------|----------|----------|----------|----------|----------|----------|----------|----------|
| WG -  | 0.5     | 2.23    | 3.94     | 3.14     | 1.94     | 3.94     | 2.23     | 8.88     | 30.43    | 0.61     | 0.29     | 3.94     | 1.94     | 2.64     | 0.38     | 3.14     | 0.56     | 2.61     |
| USA - | 0.44    | 1.99    | 3.52     | 2.81     | 6.56     | 3.52     | 1.99     | 3.52     | 2.33     | 3.72     | 1.08     | 3.52     | 2.57     | 1.11     | 0.4      | 16.59    | 0.5      | 2.33     |
| UK -  | 0.18    | 0.75    | 1.32     | 1.05     | 4.3      | 1.32     | 11.81    | 1.32     | 0.88     | 1.16     | 0.81     | 2.76     | 0.65     | 1.76     | 0.86     | 5.64     | 0.21     | 0.88     |
| UG -  | 1.56    | 6.98    | 12.33    | 9.83     | 6.08     | 12.33    | 6.98     | 12.33    | 8.17     | 1.92     | 9.14     | 12.33    | 39.07    | 0.94     | 1.18     | 9.83     | 1.76     | 8.17     |
| TW -  | 1.88    | 8.4     | 14.85    | 11.84    | 7.33     | 14.85    | 8.4      | 14.85    | 9.83     | 2.31     | 1.11     | 14.85    | 7.33     | 1.14     | 40.61    | 11.84    | 2.12     | 9.83     |
| TU -  | 0.6     | 2.7     | 11.04    | 7.33     | 2.36     | 4.78     | 2.7      | 4.78     | 5.48     | 0.93     | 0.36     | 4.78     | 2.36     | 3.56     | 0.46     | 3.81     | 0.68     | 3.17     |
| SK -  | 4.74    | 21.21   | 37.5     | 29.9     | 18.5     | 37.5     | 21.21    | 37.5     | 24.83    | 5.83     | 2.8      | 37.5     | 18.5     | 2.88     | 14.89    | 29.9     | 5.35     | 24.83    |
| SA -  | 2.35    | 10.54   | 18.62    | 14.85    | 9.19     | 18.62    | 10.54    | 18.62    | 12.33    | 6.32     | 2.91     | 18.62    | 9.19     | 1.43     | 1.79     | 14.85    | 2.65     | 12.33    |
| PO -  | 0.83    | 3.74    | 6.61     | 10.74    | 3.26     | 6.61     | 3.74     | 6.61     | 4.38     | 1.03     | 1.45     | 6.61     | 3.26     | 2.63     | 0.63     | 5.27     | 0.94     | 4.38     |
| PN -  | 100.36  | 5.2     | 9.19     | 7.33     | 4.53     | 9.19     | 5.2      | 9.19     | 6.08     | 1.43     | 0.68     | 9.19     | 4.53     | 0.7      | 0.88     | 7.33     | 1.31     | 6.08     |
| NAF - | 1.33    | 5.96    | 10.54    | 8.4      | 5.2      | 10.54    | 5.96     | 29.5     | 6.98     | 6.57     | 1.15     | 10.54    | 5.2      | 3.04     | 1.01     | 8.4      | 1.5      | 6.98     |
| KE -  | 0.5     | 1.89    | 3.35     | 2.67     | 1.65     | 3.35     | 1.89     | 3.35     | 2.21     | 0.52     | 14.57    | 31.33    | 1.65     | 0.25     | 0.37     | 2.67     | 0.47     | 2.21     |
| JP -  | 0.76    | 3.42    | 6.04     | 4.82     | 2.98     | 6.04     | 3.42     | 6.04     | 4        | 0.94     | 0.45     | 6.04     | 2.98     | 0.46     | 10.48    | 4.82     | 1.12     | 166.29   |
| IT -  | 0.31    | 88.14   | 5.27     | 10.96    | 1.21     | 5.27     | 2.08     | 5.27     | 2.62     | 0.44     | 0.43     | 2.45     | 1.21     | 3.44     | 0.23     | 1.95     | 0.35     | 1.62     |
| IN -  | 94.65   | 1.5     | 2.65     | 2.12     | 1.31     | 2.65     | 2.27     | 2.65     | 1.76     | 0.48     | 0.2      | 2.65     | 1.31     | 0.2      | 1.01     | 2.12     | 0.44     | 1.76     |
| HK -  | 0.76    | 3.42    | 6.04     | 4.82     | 2.98     | 6.04     | 3.42     | 6.04     | 4        | 0.94     | 0.45     | 6.04     | 2.98     | 0.46     | 1.69     | 4.82     | 77.62    | 4        |
| GH -  | 1.56    | 6.98    | 12.33    | 9.83     | 6.08     | 12.33    | 6.98     | 12.33    | 8.17     | 20.85    | 0.92     | 12.33    | 39.07    | 0.94     | 1.18     | 9.83     | 1.76     | 8.17     |
| GE -  | 4.74    | 21.21   | 200.67   | 29.9     | 18.5     | 37.5     | 21.21    | 37.5     | 24.83    | 5.83     | 2.8      | 37.5     | 18.5     | 2.88     | 3.61     | 29.9     | 5.35     | 24.83    |
| FR -  | 4.74    | 21.21   | 37.5     | 29.9     | 18.5     | 200.67   | 21.21    | 37.5     | 24.83    | 5.83     | 2.8      | 37.5     | 18.5     | 2.88     | 3.61     | 29.9     | 5.35     | 24.83    |
| CO -  | 1.88    | 8.4     | 14.85    | 11.84    | 7.33     | 14.85    | 8.4      | 14.85    | 9.83     | 13.24    | 5.95     | 14.85    | 7.33     | 1.14     | 1.43     | 11.84    | 2.12     | 9.83     |
| CH -  | 0.36    | 1.64    | 2.9      | 2.31     | 1.43     | 2.9      | 1.64     | 2.9      | 1.92     | 0.45     | 0.21     | 2.9      | 1.43     | 0.22     | 6.02     | 2.31     | 29.03    | 3.14     |
| BR -  | 1.33    | 5.96    | 10.54    | 8.4      | 5.2      | 10.54    | 5.96     | 10.54    | 6.98     | 1.64     | 6.07     | 10.54    | 9.7      | 0.81     | 1.5      | 8.4      | 1.5      | 6.98     |
| BO -  | 1.33    | 5.96    | 10.54    | 8.4      | 5.2      | 10.54    | 5.96     | 10.54    | 6.98     | 1.64     | 1.15     | 10.54    | 5.2      | 0.81     | 1.01     | 8.4      | 1.5      | 6.98     |
| AU -  | 0.44    | 1.99    | 3.52     | 2.81     | 6.56     | 7.83     | 1.99     | 3.52     | 2.33     | 2.48     | 1.58     | 3.52     | 1.74     | 2.24     | 0.87     | 2.81     | 0.5      | 2.33     |
| AR -  | 1.33    | 5.96    | 10.54    | 8.4      | 5.2      | 10.54    | 5.96     | 10.54    | 6.98     | 1.64     | 12.49    | 10.54    | 5.2      | 0.81     | 1.01     | 8.4      | 1.5      | 6.98     |
| AF -  | 1.56    | 6.98    | 12.33    | 9.83     | 6.08     | 12.33    | 6.98     | 12.33    | 8.17     | 3.14     | 0.92     | 12.33    | 12.17    | 4.06     | 1.88     | 9.83     | 1.76     | 8.17     |
|       | Clust.1 | Clust.9 | Clust.10 | Clust.17 | Clust.18 | Clust.19 | Clust.21 | Clust.22 | Clust.23 | Clust.24 | Clust.26 | Clust.27 | Clust.28 | Clust.29 | Clust.40 | Clust.42 | Clust.44 | Clust.45 |

Cluster

# EBNA-3A\_type1 : grouping per country – Max MCC

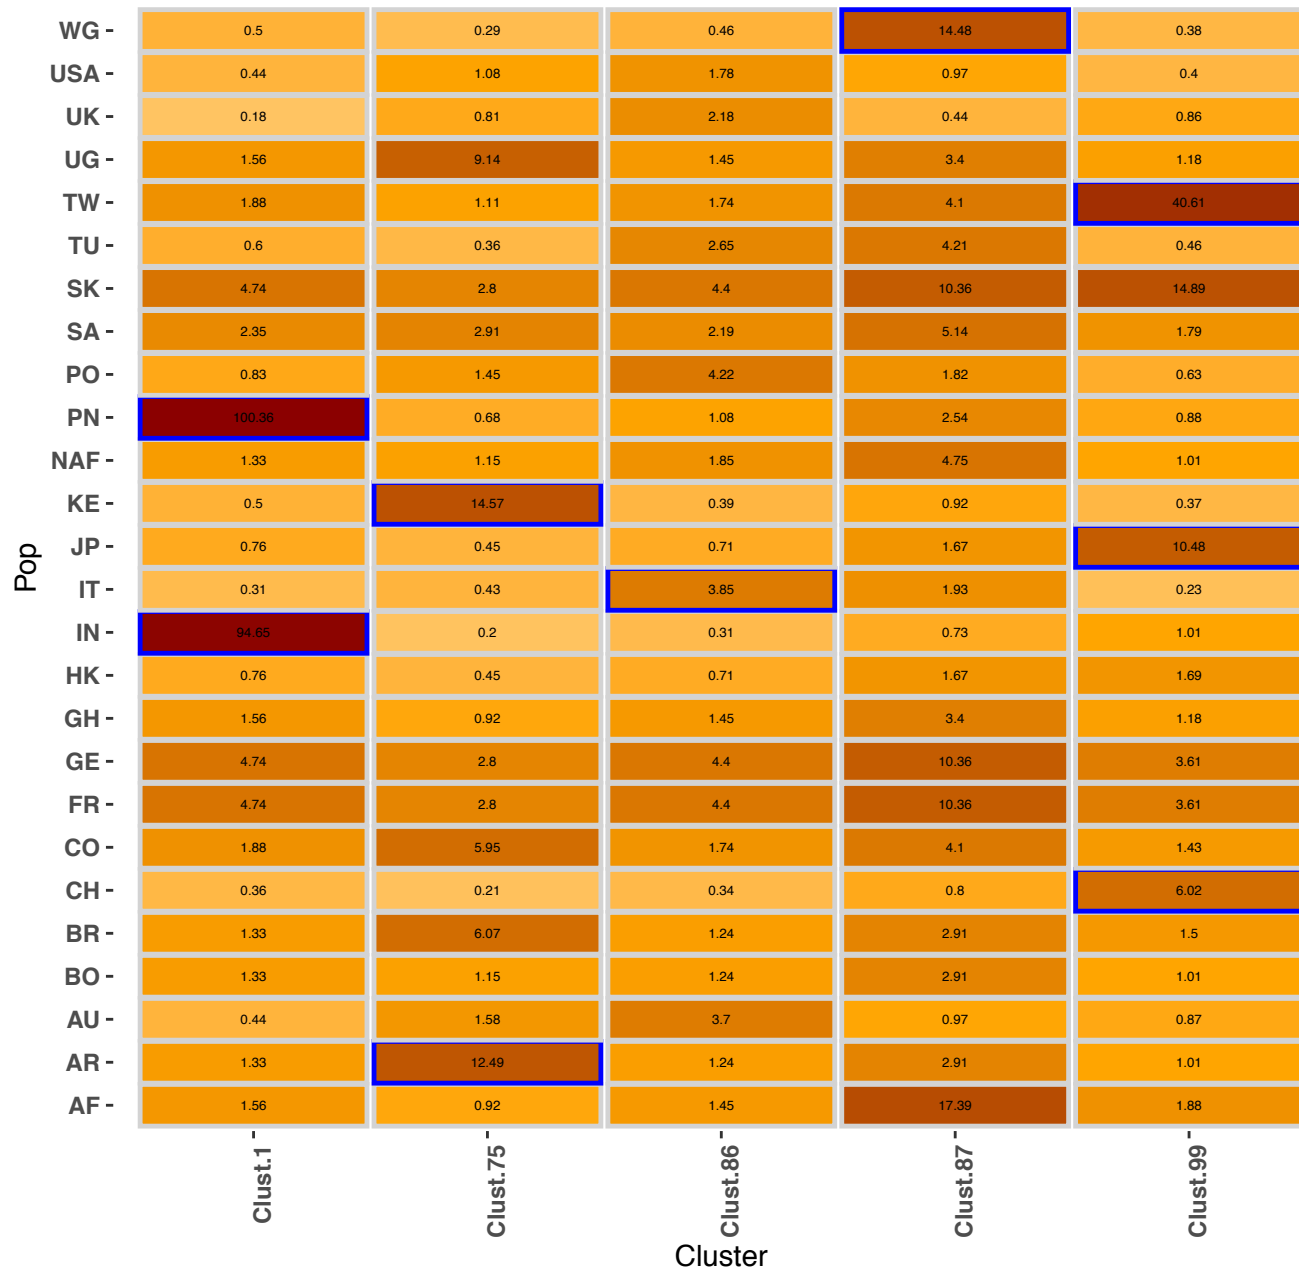

EBNA-3A\_type1 : grouping per continent – max CGS

Pop

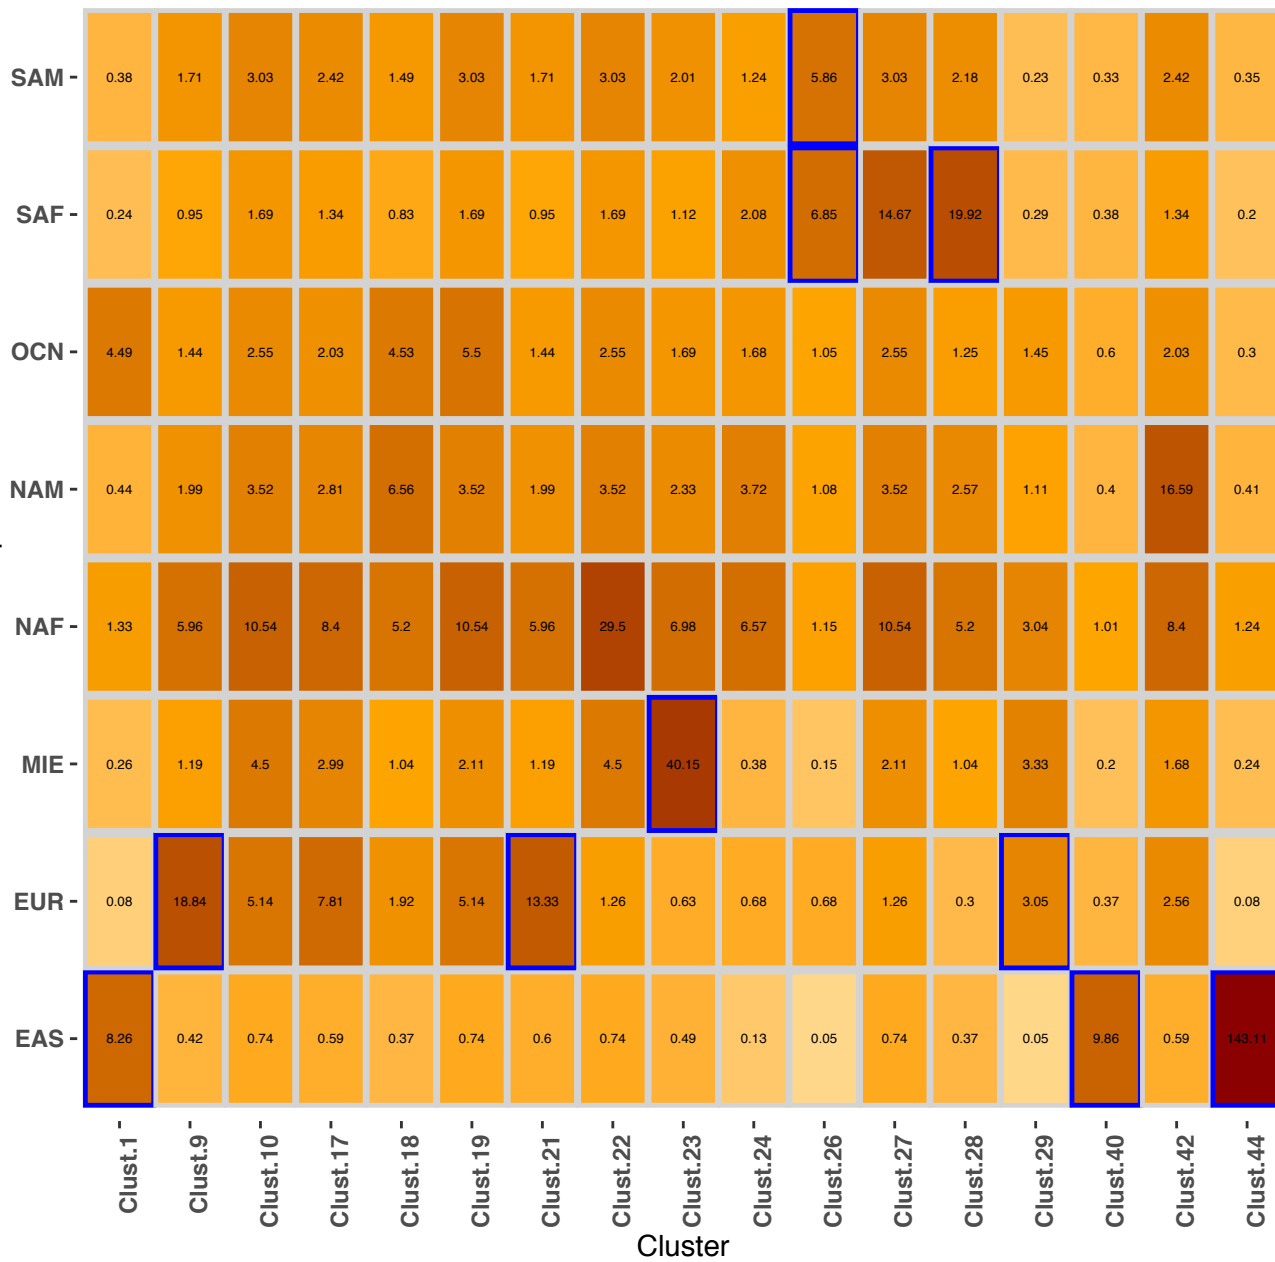



**EBNA-3A\_type1 : grouping per continent – Max MCC**

Pop

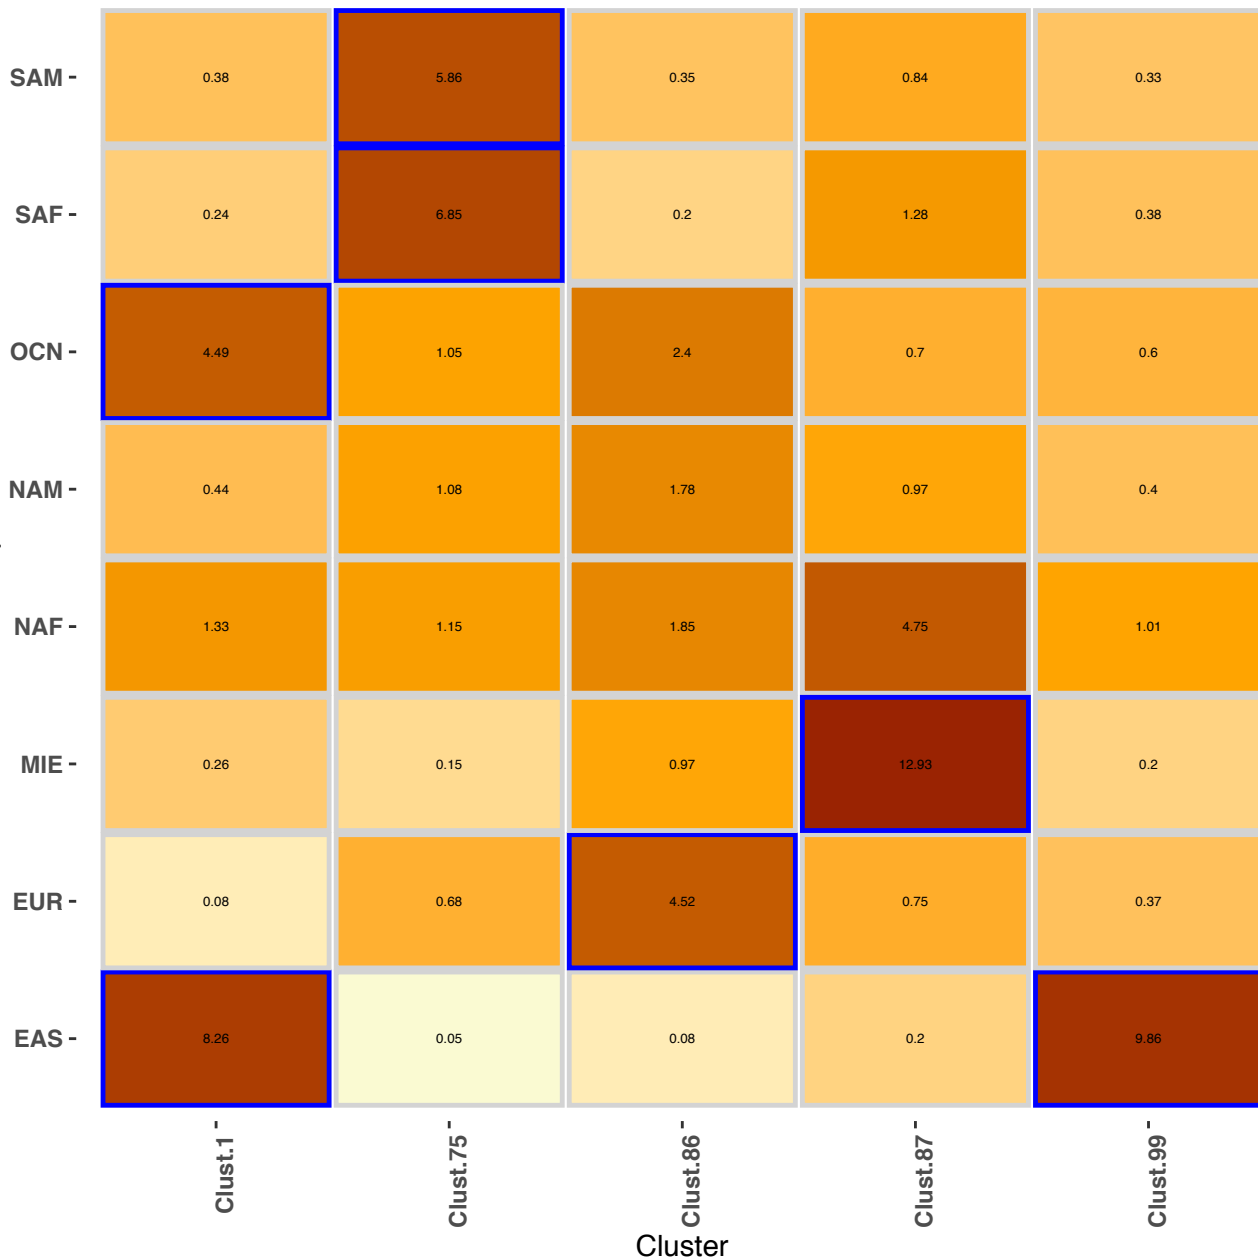

EBNA-3B\_type1 : grouping per country – max CGS

| Pop                                                                                                                                                                                                            |  | Cluster |         |         |         |          |          |          |          |          |          |          |          |          |          |          |          |
|----------------------------------------------------------------------------------------------------------------------------------------------------------------------------------------------------------------|--|---------|---------|---------|---------|----------|----------|----------|----------|----------|----------|----------|----------|----------|----------|----------|----------|
|                                                                                                                                                                                                                |  | Clust.1 | Clust.2 | Clust.3 | Clust.5 | Clust.10 | Clust.11 | Clust.36 | Clust.38 | Clust.57 | Clust.60 | Clust.66 | Clust.72 | Clust.73 | Clust.76 | Clust.77 | Clust.79 |
| WG -<br>USA -<br>UK -<br>UG -<br>TW -<br>TU -<br>SK -<br>SA -<br>PO -<br>PN -<br>NAF -<br>KE -<br>JP -<br>IT -<br>IN -<br>HK -<br>GH -<br>GE -<br>FR -<br>CO -<br>CH -<br>BR -<br>BO -<br>AU -<br>AR -<br>AF - |  | 0.67    | 0.31    | 0.65    | 3.75    | 72       | 3.75     | 35.75    | 2.48     | 1.64     | 1.47     | 1.33     | 0.42     | 13.41    | 0.41     | 3.75     | 1.85     |
|                                                                                                                                                                                                                |  | 4.5     | 0.34    | 0.28    | 7.89    | 3.55     | 3.55     | 3.55     | 11.1     | 5.49     | 4.69     | 1.26     | 1.73     | 0.98     | 0.39     | 3.55     | 1.75     |
|                                                                                                                                                                                                                |  | 4.08    | 0.24    | 1.08    | 1.3     | 1.3      | 1.3      | 3.68     | 0.76     | 2.79     | 0.46     | 2.47     | 2.47     | 0.43     | 0.16     | 1.3      | 0.89     |
|                                                                                                                                                                                                                |  | 2.23    | 4.46    | 0.86    | 12.42   | 12.42    | 12.42    | 12.42    | 8.22     | 5.43     | 4.87     | 8.08     | 1.41     | 3.43     | 1.36     | 12.42    | 6.12     |
|                                                                                                                                                                                                                |  | 2.89    | 6.72    | 5.54    | 14.95   | 14.95    | 14.95    | 14.95    | 9.9      | 6.53     | 5.86     | 5.31     | 1.69     | 4.13     | 1.64     | 14.95    | 7.38     |
|                                                                                                                                                                                                                |  | 0.86    | 0.4     | 0.33    | 4.82    | 4.82     | 4.82     | 11.12    | 3.19     | 2.1      | 1.89     | 1.71     | 2.56     | 4.24     | 0.53     | 4.82     | 2.38     |
|                                                                                                                                                                                                                |  | 6.79    | 12.93   | 2.62    | 37.75   | 37.75    | 37.75    | 37.75    | 25       | 16.5     | 14.8     | 13.41    | 4.28     | 10.43    | 4.14     | 37.75    | 18.62    |
|                                                                                                                                                                                                                |  | 3.37    | 3.27    | 2.71    | 18.75   | 18.75    | 18.75    | 18.75    | 12.42    | 21.07    | 7.35     | 6.66     | 2.12     | 5.18     | 2.05     | 18.75    | 9.25     |
|                                                                                                                                                                                                                |  | 3.85    | 0.55    | 0.46    | 6.66    | 6.66     | 16.28    | 6.66     | 4.41     | 2.91     | 2.61     | 2.36     | 4.09     | 1.84     | 0.73     | 6.66     | 3.28     |
|                                                                                                                                                                                                                |  | 1.66    | 0.77    | 49.14   | 9.25    | 9.25     | 9.25     | 9.25     | 6.12     | 4.04     | 3.62     | 3.28     | 1.05     | 2.55     | 1.01     | 9.25     | 4.56     |
|                                                                                                                                                                                                                |  | 1.9     | 0.88    | 0.73    | 29.7    | 10.61    | 10.61    | 10.61    | 7.02     | 4.63     | 20.86    | 3.77     | 1.79     | 4.78     | 1.16     | 10.61    | 5.23     |
|                                                                                                                                                                                                                |  | 0.6     | 1.68    | 0.23    | 3.37    | 3.37     | 3.37     | 3.37     | 2.23     | 1.47     | 1.32     | 232.36   | 0.38     | 0.93     | 0.37     | 3.37     | 47.17    |
|                                                                                                                                                                                                                |  | 1.09    | 5.97    | 0.53    | 6.08    | 6.08     | 6.08     | 6.08     | 4.03     | 2.66     | 2.38     | 2.16     | 0.69     | 1.68     | 8.24     | 6.08     | 3        |
|                                                                                                                                                                                                                |  | 1.16    | 0.2     | 0.17    | 5.31    | 2.46     | 22.16    | 2.46     | 1.63     | 1.08     | 0.96     | 0.87     | 3.7      | 1.94     | 0.27     | 2.46     | 1.21     |
|                                                                                                                                                                                                                |  | 0.48    | 0.87    | 36      | 2.67    | 2.67     | 2.67     | 2.67     | 1.77     | 1.17     | 1.05     | 0.95     | 0.3      | 0.74     | 0.33     | 2.67     | 1.32     |
|                                                                                                                                                                                                                |  | 1.09    | 0.5     | 1.2     | 6.08    | 6.08     | 6.08     | 6.08     | 4.03     | 2.66     | 2.38     | 2.16     | 0.69     | 1.68     | 53.02    | 6.08     | 3        |
|                                                                                                                                                                                                                |  | 2.23    | 1.03    | 0.86    | 12.42   | 12.42    | 12.42    | 12.42    | 8.22     | 10.46    | 4.87     | 4.41     | 1.41     | 3.43     | 1.36     | 12.42    | 6.12     |
|                                                                                                                                                                                                                |  | 6.79    | 3.14    | 2.62    | 37.75   | 37.75    | 37.75    | 37.75    | 25       | 16.5     | 14.8     | 13.41    | 4.28     | 10.43    | 4.14     | 37.75    | 18.62    |
|                                                                                                                                                                                                                |  | 6.79    | 3.14    | 2.62    | 37.75   | 37.75    | 37.75    | 37.75    | 25       | 16.5     | 14.8     | 13.41    | 4.28     | 10.43    | 4.14     | 37.75    | 18.62    |
|                                                                                                                                                                                                                |  | 2.23    | 10.34   | 0.86    | 12.42   | 12.42    | 12.42    | 12.42    | 8.22     | 32.67    | 4.87     | 4.41     | 1.41     | 3.43     | 1.36     | 12.42    | 6.12     |
|                                                                                                                                                                                                                |  | 0.52    | 2.49    | 0.79    | 2.92    | 2.92     | 2.92     | 2.92     | 1.93     | 1.27     | 1.14     | 1.03     | 0.33     | 0.8      | 22.81    | 2.92     | 1.44     |
|                                                                                                                                                                                                                |  | 1.9     | 6.87    | 1.07    | 10.61   | 10.61    | 10.61    | 10.61    | 7.02     | 4.63     | 4.16     | 3.77     | 1.2      | 2.93     | 1.16     | 10.61    | 9.77     |
|                                                                                                                                                                                                                |  | 2.23    | 1.62    | 0.86    | 12.42   | 12.42    | 12.42    | 12.42    | 8.22     | 5.43     | 4.87     | 4.41     | 1.41     | 3.43     | 6        | 199.33   | 6.12     |
|                                                                                                                                                                                                                |  | 4.5     | 0.75    | 0.24    | 3.55    | 3.55     | 3.55     | 3.55     | 3.92     | 2.21     | 1.93     | 1.26     | 3.57     | 0.98     | 0.39     | 3.55     | 1.75     |
|                                                                                                                                                                                                                |  | 1.9     | 14.16   | 0.73    | 10.61   | 10.61    | 10.61    | 10.61    | 7.02     | 4.63     | 4.16     | 3.77     | 1.2      | 2.93     | 1.16     | 29.7     | 5.23     |
|                                                                                                                                                                                                                |  | 2.23    | 1.62    | 0.86    | 12.42   | 12.42    | 12.42    | 12.42    | 8.22     | 5.43     | 9.12     | 4.41     | 1.41     | 17.52    | 1.36     | 12.42    | 6.12     |

EBNA-3B\_type1 : grouping per country – Max MCC

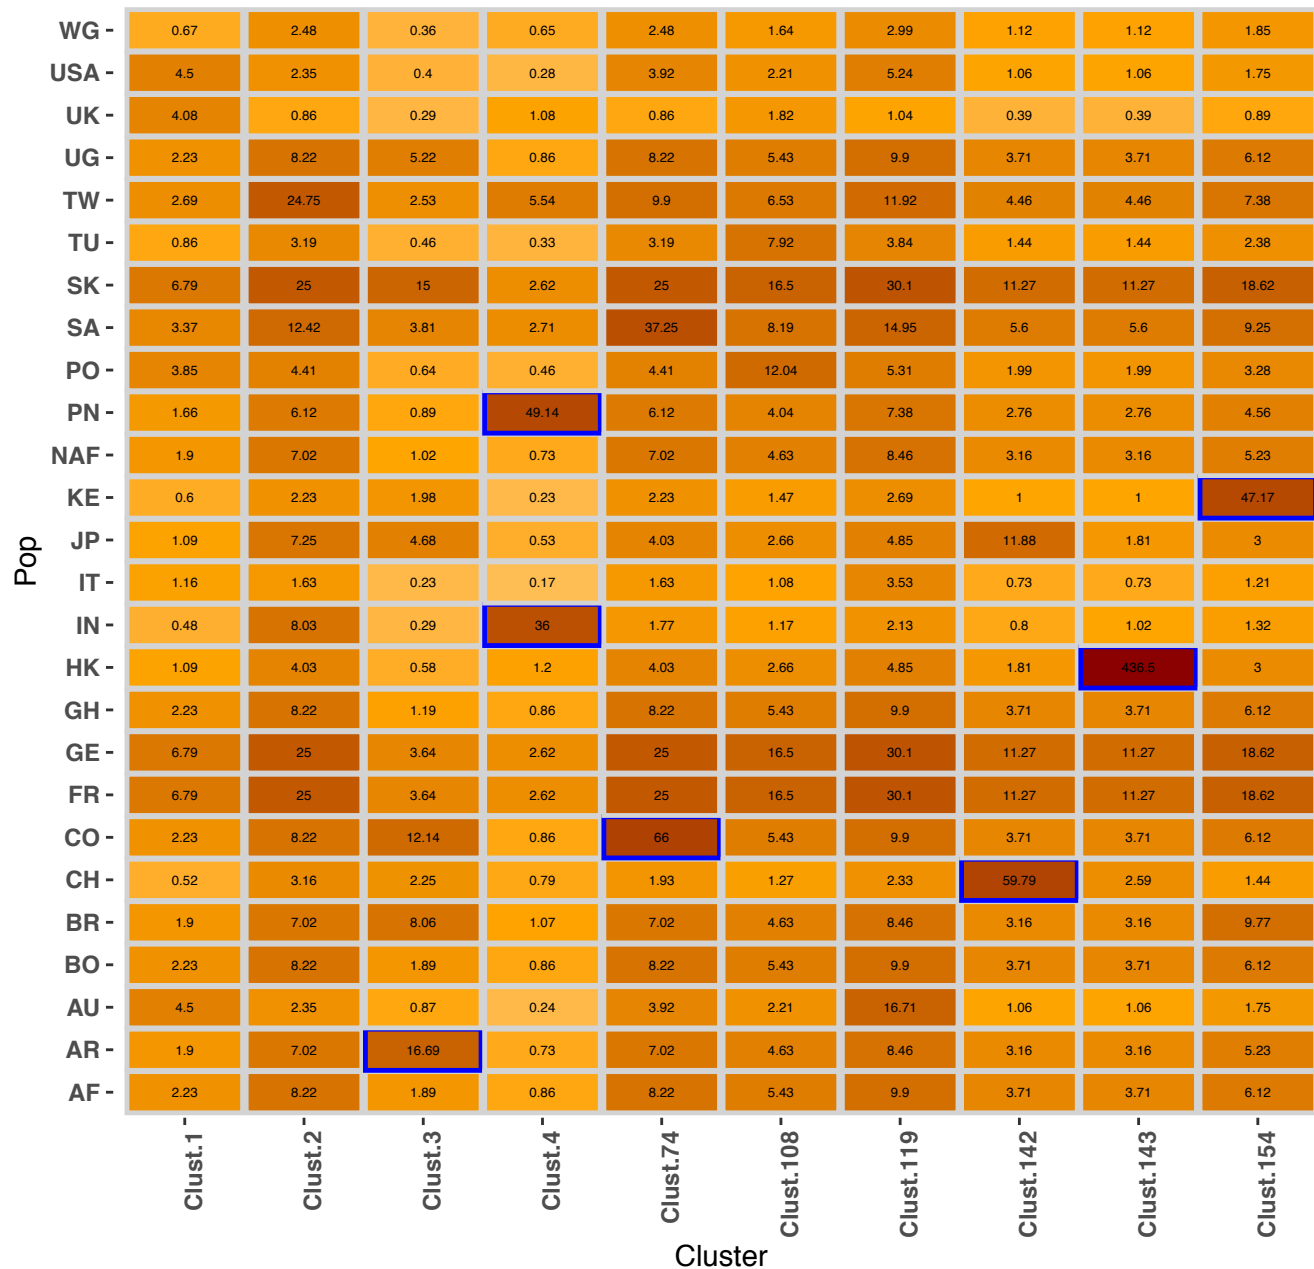

EBNA-3B\_type1 : grouping per continent – max CGS

Pop

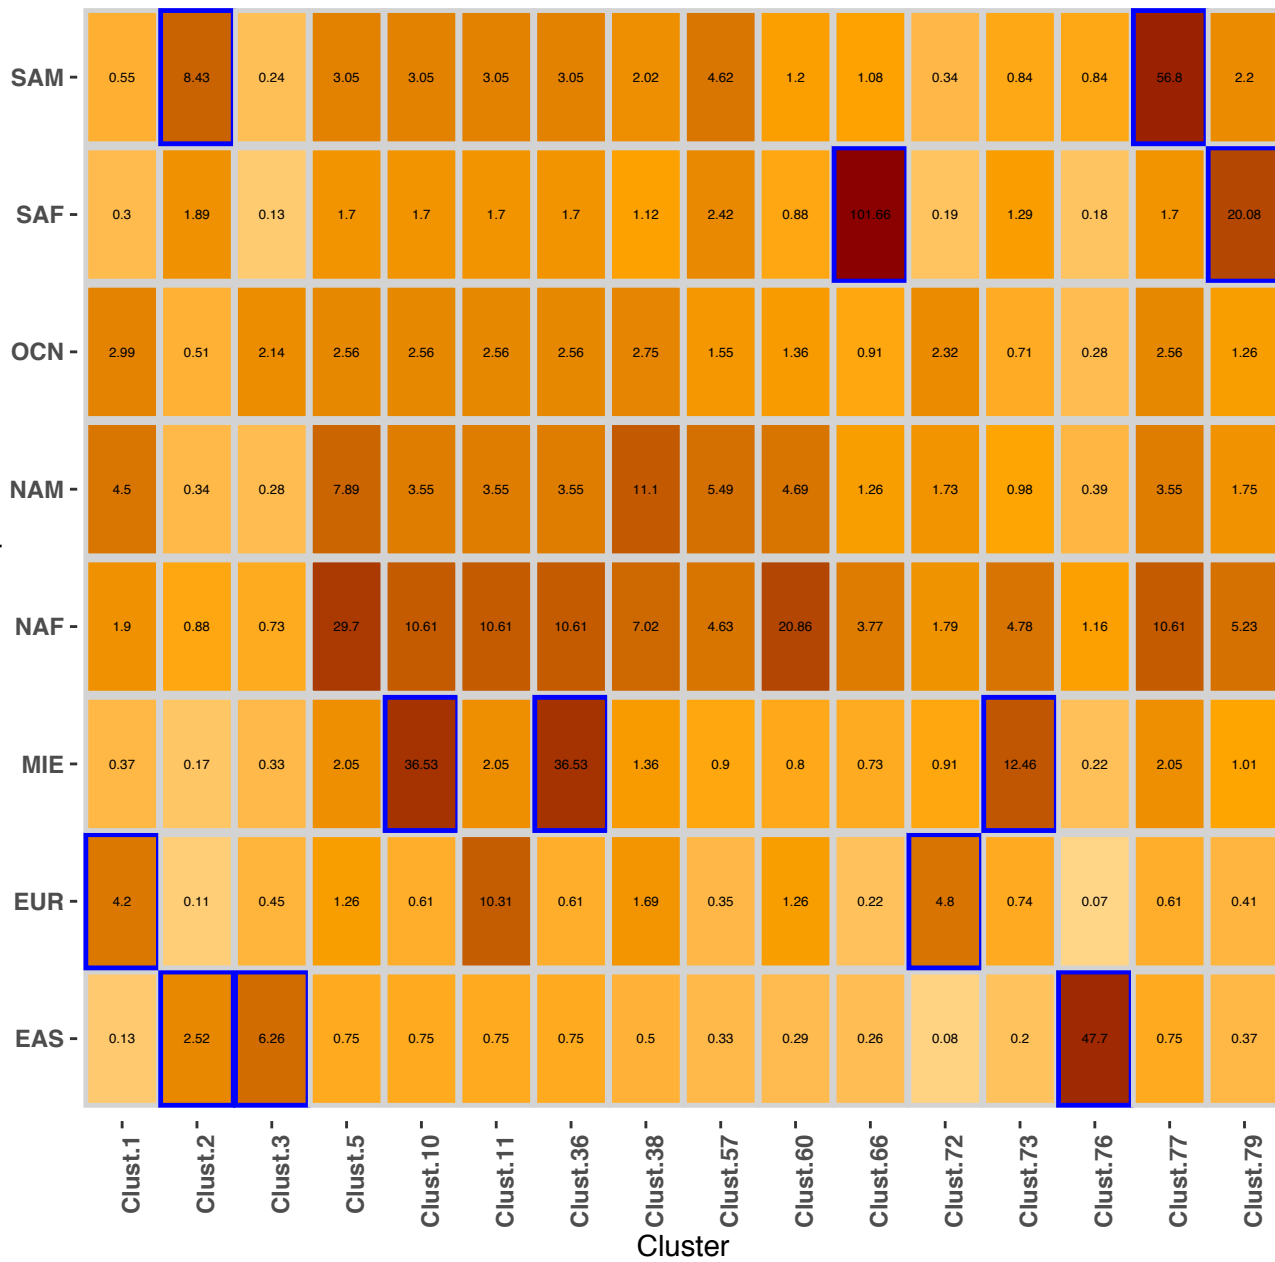

EBNA-3B\_type1 : grouping per continent – Max MCC

Pop

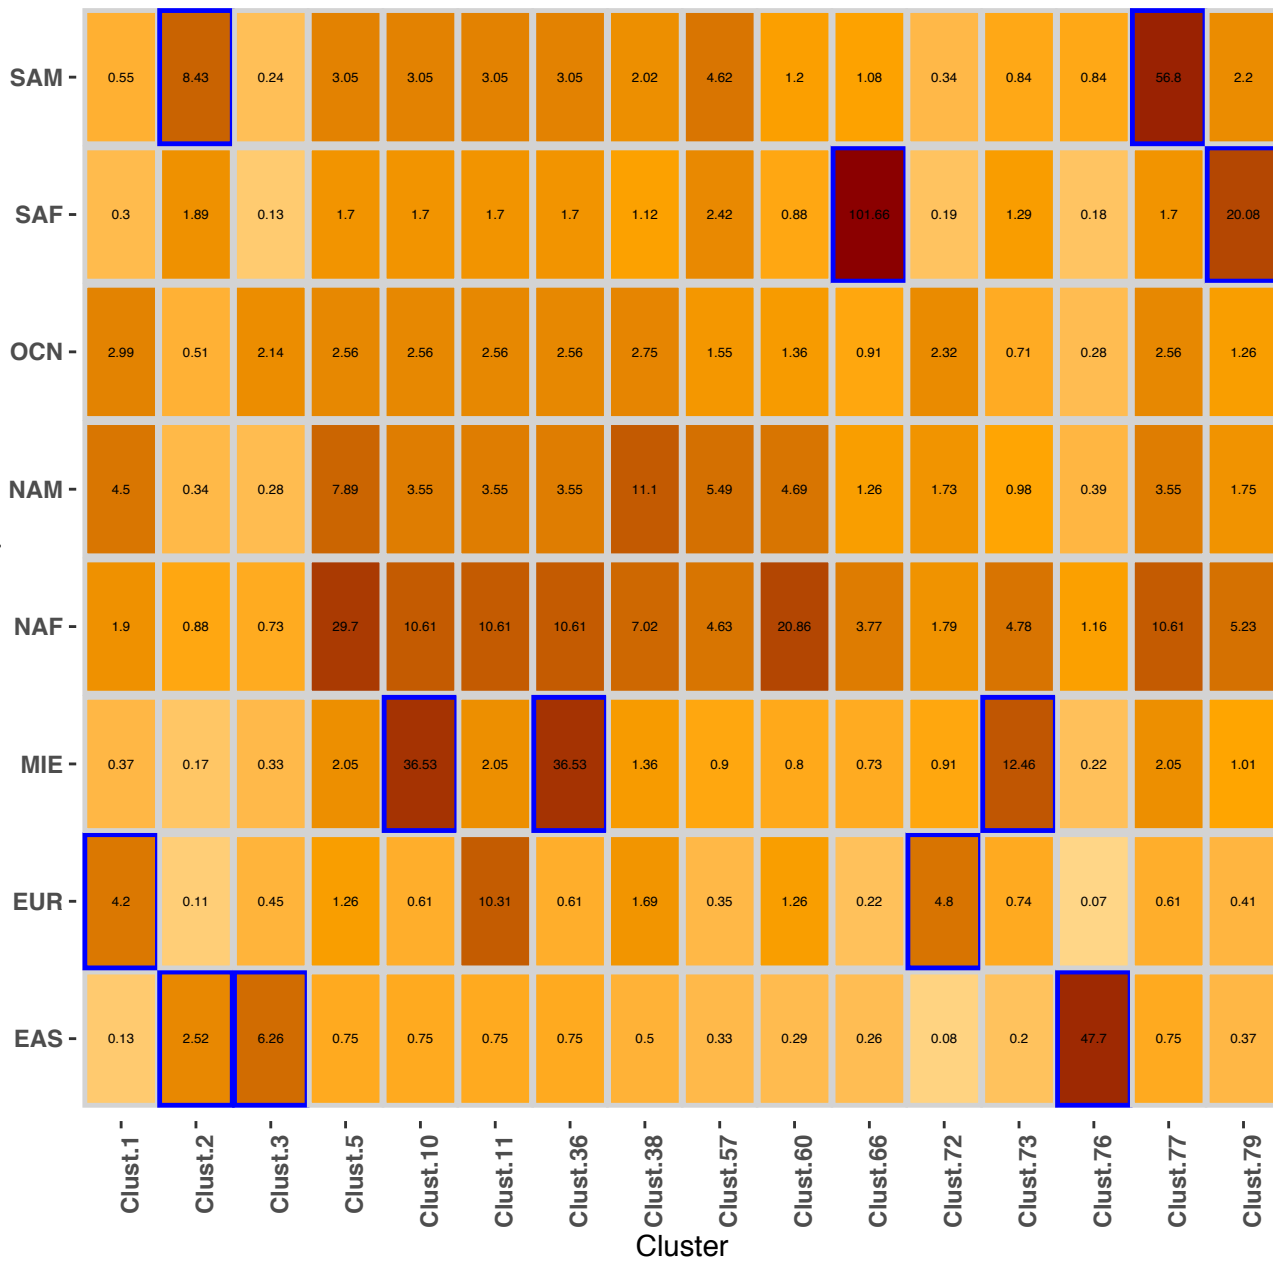

### EBNA-3C\_type1 : grouping per country – max CGS

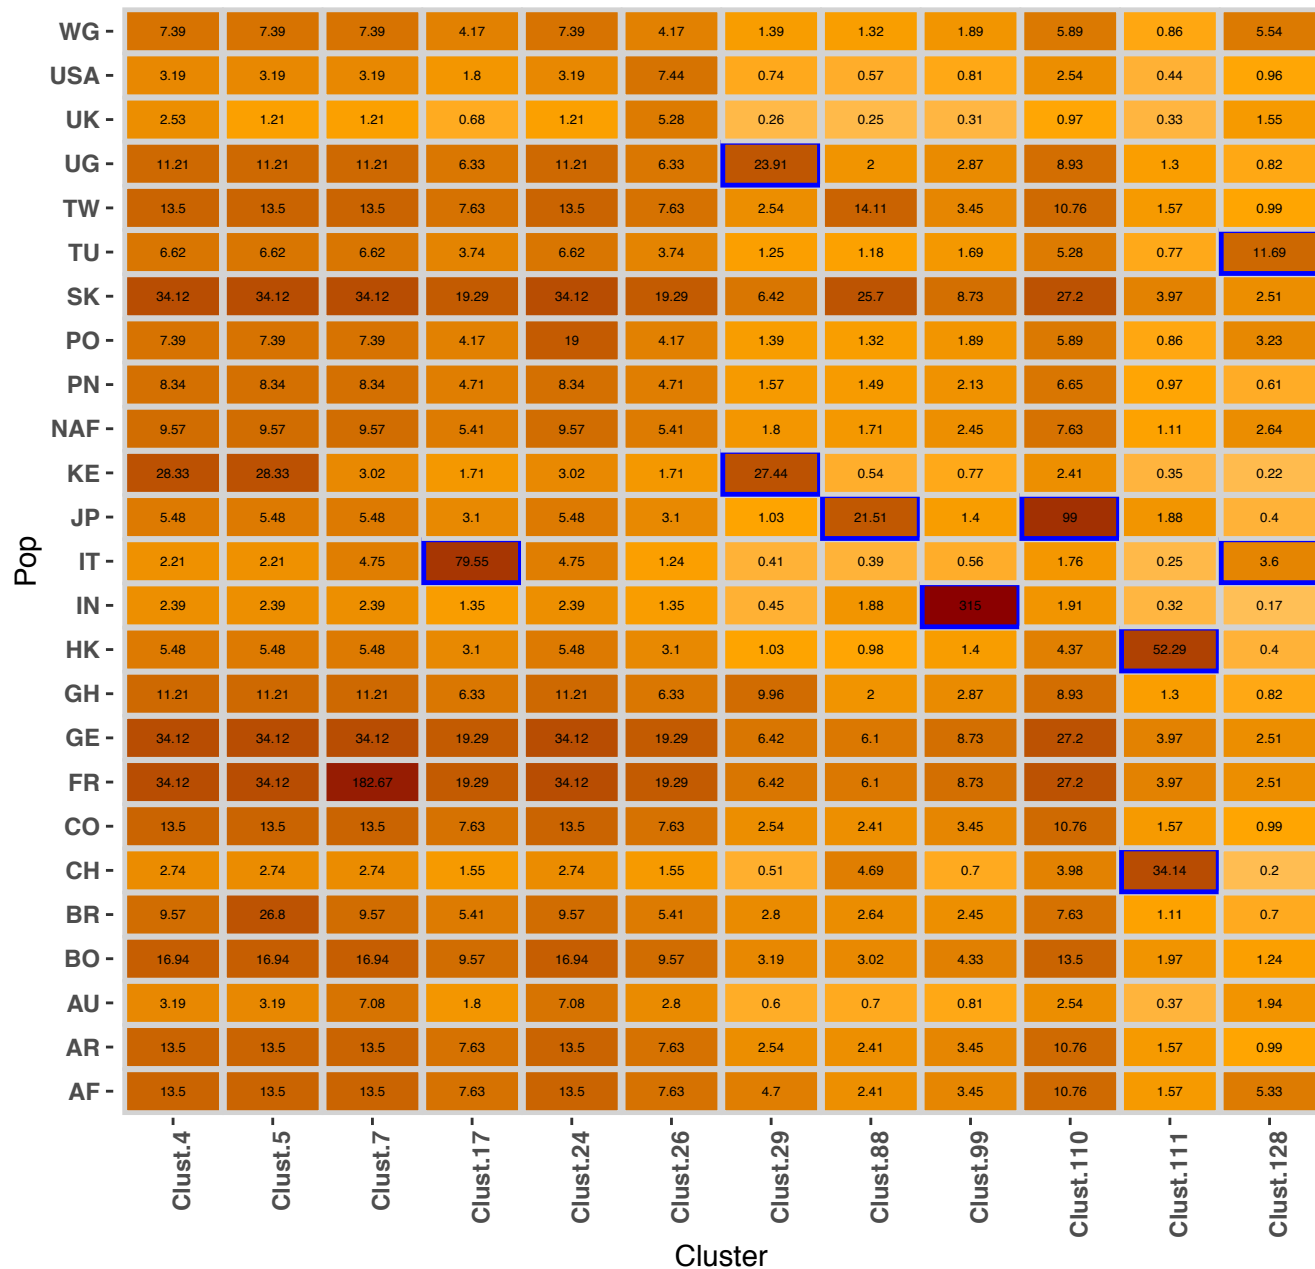

# EBNA-3C\_type1 : grouping per country – Max MCC

Pop

|       |         |         |          |           |           |           |           |           |
|-------|---------|---------|----------|-----------|-----------|-----------|-----------|-----------|
| WG -  | 7.39    | 7.39    | 1.39     | 1.32      | 1.89      | 5.89      | 0.86      | 5.54      |
| USA - | 3.19    | 3.19    | 0.74     | 0.57      | 0.81      | 2.54      | 0.44      | 0.96      |
| UK -  | 2.53    | 1.21    | 0.26     | 0.25      | 0.31      | 0.97      | 0.33      | 1.55      |
| UG -  | 11.21   | 11.21   | 23.91    | 2         | 2.87      | 8.93      | 1.3       | 0.82      |
| TW -  | 13.5    | 13.5    | 2.54     | 14.11     | 3.45      | 10.76     | 1.57      | 0.99      |
| TU -  | 6.62    | 6.62    | 1.25     | 1.18      | 1.69      | 5.28      | 0.77      | 11.69     |
| SK -  | 34.12   | 34.12   | 6.42     | 25.7      | 8.73      | 27.2      | 3.97      | 2.51      |
| PO -  | 7.39    | 7.39    | 1.39     | 1.32      | 1.89      | 5.89      | 0.86      | 3.23      |
| PN -  | 8.34    | 8.34    | 1.57     | 1.49      | 2.13      | 6.65      | 0.97      | 0.61      |
| NAF - | 9.57    | 9.57    | 1.8      | 1.71      | 2.45      | 7.63      | 1.11      | 2.64      |
| KE -  | 28.33   | 28.33   | 27.44    | 0.54      | 0.77      | 2.41      | 0.35      | 0.22      |
| JP -  | 5.48    | 5.48    | 1.03     | 21.51     | 1.4       | 99        | 1.88      | 0.4       |
| IT -  | 2.21    | 2.21    | 0.41     | 0.39      | 0.56      | 1.76      | 0.25      | 3.6       |
| IN -  | 2.39    | 2.39    | 0.45     | 1.88      | 315       | 1.91      | 0.32      | 0.17      |
| HK -  | 5.48    | 5.48    | 1.03     | 0.98      | 1.4       | 4.37      | 52.29     | 0.4       |
| GH -  | 11.21   | 11.21   | 9.96     | 2         | 2.87      | 8.93      | 1.3       | 0.82      |
| GE -  | 34.12   | 34.12   | 6.42     | 6.1       | 8.73      | 27.2      | 3.97      | 2.51      |
| FR -  | 34.12   | 34.12   | 6.42     | 6.1       | 8.73      | 27.2      | 3.97      | 2.51      |
| CO -  | 13.5    | 13.5    | 2.54     | 2.41      | 3.45      | 10.76     | 1.57      | 0.99      |
| CH -  | 2.74    | 2.74    | 0.51     | 4.69      | 0.7       | 3.98      | 34.14     | 0.2       |
| BR -  | 9.57    | 26.8    | 2.8      | 2.64      | 2.45      | 7.63      | 1.11      | 0.7       |
| BO -  | 16.94   | 16.94   | 3.19     | 3.02      | 4.33      | 13.5      | 1.97      | 1.24      |
| AU -  | 3.19    | 3.19    | 0.6      | 0.7       | 0.81      | 2.54      | 0.37      | 1.94      |
| AR -  | 13.5    | 13.5    | 2.54     | 2.41      | 3.45      | 10.76     | 1.57      | 0.99      |
| AF -  | 13.5    | 13.5    | 4.7      | 2.41      | 3.45      | 10.76     | 1.57      | 5.33      |
|       | Clust.4 | Clust.5 | Clust.41 | Clust.101 | Clust.112 | Clust.123 | Clust.124 | Clust.141 |

Cluster

EBNA-3C\_type1 : grouping per continent – max CGS

Pop

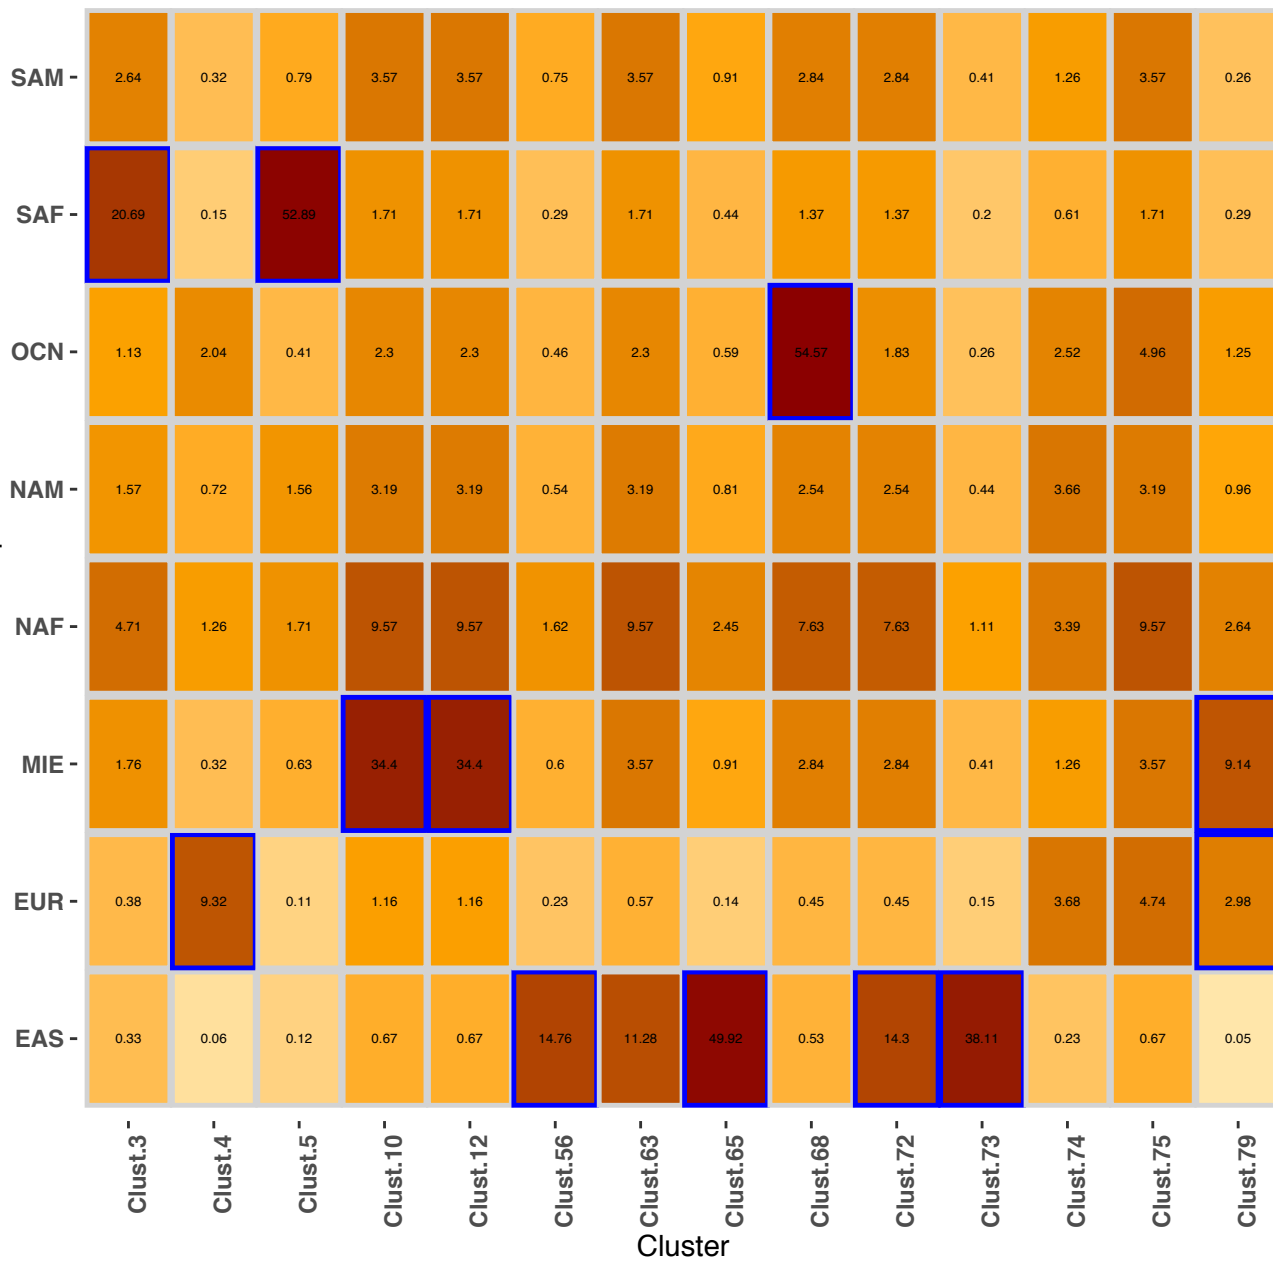



EBNA-3C\_type1 : grouping per continent – Max MCC

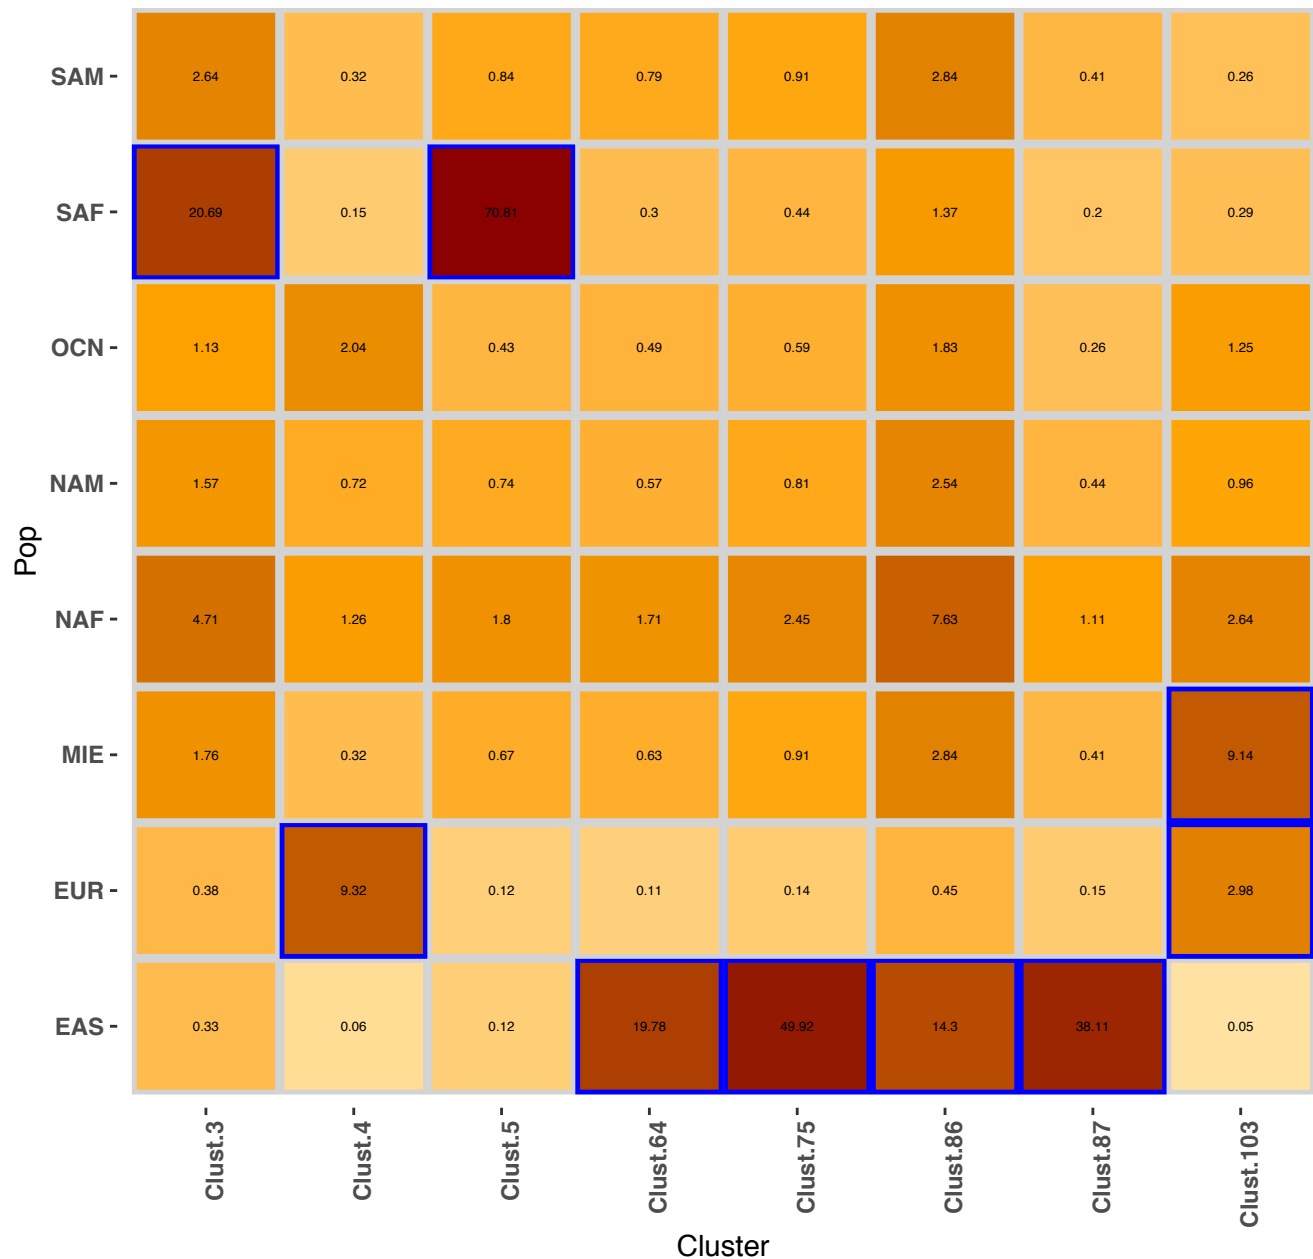



# LMP-2A : grouping per country – Max MCC

Pop

|       |         |          |          |          |          |          |          |          |
|-------|---------|----------|----------|----------|----------|----------|----------|----------|
| WG -  | 0.39    | 2.69     | 1.18     | 1.87     | 1.5      | 1.78     | 10.22    | 0.46     |
| USA - | 0.49    | 3.43     | 2.1      | 1.7      | 0.66     | 2.27     | 1.5      | 3.89     |
| UK -  | 0.88    | 1.59     | 0.69     | 4.55     | 0.92     | 1.05     | 0.89     | 0.67     |
| UG -  | 1.78    | 12.36    | 5.41     | 0.64     | 4.7      | 8.19     | 1.33     | 2.13     |
| TW -  | 9.45    | 14.46    | 6.33     | 0.75     | 0.73     | 21.56    | 1.55     | 2.49     |
| TU -  | 0.71    | 4.94     | 3.15     | 1.07     | 1.05     | 5.57     | 3.55     | 1.06     |
| SK -  | 6.33    | 43.88    | 19.22    | 2.27     | 9.09     | 29.08    | 4.72     | 7.57     |
| SA -  | 2.51    | 17.4     | 7.62     | 0.9      | 1.52     | 11.53    | 10.29    | 3        |
| PO -  | 1.23    | 8.57     | 3.76     | 3.88     | 0.56     | 5.68     | 2.89     | 2.03     |
| PN -  | 1.02    | 152.89   | 3.11     | 0.37     | 0.36     | 4.71     | 0.76     | 1.62     |
| NG -  | 4.21    | 29.17    | 12.78    | 1.51     | 1.48     | 19.33    | 3.14     | 5.03     |
| NAF - | 1.78    | 12.36    | 5.41     | 0.92     | 2.31     | 8.19     | 1.33     | 8.66     |
| KE -  | 0.43    | 3.02     | 1.32     | 0.15     | 2.63     | 2        | 1.3      | 0.62     |
| JP -  | 0.94    | 6.54     | 2.86     | 0.34     | 3.43     | 4.33     | 0.7      | 1.13     |
| IT -  | 0.42    | 2.9      | 1.27     | 3.64     | 0.77     | 1.92     | 0.35     | 3.17     |
| IN -  | 0.51    | 3.02     | 1.32     | 0.15     | 0.15     | 2        | 0.32     | 0.62     |
| HK -  | 264     | 7.1      | 3.11     | 0.37     | 0.36     | 4.71     | 0.76     | 1.22     |
| GH -  | 1.78    | 12.36    | 5.41     | 0.64     | 0.63     | 8.19     | 1.33     | 8.66     |
| GE -  | 6.33    | 43.88    | 19.22    | 2.27     | 2.23     | 29.08    | 4.72     | 7.57     |
| FR -  | 6.33    | 43.88    | 19.22    | 9.27     | 2.23     | 29.08    | 4.72     | 7.57     |
| CO -  | 1.23    | 8.57     | 3.76     | 0.44     | 2.33     | 5.68     | 1.22     | 1.48     |
| CH -  | 9.21    | 3.28     | 1.44     | 0.17     | 0.18     | 3.54     | 0.35     | 0.56     |
| BR -  | 1.78    | 12.36    | 5.41     | 0.64     | 0.9      | 8.19     | 1.33     | 2.13     |
| BO -  | 1.12    | 7.77     | 113.67   | 0.4      | 0.5      | 28.42    | 0.83     | 1.34     |
| AU -  | 0.57    | 3.95     | 1.73     | 4.24     | 2.04     | 2.62     | 0.42     | 0.68     |
| AR -  | 1.23    | 8.57     | 6.04     | 0.44     | 1.3      | 5.68     | 1.22     | 2.03     |
| AF -  | 1.55    | 10.78    | 4.72     | 0.56     | 3.52     | 7.15     | 1.16     | 2.73     |
|       | Clust.1 | Clust.12 | Clust.33 | Clust.34 | Clust.36 | Clust.60 | Clust.63 | Clust.64 |

Cluster

**LMP-2A : grouping per continent – max CGS**

Pop

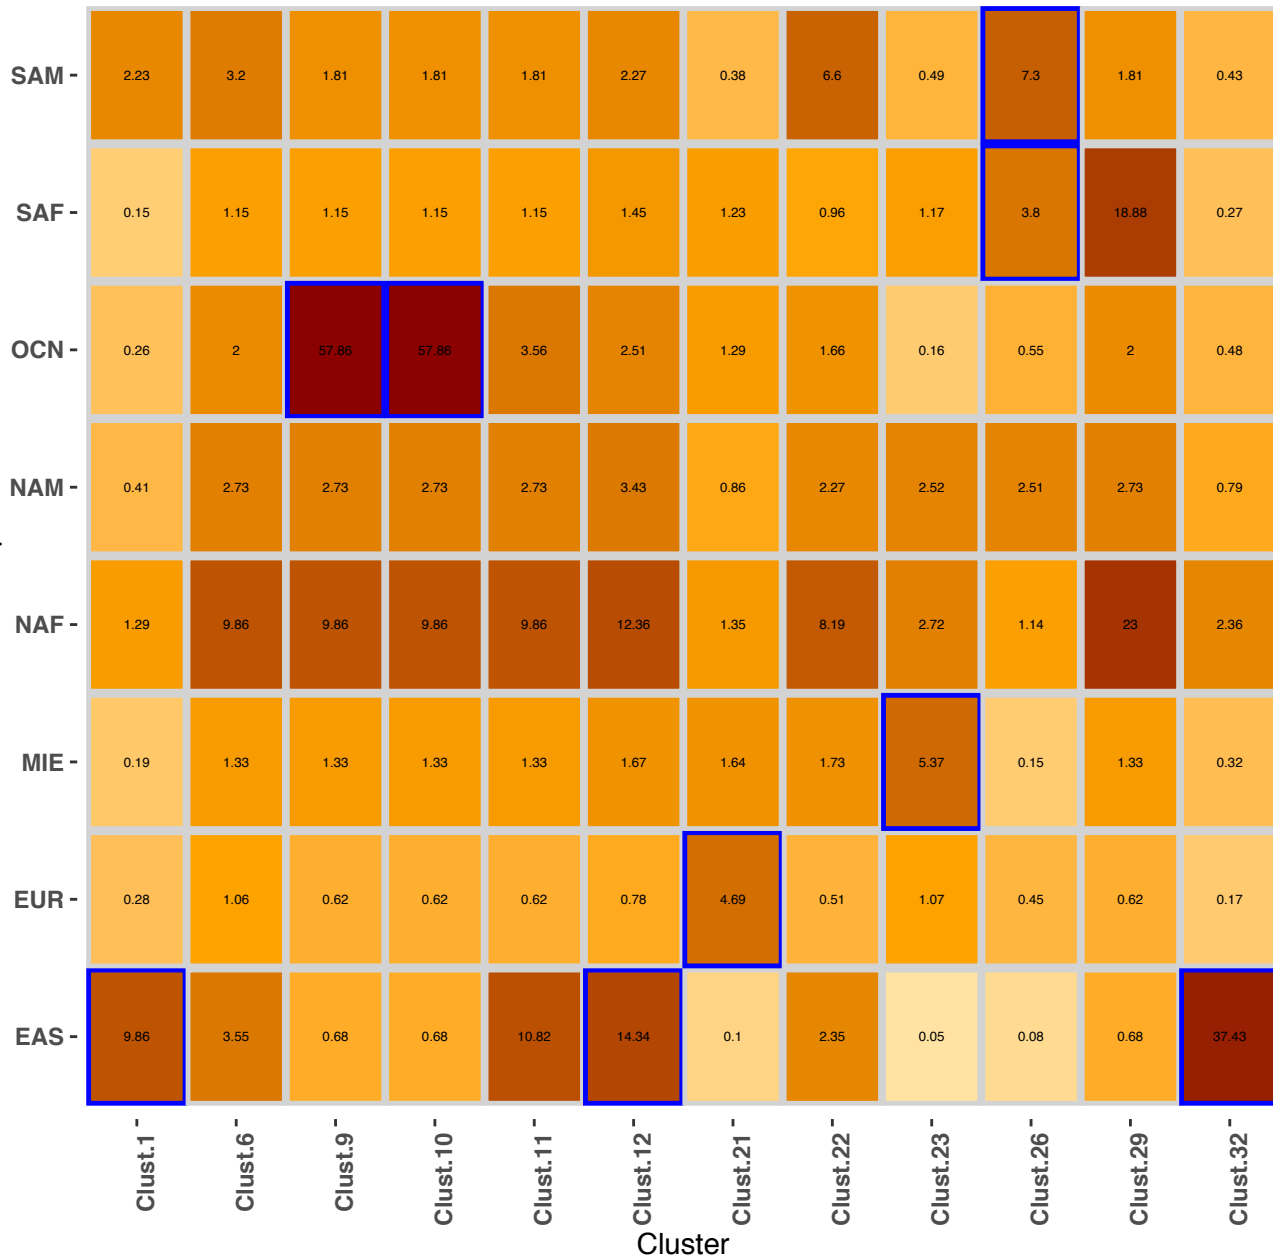

**LMP-2A : grouping per continent – Max MCC**

Pop

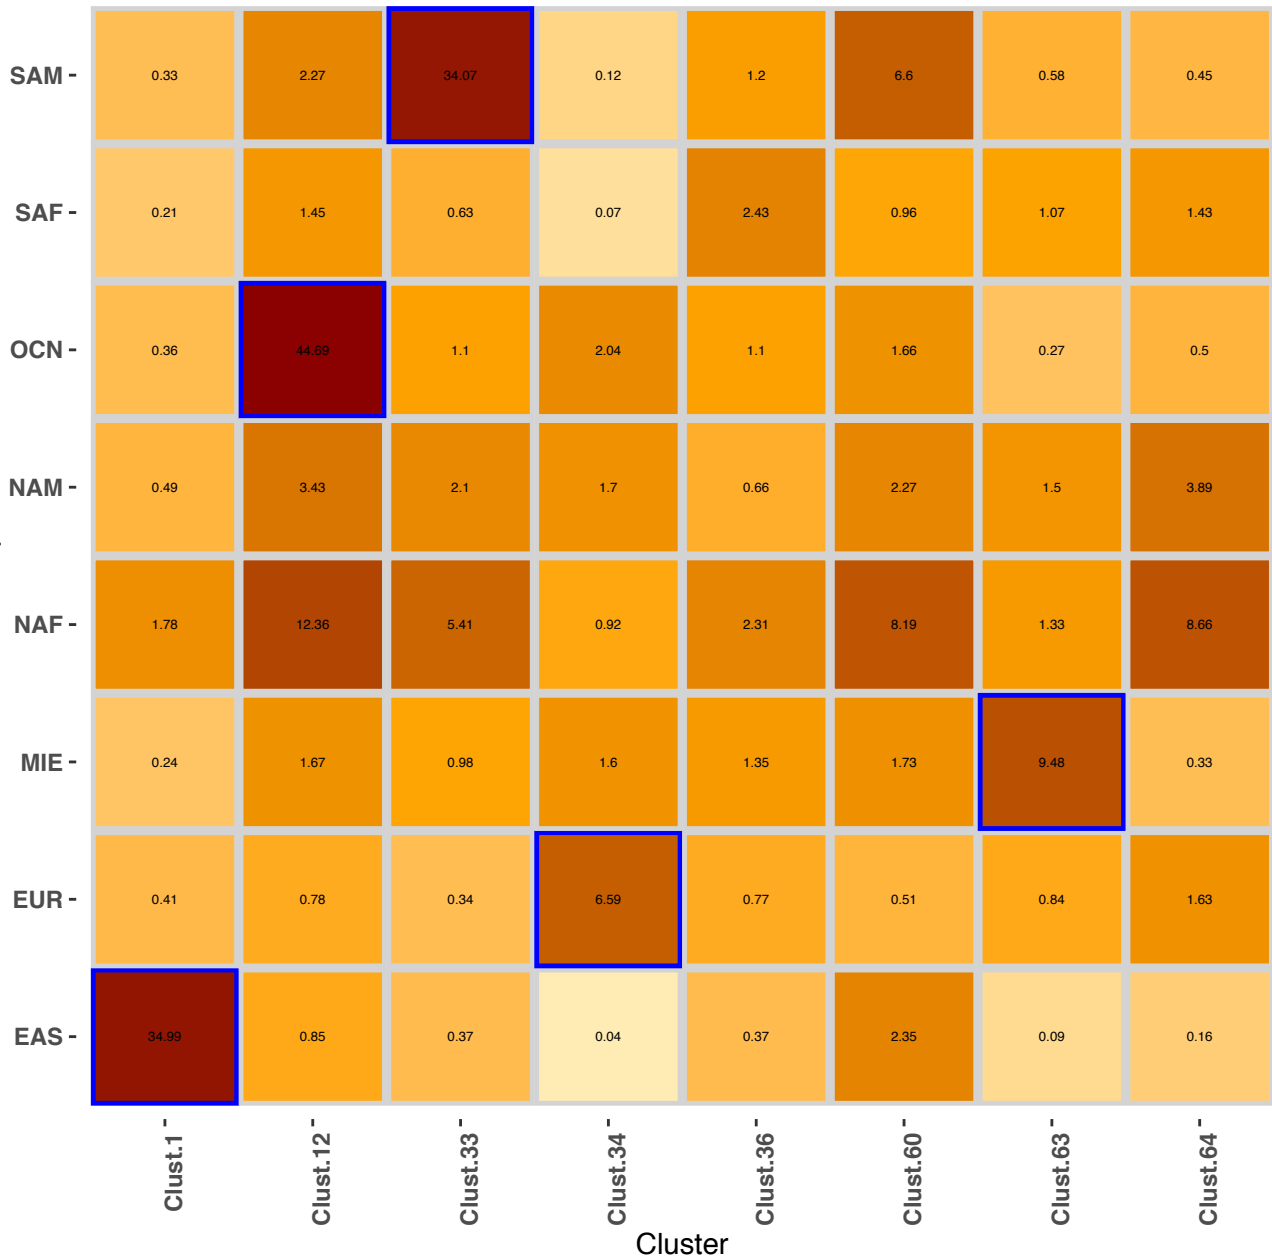

Supplement: s1 [file s1]
