# Supplementary material for: Expanding the Geographic Characterisation of Epstein–Barr Virus Variation through Gene-Based Approaches
Source: MDPI journal article supplement (doi:10.3390/microorganisms8111686), 2020-10-29

### **Supplementary Figure 8**

**Gene's phylogenies selected clusterings.** The gene phylogenies are reported coloured by country of origin, together with the same phylogenies coloured per max CGS clustering against country of origin, max CGS clustering against continent of origin, max MCC clustering against country of origin, and max MCC clustering against continent of origin. The black colour identifies isolates falling in clusters with less than 3 individuals, and that were in consequence excluded from the analysis.

# BDLF4

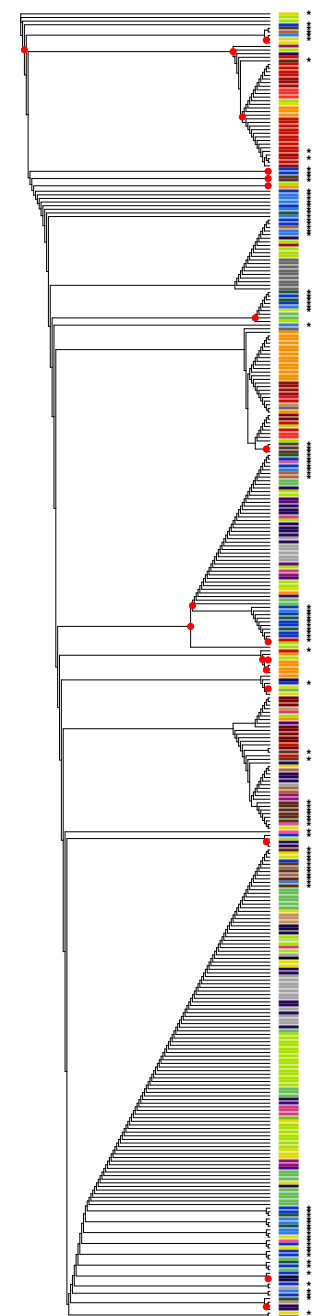

Country of origin

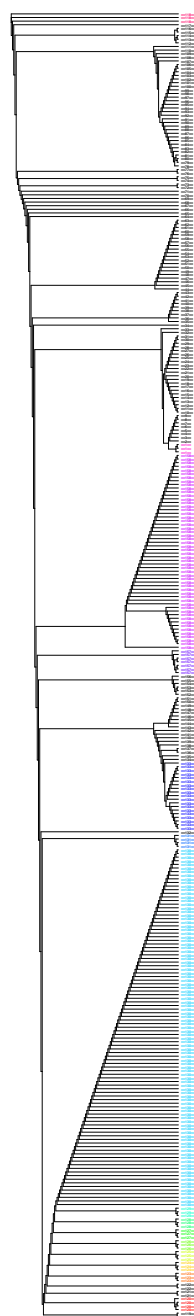

Max CGS(country)

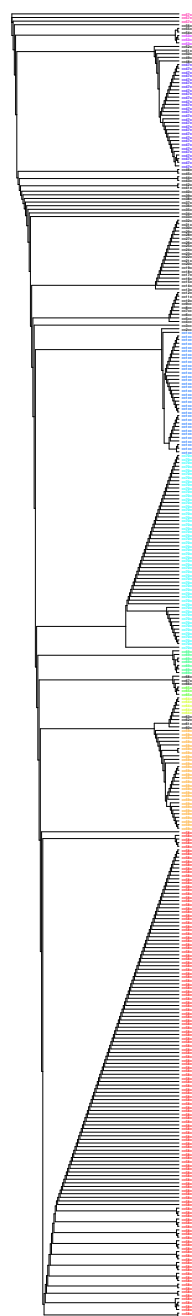

Max MCC (country)

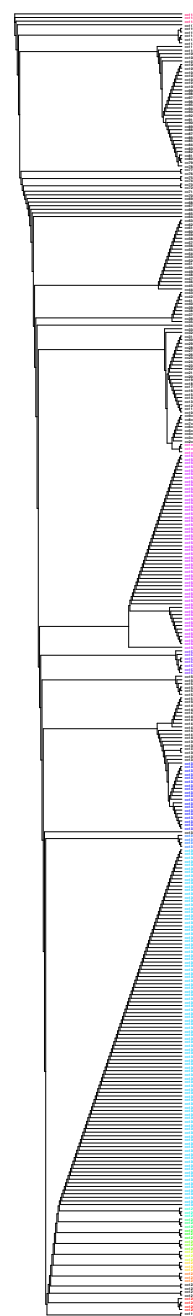

Max CGS(continent)

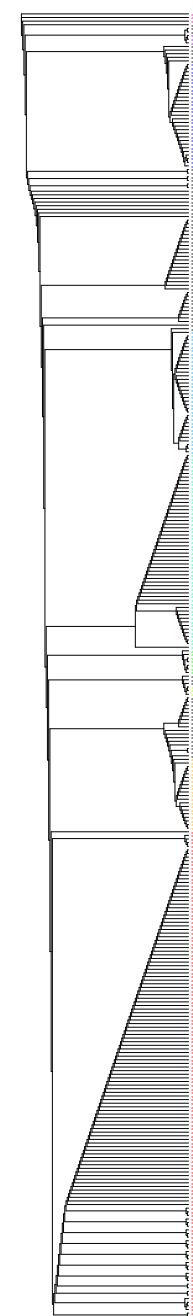

Max MCC (continent)

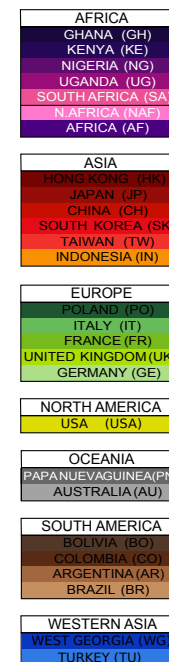

# BGLF4

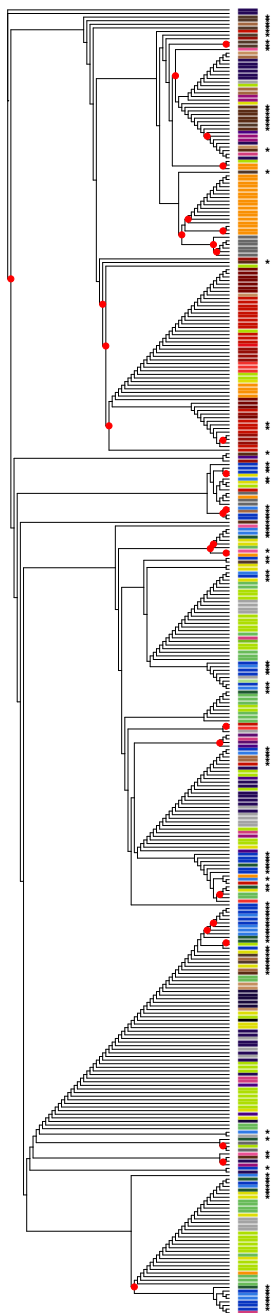

Country of origin

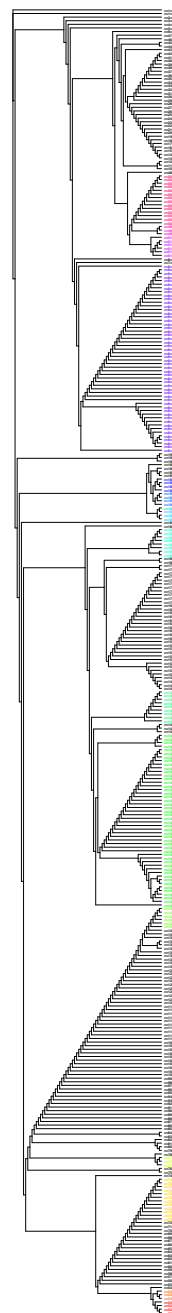

Max CGS(country)

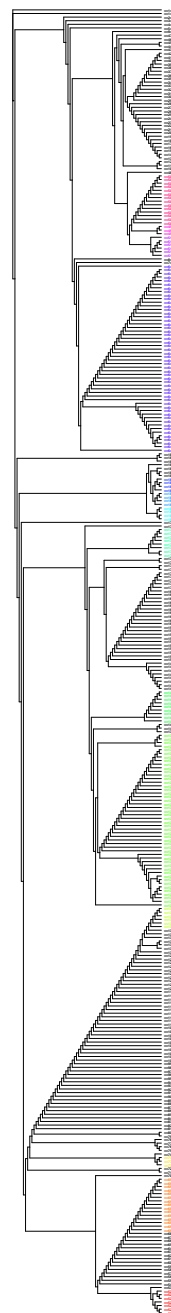

Max MCC (country)

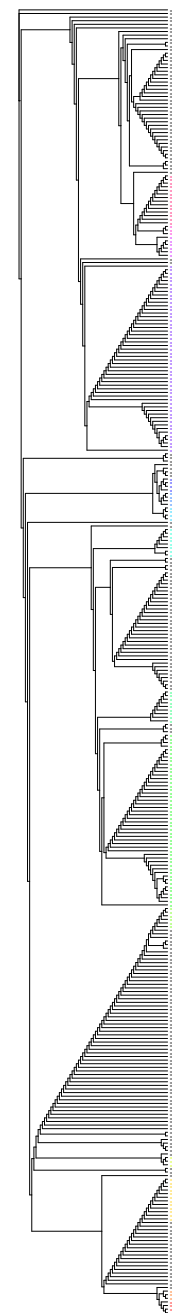

Max CGS(continent)

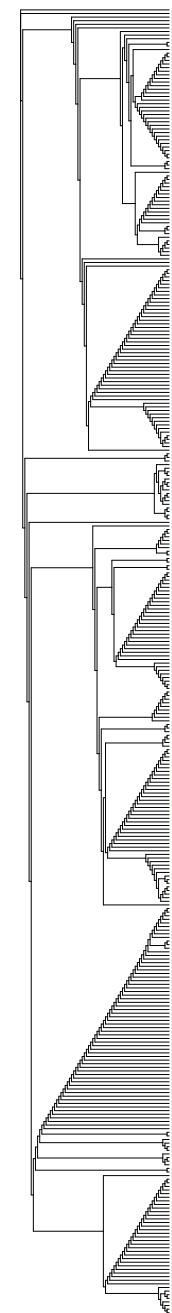

Max MCC (continent)

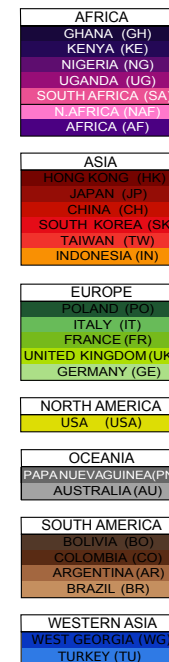

# BHRF1

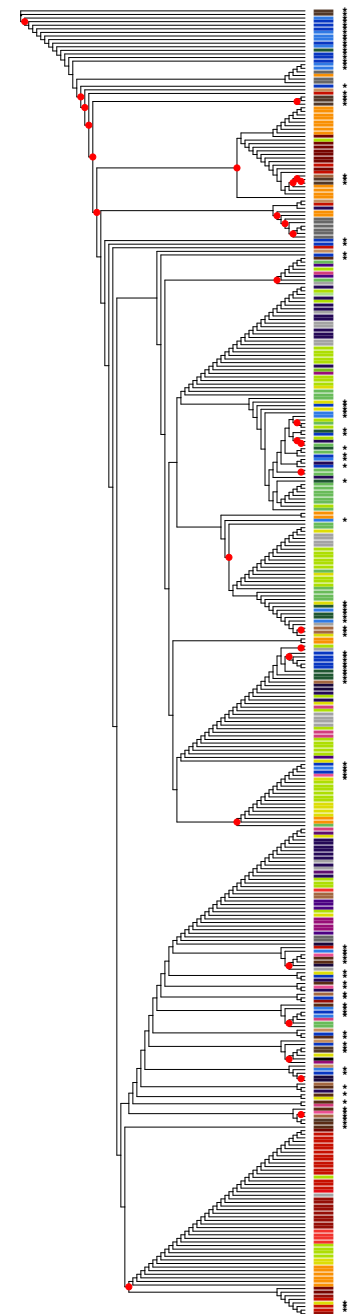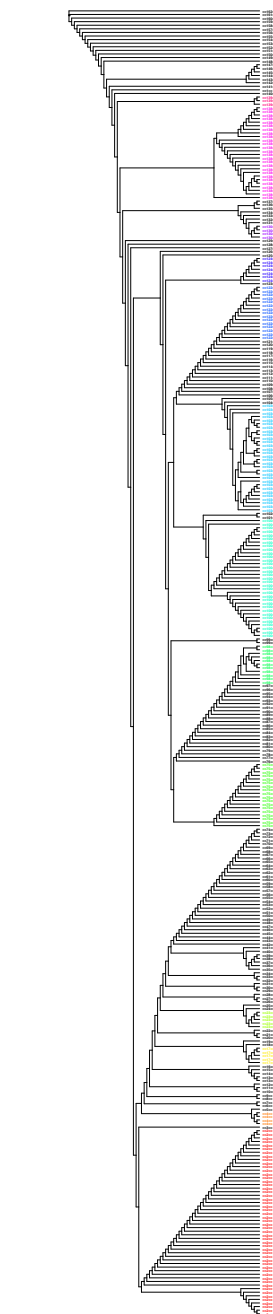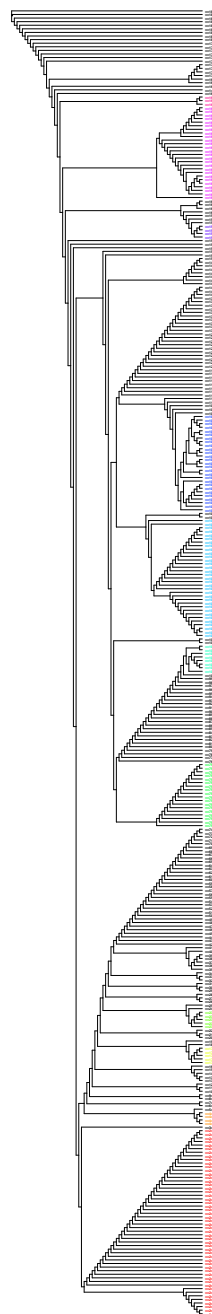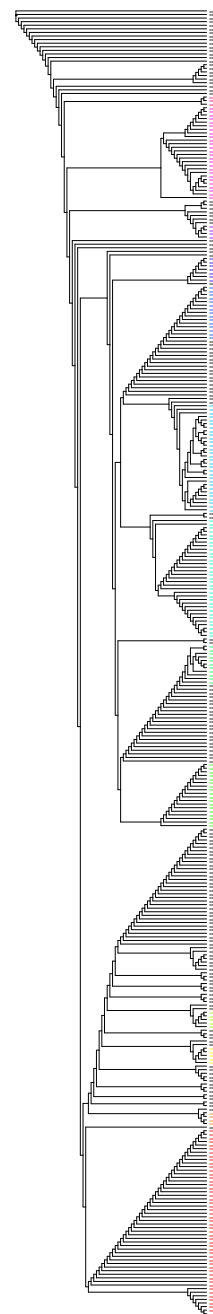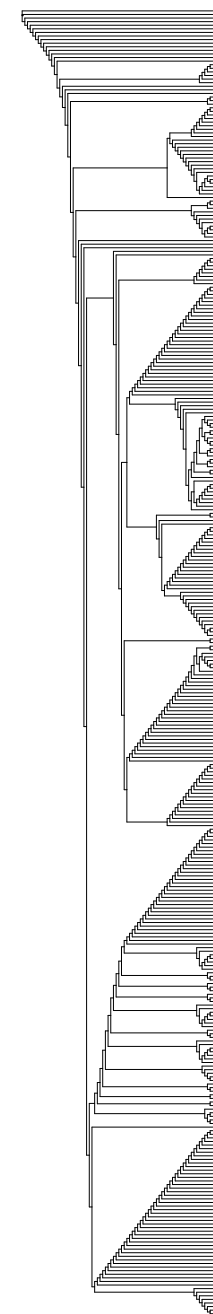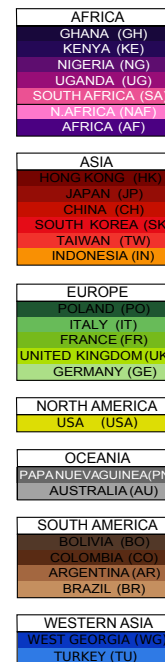

Country of origin

Max CGS(country)

Max MCC (country)

Max CGS(continent)

Max MCC (continent)

# BRLF1

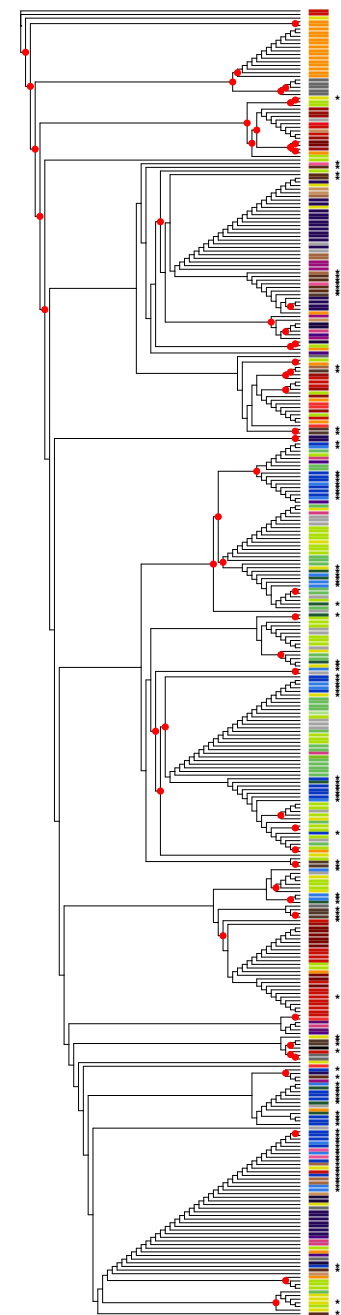

Country of origin

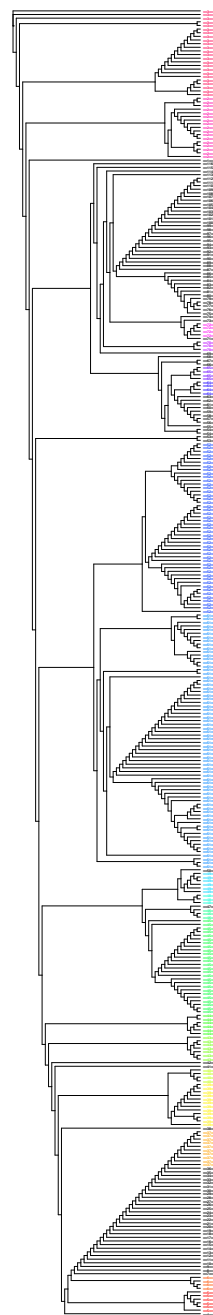

Max CGS(country)

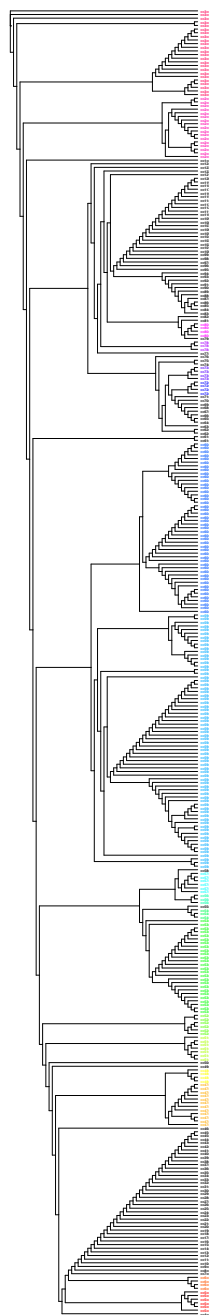

Max MCC(country)

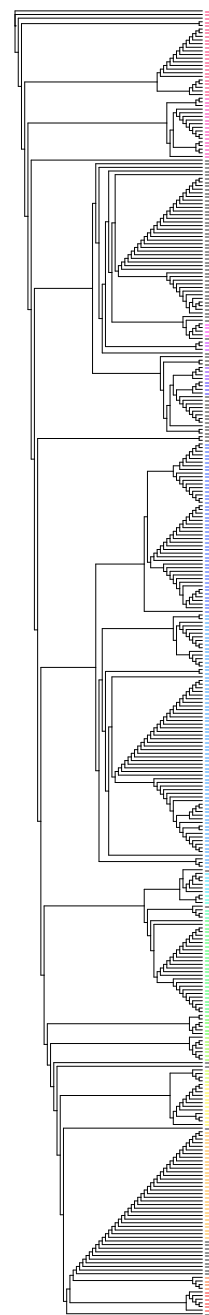

Max CGS(continent)

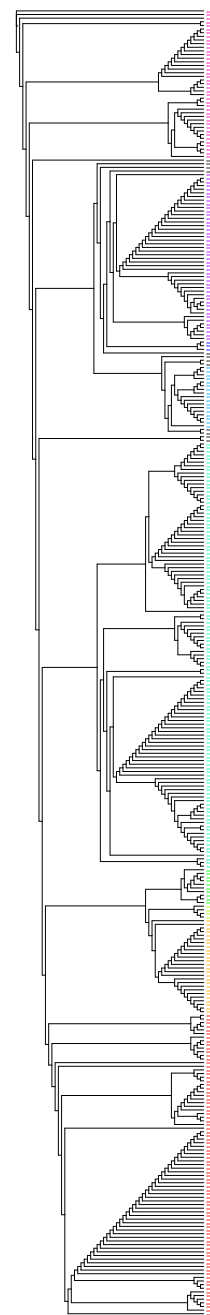

Max MCC(continent)

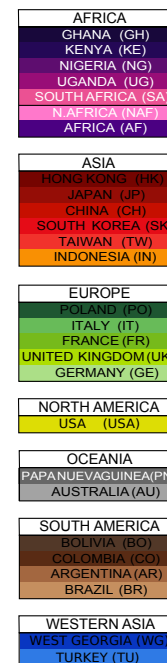

# BZLF1

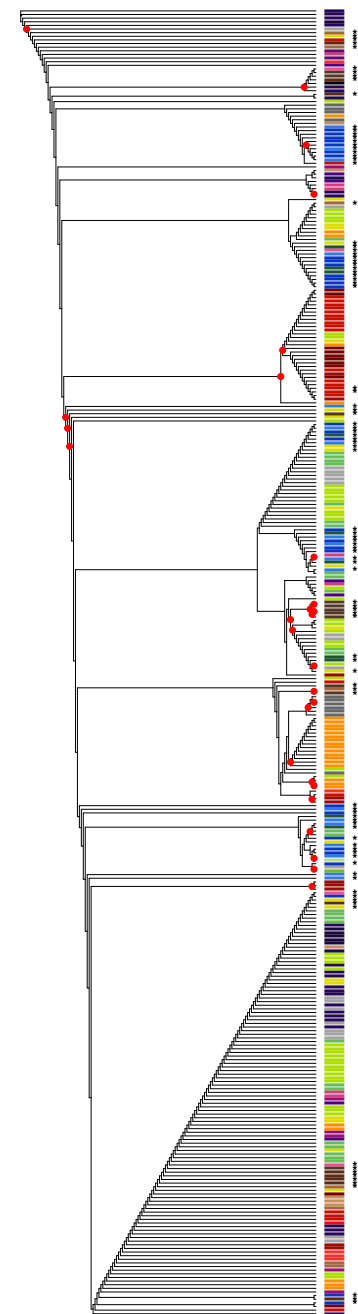

Country of origin

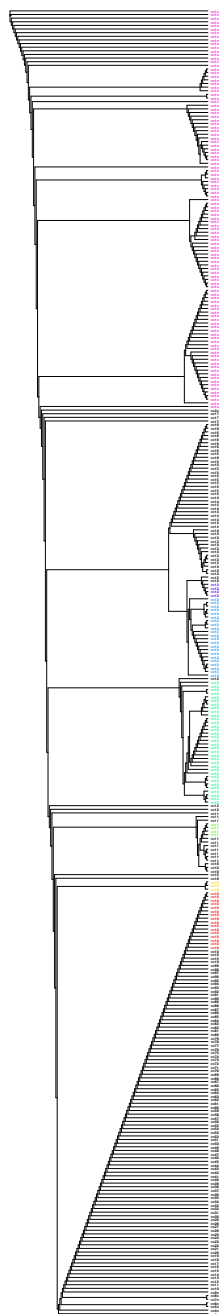

Max CGS(country)

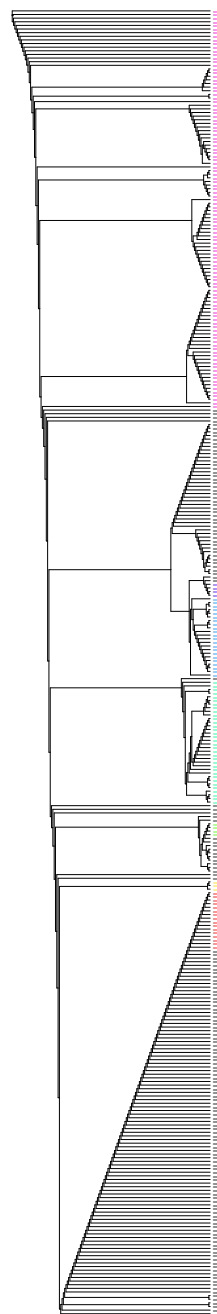

Max MCC (country)

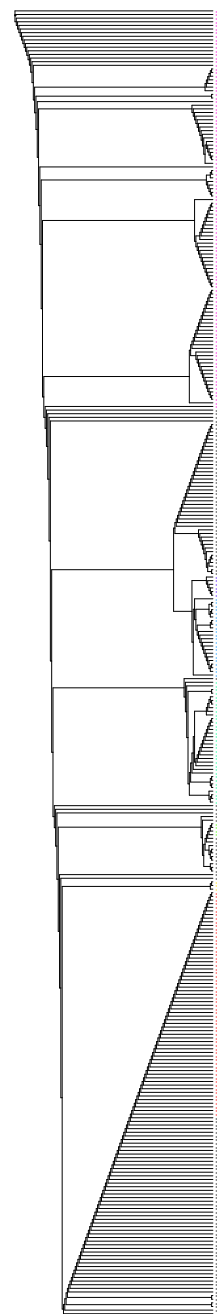

Max CGS(continent)

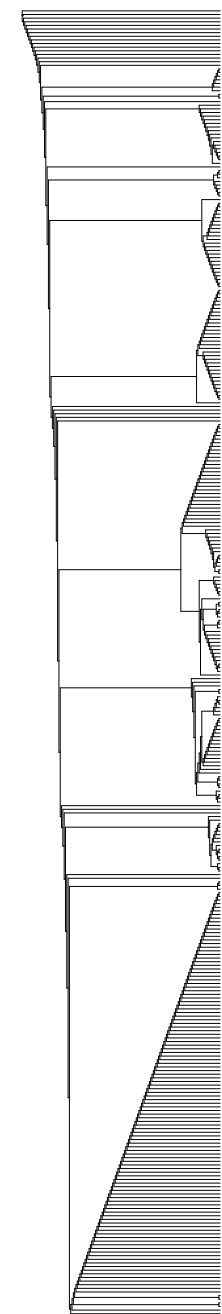

Max MCC (continent)

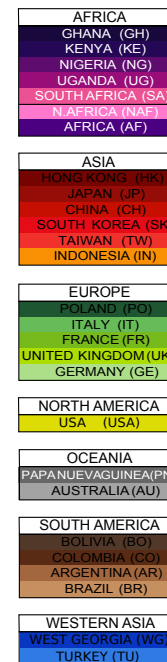

# EBER-1

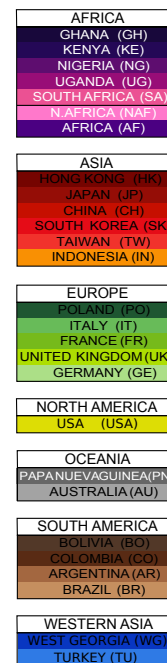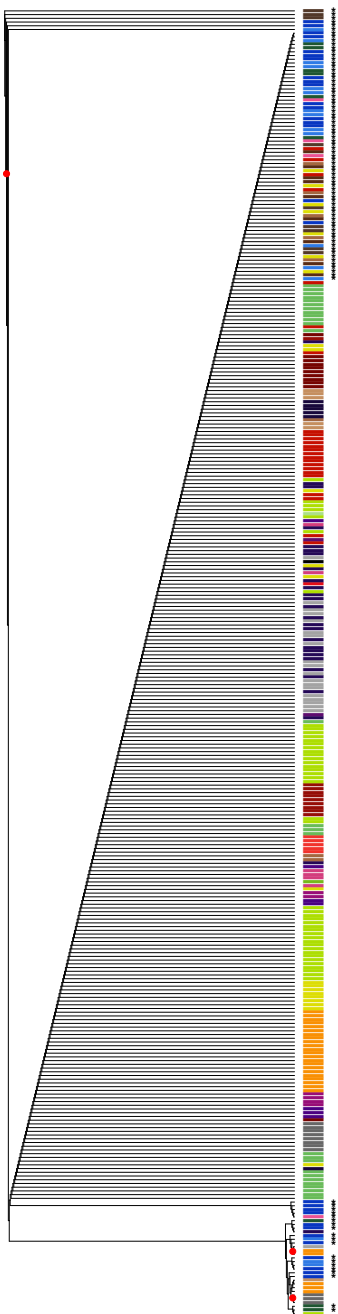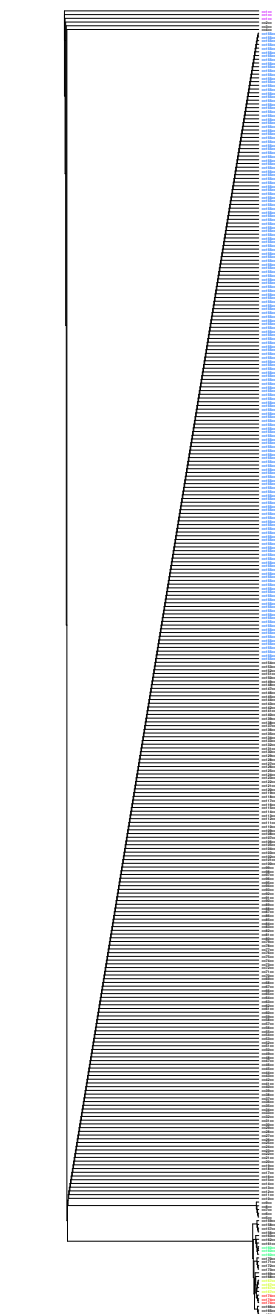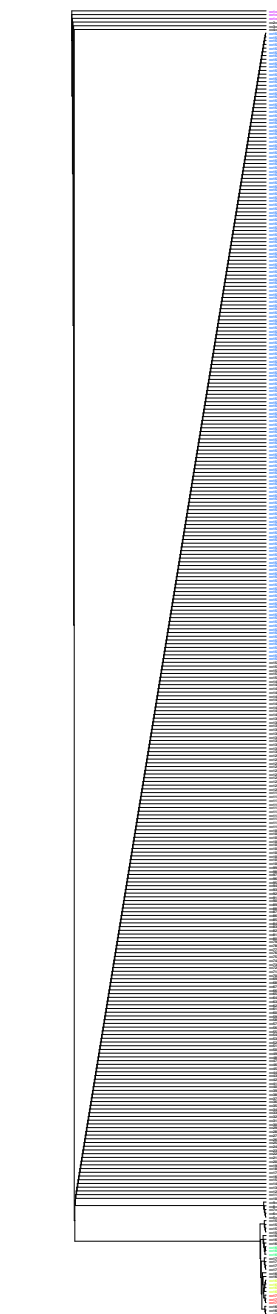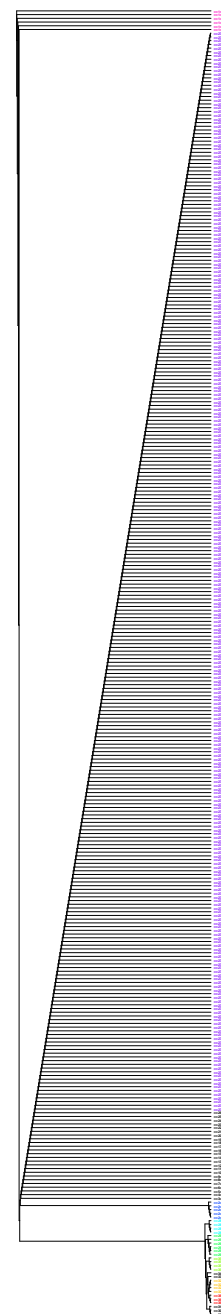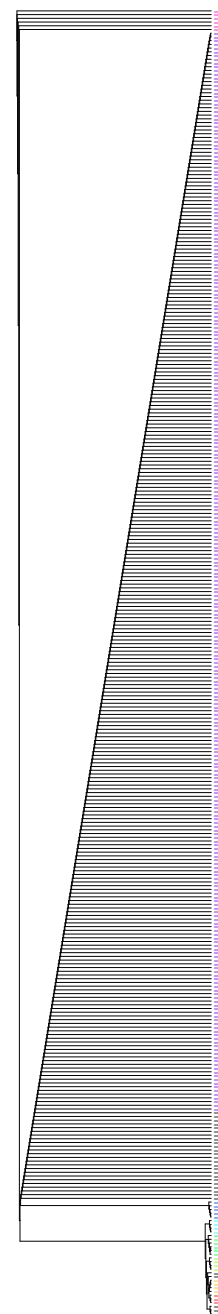

Country of origin

Max CGS(country)

Max MCC (country)

Max CGS(continent)

Max MCC (continent)

# EBER-2

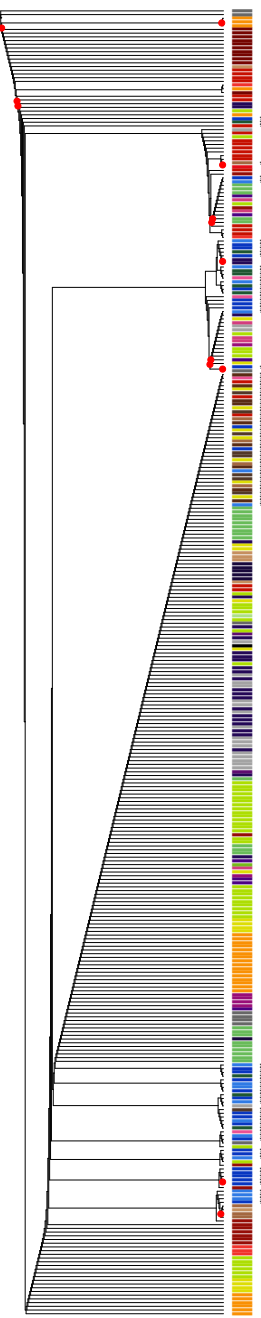

Country of origin

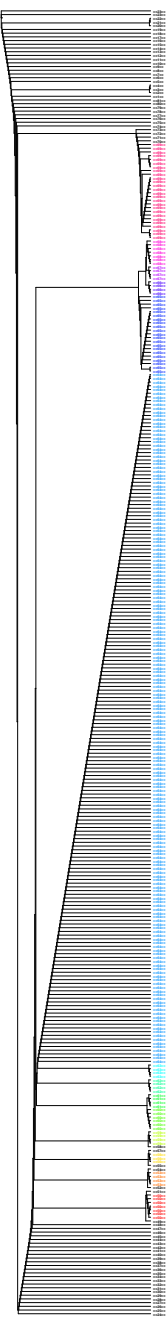

Max CGS(country)

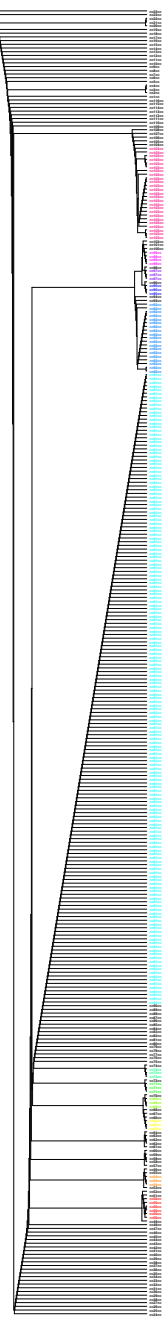

Max MCC (country)

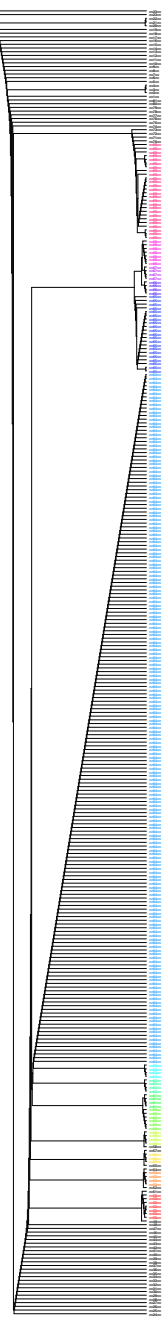

Max CGS(continent)

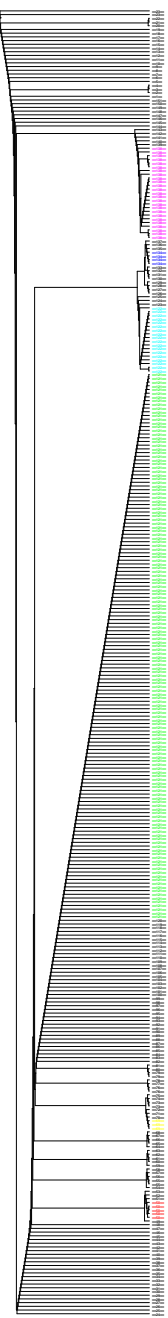

Max MCC (continent)

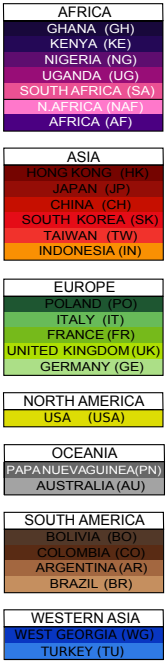



# EBNA-1

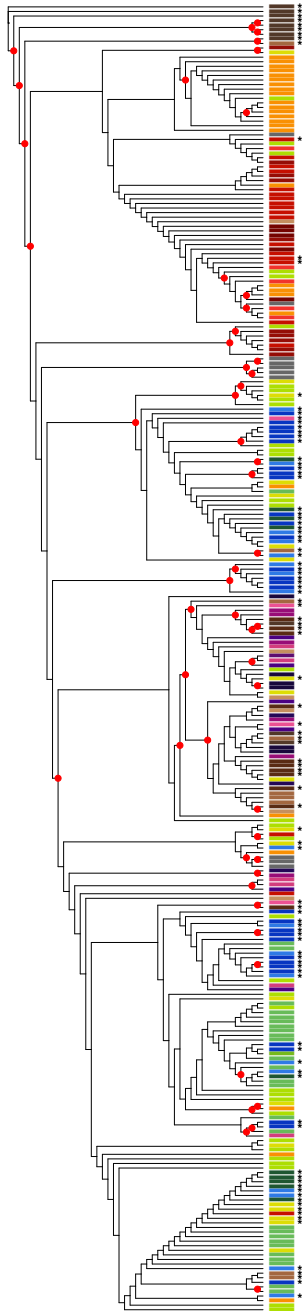

Country of origin

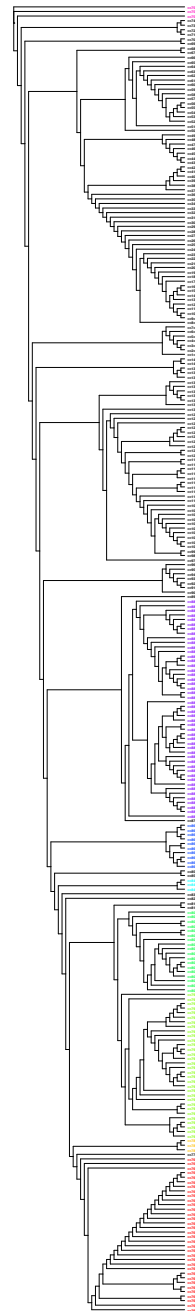

Max CGS(country)

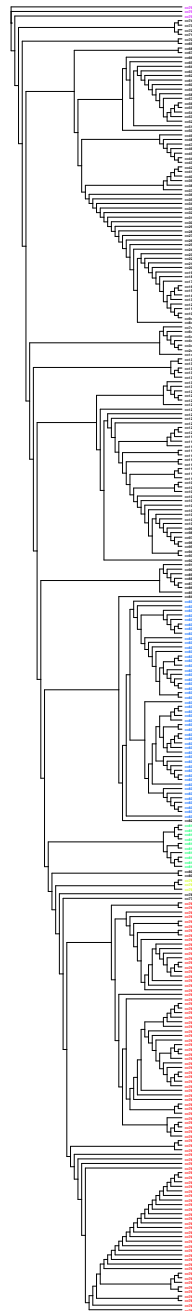

Max MCC (country)

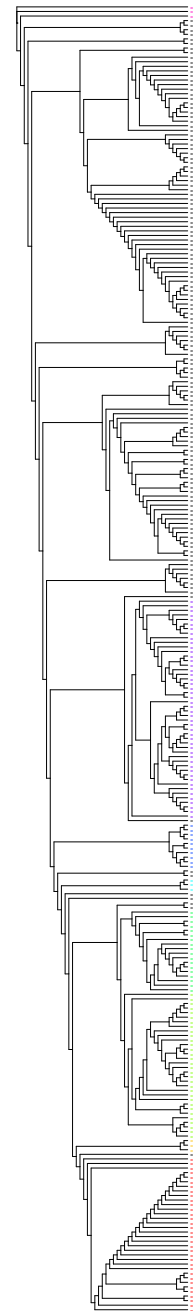

Max CGS(continent)

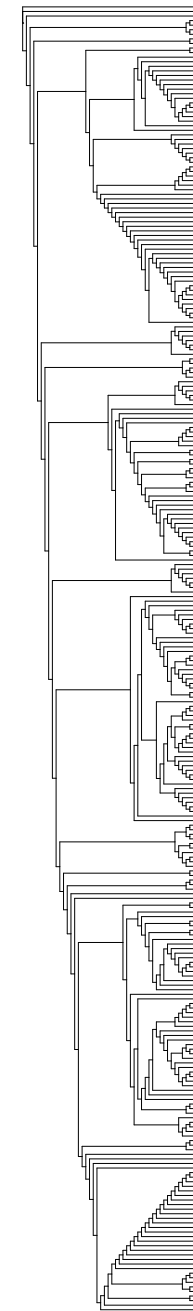

Max MCC (continent)

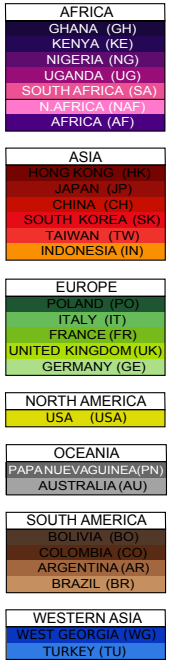

# EBNA-2 type1

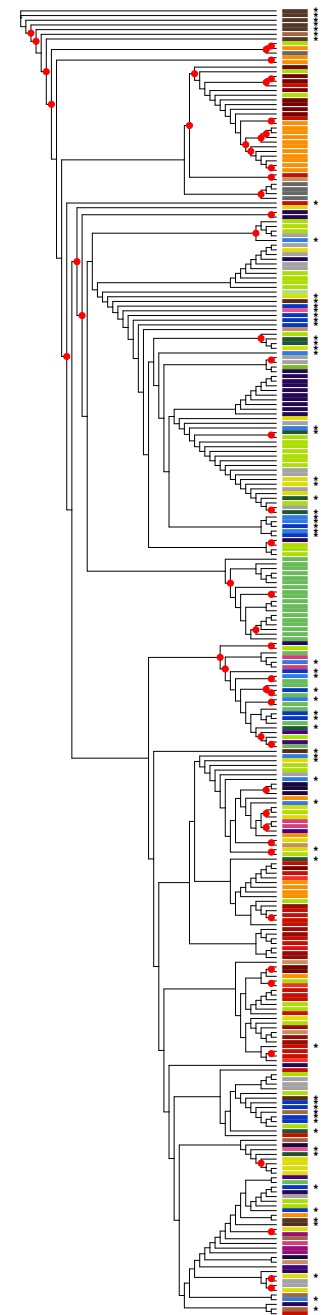

Country of origin

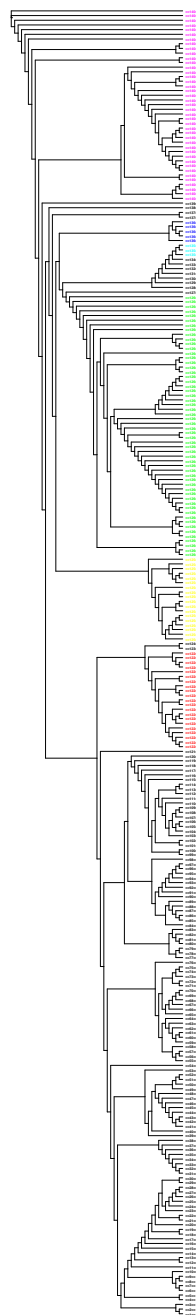

Max CGS(country)

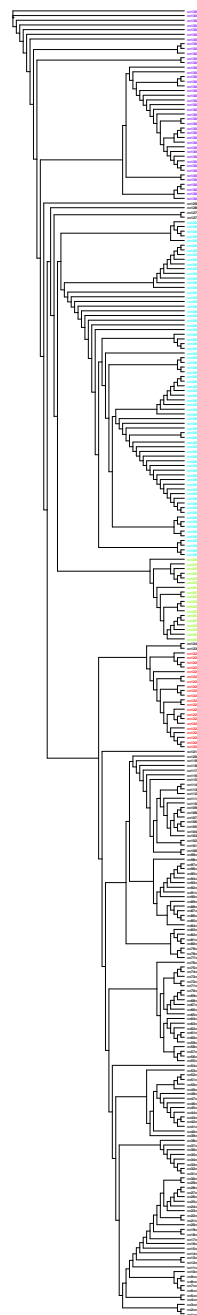

Max MCC (country)

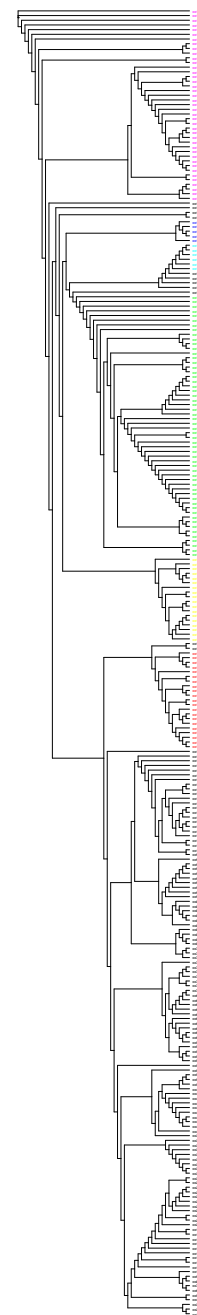

Max CGS(continent)

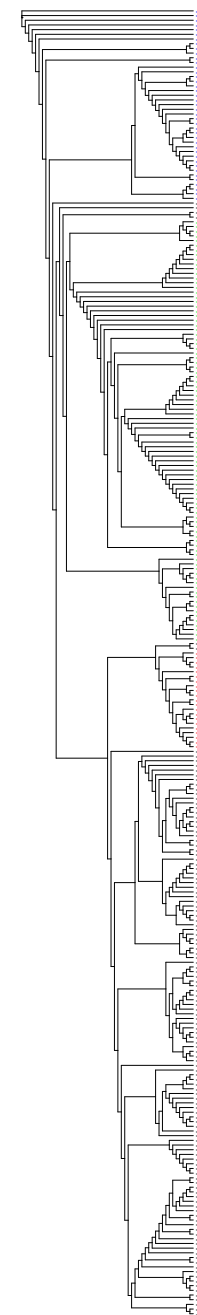

Max MCC (continent)

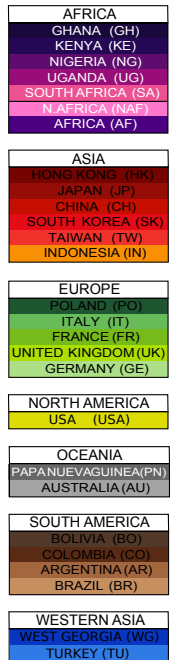

# EBNA-3A type1

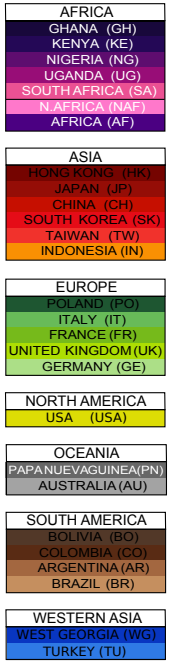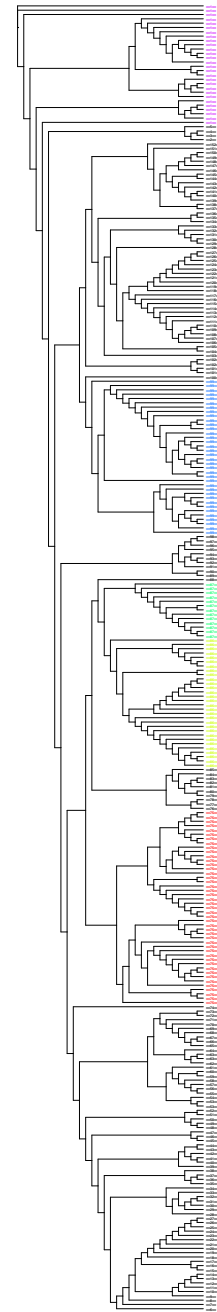

Max MCC (continent)

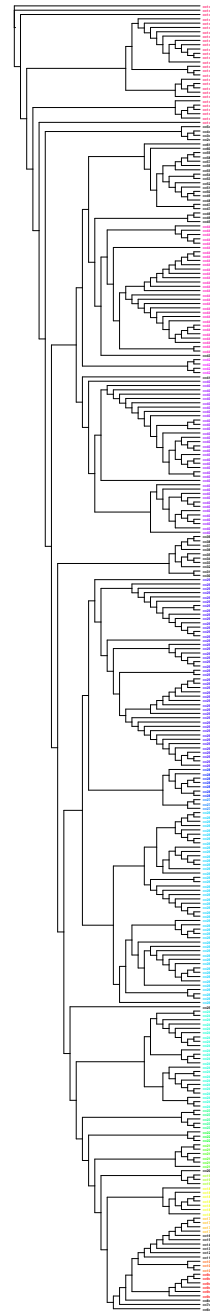

Max CGS(continent)

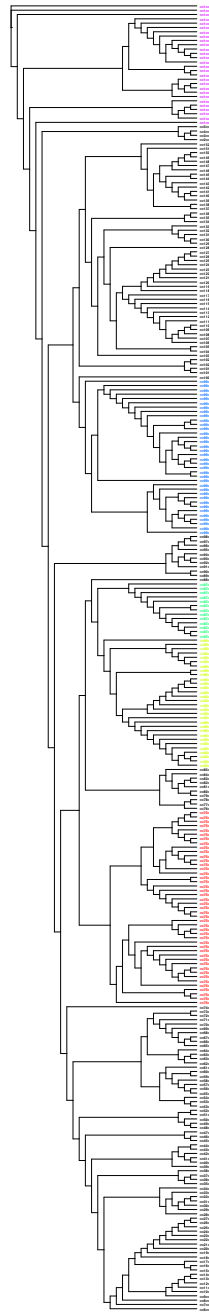

Max MCC (country)

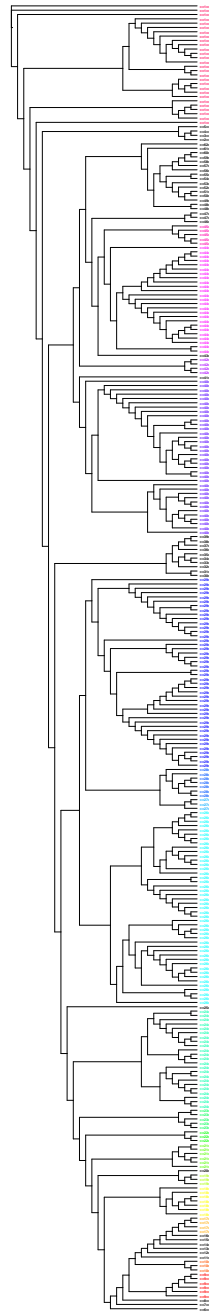

Max CGS(country)

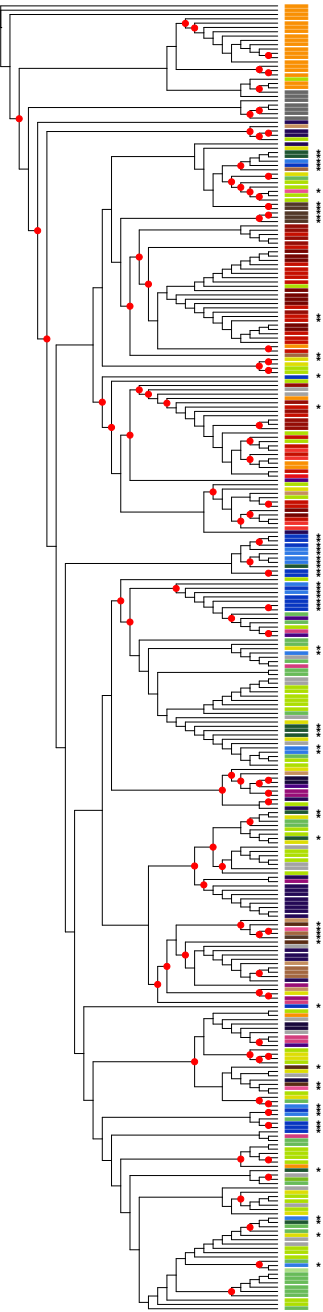

Country of origin

# EBNA-3B type1

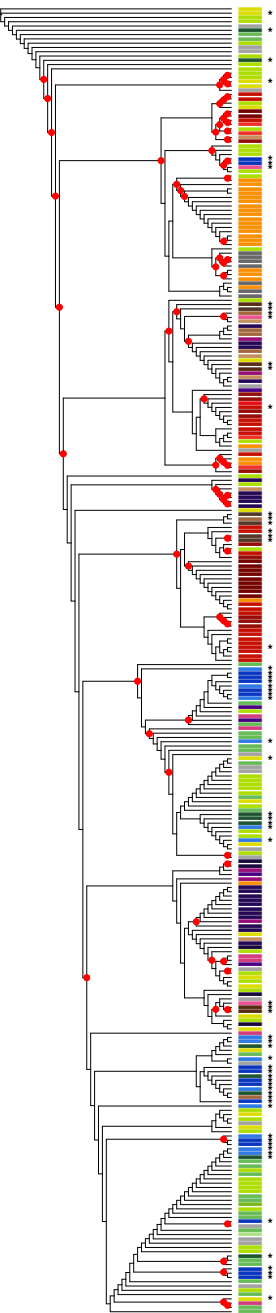

Country of origin

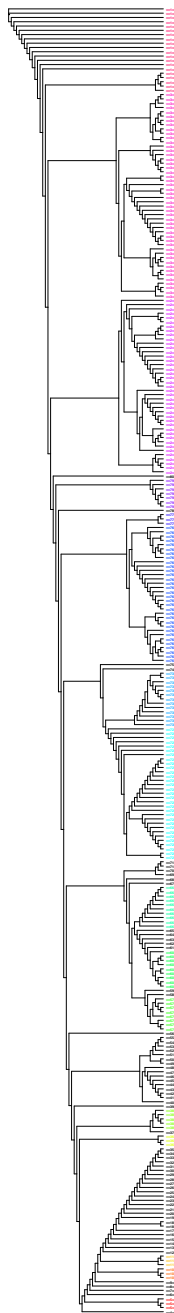

Max CGS(country)

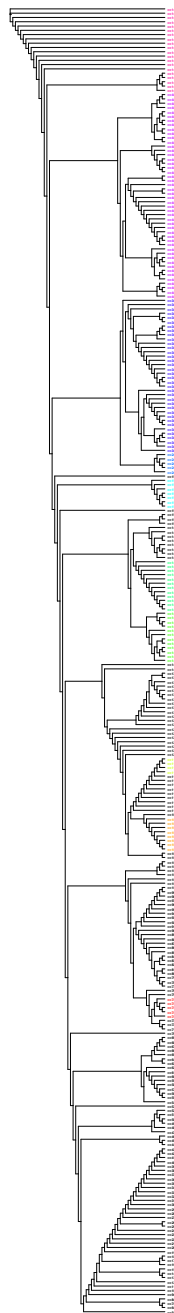

Max MCC (country)

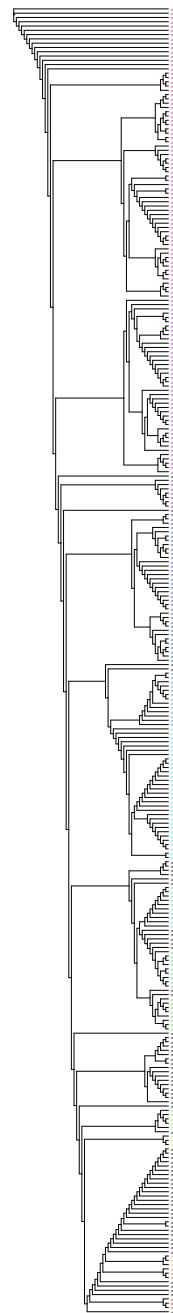

Max CGS(continent)

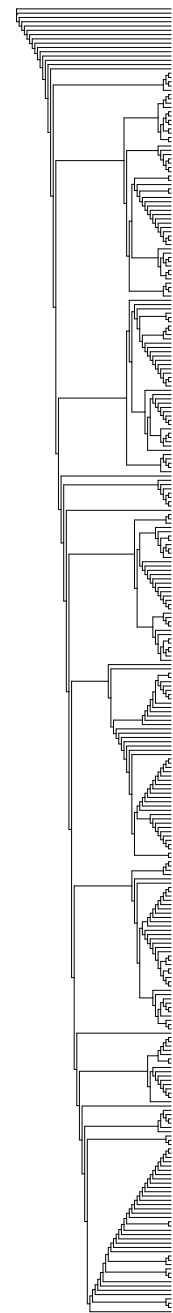

Max MCC (continent)

# EBNA-3C type1

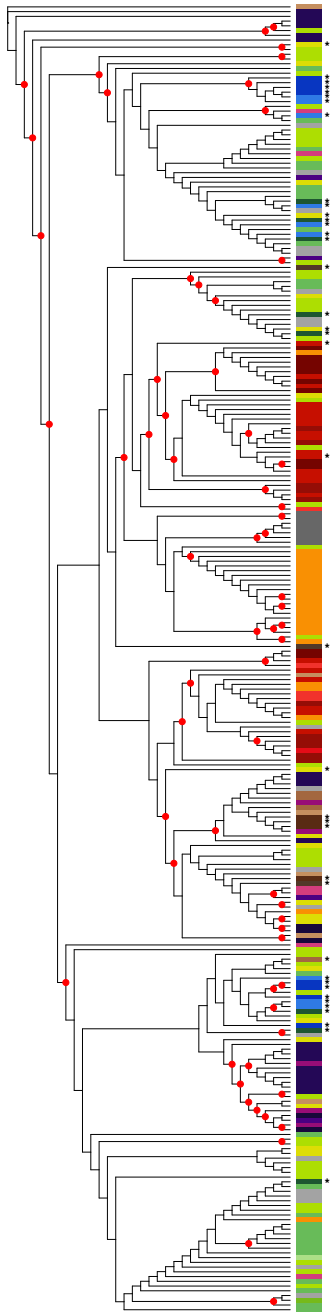

Country of origin

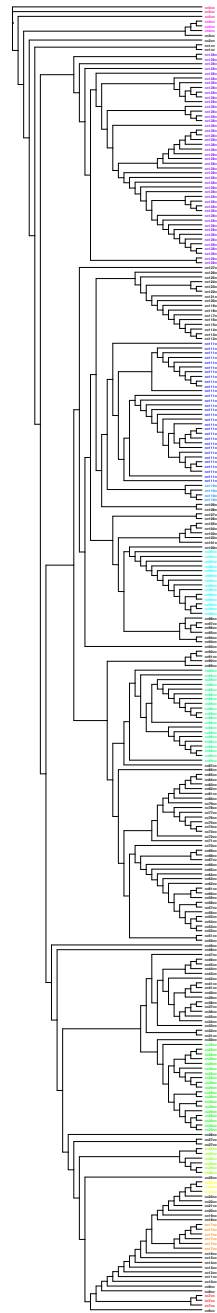

Max CGS(country)

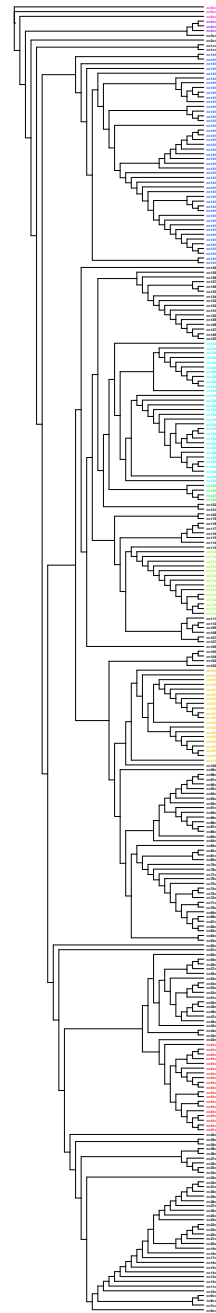

Max MCC (country)

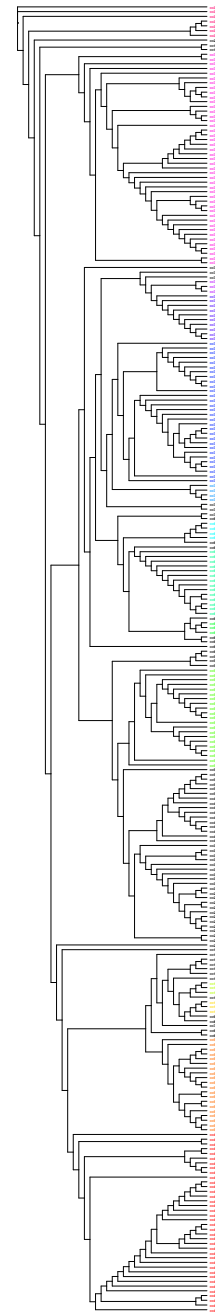

Max CGS(continent)

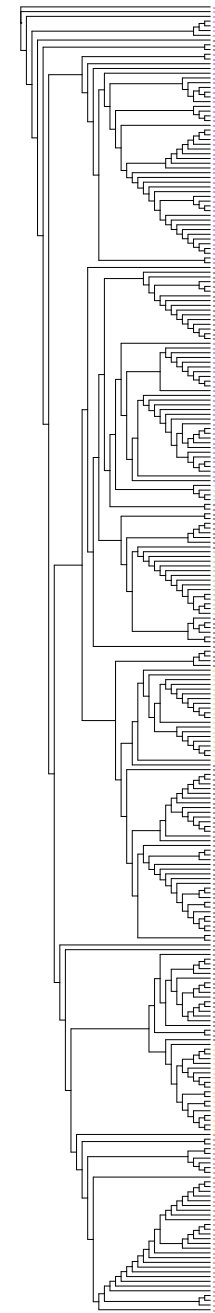

Max MCC (continent)



# LMP-2A

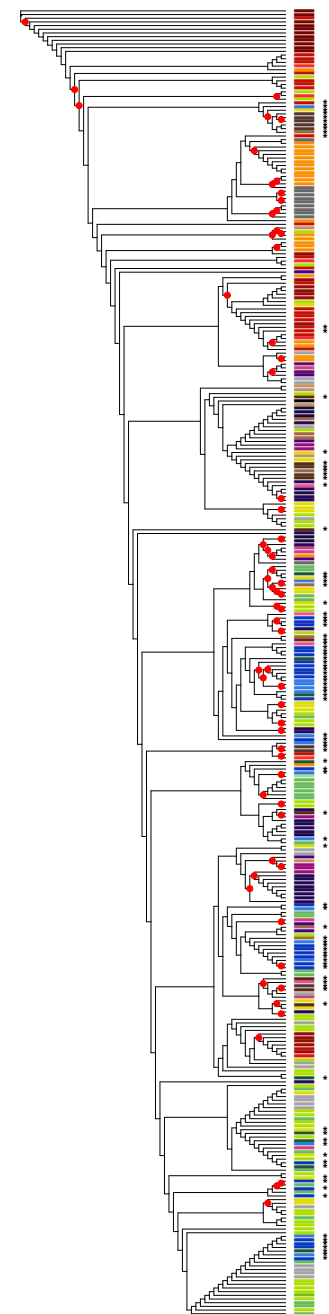

Country of origin

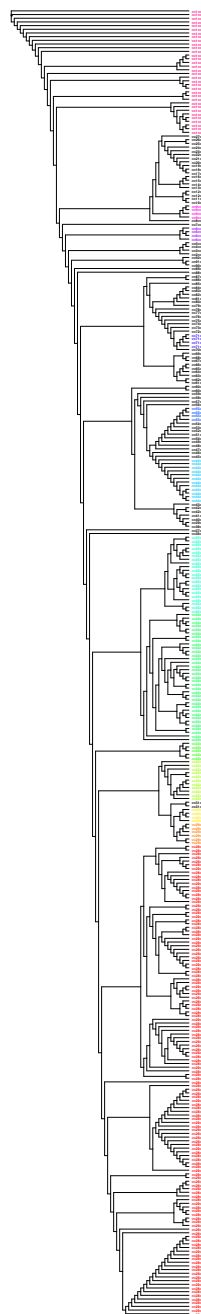

Max CGS(country)

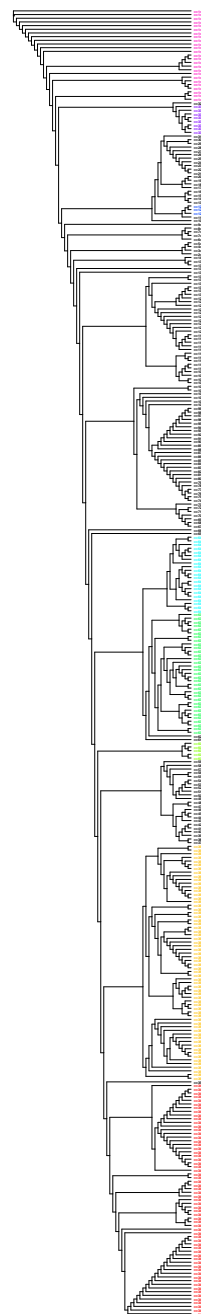

Max MCC (country)

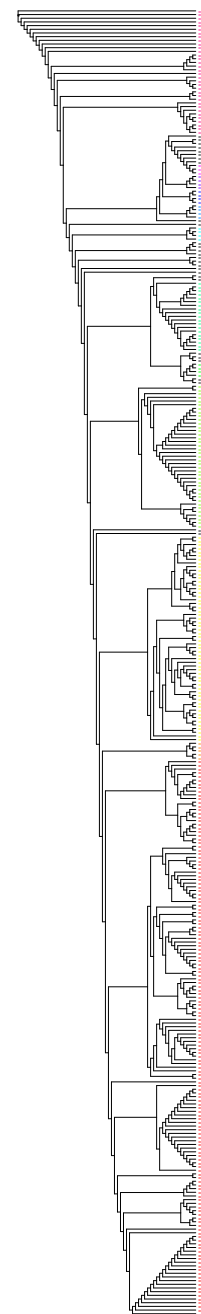

Max CGS(continent)

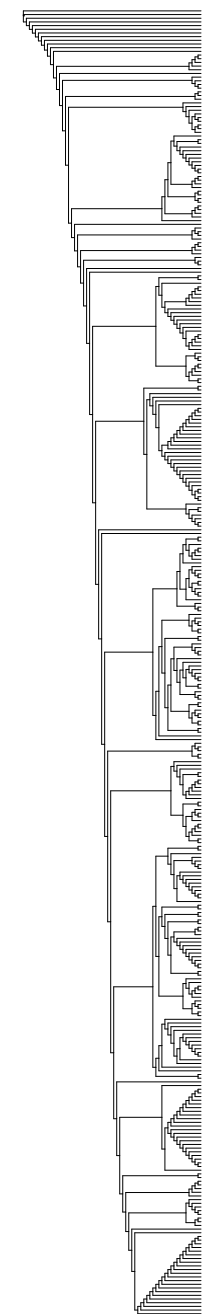

Max MCC (continent)



Supplement: s1 [file s1]
