# Supplementary material for: Expanding the Geographic Characterisation of Epstein–Barr Virus Variation through Gene-Based Approaches
Source: MDPI journal article supplement (doi:10.3390/microorganisms8111686), 2020-10-29
Supplement: s1 [file s1]

### **Supplementary Figure 4**

**Supertrees per gene class.** Supertree generated by combining the phylogenies **a)** Latent genes, and **b)** lytic genes. The strain labels are coloured by country of origin. The countries of the same continent are coloured by different shades of the same colour. The new sequences produced in this study are identified by black asterisks. Nodes with bootstraps values higher than 0.5 are indicated with a red circle.

A

Lytic genes supertree

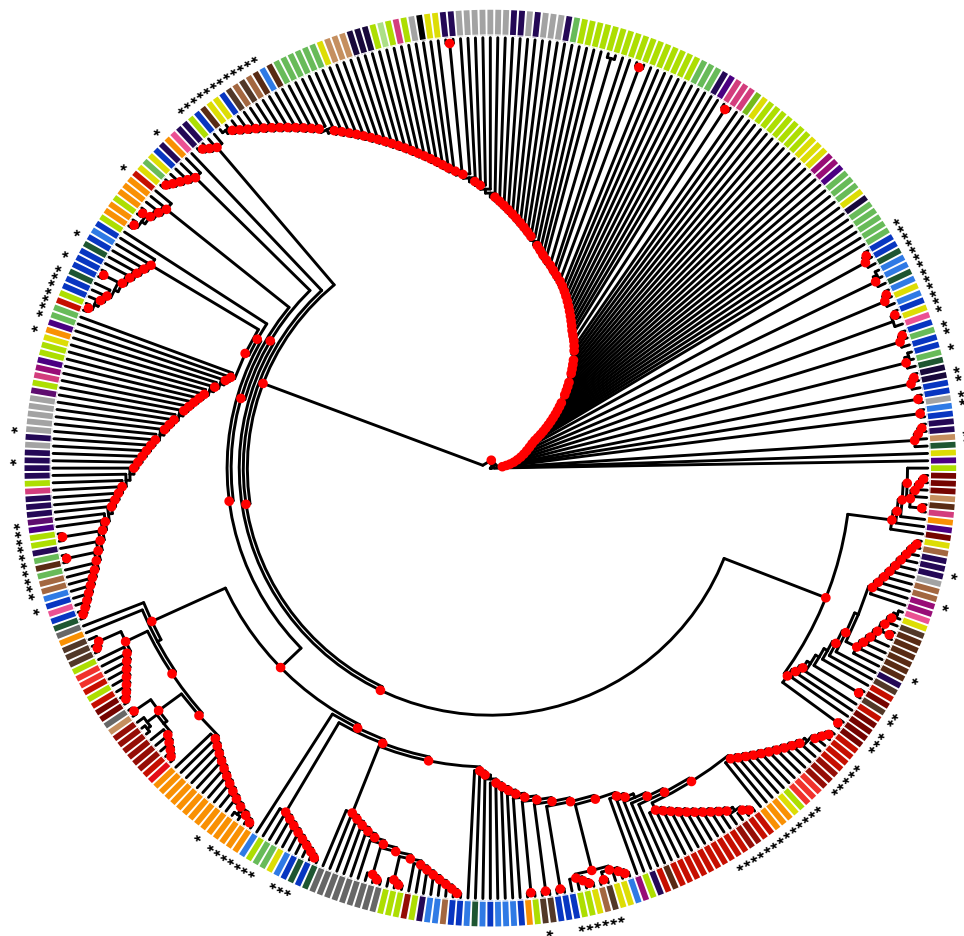

B

Latent genes supertree

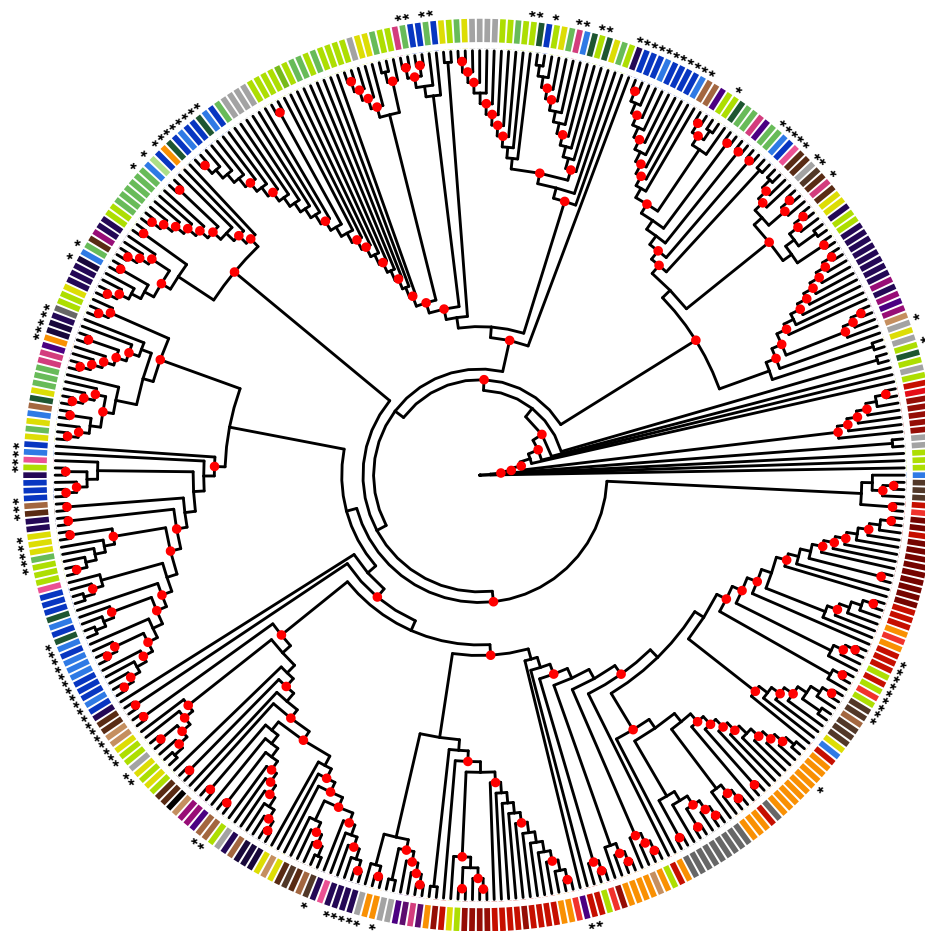

| AFRICA            |
|-------------------|
| GHANA (GH)        |
| KENYA (KE)        |
| NIGERIA (NG)      |
| UGANDA (UG)       |
| SOUTH AFRICA (SA) |
| N.AFRICA (NAF)    |
| AFRICA (AF)       |

| ASIA             |
|------------------|
| HONG KONG (HK)   |
| JAPAN (JP)       |
| CHINA (CH)       |
| SOUTH KOREA (SK) |
| TAIWAN (TW)      |
| INDONESIA (IN)   |

| EUROPE              |
|---------------------|
| POLAND (PO)         |
| ITALY (IT)          |
| FRANCE (FR)         |
| UNITED KINGDOM (UK) |
| GERMANY (GE)        |

| SOUTH AMERICA  |
|----------------|
| BOLIVIA (BO)   |
| COLOMBIA (CO)  |
| ARGENTINA (AR) |
| BRAZIL (BR)    |

| NORTH AMERICA |
|---------------|
| USA (USA)     |

| WESTERN ASIA      |
|-------------------|
| WEST GEORGIA (WG) |
| TURKEY (TU)       |

| OCEANIA              |
|----------------------|
| PAPANUEVAGUINEA (PN) |
| AUSTRALIA (AU)       |
