# Supplementary material for: Expanding the Geographic Characterisation of Epstein–Barr Virus Variation through Gene-Based Approaches
Source: MDPI journal article supplement (doi:10.3390/microorganisms8111686), 2020-10-29

### **Supplementary Figure 3**

#### **Proportion of the geographical populations in the supertree's clusters.**

Representation of the proportion of individual of each population falling in clusters where the population is significantly represented (tested through Fisher's exact test) for groupings generating from 1 to 200 clusters. The red vertical line identifies the optimal chosen clustering. Notice that the total number of clusters is not the one for which the Fisher's tests are applied, as the ones with less than 3 isolates are excluded from the analyses. The comparisons are against **a)** continent, and **b)** country of origin.

A

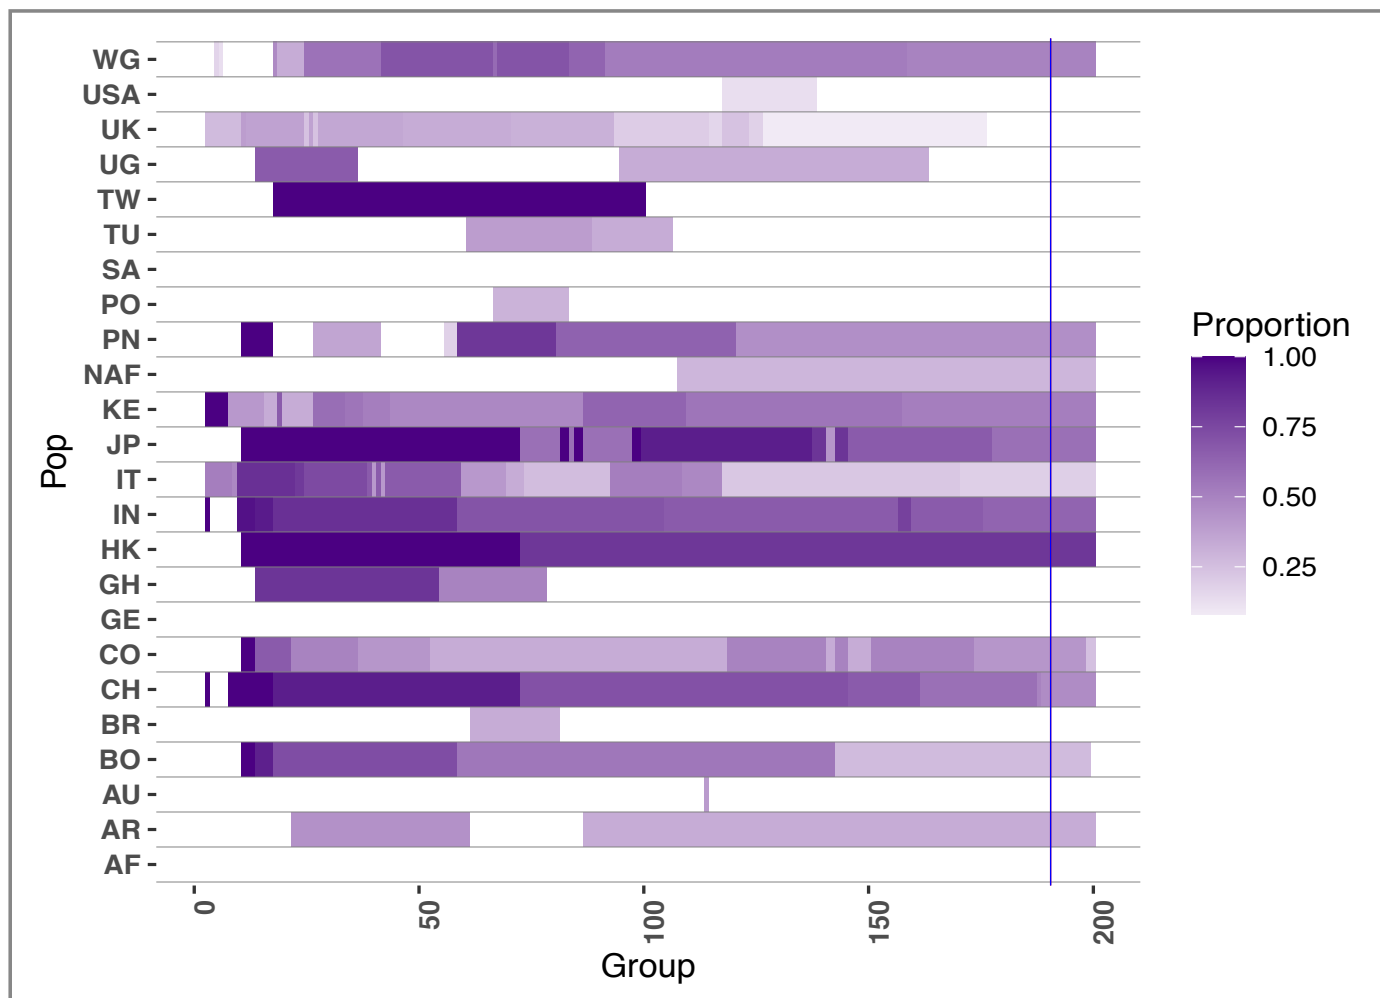

B

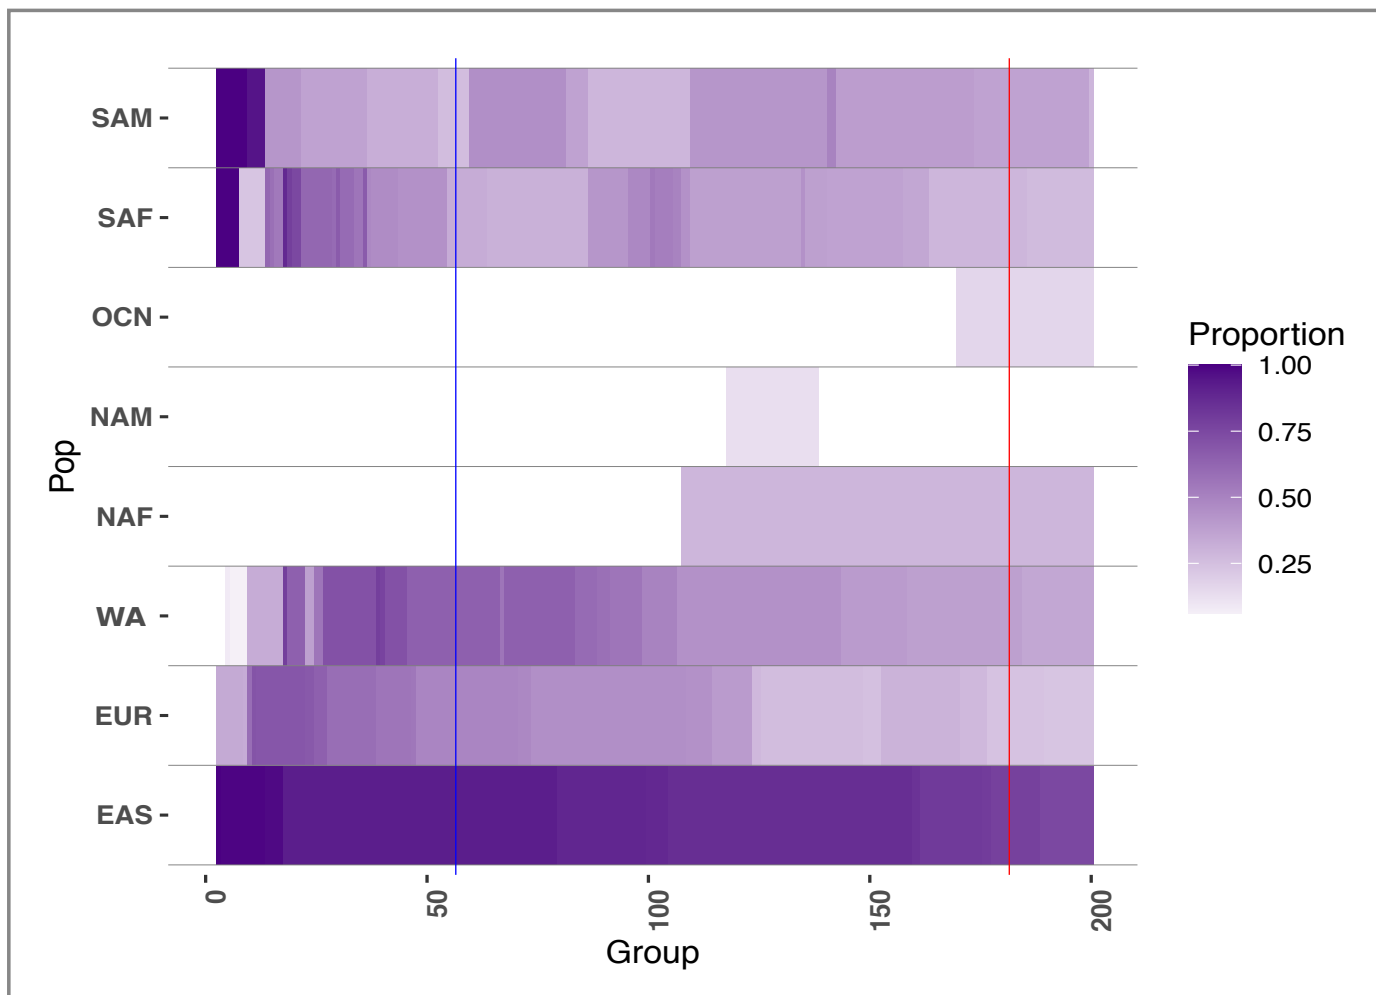

Supplement: s1 [file s1]
