# Supplementary material for: Expanding the Geographic Characterisation of Epstein–Barr Virus Variation through Gene-Based Approaches
Source: MDPI journal article supplement (doi:10.3390/microorganisms8111686), 2020-10-29

### **Supplementary Figure 9**

***EBNA-2* "CTC" insertion compared to geography.** *EBNA-2* phylogenetic tree coloured **a)** by country of origin, **b)** and by subtypes defined by the presence/absence and form of the "CTC" insertion.

***BHRF1* typing.** *BHRF1* maximum likelihood phylogenetic tree coloured by country of origin and *BHRF1* type.

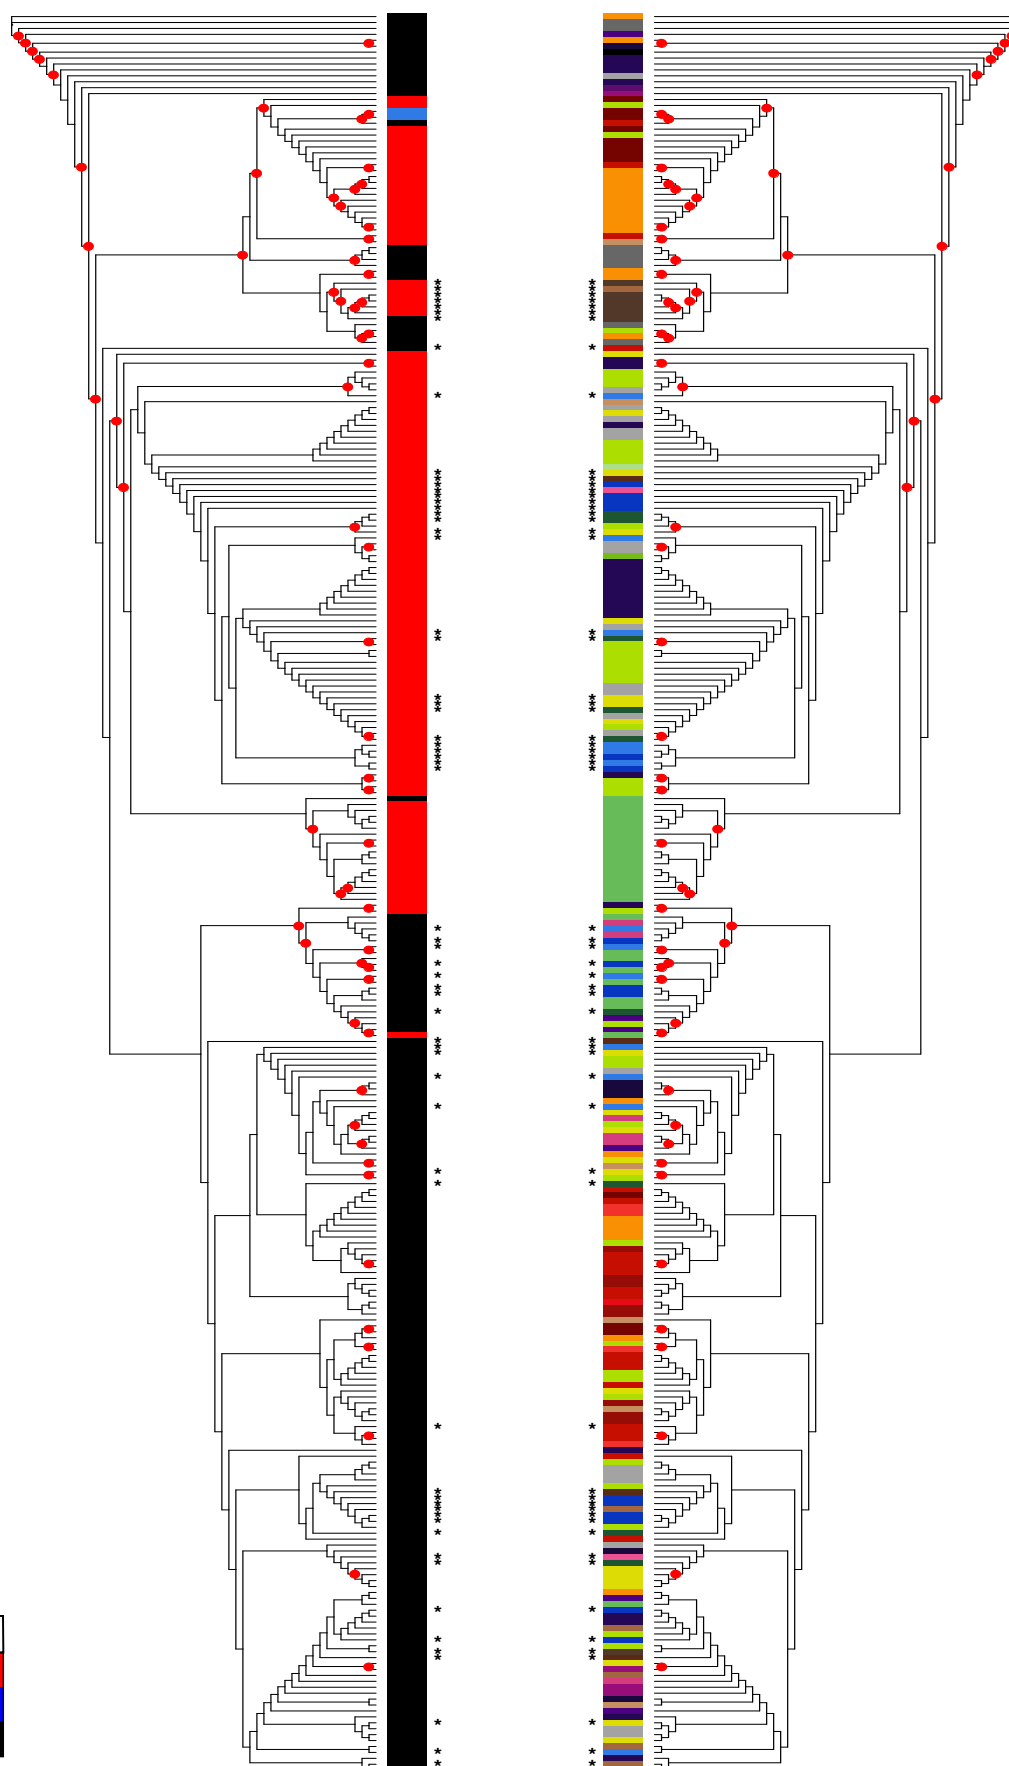

INSERTION pos.633

|         |
|---------|
| CTC     |
| CTT     |
| NO INS. |

| AFRICA            |
|-------------------|
| GHANA (GH)        |
| KENYA (KE)        |
| NIGERIA (NG)      |
| UGANDA (UG)       |
| SOUTH AFRICA (SA) |
| N.AFRICA (NAF)    |
| AFRICA (AF)       |

| ASIA             |
|------------------|
| HONG KONG (HK)   |
| JAPAN (JP)       |
| CHINA (CH)       |
| SOUTH KOREA (SK) |
| TAIWAN (TW)      |
| INDONESIA (IN)   |

| EUROPE             |
|--------------------|
| POLAND (PO)        |
| ITALY (IT)         |
| FRANCE (FR)        |
| UNITED KINGDOM(UK) |
| GERMANY (GE)       |

| SOUTH AMERICA  |
|----------------|
| BOLIVIA (BO)   |
| COLOMBIA (CO)  |
| ARGENTINA (AR) |
| BRAZIL (BR)    |

| NORTH AMERICA |
|---------------|
| USA (USA)     |

| WESTERN ASIA      |
|-------------------|
| WEST GEORGIA (WG) |
| TURKEY (TU)       |

| OCEANIA              |
|----------------------|
| PAPUANUEVAGUINEA(PN) |
| AUSTRALIA(AU)        |

| RESIDUES 79 & 88 |
|------------------|
| VL               |
| LL               |
| SL               |
| VV               |

| AFRICA            |
|-------------------|
| GHANA (GH)        |
| KENYA (KE)        |
| NIGERIA (NG)      |
| UGANDA (UG)       |
| SOUTH AFRICA (SA) |
| N.AFRICA (NAF)    |
| AFRICA (AF)       |

| ASIA             |
|------------------|
| HONG KONG (HK)   |
| JAPAN (JP)       |
| CHINA (CH)       |
| SOUTH KOREA (SK) |
| TAIWAN (TW)      |
| INDONESIA (IN)   |

| EUROPE              |
|---------------------|
| POLAND (PO)         |
| ITALY (IT)          |
| FRANCE (FR)         |
| UNITED KINGDOM (UK) |
| GERMANY (GE)        |

| SOUTH AMERICA  |
|----------------|
| BOLIVIA (BO)   |
| COLOMBIA (CO)  |
| ARGENTINA (AR) |
| BRAZIL (BR)    |

| NORTH AMERICA |
|---------------|
| USA (USA)     |

| WESTERN ASIA      |
|-------------------|
| WEST GEORGIA (WG) |
| TURKEY (TU)       |

| OCEANIA             |
|---------------------|
| PAPANUEVAGUINEA(PN) |
| AUSTRALIA(AU)       |

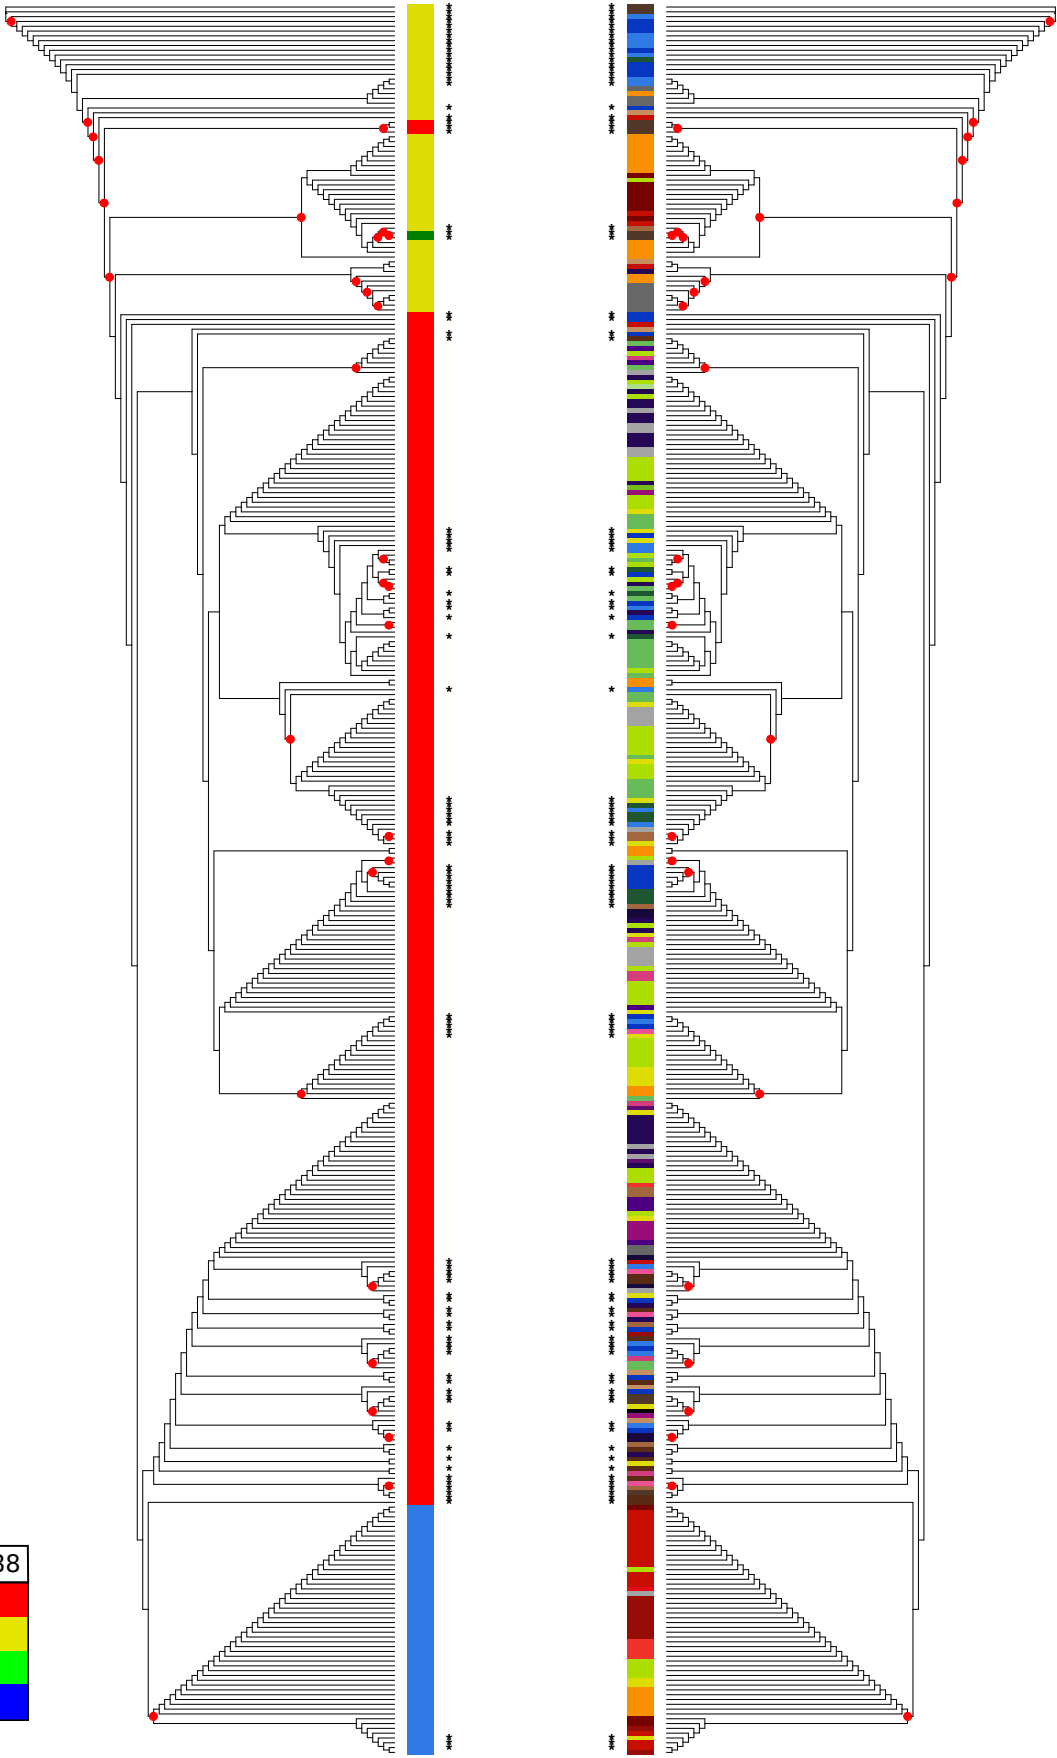

Supplement: s1 [file s1]
