# Supplementary material for: Expanding the Geographic Characterisation of Epstein–Barr Virus Variation through Gene-Based Approaches
Source: MDPI journal article supplement (doi:10.3390/microorganisms8111686), 2020-10-29

### **Supplementary Figure 1**

**Genetic population diversity and divergence.** Boxplots of the median bootstrapped genetic distances within (diversity) and between (divergence) population. For each gene the average and standard deviation are represented. The populations considered are: **a)** continents, and **b)** countries.

A

Diversity and divergence per gene: countries

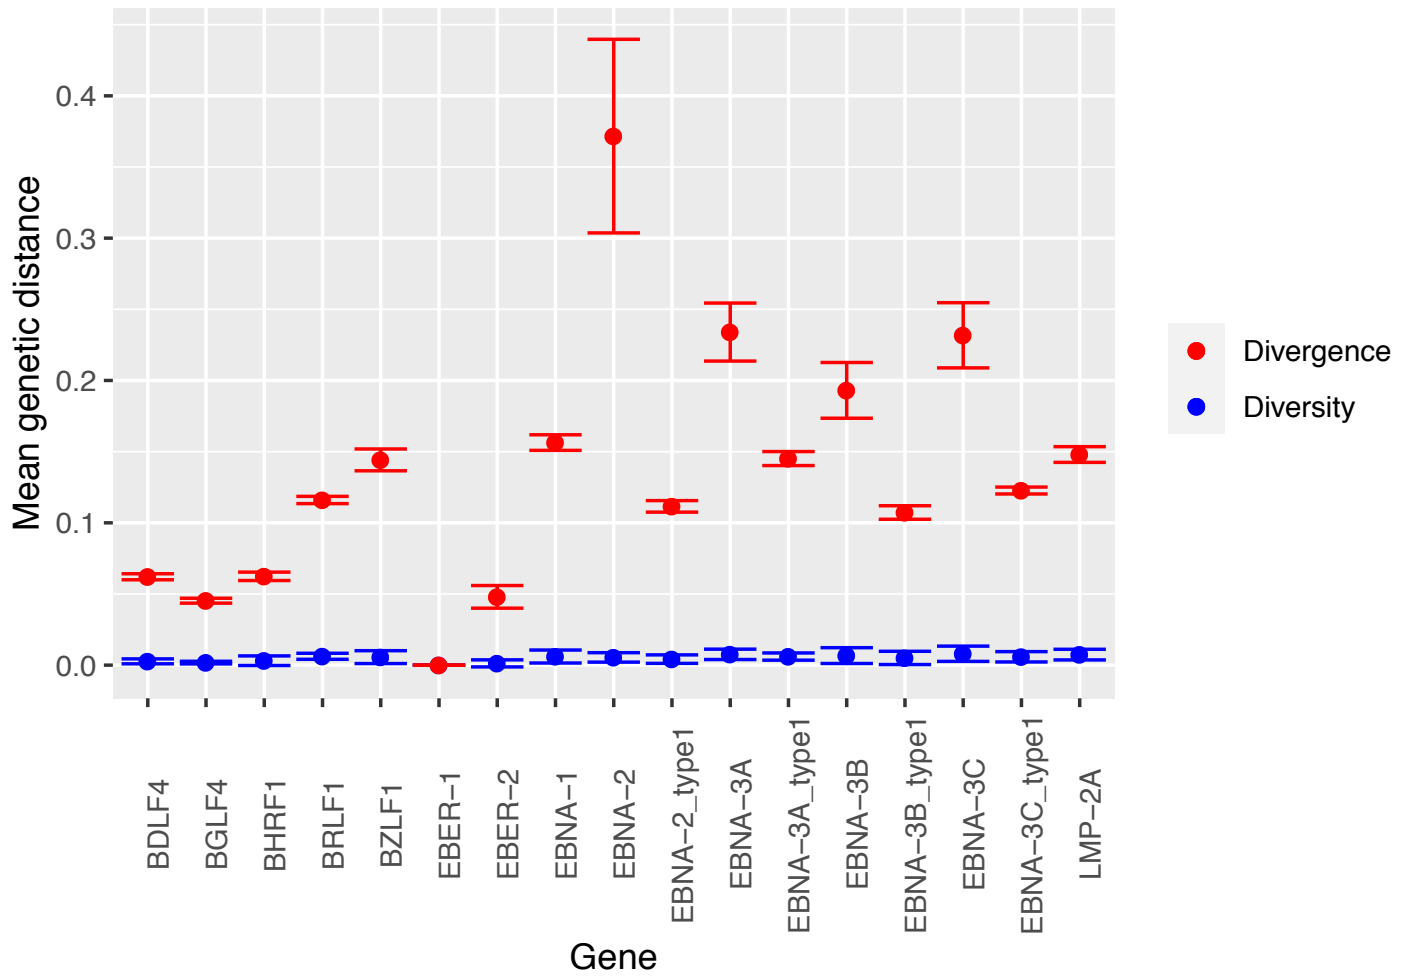

B

Diversity and divergence per gene: pseudo-continents

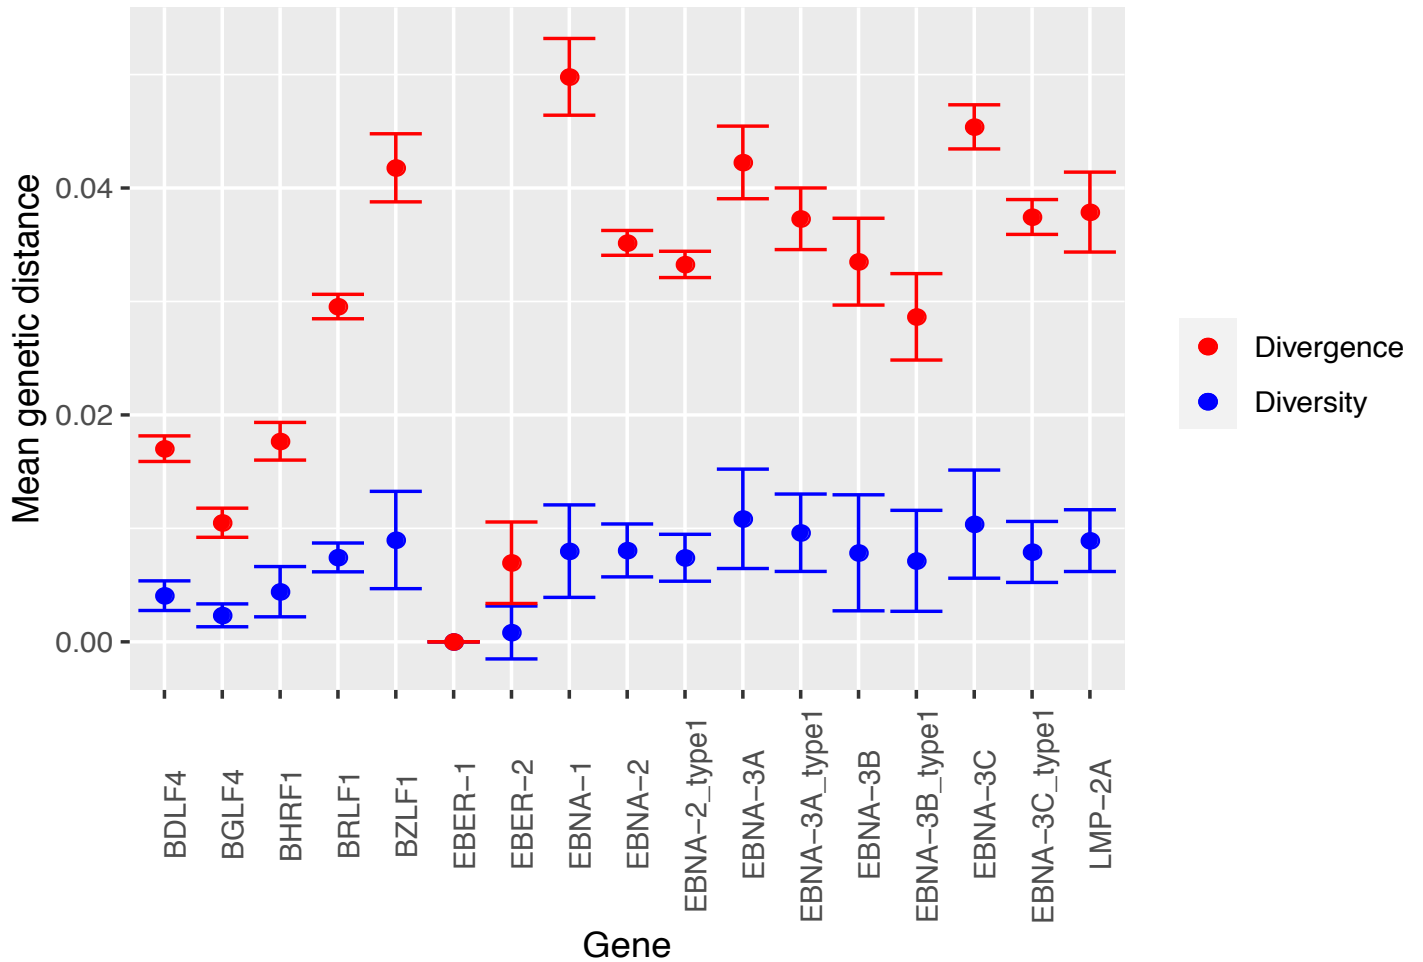

Supplement: s1 [file s1]
